# Supplementary material for: Structural basis for effector transmembrane domain recognition by type VI secretion system chaperones
Source: eLife. 2020 Dec 15;9:e62816. doi: 10.7554/eLife.62816 (PMC7773334; doi:10.7554/eLife.62816)
Supplement: Supplementary file 1. — The document contains two separate sheets. List A corresponds to 2054 prePAAR-containing sequences that were identified through an iterative search of the UniprotKB using Tse6NT. List B corresponds to 975 sequences collected following filtering of list A (see Materials and Methods for details). [file elife-62816-supp1.xlsx]

## Sheet: List A
UniProtKB_ID	Protein name	Gene name	Organism	Length	AA sequence
A0A447U9L5_SALET	Type IV secretion protein Rhs	NCTC6754_08213	Salmonella enterica I	97	MYEAARVDDPIYHTSALAGFLIGAIIGIAIIALAAFAFFSCGFLAGLILGFMADQIASGVLQLGEAIGRSIHHTAGKNPHRFGECQHQQSPGGPARY
A0A509CUP2_9ENTR	Rhs-family protein (SPI-6 associated)	NCTC11881_05013	Salmonella sp. NCTC 11881	198	MYEAARVDDPIYHTSALAGFLIGAIIGIAIIALAAFAFFSCGFLAGLILGFMADQIASGVLQLGEAIGRSIHHTAGKILTGSENVSTNSRPAARAVLSTVKCDNHIAEKRIAQGSENIYINSQPAARKDDHTECDAVIEDGSPNVFLGGGTQTVLEISSEIPDWLRKVVDVLFVVASLLGGLAGAWRQAAKLGDEIWH
A0A3U0YJG6_SALET	Uncharacterized protein (Fragment)	DNZ24_21795	Salmonella enterica I	147	MYEAARVDDPIYHTSALAGFLIGAIIGIAIIALAAFAFFSCGFLAGLILGFMADQIASGVLQLGEAIGRSIHHTAGKILTGSENVSTNSRPAARAVLSTVKCDNHIAEKRIAQGSENIYINSQPAARKDDHTECDAVIEDGSPNVFL
E8XIV6_SALT4	Rhs1 protein	rhs1 STM474_0303	Salmonella typhimurium (strain 4/74)	1200	MTMYEAARVDDPIYHTSALAGFLIGAIIGIAIIALAAFAFFSCGFLAGLILGFMADQIASGVLQLGEAIGRSIHHTAGKILTGSENVSTNSRPAARAVLSTVKCDNHIAEKRIAQGSENIYINSQPAARKDDHTECDAVIEDGSPNVFLGGGTQTVLEISSEIPDWLRKVVDVLFVVASLLGGLAGAWRQAAKLGTKFGTKCAAKFIGGELVGMAVGEAISGLFSNPVDVTTGQKILLPETDFTLPGRLPVTCSRFYASHLETVGLLGRGWRLNWETSLRDDDEHITLTGVQGRELRYPKTMLTPGHQIFDPEEQLYLSRLHDGRYVLHYTDRSYYVFGDFDSDGMAYLLFMETPHRQRIVFGHEGGRLVRIASSSGHHLLLHRTQTPAGERLSRIELV…
A0A0H3N9J2_SALTS	Rhs-family protein (SPI-6 associated)	SL1344_0286	Salmonella typhimurium (strain SL1344)	1200	MTMYEAARVDDPIYHTSALAGFLIGAIIGIAIIALAAFAFFSCGFLAGLILGFMADQIASGVLQLGEAIGRSIHHTAGKILTGSENVSTNSRPAARAVLSTVKCDNHIAEKRIAQGSENIYINSQPAARKDDHTECDAVIEDGSPNVFLGGGTQTVLEISSEIPDWLRKVVDVLFVVASLLGGLAGAWRQAAKLGTKFGTKCAAKFIGGELVGMAVGEAISGLFSNPVDVTTGQKILLPETDFTLPGRLPVTCSRFYASHLETVGLLGRGWRLNWETSLRDDDEHITLTGVQGRELRYPKTMLTPGHQIFDPEEQLYLSRLHDGRYVLHYTDRSYYVFGDFDSDGMAYLLFMETPHRQRIVFGHEGGRLVRIASSSGHHLLLHRTQTPAGERLSRIELV…
A0A3W0GDH7_SALER	Uncharacterized protein (Fragment)	B1Q59_25490	Salmonella enterica (Salmonella choleraesuis)	197	MYEAARVDDPIYHTSALAGFLIGAIIGIAIIALAAFAFFSCGFLAGLILGFMADQIASGVLQLGEAIGRSIHHTAGKILTGSENVSTNSRPAARAVLSTVKCDNHIAEKRIAQGSENIYINSQPAARKDDHTECDAVIEDGSPNVFLGGGTQTVLEISSEIPDWLRKVVDVLFVVASLLGGLAGAWRQAAKLGTKFG
Q3Z4M5_SHISS	Uncharacterized protein	SSON_0518	Shigella sonnei (strain Ss046)	361	MRMLSQQAMVASQMKRAANDKAIAQMLASKKSGPPAARLGDEIQHKSFLGALAGAVLGAIVTIAEGCLIMAACATGPYALVLVPALMYASYKASDYVEEKQNQLESWINSFCDTDGAINTGSENVKINGELAARAAVTLPPPPPPGAIPEVPQGEPSWGDIATDLLESAAEKAVPLAKAWGNAVITLTDSNAGFMDRVSAGASLLFPAGPVLMEFATMVGGRGEIKKDVDFPEAGEDTALCDKENKPPRIAQGSSNVFINNQPAARKGDKLECSAAIVGGSPDVFIGGEQVTYLDIQPEFPPWQRMILGGITIASYLLPPAGLLGKLKNLARLGKLGNCWGKAGSCWAQSSARCWGKQVSR
A0A0I5BIY1_SHISO	Uncharacterized conserved protein	BZ172_18640 SAMEA3891730_01109	Shigella sonnei	379	MSEGPGGPQGATAGGTLAMRMLSQQAMVASQMKRAANDKAIAQMLASKKSGPPAARLGDEIQHKSFLGALAGAVLGAIVTIAEGCLIMAACATGPYALVLVPALMYASYKASDYVEEKQNQLESWINSFCDTDGAINTGSENVKINGELAARAAVTLPPPPPPGAIPEVPQGEPSWGDIATDLLESAAEKAVPLAKAWGNAVITLTDSNAGFMDRVSAGASLLFPAGPVLMEFATMVGGRGEIKKDVDFPEAGEDTALCDKENKPPRIAQGSSNVFINNQPAARKGDKLECSAAIVGGSPDVFIGGEQVTYLDIQPEFPPWQRMILGGITIASYLLPPAGLLGKLKNLARLGKLGNCWGKAGSCWAQSSARCWGKQVSR
D2A7R7_SHIF2	Putative Rhs-family protein	SFxv_0281	Shigella flexneri serotype X (strain 2002017)	135	MYEAARVDDPIYHTSALAGFLIGAIIGIAIIAVASFAFFTCGFLAGLILSFLADQIASGVLQLGEAIGRSIHSTVGKILTGSDNVSTNSRPAARAVLSTVICEDHSPEIRIAQGSGNIYINSQLPVRMTTLSVMQ
A0A2I8JK25_SHIFL	Putative Rhs-family protein	S0287 NCTC9783_04917 SAMEA3710568_02870	Shigella flexneri	135	MYEAARVDDPIYHTSALAGFLIGAIIGIAIIAVASFAFFTCGFLAGLILSFLADQIASGVLQLGEAIGRSIHSTVGKILTGSDNVSTNSRPAARAVLSTVICEDHSPEIRIAQGSGNIYINSQLPVRMTTLSVMQ
A0A2Y2RJM1_SHIFL	Putative Rhs-family protein (Type IV secretion protein Rhs)	GJE14_19280 SAMEA3891773_02720	Shigella flexneri 2a	135	MYEAARVDDPIYHTSALAGFLIGAIIGIAIIAVASFAFFTCGFLAGLILSFLADQIASGVLQLGEAIGRSIHSTVGKILTGSDNVSTNSRPAARAVLSTVICEDHSPEIRIAQGSGNIYINSQLPVRMTTLSVMQ
Q0T7P0_SHIF8	Putative Rhs-family protein	SFV_0312	Shigella flexneri serotype 5b (strain 8401)	135	MYEAARVDDPIYHTSALAGFLIGAIIGIAIIAVASFAFFTCGFLAGLILSFLADQIASGVLQLGEAIGRSIHSTVGKILTGSDNVSTNSRPAARAVLSTVICEDHSPEIRIAQGSGNIYINSQLPVRMTTLSVMQ
D7ZHB4_ECOLX	Uncharacterized protein (Fragment)	HMPREF9534_03659	Escherichia coli MS 69-1	307	MSEGPGGPQGATAGGTLAMRMLSQQAMVASQMKRAANDKAIAQMLASKKSGPPAARLGDEIQHKSFLGALAGAVLGAIVTIAEGCLIMAACATGPYALVLVPALMYASYKASDYVEEKQNQLESWINSFCDKDGAINTGSKNVNINGKPAARAAVTLPPPPLTEAIPSPPQGEPSWGDIATDLLESAAEKAVPLAKAWGNAIITLTDNNAGIMDRVSAGASLLFPAGPVLMEFATMVGGRGEIKKDVDFPEAGEDTALCDKETKPPRIAQGSSNVFINNQPAARKGDKLECSAAIVEGSPDVFIGGE
A0A3M5CCU8_9PSED	YD repeat protein (Fragment)	ALP67_05296	Pseudomonas ficuserectae	77	MGLPHCFFCSGLAGVGAMFEAARFGDEISHSSALGGFLIGAVLGIALIATVAIATFTCGFGVALLAGLAAGSEVACS
U9YIV9_ECOLX	Uncharacterized protein (Fragment)	HMPREF1588_03880	Escherichia coli 110957	320	MSEGPGGPQGATAGGTLAMRMLSQQAMVASQMKRAANDKAIAQMLASKKSGPPAARLGDEIQHKSFLGALAGAVLGAIVTIAEGCLIMAACATGPYALVLVPALMYASYKASDYVEEKQNQLESWINSFCDTDGAINTGSKNVKINGELAARAAVTLPPPPPPGAIPEVPQGDPSWGDIATDLLESAAEKAVPLAKAWGNAVITLTDSNAGIMDRVSAGASLLFPAGPVLMEFATMVGGRGEIKKDVDFPEAGEDTALCDKENKPPRIAQGSSNVFINNQPAARKGDKLECSAAIVEGSPDVFIGGEQVTYLDIQPEFPP
A0A3Z4DQX4_SHISO	Uncharacterized protein	D6Z98_11695	Shigella sonnei	379	MSEGPGGPQGATAGGTLAMRMLSQQAMVASQMKRAANDKAIAQMLASKKSGPPAARLGDKIQHKSFLGALAGAVLGAIVTIAEGCLIMAACATGPYALVLVPALMYASYKASDYVEEKQNQLESWINSFCDTDGAINTGSENVKINGELAARAAVTLPPPPPPGAIPEVPQGEPSWGDIATDLLESAAEKAVPLAKAWGNAVITLTDSNAGFMDRVSAGASLLFPAGPVLMEFATMVGGRGEIKKDVDFPEAGEDTALCDKENKPPRIAQGSSNVFINNQPAARKGDKLECSAAIVGGSPDVFIGGEQVTYLDIQPEFPPWQRMILGGITIASYLLPPAGLLGKLKNLARLGKLGNCWGKAGSCWAQSSARCWGKQVSR
A0A399VT31_RALSL	Uncharacterized protein (Fragment)	RSP822_23675	Ralstonia solanacearum (Pseudomonas solanacearum)	244	MFEAARVTDPIEHTSALTGFLIGAVLGVALIAAVAFATFTCGFGVALLAGLAAGVGASAILGLGEAIGKSRWFTSTTGTILTGSTNVFVNGKLAAFATASTVACSKHSPVPLIAQGSGGVFINSKPAARKGDKITCGAAVADGSSNVFMGGGTQTYLPYDDEVPPWLRTTVDWAFALAGLVGGLAGLVKAAGGLSRAVLPCAAKFIGGYVIGEAVGRYVAAPVVSRVMGGLFGHPVDVTTGRKV
A0A3V0Z7C7_SHISO	Uncharacterized protein	DOU24_03575 DRW21_11135	Shigella sonnei	379	MSEGPGGPQGATAGGTLAMRMLSQQAMVASQMKRAANDKAIAQMLASKKSGPPAARLGDEIQHKSFLGALAGAVLGAIVTIAEGCLIIAACATGPYALVLVPALMYASYKASDYVEEKQNQLESWINSFCDTDGAINTGSENVKINGELAARAAVTLPPPPPPGAIPEVPQGEPSWGDIATDLLESAAEKAVPLAKAWGNAVITLTDSNAGFMDRVSAGASLLFPAGPVLMEFATMVGGRGEIKKDVDFPEAGEDTALCDKENKPPRIAQGSSNVFINNQPAARKGDKLECSAAIVGGSPDVFIGGEQVTYLDIQPEFPPWQRMILGGITIASYLLPPAGLLGKLKNLARLGKLGNCWGKAGSCWAQSSARCWGKQVSR
A0A379WZH4_SALET	Rhs-family protein (SPI-6 associated)	NCTC8261_05725	Salmonella enterica I	435	MYEAARVDDPIYHTSALAGFLIGAIIGIAIIALAAFAFFSCGFLAGLILGFMADQIASGVLQLGEAIGRSNHHTAGKILTGSENVSTNSRPAARAVLSTVKCDNHIAEKRIAQGSENIYINSQPAARKDDHTECDAVIEDGSPNVFLGGGTQTVLEISSEIPDWLRKVVDVLFVVASLLGGLAGAWRQAAKLGTKFGTKCAAKFIGGELVGMAVGEAISGLFSNPVDVTTGQKILLPETDFTLPGRLPVTCSRFYASHLETVGLLGRGWRLNWETSLREDDEHITLTGVQGRELRYPKTMLTPGHQIFDPEEQLYLSRLHDGRYVLHYTDRSYYVFGDFDSDGMAYLLFMETPHRQRIVFGHEGGRLVRIASSSGHHLLLHRTQTPAGERLSRIELVQG…
A0A3Y9C2G8_SALET	RHS repeat protein (Fragment)	AU894_18050	Salmonella enterica I	438	MYEAARVDDPIYHTSALAGFLIGAIIGIAIIALAAFAFFSCGFLAGLILGFMADQIASGVLQLGEAIGRSIHHTAGKILTGSENVSTNSRPAARAVLSTVKCDNHIAEKRIAQGSENIYINSQPAARKDDHTECDAVIEDGSPNVFLGGGTQTVLEISSEIPDWLRKVVDVLFVVASLLGGLAGAWRQAAKLGTKFGTKCAAKFIGGELTGMAVSEAISGLFSNPVDVTTGQKILLPETDFTLPGRLPVTCSRFYASHLETVGLLGRGWRLNWETSLRDDDEHITLTGVQGRELRYPKTMLTPGHQIFDPEEQLYLSRLHDGRYVLHYTDRSYYVFGDFDSDGMAYLLFMETPHRQRIVFGHEGGRLVRIASSSGHHLLLHRTQTPAGERLSRIELVQG…
A0A3Y5XNM2_SALET	RHS repeat protein (Fragment)	ZT98_24505	Salmonella enterica I	438	MYEAARVDDPIYHTSALAGFLIGAIIGIAIIALAAFAFFSCGFLAGLILGFMADQIASGVLQLGEAIGRSIHHTAGKILTGSENVSTNSRPAARAVLSTVKCDNHIAEKRIAQGSENIYINSQPAARKDDHTECDAVIEDGSPNVFLGGGTQTVLEISSEIPDWLRKVVDVLFVVASLLGGLAGAWRQAAKLGTKFGTKCAAKFIGGELTGMAVSEAISGLFSNPVDVTTGQKILLPETDFTLPGRLPVTCSRFYASHLETVGLLGRGWRLNWETSLREDDEHITLTGVQGRELRYPKTMLTPGHQIFDPKEQLYLSRLHDGRYVLHYTDRSYYVFGDFDSDGMAYLLFMETPHRQRIVFGHEGGRLVRIASSSGHHLLLHRTQTPAGERLSRIELVQG…
A0A3T5HC42_SALET	Type IV secretion protein Rhs (Fragment)	DLE90_17645	Salmonella enterica I	439	MYEAARVDDPIYHTSALAGFLIGAIIGIAIIALAAFAFFSCGFLAGLILGFMADQIASGVLQLGEAIGRSIHHTAGKILTGSENVSTNSRPAARAVLSTVKCDNHIAEKRIAQGSENIYINSQPAARKDDHTECDAVIEDGSPNVFLGGGTQTVLEISSEIPDWLRKVVDVLFVVASLLGGLAGAWRQAAKLGTKFGTKCAAKFIGGELVGMAVGEAISGLFSNPVDVTTGQKILLPETDFTLPGRLPVICSRFYASHLETVGLLGRGWRLNWETSLREDDEHITLTGVQGRELRYPKTMLTPGHQIFDPEEQLYLSRLHDGRYVLHYTDRSYYVFGDFDSDGMAYLLFMETPHRQRIVFGHEGGRLVRIASSSGHHLLLHRTQTPAGERLSRIELVQG…
A0A3Y7T1Q1_SALAN	RHS repeat protein (Fragment)	XU02_24560	Salmonella anatum	440	MYEAARVDDPIYHTSALAGFLIGAIIGIAIIALAAFAFFSCGFLAGLILGFMADQIASGVLQLGEAIGRSIHHTAGKILTGSENVSTNSRPAARAVLSTVKCDNHIAEKRIAQGSENIYINSQPAARKDDHTECDAVIEDGSPNVFLGGGTQTVLEISSEIPDWLRKVVDVLFVVASLLGGLAGAWRQAAKLGTKFGTKCAAKFIGGELVGMAVGEAISGLFSNPVDVTTGQKILLPETDFTLPGRLPVTCSRFYASHLETVGLLGRGWRLNWETSLREDDEHITLTGVQGRELRYPKTMLTPGHQIFDPEEQLYLSRLHDGRYVLHYTDRSYYVFGDFDSDGMAYLLFMETPHRQRIVFGHEGGRLVRIASSSGHHLLLHRTQTPAGERLSRVELVQG…
A0A3Y2DXZ8_SALET	RHS repeat protein (Fragment)	ZA51_22885	Salmonella enterica I	440	MYEAARVDDPIYHTSALAGFLIGAIIGIAIIALAAFAFFSCGFLAGLILGFMADQIASGVLQLGEAIGRSNHHTAGKILTGSENVSTNSRPAARAVLSTVKCDNHIAEKRIAQGSENIYINSQPAARKDDHTECDAVIEDGSPNVFLGGGTQTVLEISSEIPDWLRKVVDVLFVVASLLGGLAGAWRQAAKLGTKFGTKCAAKFIGGELVGMAVGEAISGLFSNPVDVTTGQKILLPETDFTLPGRLPVTCSRFYASHLETVGLLGRGWRLNWETSLREDDEHITLTGVQGRELRYPKTMLTPGHQIFDPEEQLYLSRLHDGRYVLHYTDRSYYVFGDFDSDGMAYLLFMETPHRQRIVFGHEGGRLVRIASSSGHHLLLHRTQTPAGERLSRIELVQG…
A0A3Y1J513_SALET	RHS repeat protein (Fragment)	ABL22_24035 AU735_22705 AVC45_23350	Salmonella enterica subsp. enterica serovar Braenderup	440	MYEAARVDDPIYHTSALAGFLIGAIIGIAIIALAAFAFFSCGFLAGLILGFMADQIASGVLQLGEAIGRSIHHTAGKILTGSENVSTNSRPAARAVLSTVKCDNHIAEKRIAQGSENIYINSQPAARKDDHTECDAVIEDGSPNVFLGGGTQTVLEISSEIPDWLRKVVDVLFVVASLLGGLAGAWRQAAKLGTKFGTKCAAKFIGGELTGMAVSEAISGLFSNPVDVTTGQKILLPETDFTLPGRLPVTCSRFYASHLETVGLLGRGWRLNWETSLRDDDEHITLTGVQGRELRYPKTMLTPGHQIFDPEEQLYLSRLHDGRYVLHYTDRSYYVFGDFDSDGMAYLLFMETPHRQRIVFGHEGGRLVRIASSSGHHLLLHRTQTPAGERLSRIELVQG…
A0A3Z7P9D3_SALET	Uncharacterized protein (Fragment)	AVA53_22645	Salmonella enterica I	171	MYEAARVDDPVYHTSALAGFLIGAIIGIAIIALAAFALFTCGFLAGLVLGFLADQIASGVLQLGEAIGRSIHHTAGKILTGSENVSTNSRPAARAVLSTVKCDNHIAEKRIAQGSENIYINSQPAARKDDHTECDAVIEDGSPNVFLGGGTQTVLEISSEIPDWLRKVVDV
G5PYI9_SALMO	Rhs-family protein (Fragment)	LTSEMON_0474	Salmonella enterica subsp. enterica serovar Montevideo str. S5-403	458	MYEAARVDDPIYHTSALAGFLIGAIIGIAIIALAAFAFFSCGFLAGLILGFMADQIASGVLQLGEAIGRSIHHTAGKILTGSENVSTNSRPAARAVLSTVKCDNHIAEKRIAQGSENIYINSQPAARKDDHTECDAVIEGGSPNVFLGGGTQTVLEISSEIPDWLRKVVDVLFVVASLLGGLAGAWRQAAKLGTKFGTKCAAKFIGGELAGMAVGEAISGLFSNPVDVTTGQKILLPETDFTLPGRLPVTCSRFYASHLETVGLLGRGWRLNWETSLREDDEHITLTGVQGRELCYPKTMLTPGHQIFDPEEQLYLSRLHDGRYVLHYTDRSYYVFGDFDSDGMAYLLFMETPHRQRIVFGHEGGRLVRIASSSGHHLLLHRTQTPAGERLSRIELVQG…
G5QV62_SALSE	Rhs-family protein (Fragment)	LTSESEN_0518	Salmonella enterica subsp. enterica serovar Senftenberg str. A4-543	459	MYEAARVDDPIYHTSALAGFLIGAIIGIAIIALAAFAFFSCGFLAGLILGFMADQIASGVLQLGEAIGRSIHHTAGKILTGSENVSTNSRPAARAVLSTVKCDNHIAEKRIAQGSENIYINSQPAARKDDHTECDAVIEDGSPNVFLGGGTQTVLEISSEIPDWLRKVVDVLFVVASLLGGLAGAWRQSAKLGTKFGTKCAAKFIGGELVGMAVGEAISGLFSNPVDVTTGQKILLPETDFTLPGRLPVTCSRFYASHLETVGLLGRGWRLNWETSLREDDEHITLTGVQGRELRYPKTMLTPGHQIFDPEEQLYLSRLHDGRYVLHYTDRSYYVFGDFDSDGMAYLLFMETPHRQRIVFGHEGGRLVRIASSSGHHLLLHRTQTPAGERLSRIELVQG…
G5QDW8_SALRU	Putative RHS-family protein (Fragment)	LTSERUB_0434	Salmonella enterica subsp. enterica serovar Rubislaw str. A4-653	468	MYEAARVDDPIYHTSALAGFLIGAIIGIAIIALAAFAFFSCGFLAGLILGFMADQIASGVLQLGEAIGRSIHHTAGKILTGSENVSTNSRPAARAVLSTVKCDNHIAEKRIAQGSENIYINSQPAARKDDHTECDAVIEDGSPNVFLGGGTQTVLEISSEIPDWLRKVVDVLFVVASLLGGLAGAWRQAAKLGTKFGTKCAAKFIGGELAGMAVGEAISGLFSNPVDVTTGQKILLPETDFTLPGRLPVTCSRFYASHLETVGLLGRGWRLNWETSLREDDEHITLTGVQGRELCYPKTMLTPGHQIFDPEEQLYLSRLHDGRYVLHYTDRSYYVFGDFDSDGMAYLLFMETPHRQRIVFGHEGGRLVRIASSSGHHLLLHRTQTPAGERLSRIELVQG…
A0A3T6GWC4_SALET	Uncharacterized protein	DL135_21600	Salmonella enterica I	559	MYEAARVDDPIYHTSALAGFLIGAIIGIAIIALAAFAFFSCGFLAGLILGFMADQIASGVLQLGEAIGRSIHHTAGKILTGSENVSTNSRPAARAVLSTVKCDNHIAEKRIAQGSENIYINSQPAARKDDHTECDAVIEDGSPNVFLGGGTQTVLEISSEIPDWLRKVVDVLFVVASLLGGLAGAWRQAAKLGTKFGTKCAAKFIGGELVGMAVGEAISGLFSNPVDVTTGQKILLPETDFTLPGRLPVTCSRFYASHLETVGLLGRGWRLNWETSLRDDDEHITLTGVQGRELRYPKTMLTPGHQIFDPEEQLYLSRLHDGRYVLHYTDRSYYVFGDFDSDGMAYLLFMETPHCQRIVFGHEGGRLVRIASSSGHHLLLHRTQTPAGERLSRIELVQG…
A0A3X8LAJ5_SALER	RHS repeat protein (Fragment)	D5U12_20770	Salmonella enterica (Salmonella choleraesuis)	591	MYEAARVDDPIYHTSALAGFLIGAIIGIAIIALAAFAFFSCGFLAGLILGFMADQIASGVLQLGEAIGRSIHHTAGKILTGSENVSTNSRPAARAVLSTVKCDNHIAEKRIAQGSENIYINSQPAARKDDHTECDAVIEDGSPNVFLGGGTQTVLEISSEIPDWLRKVVDVLFVVASLLGGLAGAWRQAAKLGTKFGTKCAAKFIGGELTGMAVSEAISGLFSNPVDVTTGQKILLPETDFTLPGRLPVTCSRFYASHLETVGLLGRGWRLNWETSLREDDEHITLTGVQGRELRYPKTMLTPGHQIFDPKEQLYLSRLHDGRYVLHYTDRSYYVFGDFDSDGMAYLLFMETPHRQRIVFGHEGGRLVRIASSSGHHLLLHRTQTPAGERLSRIELVQG…
A0A3W7LEY4_SALER	RHS repeat protein (Fragment)	D7G46_21885 D7I53_22765 D8Q02_23045 D9804_22905	Salmonella enterica (Salmonella choleraesuis)	593	MYEAARVDDPIYHTSALAGFLIGAIIGIAIIALAAFAFFSCGFLAGLILGFMADQIASGVLQLGEAIGRSIHHTAGKILTGSENVSTNSRPAARAVLSTVKCDNHIAEKRIAQGSENIYINSQPAARKDDHTECDAVIEDGSPNVFLGGGTQTVLEISSEIPDWLRKVVDVLFVVASLLGGLAGAWRQAAKLGTKFGTKCAAKFIGGELTGMAVSEAISGLFSNPVDVTTGQKILLPETDFTLPGRLPVTCSRFYASHLETVGLLGRGWRLNWETSLREDDEHITLTGVQGRELRYPKTMLTPGHQIFDPKEQLYLSRLHDGRYVLHYTDRSYYVFGDFDSDGMAYLLFMETPHRQRIVFGHEGGRLVRIASSSGHHLLLHRTQTPAGERLSRIELVQG…
A0A3K3RP58_ECOLX	RHS repeat protein (Fragment)	D9I20_24440	Escherichia coli	802	MYEAARVDDPIYHTSALAGFLIGAIIGIAIIAVAAFAFFTCGFFAGLVLGFLADQIASGVLQLGEAIGRSIHSTAGKILTGSPNVSTNSRPAARAVLSTVICEDHSPEIRIAQGSGNIYINSQPAARKDDHTECDAVIEDGSPNVFLGGGTQTVLAISPEIPDWLRQVVDVLFVVASLLGGLAGAWRQAAKLGSKFGTKCAAKFIGGQLVGMGVSEAVMGLFCNPVDVTTGQKILLPETDFTLPGRLPVTCSRFYASHLETEGLLGRGWRLNWEITLREDETYITFIGVQGRELSYPKAMLTPGHQIFDPEEQFYLSRLHDGRYVLHYTDRSYYVFDEFDDHGVAPLRFMETPYRQRIAFGRENGRLVRVASSSGHHLLLHRTMTPAGERLSHIELVKG…
A0A3V6IZA9_SALER	RHS repeat protein (Fragment)	BSX00_23435	Salmonella enterica (Salmonella choleraesuis)	604	MYEAARVDDPIYHTSALAGFLIGAIIGIAIIALAAFAFFSCGFLAGLILGFMADQIASGVLQLGEAIGRSIHHTAGKILTGSENVSTNSRPAARAVLSTVKCDNHIAEKRIAQGSENIYINSQPAARKDDHTECDAVIEDGSPNVFLGGGTQTVLEISSEIPDWLRKVVDVLFVVASLLGGLAGAWRQAAKLGTKFGTKCAAKFIGGELTGMAVSEAISGLFSNPVDVTTGQKILLPETDFTLPGRLPVTCSRFYASHLETVGLLGRGWRLNWETSLREDDEHITLTGVQGRELRYPKTMLTPGHQIFDPKEQLYLSRLHDGRYVLHYTDRSYYVFGDFDSDGMAYLLFMETPHRQRIVFGHEGGRLVRIASSSGHHLLLHRTQTPAGERLSRIELVQG…
F4VAY2_ECOLX	Putative RHS protein (Fragment)	ECPG_03364	Escherichia coli H591	1126	MSEGPGGPQGATAGGTLAMRMLSQQAMVASQMKRAANDKAIAQMLASKKSGPPAARLGDEIQHKSFLGALAGAVLGAIVTIAEGCLIMAACATGPYALVLVPALMYASYKASDYVEEKQNQLESWINSFCDTDGAINTGSENVKINGKPAARAAVTLPPPPPPGAIPEVPQGEPSWGDIATDLLESAAEKAVPLAKAWGNAVITLTDSNAGFMDRVSAGASLLFPAGPVLMEFATMVGGRGEIKKDVDFPEAGEDTALCDKENKPPRIAQGSSNVFINNQPAARQGDKLECSAAIVGGSPDVFIGGEQVTYLDIQPEFPPWQRMILGGITIASYLLPPAGLLGKLKNLARLGKLGNLLGKSGKLLGAKLGALLGKTGKSLKSIANKVIRWVTDPVDPVT…
A0A3V5AS85_SALER	Ntox47 domain-containing protein	CUJ95_14545	Salmonella enterica (Salmonella choleraesuis)	661	MYEAARVDDPIYHTSALAGFLIGAIIGIAIIALAAFAFFSCGFLAGLILGFMADQIASGVLQLGEAIGRSIHHTAGKILTGSENVSTNSRPAARAVLSTVKCDNHIAEKRIAQGSENIYINSQPAARKDDHTECDAVIEDGSPNVFLGGGTQTVLEISSEIPDWLRKVVDVLFVVASLLGGLAGAWRQAAKLGTKFGTKCAAKFIGGELVGMAVGEAISGLFSNPVDVTTGQKILLPETDFTLPGRLPVTCSRFYASHLETVGLLGRGWRLNWETSLREDDEHITLTGVQGRELCYLTGRSGQMYDHDRYYYDKAGNLLDNEGQGPVMNNRLPGCGRDRYGYNEWGELTTRRDQQLEWNAQGQLTRVISGNTETHYGYDALGRRTRKATYGRHTGHTAR…
A0A3T7UXD6_SALET	RHS repeat protein (Type IV secretion protein Rhs) (Fragment)	DK719_23450 DM358_23125 DNV11_22690 DUA52_23005	Salmonella enterica I	664	MYEAARVDDPIYHTSALAGFLIGAIIGIAIIALAAFAFFSCGFLAGLILGFMADQIASGVLQLGEAIGRSIHHTAGKILTGSENVSTNSRPAARAVLSTVKCDNHIAEKRIAQGSENIYINSQPAARKDDHTECDAVIEDGSPNVFLGGGTQTVLEISSEIPDWLRKVVDVLFVVASLLGGLAGAWRQAAKLGTKFGTKCAAKFIGGELAGMAVGEAISGLFSNPVDVTTGQKILLPETDFTLPGRLPVTCSRFYASHLETVGLLGRGWRLNWETSLREDDEHITLTGVQGRELCYPKTMLTPGHQIFDPKEQLYLSRLHDGRYVLHYTDRSYYVFGDFDSDGMAYLLFMETPHRQRIVFGHEGGRLVRIASSSGHHLLLHRTQTPAGERLSRIELVQG…
A0A3T4FEJ6_SALET	Type IV secretion protein Rhs (Fragment)	DK094_20920	Salmonella enterica I	665	MYEAARVDDPIYHTSALAGFLIGAIIGIAIIALAAFAFFSCGFLAGLILGFMADQIASGVLQLGEAIGRSIHHTAGKILTGSENVSTNSRPAARAVLSTVKCDNHIAEKRIAQGSENIYINSQPAARKDDHTECDAVIEDGSPNVFLGGGTQTVLEISSEIPDWLRKVVDVLFVVASLLGGLAGAWRQAAKLGTKFGTKCAAKFIGGELAGMAVGEAISGLFSNPVDVTTGQKILLPETDFTLPGRLPVTCSRFYASHLETVGLLGRGWRLNWETSLREDDEHITLTGVQGRELCYPKTMLTPGHQIFDPKEQLYLSRLHDGRYVLHYTDRSYYVFGDFDSDGMAYLLFMETPHRQRIVFGHEGGRLVRIASSSGHHLLLHRTQTPAGERLSRIELVQG…
A0A3V1R5N6_SALET	RHS repeat protein (Fragment)	DSA82_22385	Salmonella enterica I	666	MYEAARVDDPIYHTSALAGFLIGAIIGIAIIALAAFAFFSCGFLAGLILGFMADQIASGVLQLGEAIGRSIHHTAGKILTGSENVSTNSRPAARAVLSTVKCDNHIAEKRIAQGSENIYINSQPAARKDDHTECDAVIEDGSPNVFLGGGTQTVLEISSEIPDWLRKVVDVLFVVASLLGGLAGAWRQAAKLGTKFGTKCAAKFIGGELAGMAVGEAISGLFSNPVDVTTGQKILLPETDFTLPGRLPVTCSRFYASHLETVGLLGRGWRLNWETSLREDDEHITLTGVQGRELCYPKTMLTPGHQIFDPKEQLYLSRLHDGRYVLHYTDRSYYVFGDFDSDGMAYLLFMETPHRQRIVFGHEGGRLVRIASSSGHHLLLHRTQTPAGERLSRIELVQG…
A0A484XFI0_SALTM	Type IV secretion protein Rhs	NCTC13348_03012	Salmonella typhimurium	667	MYEAARVDDPIYHTSALAGFLIGAIIGIAIIALAAFAFFSCGFLAGLILGFMADQIASGVLQLGEAIGRSIHHTAGKILTGSENVSTNSRPAARAVLSTVKCDNHIAEKRIAQGSENIYINSQPAARKDDHTECDAVIEDGSPNVFLGGGTQTVLEISSEIPDWLRKVVDVLFVVASLLGGLAGAWRQAAKLGTKFGTKCAAKFIGGELVGMAVGEAISGLFSNPVDVTTGQKILLPETDFTLPGRLPVTCSRFYASHLETVGLLGRGWRLNWETSLRDDDEHITLTGVQGRELRYPKTMLTPGHQIFDPEEQLYLSRLHDGRYVLHYTDRSYYVFGDFDSDGMAYLLFMETPHRQRIVFGHEGGRLVRIASSSGHHLLLHRTQTPAGERLSRIELVQG…
A0A3V5XFL4_SALER	RHS repeat protein (Fragment)	UR04_16140	Salmonella enterica (Salmonella choleraesuis)	668	MYEAARVDDPIYHTSALAGFLIGAIIGIAIIALAAFAFFSCGFLAGLILGFMADQIASGVLQLGEAIGRSIHHTAGKILTGSENVSTNSRPAARAVLSTVKCDNHIAEKRIAQGSENIYINSQPAARKDDHTECDAVIEDGSPNVFLGGGTQTVLEISSEIPDWLRKVVDVLFVVASLLGGLAGAWRQAAKLGTKFGTKCAAKFIGGELAGMAVGEAISGLFSNPVDVTTGQKILLPETDFTLPGRLPVTCSRFYASHLETVGLLGRGWRLNWETSLREDDEHITLTGVQGRELCYPKTMLTPGHQIFDPEEQLYLSRLHDGRYVLHYTDRSYYVFGDFDSDGMAYLLFMETPHRQRIVFGHEGGRLVRIASSSGHHLLLHRTQTPAGERLSRIELVQG…
A0A3Z2ACH3_SALET	RHS repeat protein (Fragment)	D7N03_22745	Salmonella enterica I	670	MYEAARVDDPIYHTSALAGFLIGAIIGIAIIALAAFAFFSCGFLAGLILGFMADQIASGVLQLGEAIGRSIHHTAGKILTGSENVSTNSRPAARAVLSTVKCDNHIAEKRIAQGSENIYINSQPAARKDDHTECDAVIEDGSPNVFLGGGTQTVLEISSEIPDWLRKVVDVLFVVASLLGGLAGAWRQAAKLGTKFGTKCAAKFIGGELTGMAVSEAISGLFSNPVDVTTGQKILLPETDFTLPGRLPVTCSRFYASHLETVGLLGRGWRLNWETSLREDDEHITLTGVQGRELRYPKTMLTPGHQIFDPKEQLYLSRLHDGRYVLHYTDRSYYVFGDFDSDGMAYLLFMETPHRQRIVFGHEGGRLVRIASSSGHHLLLHRTQTPAGERLSRIELVQG…
A0A556XUK6_ECOLX	Type IV secretion protein Rhs (Fragment)	FPV20_26690	Escherichia coli O177	1190	MSEGPGGPQGATAGGTLAMRMLSQQAMVASQMKRAANDKAIAQMLASKKSGPPAARLGDEIQHKSFLGALAGAVLGAIVTIAEGCLIMAACATGPYALVLVPALMYASYKASDYVEEKQNQLESWINSFCDTDGAINTGSENVKINGKPAARAAVTLPPPPPPGAIPEVPQGEPSWGDIATDLLESAAEKAVPLAKAWGNAVITLTDSNAGFMDRVSAGASLLFPAGPVLMEFATMVGGRGEIKKDVDFPEAGEDTALCDKENKPPRIAQGSSNVFINNQPAARQGDKLECSAAIVGGSPDVFIGGEQVTYLDIQPEFPPWQRMILGGITIASYLLPPAGLLGKLKNLARLGKLGNLLGKSGKLLGAKLGALLGKTGKSLKSIANKVIRWVTDPVDPVT…
A0A3V9ZI37_SALET	RHS repeat protein (Type IV secretion protein Rhs) (Fragment)	DNM18_25940 R126_22225	Salmonella enterica I	688	MYEAARVDDPIYHTSALAGFLIGAIIGIAIIALAAFAFFSCGFLAGLILGFMADQIASGVLQLGEAIGRSIHHTAGKILTGSENVSTNSRPAARAVLSTVKCDNHIAEKRIAQGSENIYINSQPAARKDDHTECDAVIEDGSPNVFLGGGTQTVLEISSEIPDWLRKVVDVLFVVASLLGGLAGAWRQAAKLGTKFGTKCAAKFIGGELAGMAVGEAISGLFSNPVDVTTGQKILLPETDFTLPGRLPVTCSRFYASHLETVGLLGRGWRLNWETSLREDDEHITLTGVQGRELCYPKTMLTPGHQIFDPEEQLYLSRLHDGRYVLHYTDRSYYVFGDFDSDGMAYLLFMETPHRQRIVFGHEGGRLVRIASSSGHHLLLHRTQTPAGERLSRIELVQG…
A0A3U4EVS8_SALET	RHS repeat protein (Fragment)	DPC91_21670	Salmonella enterica I	691	MYEAARVDDPIYHTSALAGFLIGAIIGIAIIALAAFAFFSCGFLAGLILGFMADQIASGVLQLGEAIGRSIHHTAGKILTGSENVSTNSRPAARAVLSTVKCDNHIAEKRIAQGSENIYINSQPAARKDDHTECDAVIEDGSPNVFLGGGTQTVLEISSEIPDWLRKVVDVLFVVASLLGGLAGAWRQAAKLGTKFGTKCAAKFIGGELVGMAVGEAISGLFSNPVDVTTGQKILLPETDFTLPGRLPVTCSRFYASHLETVGLLGRGWRLNWETSLREDDEHITLTGVQGRELRYPKTMLTPGHQIFDPKEQLYLSRLHDGRYVLHYTDRSYYVFGDFDSDGMAYLLFMETPHRQRIVFGHEGGRLVRIASSSGHHLLLHRTQTPAGERLSRIELVQG…
A0A3Y2IZJ0_SALET	RHS repeat protein (Fragment)	D6S13_24465	Salmonella enterica I	698	MYEAARVDDPIYHTSALAGFLIGAIIGIAIIALAAFAFFSCGFLAGLILGFMADQIASGVLQLGEAIGRSIHHTAGKILTGSENVSTNSRPAARAVLSTVKCDNHIAEKRIAQGSENIYINSQPAARKDDHTECDAVIEDGSPNVFLGGGTQTVLEISSEIPDWLRKVVDVLFVVASLLGGLAGAWRQAAKLGTKFGTKCAAKFIGGELVGMAVGEAISGLFSNPVDVTTGQKILLPETDFTLPGRLPVTCSRFYASHLETVGLLGRGWRLNWETSLREDDEHITLTGVQGRELRYPKTMLTPGHQIFDPEEQLYLSRLHDGRYVLHYTDRSYYVFGDFDSDGMAYLLFMETPHRQRIVFGHEGGRLVRIASSSGHHLLLHRTQTPAGERLSRIELVQG…
A0A3Z1VBL6_SALTM	RHS repeat protein (Fragment)	AAK29_21380	Salmonella typhimurium	711	MYEAARVDDPIYHTSALAGFLIGAIIGIAIIALAAFAFFSCGFLAGLILGFMADQIASGVLQLGEAIGRSNHHTAGKILTGSENVSTNSRPAARAVLSTVKCDNHIAEKRIAQGSENIYINSQPAARKDDHTECDAVIEDGSPNVFLGGGTQTVLEISSEIPDWLRKVVDVLFVVASLLGGLAGAWRQAAKLGTKFGTKCAAKFIGGELVGMAVGEAISGLFSNPVDVTTGQKILLPETDFTLPGRLPVTCSRFYASHLETVGLLGRGWRLNWETSLREDDEHITLTGVQGRELRYPKTMLTPGHQIFDPEEQLYLSRLHDGRYVLHYTDRSYYVFGDFDSDGMAYLLFMETPHRQRIVFGHEGGRLVRIASSSGHHLLLHRTQTPAGERLSRIELVQG…
A0A3W5QLC0_SALER	RHS repeat protein (Fragment)	D8T94_25155	Salmonella enterica (Salmonella choleraesuis)	711	MYEAARVDDPIYHTSALAGFLIGAIIGIAIIALAAFAFFSCGFLAGLILGFMADQIASGVLQLGEAIGRSNHHTAGKILTGSENVSTNSRPAARAVLSTVKCDNHIAEKRIAQGSENIYINSQPAARKDDHTECDAVIEDGSPNVFLGGGTQTVLEISSEIPDWLRKVVDVLFVVASLLGGLAGAWRQAAKLGTKFGTKCAAKFIGGELVGMAVGEAISGLFSNPVDVTTGQKILLPETDFTLPGRLPVTCSRFYASHLETVGLLGRGWRLNWETSLREDDEHITLTGVQGRELRYPKTMLTPGHQIFDPEEQLYLSRLHDGRYVLHYTDRSYYVFGDFDSDGMAYLLFMETPHRQRIVFGHEGGRLVRIASSSGHHLLLHRTQTPAGERLSRIELVQG…
A0A3X6TJW7_SALER	RHS repeat protein (Fragment)	EH041_25140	Salmonella enterica (Salmonella choleraesuis)	712	MYEAARVDDPIYHTSALAGFLIGAIIGIAIIALAAFAFFSCGFLAGLILGFMADQIASGVLQLGEAIGRSNHHTAGKILTGSENVSTNSRPAARAVLSTVKCDNHIAEKRIAQGSENIYINSQPAARKDDHTECDAVIEDGSPNVFLGGGTQTVLEISSEIPDWLRKVVDVLFVVASLLGGLAGAWRQAAKLGTKFGTKCAAKFIGGELVGMAVGEAISGLFSNPVDVTTGQKILLPETDFTLPGRLPVTCSRFYASHLETVGLLGRGWRLNWETSLREDDEHITLTGVQGRELRYPKTMLTPGHQIFDPEEQLYLSRLHDGRYVLHYTDRSYYVFGDFDSDGMAYLLFMETPHRQRIVFGHEGGRLVRIASSSGHHLLLHRTQTPAGERLSRIELVQG…
A0A3X1KPB4_SALER	RHS repeat protein (Fragment)	EG180_22730	Salmonella enterica (Salmonella choleraesuis)	718	MYEAARVDDPIYHTSALAGFLIGAIIGIAIIALAAFAFFSCGFLAGLILGFMADQIASGVLQLGEAIGRSIHHTAGKILTGSENVSTNSRPAARAVLSTVKCDNHIAEKRIAQGSENIYINSQPAARKDDHTECDAVIEGGSPNVFLGGGTQTVLEISSEIPDWLRKVVDVLFVVASLLGGLAGAWRQAAKLGTKFGTKCAAKFIGGELAGMAVGEAISGLFSNPVDVTTGQKILLPETDFTLPGRLPVTCSRFYASHLETVGLLGRGWRLNWETSLREDDEHITLTGVQGRELCYPKTMLTPGHQIFDPEEQLYLSRLHDGRYVLHYTDRSYYVFGDFDSDGMAYLLFMETPHRQRIVFGHEGGRLVRIASSSGHHLLLHRTQTPAGERLSRIELVQG…
A0A0P9SX85_9PSED	Rhs family protein with PAAR motif (Fragment)	ALO69_04659	Pseudomonas ficuserectae	60	MFEAARFGDEISHTGALGGFLIGAVLGIALIATVAIATFTCGFGVALLAGLAAGVGGSLL
A0A2H4TP91_ECOLX	YD repeat (Two copies)	CV83915_01025	Escherichia coli	458	MSEGPGGPQGATAGGTLAMRMLSQQAMVASQMKRAANDKAIAQMLASKKSGPPAARLGDEIQHKSFLGALAGAVLGAIVTIEEGCLIMAACATGPYALVLVPALMYASYKASDYVEEKQNQLESWINSFCDTDGAINTGSENVNINGKPAARAAVTLPPPPPPGAIPEIPQGEPSWGDIATDLLESAAEKAVPLAKAWGNAVITLTDSNAGFMDRVSAGASLLFPAGPVLMEFATMVGGRGEIKKDVDFPEAGEDTALCDKENKPPRIAQGSSNVFINNQPAARKGDKLECSAAIVGGSPDVFIGGEQVTYLDIQPEFPPWQRMILGGITIASYLLPPAGLLGKLKNLARLGKLGNLLGKSGKLLGAKLGALLSRTKNALKNTYNVLKKFIKDPVDPVT…
A0A3W7RD15_SALER	RHS repeat protein (Fragment)	D8U13_23035	Salmonella enterica (Salmonella choleraesuis)	730	MYEAARVDDPIYHTSALAGFLIGAIIGIAIIALAAFAFFSCGFLAGLILGFMADQIASGVLQLGEAIGRSIHHTAGKILTGSENVSTNSRPAARAVLSTVKCDNHIAEKRIAQGSENIYINSQPAARKDDHTECDAVIEGGSPNVFLGGGTQTVLEISSEIPDWLRKVVDVLFVVASLLGGLAGAWRQAAKLGTKFGTKCAAKFIGGELAGMAVGEAISGLFSNPVDVTTGQKILLPETDFTLPGRLPVTCSRFYASHLETVGLLGRGWRLNWETSLREDDEHITLTGVQGRELCYPKTMLTPGHQIFDPEEQLYLSRLHDGRYVLHYTDRSYYVFGDFDSDGMAYLLFMETPHRQRIVFGHEGGRLVRIASSSGHHLLLHRTQTPAGERLSRIELVQG…
A0A3U7K2J0_SALET	RHS repeat protein (Fragment)	DP881_23300	Salmonella enterica subsp. enterica serovar Give	771	MYEAARVDDPIYHTSALAGFLIGAIIGIAIIALAAFAFFSCGFLAGLILGFMADQIASGVLQLGEAIGRSIHHTAGKILTGSENVSTNSRPAARAVLSTVKCDNHIAEKRIAQGSENIYINSQPAARKDDHTECDAVIEDGSPNVFLGGGTQTVLEISSEIPDWLRKVVDVLFVVASLLGGLAGAWRQAAKLGTKFGTKCAAKFIGGELAGMAVGEAISGLFSNPVDVTTGQKILLPETDFTLPGRLPVTCSRFYASHLETVGLLGRGWRLNWETSLREDDEHITLTGVQGRELCYPKTMLTPGHQIFDPKEQLYLSRLHDGRYVLHYTDRSYYVFGDFDSDGMAYLLFMETPHRQRIVFGHEGGRLVRIASSSGHHLLLHRTQTPAGERLSRIELVQG…
A0A3U1SPR0_SALET	RHS repeat protein (Fragment)	DN257_15990	Salmonella enterica I	772	MYEAARVDDPIYHTSALAGFLIGAIIGIAIIALAAFAFFSCGFLAGLILGFMADQIASGVLQLGEAIGRSIHHTAGKILTGSENVSTNSRPAARAVLSTVKCDNHIAEKRIAQGSENIYINSQPAARKDDHTECDAVIEDGSPNVFLGGGTQTVLEISSEIPDWLRKVVDVLFVVASLLGGLAGAWRQAAKLGTKFGTKCAAKFIGGELAGMAVGEAISGLFSNPVDVTTGQKILLPETDFTLPGRLPVTCSRFYASHLETVGLLGRGWRLNWETSLREDDEHITLTGVQGRELCYPKTMLTPGHQIFDPKEQLYLSRLHDGRYVLHYTDRSYYVFGDFDSDGMAYLLFMETPHRQRIVFGHEGGRLVRIASSSGHHLLLHRTQTPAGERLSRIELVQG…
A0A3Z9FMY0_ECOLX	Type IV secretion protein Rhs (Fragment)	D9H35_18605	Escherichia coli	688	MSEGPGGPQGATAGGTLAMRMLSQQAMVASQMKRAANDKAIAQMLAAKKSGPPAARLGDEIQHKSFLGALAGAVLGAIVTIAEGCLIMAACATGPYALVLVPALMYASYKASDYVEEKQNQLESWINSFCDTDGAINTGSENVNINGKPAARAAVTLPPPPPPGAIPEVPQGEPSWGDIATDLLESAAEKAVPLAKAWGNAVITLTDSNAGFMDRLCAGTSLLFPAGPVLMEFATMVGGRGEIKKDVDFPEAGEDTALCDKENKPPRIAQGSSNVFINNQPAARKGDKLECSAAIVEGSPDVFIGGEQVTYLDIQPEFPPWQRMILGGITIASYLLPPAGLLGKLKNLARLGKLGNLLGKSGKLLGAKLGALLSRTKNALKNTYNVLKKFIKDPVDPVT…
A0A3Y3PEM5_SALET	RHS repeat protein (Fragment)	D8R18_23625	Salmonella enterica I	788	MYEAARVDDPIYHTSALAGFLIGAIIGIAIIALAAFAFFSCGFLAGLILGFMADQIASGVLQLGEAIGRSIHHTAGKILTGSENVSTNSRPAARAVLSTVKCDNHIAEKRIAQGSENIYINSQPAARKDDHTECDAVIEDGSPNVFLGGGTQTVLEISSEIPDWLRKVVDVLFVVASLLGGLAGAWRQAAKLGTKFGTKCAAKFIGGELAGMAVGEAISGLFSNPVDVTTGQKILLPETDFTLPGRLPVTCSRFYASHLETVGLLGRGWRLNWETSLREDDEHITLTGVQGRELCYPKTMLTPGHQIFDPKEQLYLSRLHDGRYVLHYTDRSYYVFGDFDSDGMAYLLFMETPHRQRIVFGHEGGRLVRIASSSGHHLLLHRTQTPAGERLSRIELVQG…
A0A3V7ZTM1_SALER	RHS repeat protein (Fragment)	CBJ10_22790	Salmonella enterica (Salmonella choleraesuis)	797	MYEAARVDDPIYHTSALAGFLIGAIIGIAIIALAAFAFFSCGFLAGLILGFMADQIASGVLQLGEAIGRSIHHTAGKILTGSENVSTNSRPAARAVLSTVKCDNHIAEKRIAQGSENIYINSQPAARKDDHTECDAVIEDGSPNVFLGGGTQTVLEISSEIPDWLRKVVDVLFVVASLLGGLAGAWRQAAKLGTKFGTKCAAKFIGGELVGMAVGEAISGLFSNPVDVTTGQKILLPETDFTLPGRLPVTCSRFYASHLETVGLLGRGWRLNWETSLREDDEHITLTGVQGRELRYPKTMLTPGHQIFDPEEQLYLSRLHDGRYVLHYTDRSYYVFGDFDSDGMAYLLFMETPHRQRIVFGHEGGRLVRIASSSGHHLLLHRTQTPAGERLSRIELVQG…
A0A3Z6W2G7_SALET	RHS repeat protein (Fragment)	E1854_21520 ZA38_22295	Salmonella enterica subsp. enterica serovar Livingstone	797	MYEAARVDDPIYHTSALAGFLIGAIIGIAIIALAAFAFFSCGFLAGLILGFMADQIASGVLQLGEAIGRSIHHTAGKILTGSENVSTNSRPAARAVLSTVKCDNHIAEKRIAQGSENIYINSQPAARKDDHTECDAVIEDGSPNVFLGGGTQTVLEISSEIPDWLRKVVDVLFVVASLLGGLAGAWRQAAKLGTKFGTKCAAKFIGGELVGMAVGEAISGLFSNPVDVTTGQKILLPETDFTLPGRLPVTCSRFYASHLETVGLLGRGWRLNWETSLREDDEHITLTGVQGRELRYPKTMLTPGHQIFDPEEQLYLSRLHDGRYVLHYTDRSYYVFGDFDSDGMAYLLFMETPHRQRIVFGHEGGRLVRIASSSGHHLLLHRTQTPAGERLSRIELVQG…
A0A177RIA6_RALSL	YD repeat (Two copies) (Fragment)	RSP795_17615	Ralstonia solanacearum (Pseudomonas solanacearum)	496	MFEAARVTDPIEHTSALTGFLIGAVLGVALIAAVAFATFTCGFGVALLAGLAAGVGASAILGLGEAIGKSRWFTSTTGTILTGSTNVFVNGKLAAFATASTVACSKHSPVPLIAQGSGGVFINSKPAARKGDKITCGAAVADGSSNVFMGGGTQTYLPYDDEVPPWLRTTVDWAFALAGLVGGLAGLVKAAGGLSRAVLPCAAKFIGGYVIGEAVGRYVAAPVVSRVMGGLFGHPVDVTTGRKVLLADDETDAVVPSPMPLVCRRFYASNLDRAGTLGRGWVLPWDLRLHRRDGRLWYTDAQGRESGFPLVAPGQMVFSDTEQRYLTCTPDGRYILHDLSETYYDFGRLDAEGDGVAWVRRIEDQAGQWQDYARDGEGRVREILTSGGVRVALDYEPLH…
A0A3U2PNN3_SALET	RHS repeat protein (Fragment)	DOB60_26250	Salmonella enterica I	825	MYEAARVDDPIYHTSALAGFLIGAIIGIAIIALAAFAFFSCGFLAGLILGFMADQIASGVLQLGEAIGRSNHHTAGKILTGSENVSTNSRPAARAVLSTVKCDNHIAEKRIAQGSENIYINSQPAARKDDHTECDAVIEDGSPNVFLGGGTQTVLEISSEIPDWLRKVVDVLFVVASLLGGLAGAWRQAAKLGTKFGTKCAAKFIGGELVGMAVGEAISGLFSNPVDVTTGQKILLPETDFTLPGRLPVTCSRFYASHLETVGLLGRGWRLNWETSLREDDEHITLTGVQGRELRYPKTMLTPGHQIFDPEEQLYLSRLHDGRYVLHYTDRSYYVFGDFDSDGMAYLLFMETPHRQRIVFGHEGGRLVRIASSSGHHLLLHRTQTPAGERLSRIELVQG…
A0A3V7YMS8_SALER	RHS repeat protein (Fragment)	AMC10_20025	Salmonella enterica (Salmonella choleraesuis)	788	MYEAARVDDPIYHTSALAGFLIGAIIGIAIIALAAFAFFSCGFLAGLILGFMAYQIASGVLQLGEAIGRSIHHTAGKILTGSENVSTNSRPAARAVLSTVKCDNHIAEKRIAQGSENIYINSQPAARKDDHTECDAVIEDGSPNVFLGGGTQTVLEISSEIPDWLRKVVDVLFVVASLLGGLAGAWRQAAKLGTKFGTKCAAKFIGGELAGMAVGEAISGLFSNPVDVTTGQKILLPETDFTLPGRLPVTCSRFYASHLETVGLLGRGWRLNWETSLREDDEHITLTGVQGRELCYPKTMLTPGHQIFDPKEQLYLSRLHDGRYVLHYTDRSYYVFGDFDSDGMAYLLFMETPHRQRIVFGHEGGRLVRIASSSGHHLLLHRTQTPAGERLSRIELVQG…
A0A3V4FRN4_SALET	RHS repeat protein (Fragment)	C2303_24715	Salmonella enterica subsp. enterica serovar Heidelberg	849	MYEAARVDDPIYHTSALAGFLIGAIIGIAIIALAAFAFFSCGFLAGLILGFMADQIASGVLQLGEAIGRSIHHTAGKILTGSENVSTNSRPAARAVLSTVKCDNHIAEKRIAQGSENIYINSQPAARKDDHTECDAVIEDGSPNVFLGGGTQTVLEISSEIPDWLRKVVDVLFVVASLLGGLAGAWRQAAKLGTKFGTKCAAKFIGGELVGMAVGEAISGLFSNPVDVTTGQKILLPETDFTLPGRLPVTCSRFYASHLETVGLLGRGWRLNWETSLREDDEHITLTGVQGRELRYPKTMLTPGHQIFDPEEQLYLSRLHDGRYVLHYTDRSYYVFGDFDSDGMAYLLFMETPHRQRIVFGHEGGRLVRIASSSGHHLLLHRTQTPAGERLSRIELVQG…
A0A2T3U5Z8_9ESCH	Type IV secretion protein Rhs	C7B04_04335	Escherichia sp. 4726-5	1387	MYEAARVDDPIYHTSALAGFLIGAVIGIAIIAVAAFAFFTCGFLAGLILGFLADQIASGVLQLGEAIGRSIHSTAGKILTGSPNVSTNSRPAARAVLSTVICEDHSPEIRIAQGSGNIYINSQPAARKDDHTECDAVIEDGSPNVFLGGGTQTVLEISPEIPDWLRQVVDVLFVVAGMLGGLAGAWRQAAKLGSKFGTKCAAKFIGGEITGMAVSEAAMGLFSNPVDVTTGQKILLPETDFTLPGRLPVTCSRFYASHLETEGVLGRGWRLNWEINLREDEAYITFIGVQGRELSYPKEMLTPGHQIFDPEEQFYLSRLHDGRYVLHYTDRSYYVFDEFDDHGVAPLLFMETPHRQRIAFGRENGRLVRVASSSGHHLLLHRTLTPAGERLSHIELVKG…
S0TQ03_9ESCH	YD repeat (Two copies)	WC5_02150	Escherichia sp. KTE114	1387	MYEAARVDDPIYHTSALAGFLIGAVIGIAIIAVAAFAFFTCGFLAGLILGFLADQIASGVLQLGEAIGRSIHSTAGKILTGSPNVSTNSRPAARAVLSTVICEDHSPEIRIAQGSGNIYINSQPAARKDDHTECDAVIEDGSPNVFLGGGTQTVLEISPEIPDWLRQVVDVLFVVAGMLGGLAGAWRQAAKLGSKFGTKCAAKFIGGEITGMAVSEAAMGLFSNPVDVTTGQKILLPETDFTLPGRLPVTCSRFYASHLETEGVLGRGWRLNWEINLREDEAYITFIGVQGRELSYPKEMLTPGHQIFDPEEQFYLSRLHDGRYVLHYTDRSYYVFDEFDDHGVAPLLFMETPHRQRIAFGRENGRLVRVASSSGHHLLLHRTLTPAGERLSHIELVKG…
A0A3V3CMH2_SALET	RHS repeat protein (Fragment)	AHY24_24560	Salmonella enterica subsp. enterica serovar Havana	864	MYEAARVDDPIYHTSALAGFLIGAIIGIAIIALAAFAFFSCGFLAGLILGFMADQIASGVLQLGEAIGRSNHHTAGKILTGSENVSTNSRPAARAVLSTVKCDNHIAEKRIAQGSENIYINSQPAARKDDHTECDAVIEDGSPNVFLGGGTQTVLEISSEIPDWLRKVVDVLFVVASLLGGLAGAWRQAAKLGTKFGTKCAAKFIGGELVGMAVGEAISGLFSNPVDVTTGQKILLPETDFTLPGRLPVTCSRFYASHLETVGLLGRGWRLNWETSLREDDEHITLTGVQGRELRYPKTMLTPGHQIFDPEEQLYLSRLHDGRYVLHYTDRSYYVFGDFDSDGMAYLLFMETPHRQRIVFGHEGGRLVRIASSSGHHLLLHRTQTPAGERLSRIELVQG…
A0A3Z7TVJ6_SALET	RHS repeat protein (Fragment)	D7N51_24420	Salmonella enterica I	868	MYEAARVDDPIYHTSALAGFLIGAIIGIAIIALAAFAFFSCGFLAGLILGFMADQIASGVLQLGEAIGRSIHHTAGKILTGSENVSTNSRPAARAVLSTVKCDNHIAEKRIAQGSGNIYINSQPAARKDDHTECDAVIEDGSPNVFLGGGTQTVLEISSEIPDWLRKVVDVLFVVASLLGGLAGAWRQAAKLGTKFGTKCAAKFIGGELVGMAVGEAISGLFSNPVDVTTGQKILLPETDFTLPGRLPVTCSRFYASHLETVGLLGRGWRLNWETSLREDDEHITLTGVQGRELRYPKTMLTPGHQIFDPEEQLYLSRLHDGRYVLHYTDRSYYVFGDFDSDGMAYLLFMETPHRQRIVFGHEGGRLVRIASSSGHHLLLHRTQTPAGERLSRIELVQG…
A0A3W6QKM0_SALER	RHS repeat protein (Fragment)	EHA18_24170	Salmonella enterica (Salmonella choleraesuis)	877	MYEAARVDDPIYHTSALAGFLIGAIIGIAIIALAAFAFFSCGFLAGLILGFMADQIASGVLQLGEAIGRSIHHTAGKILTGSENVSTNSRPAARAVLSTVKCDNHIAEKRIAQGSENIYINSQPAARKDDHTECDAVIEDGSPNVFLGGGTQTVLEISSEIPDWLRKVVDVLFVVASLLGGLAGAWRQAAKLGTKFGTKCAAKFIGGELTGMAVSEAISGLFSNPVDVTTGQKILLPETDFTLPGRLPVTCSRFYASHLETVGLLGRGWRLNWETSLREDDEHITLTGVQGRELRYPKTMLTPGHQIFDPKEQLYLSRLHDGRYVLHYTDRSYYVFGDFDSDGMAYLLFMETPHRQRIVFGHEGGRLVRIASSSGHHLLLHRTQTPAGERLSRIELVQG…
A0A4Q9CB16_ECOLX	Type IV secretion protein Rhs (Fragment)	EYY78_22085	Escherichia coli	1349	MSEGPGGPQGATAGGTLAMRMLSQQAMVASQMKRAANDKAIAQMLASKKSGPPAARLGDEIQHKSFLGALAGAVLGAIVTIAEGCLIMAACATGPYALVLVPALMYASYKASDYVEEKQNQLESWINSFCDTDGAINTGSENVKINGKPAARAAVTLPPPPPPGAIPEVPQGEPSWGDIATDLLESAAEKAVPLAKAWGNAVITLTDSNAGFMDRVSAGASLLFPAGPVLMEFATMVGGRGEIKKDVDFPEAGEDTALCDKENKPPRIAQGSSNVFINNQPAARQGDKLECSAAIVGGSPDVFIGGEQVTYLDIQPEFPPWQRMILGGITIASYLLPPAGLLGKLKNLARLGKLGNLLGKSGKLLGAKLGALLGKTGKSLKSIANKVIRWVTDPVDPVT…
A0A1Y5KXE4_PSEPU	Uncharacterized protein (Fragment)	CBP06_08690	Pseudomonas putida (Arthrobacter siderocapsulatus)	61	MFEAARFGDEIAHTSALGGFLIGAALGIALVATVAIATFTCGFGVALLAGLAAGIGGSLLT
A0A104YZY9_9BURK	Uncharacterized protein	WJ87_00640	Burkholderia ubonensis	1413	MFEAARVTDPIEHTSALAGFLIGAVIGVALIAAVAFATFTCGFGVALLAGLVAGVGASAILSLGEAIGKMFSSPSGAIVTGSANVFINGKPAAYATLSGTACDKHNPVPLVAQGSTNVFINGRPAARKDDKITCGAAIGDGSHDTFIHGGTETYLPVDDEVPPWLRTTVDWAFALAGLVGGLAGLVKAAGGLSRAVLPCAAKFIGGFVLGEAVGRYVAGPAINRAIGGMFGNPVDVTTGRKILLAESETDYVIPAPLPVAIKRFYSSGLDHVGTLGRGWVLPWDLRLQARDGRLWYTDAQGRESGFPLVRNGQSSFSESEQRYLTCTPDGRYVLHDVGETYYDFGRLDPDTDRIAWVRRIEDQAGQWTQFERDSQGRVREILTCGGIQAVLDYEAVHGR…
A0A125JW99_9BURK	Uncharacterized protein	WM15_22225	Burkholderia ubonensis	1413	MFEAARVTDPIEHTSALAGFLIGAVIGVALIAAVAFATFTCGFGVALLAGLVAGVGASAILSLGEAIGKMFSSPSGAIVTGSANVFINGKPAAYATLSGTACDKHNPVPLVAQGSTNVFINGRPAARKDDKITCGAAIGDGSHDTFIHGGTETYLPVDDEVPPWLRTTVDWAFALAGLVGGLAGLVKAAGGLSRAVLPCAAKFIGGFVLGEAVGRYVAGPAINRAIGGMFGNPVDVTTGRKILLAESETDYVIPAPLPVAIKRFYSSGLDHVGTLGRGWVLPWDLRLQARDGRLWYTDAQGRESGFPLVRNGQSSFSESEQRYLTCTPDGRYVLHDIGETYYDFGRLDPDTDRIAWVRRIEDQAGQWTQFERDSQGRVREILTCGGIQAVLDYEAVHGR…
A0A106Q7E2_9BURK	Uncharacterized protein	WL29_28365	Burkholderia ubonensis	1413	MFEAARVTDPIEHTSALAGFLIGAVIGVALIAAVAFATFTCGFGVALLAGLVAGVGASAILSLGEAIGKMFSSPSGAIVTGSANVFINGKPAAYATLSGTACDKHNPVPLVAQGSTNVFINGRPAARKDDKITCGAAIGDGSHDTFIHGGTETYLPVDDEVPPWLRTTVDWAFALAGLVGGLAGLVKAAGGLSRAVLPCAAKFIGGFVLGEAVGRYVAGPAINRAIGGMFGNPVDVTTGRKILLAESETDYVIPAPLPVAIKRFYSSGLDHVGTLGRGWVLPWDLRLQARDGRLWYTDAQGRESGFPLVRNGQSSFSESEQRYLTCTPDGRYVLHDVGETYYDFGRLDPDTDRIAWVRRIEDQAGQWTQFERDSQGRVREILTCGGIQAVLDYEAVHGR…
A0A1B4PYH1_BURCE	Uncharacterized protein	WT26_22930	Burkholderia cepacia (Pseudomonas cepacia)	1413	MFEAARVTDPIEHTSALAGFLIGAVIGVALIAAVAFATFTCGFGVALLAGLVAGVGAGAILSLGEAIGKMFSSPSGAIVTGSANVFINGKPAAYATLSGTACDKHNPVPLVAQGSTNVFINGRPAARKDDKITCGAAIGDGSHDTFIHGGTETYLPVDDEVPPWLRTTVDWAFALAGLVGGLAGLVKAAGGLSRAVLPCAAKFIGGFVLGEAVGRYVAGPAINRAIGGMFGNPVDVTTGRKILLAESETDYVIPAPLPVAIRRFYSSGLDHVGTLGRGWVLPWDLRLQARDGRLWYTDAQGRESGFPLVRNGQSSFSESEQRYLTCTPDGRYVLHDVGETYYDFGRLDPDTDRIAWVRRIEDQAGQWTQFERDSQGRVREILTCGGIQAVLDYEAVHGR…
A0A3X2YF77_SALER	RHS repeat protein (Fragment)	EAA91_22175	Salmonella enterica (Salmonella choleraesuis)	903	MYEAARVDDPIYHTSALAGFLIGAIIGIAIIALAAFAFFSCGFLAGLILGFMADQIASGVLQLGEAIGRSIHHTAGKILTGSENVSTNSRPAARAVLSTVKCDNHIAEKRIAQGSENIYINSQPAARKDDHTECDAVIEDGSPNVFLGGGTQTVLEISSEIPDWLRKVVDVLFVVASLLGGLAGAWRQAAKLGTKFGTKCAAKFIGGELTGMAVSEAISGLFSNPVDVTTGQKILLPETDFTLPGRLPVTCSRFYASHLETVGLLGRGWRLNWETSLREDDEHITLTGVQGRELRYPKTMLTPGHQIFDPKEQLYLSRLHDGRYVLHYTDRSYYVFGDFDSDGMAYLLFMETPHRQRIVFGHEGGRLVRIASSSGHHLLLHRTQTPAGERLSRIELVQG…
A0A3T9MYH9_SALET	Type IV secretion protein Rhs (Fragment)	DNM22_25025	Salmonella enterica I	903	MYEAARVDDPIYHTSALAGFLIGAIIGIAIIALAAFAFFSCGFLAGLILGFMADQIASGVLQLGEAIGRSIHHTAGKILTGSENVSTNSRPAARAVLSTVKCDNHIAEKRIAQGSENIYINSQPAARKDDHTECDAVIEDGSPNVFLGGGTQTVLEISSEIPDWLRKVVDVLFVVASLLGGLAGAWRQAAKLGTKFGTKCAAKFIGGELTGMAVSEAISGLFSNPVDVTTGQKILLPETDFTLPGRLPVTCSRFYASHLETVGLLGRGWRLNWETSLREDDEHITLTGVQGRELRYPKTMLTPGHQIFDPKEQLYLSRLHDGRYVLHYTDRSYYVFGDFDSDGMAYLLFMETPHRQRIVFGHEGGRLVRIASSSGHHLLLHRTQTPAGERLSRIELVQG…
A0A3V2VHR0_SALET	RHS repeat protein (Fragment)	DRT10_22355 EEA63_21740 EIW86_21890 QF21_23430	Salmonella enterica I	903	MYEAARVDDPIYHTSALAGFLIGAIIGIAIIALAAFAFFSCGFLAGLILGFMADQIASGVLQLGEAIGRSIHHTAGKILTGSENVSTNSRPAARAVLSTVKCDNHIAEKRIAQGSENIYINSQPAARKDDHTECDAVIEDGSPNVFLGGGTQTVLKISSEIPDWLRKVVDVLFVVASLLGGLAGAWRQAAKLGTKFGTKCAAKFIGGELVGMAVGEAISGLFSNPVDVTTGQKILLPETDFTLPGRLPVTCSRFYASHLETVGLLGRGWRLNWETSLREDDEHITLTGVQGRELRYPKTMLTPGHQIFDPKEQLYLSRLHDGRYVLHYTDRSYYVFGDFDSDGMAYLLFMETPHRQRIVFGHEGGRLVRIASSSGHHLLLHRTQTPAGERLSRIELVQG…
A0A118NLD4_9BURK	Uncharacterized protein	WJ58_20760	Burkholderia ubonensis	1421	MFEAARVTDPIEHTSALAGFLIGAVIGVALIAAVAFATFTCGFGVALLAGLVAGVGASAILSLGEAIGKMFSSPSGAIVTGSANVFINGKPAAYATLSGTACDKHNPVPLVAQGSTNVFINGRPAARKDDKITCGAAIGDGSHDTFIHGGTETYLPVDDEVPPWLRTTVDWAFALAGLVGGLAGLVKAAGGLSRAVLPCAAKFIGGFVLGEAVGRYVAGPAINRAIGGMFGNPVDVTTGRKILLAESETDYVIPAPLPVAIKRFYSSGLDHVGTLGRGWVLPWDLRLQARDGRLWYTDAQGRESGFPLVRNGQSSFSESEQRYLTCTPDGRYVLHDVGETYYDFGRLDPDTDRIAWVRRIEDQAGQWTQFERDSQGRVREILTCGGIQAVLDYEAVHGR…
A0A3N7QK22_9BURK	Uncharacterized protein	DF011_02435	Burkholderia ubonensis	1421	MFEAARVTDPIEHTSALAGFLIGAVIGVALIAAVAFATFTCGFGVALLAGLVAGVGASAILSLGEAIGKMFSSPSGAIVTGSANVFINGKPAAYATLSGTACDKHNPVPLVAQGSTNVFINGRPAARKDDKITCGASIGDGSHDTFIHGGTETYLPVDDEVPPWLRTTVDWAFALAGLVGGLAGLVKAAGGLSRAVLPCAAKFIGGFVLGEAVGRYVAGPAINRAIGGMFGNPVDVTTGRKILLAESETDYVIPAPLPVAIKRFYSSGLDHAGTLGRGWVLPWDLRLQARDGRLWYTDAQGRESGFPLVRNGQSSFSESEQRYLTCTPDGRYVLHDVGETYYDFGRLDPDTDRIAWVRRIEDQAGQWMQFERDSQGRVREILTCGGIQAVLDYEAVHGR…
A0A105KFT3_9BURK	Uncharacterized protein	WK55_21425	Burkholderia ubonensis	1421	MFEAARVTDPIEHTSALAGFLIGAVIGVALIAAVAFATFTCGFGVALLAGLVAGVGAGAILSLGEAIGKMFSSPSGAIVTGSANVFINGKPAAYATLSGTACDKHNPVPLVAQGSTNVFINGRPAARKDDKITCGAAIGDGSHDTFIHGGTETYLPVDDEVPPWLRTTVDWAFALAGLVGGLAGLVKAAGGLSRAVLPCAAKFIGGFVLGEAVGRYVAGPAINRAIGGMFGNPVDVTTGRKILLAESETDYVIPAPLPVAIKRFYSSGLDHVGTLGRGWVLPWDLRLQARDGRLWYTDAQGRESGFPLVRNGQSSFSESEQRYLTCTPDGRYVLHDVGETYYDFGRLDPDTDRIAWVRRIEDQAGQWTQFERDSQGRVREILTCGGIQAVLDYEAVHGR…
A0A0D0H185_9BURK	KY49.ctg7180000000025_quiver, whole genome shotgun sequence	KY49_304	Burkholderia sp. MSHR3999	1422	MFEAARVTDPIEHTSALAGFLIGAVIGVALIAAVAFATFTCGFGVALLAGLVAGVGASAILSLGEAIGKMFSSPSGAIVTGSANVFINGKPAAYATLSGTACDKHNPVPLVAQGSTNVFINGRPAARKDDKITCGAAIGDGSHDTFIHGGTETYLPVDDEVPPWLRTTVDWALALAGLVGGLAGLVKAAGGLSRAVLPCAAKFIGGFVLGEAVGRYVAGPAINRAIGGMFGNPVDVTTGRKILLAESETDYVIPAPLPVAIKRFYSSGLDHVGTLGRGWVLPWDLRLQARDGRLWYTDAQGRESGFPLVRNGQSSFSESEQRYLTCTPDGCYVLHDVGETYYDFGRLDPDTDRIAWVRRIEDQAGQWTQFERDSQGRVREILTCGGIQAVLDYEAVHGR…
A0A107G1B0_9BURK	Uncharacterized protein	WL73_30850	Burkholderia ubonensis	1422	MFEAARVTDPIEHTSALAGFLIGAVIGVALIAAVAFATFTCGFGVALLAGLVAGVGASAILSLGEAIGKMFSSPSGAIVTGAANVFINGKPAAYATLSGTACDKHNPVPLVAQGSTNVFINGRPAARKDDKITCGASIGDGSHDTFIHGGTETYLPVDDEVPPWLRTTVDWAFALAGLVGGLAGLVKAAGGLSRAVLPCAAKFIGGFVLGEAVGRYVAGPAINRAIGGMFGNPVDVTTGRKILLAESETDYVIPAPLPVAIKRFYSSGLDHAGTLGRGWVLPWDLRLQARDGRLWYTDAQGRESGFPLVRNGQSSFSESEQRYLTCTPDGRYVLHDVGETYYDFGRLDPDTDRIAWVRRIEDQAGQWMQFERDSQGRVREILTCGGIQAVLDYEAVHGR…
A0A105YUD6_9BURK	Uncharacterized protein	WK95_21860	Burkholderia ubonensis	1422	MFEAARVTDPIEHTSALAGFLIGAVIGVALIAAVAFATFTCGFGVALLAGLVAGVGASAILSLGEAIGKMFSSPSGAIVTGSANVFINGKPAAYATLSGTACDKHNPVPLVAQGSTNVFINGRPAARKDDKITCGAAIGDGSHDTFIHGGTETYLPVDDEVPPWLRTTVDWAFALAGLVGGLAGLVKAAGGLSRAVLPCAAKFIGGFVLGEAVGRYVAGPAINRAIGGMFGNPVDVTTGRKILLAESETDYVIPAPLPVAIKRFYSSGLDHVGTLGRGWVLPWDLRLQARDGRLWYTDAQGRESGFPLVRNGQSSFSESEQRYLTCTPDGRYVLHDVGETYYDFGRLDPDTDRIAWVRRIEDQAGQWTQFERDSQGRVREILTCGGIQAVLDYEAVHGR…
A0A3T5JUC0_SALET	Type IV secretion protein Rhs (Fragment)	D6R98_23295 DLF36_24235	Salmonella enterica I	917	MYEAARVDDPIYHTSALAGFLIGAIIGIAIIALAAFAFFSCGFLAGLILGFMADQIASGVLQLGEAIGRSIHHTAGKILTGSENVSTNSRPAARAVLSTVKCDNHIAEKRIAQGSENIYINSQPAARKDDHTECDAVIEDGSPNVFLGGGTQTVLEISSEIPDWLRKVVDVLFVVASLLGGLAGAWRQAAKLGTKFGTKCAAKFIGGELVGMAVGEAISGLFSNPVDVTTGQKILLPETDFTLPGRLPVTCSRFYASHLETVGLLGRGWRLNWETSLRDDDEHITLTGVQGRELRYPKTMLTPGHQIFDPEEQLYLSRLHDGRYVLHYTDRSYYVFGDFDSDGMAYLLFMETPHRQRIVFGHEGGRLVRIASSSGHHLLLHRTQTPAGERLSRIELVQG…
A0A3Y8WUX1_SALET	RHS repeat protein (Fragment)	CC968_23220	Salmonella enterica I	917	MYEAARVDDPIYHTSALAGFLIGAIIGIAIIALAAFAFFSCGFLAGLILGFMADQIASGVLQLGEAIGRSIHHTAGKILTGSENVSTNSRPAARAVLSTVKCDNHIAEKRIAQGSENIYINSQPAARKDDHTECDAVIEDGSPNVFLGGGTQTVLEISSEIPDWLRKVVDVLFVVASLLGGLAGAWRQAAKLGTKFGTKCAAKFIGGELVGMAVGEAISGLFSNPVDVTTGQKILLPETDFTLPGRLPVTCSRFYASHLETVGLLGRGWRLNWETSLREDDEHITLTGVQGRELRYPKTMLTPGHQIFDPKEQLYLSRLHDGRYVLHYTDRSYYVFGDFDSDGMAYLLFMETPHRQRIVFGHEGGRLVRIASSSGHHLLLHRTQTPAGERLSRIELVQG…
A0A3Z6N0K1_SALET	Type IV secretion protein Rhs (Fragment)	D5C21_23085 DP703_23685 EBK48_23015 EDK87_22795 EIE60_22470	Salmonella enterica I	917	MYEAARVDDPIYHTSALAGFLIGAIIGIAIIALAAFAFFSCGFLAGLILGFMADQIASGVLQLGEAIGRSIHHTAGKILTGSENVSTNSRPAARAVLSTVKCDNHIAEKRIAQGSENIYINSQPAARKDDHTECDAVIEDGSPNVFLGGGTQTVLEISSEIPDWLRKVVDVLFVVASLLGGLAGAWRQAAKLGTKFGTKCAAKFIGGELVGMAVGEAISGLFSNPVDVTTGQKILLPETDFTLPGRLPVTCSRFYASHLETVGLLGRGWRLNWETSLRDDDEHITLTGVQGRELRYPKTMLTPGHQIFDPEEQLYLSRLHDGRYVLHYTDRSYYVFGDFDSDGMAYLLFMETPHRQRIVFGHEGGRLVRIASSSGHHLLLHRTQTPAGERLSRIELVQG…
A0A3Z2JMB0_SALET	Type IV secretion protein Rhs (Fragment)	D5O48_23535	Salmonella enterica I	917	MYEAARVDDPIYHTSALAGFLIGAIIGIAIIALAAFAFFSCGFLAGLILGFMADQIASGVLQLGEAIGRSIHHTAGKILTGSENVSTNSRPAARAVLSTVKCDNHIAEKRIAQGSENIYINSQPAARKDDHTECDAVIEDGSPNVFLGGGTQTVLEISSEIPDWLRKVVDVLFVVASLLGGLAGAWRQAAKLGTKFGTKCAAKFIGGELVGMAVGEAISGLFSNPVDVTTGQKILLPETDFTLPGRLPVTCSRFYASHLETVGLLGRGWRLNWETSLRDDDEHITLTGVQGRELRYPKTMLTPGHQIFDPEEQLYLSRLHDGRYVLHYTDRSYYVFGDFDSDGMAYLLFMETPHRQRIVFGHEGGRLVRIASSSGHHLLLHRTQTPAGERLSRIELVQG…
A0A3Z6ZUF9_SALET	Type IV secretion protein Rhs (Fragment)	D9O71_22685	Salmonella enterica I	930	MYEAARVDDPIYHTSALAGFLIGAIIGIAIIALAAFAFFSCGFLAGLILGFMADQIASGVLQLGEAIGRSIHHTAGKILTGSENVSTNSRPAARAVLSTVKCDNHIAEKRIAQGSENIYINSQPAARKDDHTECDAVIEDGSPNVFLGGGTQTVLEISSEIPDWLRKVVDVLFVVASLLGGLAGAWRQAAKLGTKFGTKCAAKFIGGELVGMAVGEAISGLFSNPVDVTTGQKILLPETDFTLPGRLPVTCSRFYASHLETVGLLGRGWRLNWETSLRDDDEHITLTGVQGRELRYPKTMLTPGHQIFDPEEQLYLSRLHDGRYVLHYTDRSYYVFGDFDSDGMAYLLFMETPHRQRIVFGHEGGRLVRIASSSGHHLLLHRTQTPAGERLSRIELVQG…
A0A3Y3L511_SALET	Type IV secretion protein Rhs (Fragment)	EBK43_22600	Salmonella enterica I	934	MYEAARVDDPIYHTSALAGFLIGAIIGIAIIALAAFAFFSCGFLAGLILGFMADQIASGVLQLGEAIGRSIHHTAGKILTGSENVSTNSRPAARAVLSTVKCDNHIAEKRIAQGSENIYINSQPAARKDDHTECDAVIEDGSPNVFLGGGTQTVLEISSEIPDWLRKVVDVLFVVASLLGGLAGAWRQAAKLGTKFGTKCAAKFIGGELVGMAVGEAISGLFSNPVDVTTGQKILLPETDFTLPGRLPVTCSRFYASHLETVGLLGRGWRLNWETSLRDDDEHITLTGVQGRELRYPKTMLTPGHQIFDPEEQLYLSRLHDGRYVLHYTDRSYYVFGDFDSDGMAYLLFMETPHRQRIVFGHEGGRLVRIASSSGHHLLLHRTQTPAGERLSRIELVQG…
A0A3U9AXJ9_SALET	RHS repeat protein (Fragment)	DQS71_22155	Salmonella enterica I	934	MYEAARVDDPIYHTSALAGFLIGAIIGIAIIALAAFAFFSCGFLAGLILGFMADQIASGVLQLGEAIGRSIHHTAGKILTGSENVSTNSRPAARAVLSTVKCDNHIAEKRIAQGSENIYINSQPAARKDDHTECDAVIEDGSPNVFLGGGTQTVLKISSEIPDWLRKVVDVLFVVASLLGGLAGAWRQAAKLGTKFGTKCAAKFIGGELVGMAVGEAISGLFSNPVDVTTGQKILLPETDFTLPGRLPVTCSRFYASHLETVGLLGRGWRLNWETSLREDDEHITLTGVQGRELRYPKTMLTPGHQIFDPKEQLYLSRLHDGRYVLHYTDRSYYVFGDFDSDGMAYLLFMETPHRQRIVFGHEGGRLVRIASSSGHHLLLHRTQTPAGERLSRIELVQG…
A0A3V3SC20_SALET	RHS repeat protein (Fragment)	AAV76_24155	Salmonella enterica I	935	MYEAARVDDPIYHTSALAGFLIGAIIGIAIIALAAFAFFSCGFLAGLILGFMADQIASGVLQLGEAIGRSNHHTAGKILTGSENVSTNSRPAARAVLSTVKCDNHIAEKRIAQGSENIYINSQPAARKDDHTECDAVIEDGSPNVFLGGGTQTVLEISSEIPDWLRKVVDVLFVVASLLGGLAGAWRQAAKLGTKFGTKCAAKFIGGELVGMAVGEAISGLFSNPVDVTTGQKILLPETDFTLPGRLPVTCSRFYASHLETVGLLGRGWRLNWETSLREDDEHITLTGVQGRELRYPKTMLTPGHQIFDPEEQLYLSRLHDGRYVLHYTDRSYYVFGDFDSDGMAYLLFMETPHRQRIVFGHEGGRLVRIASSSGHHLLLHRTQTPAGERLSRIELVQG…
A0A3Z9DC36_SALER	RHS repeat protein (Fragment)	D7G59_25360	Salmonella enterica (Salmonella choleraesuis)	935	MYEAARVDDPIYHTSALAGFLIGAIIGIAIIALAAFAFFSCGFLAGLILGFMADQIASGVLQLGEAIGRSIHHTAGKILTGSENVSTNSRPAARAVLSTVKCDNHIAEKRIAQGSENIYINSQPAARKDDHTECDAVIEDGSPNVFLGGGTQTVLEISSEIPDWLRKVVDVLFVVASLLGGLAGAWRQSAKLGTKFGTKCAAKFIGGELVGMAVGEAISGLFSNPVDVTTGQKILLPETDFTLPGRLPVTCSRFYASHLETVGLLGRGWRLNWETSLREDDEHITLTGVQGRELRYPKTMLTPGHQIFDPEEQLYLSRLHDGRYVLHYTDRSYYVFGDFDSDGMAYLLFMETPHRQRIVFGHEGGRLVRIASSSGHHLLLHRTQTPAGERLSRIELVQG…
A0A3Y5ZND1_SALSE	RHS repeat protein (Fragment)	PV47_25295	Salmonella senftenberg	935	MYEAARVDDPIYHTSALAGFLIGAIIGIAIIALAAFAFFSCGFLAGLILGFMADQIASGVLQLGEAIGRSIHHTAGKILTGSENVSTNSRPAARAVLSTVKCDNHIAEKRIAQGSENIYINSQPAARKDDHTECDAVIEDGSPNVFLGGGTQTVLEISSEIPDWLRKVVDVLFVVASLLGGLAGAWRQAAKLGTKFGTKCAAKFIGGELVGMAVGEAISGLFSNPVDVTTGQKILLPETDFTLPGRLPVTCSRFYASHLETVGLLGRGWRLNWETSLREDDEHITLTGVQGRELRYPKTMLTPGHQIFDPEEQLYLSRLHDGRYVLHYTDRSYYVFGDFDSDGMAYLLFMETPHRQRIVFGHEGGRLVRIASSSGHHLLLHRTQTPAGERLSRIELVQG…
A0A3V8TJQ6_SALER	RHS repeat protein (Fragment)	BAZ29_24080	Salmonella enterica (Salmonella choleraesuis)	935	MYEAARVDDPIYHTSALAGFLIGAIIGIAIIALAAFAFFSCGFLAGLILGFMADQIASGVLQLGEAIGRSNHHTAGKILTGSENVSTNSRPAARAVLSTVKCDNHIAEKRIAQGSENIYINSQPAARKDDHTECDAVIEDGSPNVFLGGGTQTVLEISSEIPDWLRKVVDVLFVVASLLGGLAGAWRQAAKLGTKFGTKCAAKFIGGELVGMAVGEAISGLFSNPVDVTTGQKILLPETDFTLPGRLPVTCSRFYASHLETVGLLGRGWRLNWETSLREDDEHITLTGVQGRELRYPKTMLTPGHQIFDPEEQLYLSRLHDGRYVLHYTDRSYYVFGDFDSDGMAYLLFMETPHRQRIVFGHEGGRLVRIASSSGHHLLLHRTQTPAGERLSRIELVQG…
A0A3V1YG73_SALET	Type IV secretion protein Rhs (Fragment)	DSM81_22830	Salmonella enterica I	939	MYEAARVDDPIYHTSALAGFLIGAIIGIAIIALAAFAFFSCGFLAGLILGFMADQIASGVLQLGEAIGRSIHHTAGKILTGSENVSTNSRPAARAVLSTVKCDNHIAEKRIAQGSENIYINSQPAARKDDHTECDAVIEDGSPNVFLGGGTQTVLEISSEIPDWLRKVVDVLFVVASLLGGLAGAWRQAAKLGTKFGTKCAAKFIGGELVGMAVGEAISGLFSNPVDVTTGQKILLPETDFTLPGRLPVTCSRFYASHLETVGLLGRGWRLNWETSLRDDDEHITLTGVQGRELRYPKTMLTPGHQIFDPEEQLYLSRLHDGRYVLHYTDRSYYVFGDFDSDGMAYLLFMETPHRQRIVFGHEGGRLVRIASSSGHHLLLHRTQTPAGERLSRIELVQG…
A0A3Y9TU82_SALET	Type IV secretion protein Rhs (Fragment)	D5P54_23155	Salmonella enterica I	941	MYEAARVDDPIYHTSALAGFLIGAIIGIAIIALAAFAFFSCGFLAGLILGFMADQIASGVLQLGEAIGRSIHHTAGKILTGSENVSTNSRPAARAVLSTVKCDNHIAEKRIAQGSENIYINSQPAARKDDHTECDAVIEDGSPNVFLGGGTQTVLEISSEIPDWLRKVVDVLFVVASLLGGLAGAWRQAAKLGTKFGTKCAAKFIGGELVGMAVGEAISGLFSNPVDVTTGQKILLPETDFTLPGRLPVTCSRFYASHLETVGLLGRGWRLNWETSLRDDDEHITLTGVQGRELRYPKTMLTPGHQIFDPEEQLYLSRLHDGRYVLHYTDRSYYVFGDFDSDGMAYLLFMETPHRQRIVFGHEGGRLVRIASSSGHHLLLHRTQTPAGERLSRIELVQG…
A0A3Z1LII3_SALET	Type IV secretion protein Rhs (Fragment)	EC492_14055	Salmonella enterica I	942	MYEAARVDDPIYHTSALAGFLIGAIIGIAIIALAAFAFFSCGFLAGLILGFMADQIASGVLQLGEAIGRSIHHTAGKILTGSENVSTNSRPAARAVLSTVKCDNHIAEKRIAQGSENIYINSQPAARKDDHTECDAVIEDGSPNVFLGGGTQTVLEISSEIPDWLRKVVDVLFVVASLLGGLAGAWRQAAKLGTKFGTKCAAKFIGGELVGMAVGEAISGLFSNPVDVTTGQKILLPETDFTLPGRLPVTCSRFYASHLETVGLLGRGWRLNWETSLRDDDEHITLTGVQGRELRYPKTMLTPGHQIFDPEEQLYLSRLHDGRYVLHYTDRSYYVFGDFDSDGMAYLLFMETPHRQRIVFGHEGGRLVRIASSSGHHLLLHRTQTPAGERLSRIELVQG…
A0A3U0VRY5_SALET	Type IV secretion protein Rhs (Fragment)	DNZ02_23765	Salmonella enterica I	949	MYEAARVDDPIYHTSALAGFLIGAIIGIAIIALAAFAFFSCGFLAGLILGFMADQIASGVLQLGEAIGRSIHHTAGKILTGSENVSTNSRPAARAVLSTVKCDNHIAEKRIAQGSENIYINSQPAARKDDHTECDAVIEDGSPNVFLGGGTQTVLEISSEIPDWLRKVVDVLFVVASLLGGLAGAWRQAAKLGTKFGTKCAAKFIGGELVGMAVGEAISGLFSNPVDVTTGQKILLPETDFTLPGRLPVTCSRFYASHLETVGLLGRGWRLNWETSLRDDDEHITLTGVQGRELRYPKTMLTPGHQIFDPEEQLYLSRLHDGRYVLHYTDRSYYVFGDFDSDGMAYLLFMETPHRQRIVFGHEGGRLVRIASSSGHHLLLHRTQTPAGERLSRIELVQG…
A0A3V1I5K4_SALET	Type IV secretion protein Rhs (Fragment)	DRY30_23465	Salmonella enterica I	956	MYEAARVDDPIYHTSALAGFLIGAIIGIAIIALAAFAFFSCGFLAGLILGFMADQIASGVLQLGEAIGRSIHHTAGKILTGSENVSTNSRPAARAVLSTVKCDNHIAEKRIAQGSENIYINSQPAARKDDHTECDAVIEDGSPNVFLGGGTQTVLEISSEIPDWLRKVVDVLFVVASLLGGLAGAWRQAAKLGTKFGTKCAAKFIGGELVGMAVGEAISGLFSNPVDVTTGQKILLPETDFTLPGRLPVTCSRFYASHLETVGLLGRGWRLNWETSLRDDDEHITLTGVQGRELRYPKTMLTPGHQIFDPEEQLYLSRLHDGRYVLHYTDRSYYVFGDFDSDGMAYLLFMETPHRQRIVFGHEGGRLVRIASSSGHHLLLHRTQTPAGERLSRIELVQG…
A0A3V9FSV4_SALSE	RHS repeat protein (Fragment)	AC863_25505	Salmonella senftenberg	962	MYEAARVDDPIYHTSALAGFLIGAIIGIAIIALAAFAFFSCGFLAGLILGFMADQIASGVLQLGEAIGRSIHHTAGKILTGSENVSTNSRPAARAVLSTVKCDNHIAEKRIAQGSENIYINSQPAARKDDHTECDAVIEDGSPNVFLGGGTQTVLEISSEIPDWLRKVVDVLFVVASLLGGLAGAWRQAAKLGTKFGTKCAAKFIGGELVGMAVGEAISGLFSNPVDVTTGQKILLPETDFTLPGRLPVTCSRFYASHLETVGLLGRGWRLNWETSLREDDEHITLTGVQGRELRYPKTMLTPGHQIFDPEEQLYLSRLHDGRYVLHYTDRSYYVFGDFDSDGMAYLLFMETPHRQRIVFGHEGGRLVRIASSSGHHLLLHRTQTPAGERLSRIELVQG…
A0A3X6VD99_SALER	RHS repeat protein	EIT81_20885	Salmonella enterica (Salmonella choleraesuis)	962	MYEAARVDDPIYHTSALAGFLIGAIIGIAIIALAAFAFFSCGFLAGLILGFMADQIASGVLQLGEAIGRSIHHTAGKILTGSENVSTNSRPAARAVLSTVKCDNHIAEKRIAQGSENIYINSQPAARKDDHTECDAVIEDGSPNVFLGGGTQTVLEISSEIPDWLRKVVDVLFVVASLLGGLAGAWRQAAKLGTKFGTKCAAKFIGGELVGMAVGEAISGLFSNPVDVTTGQKILLPETDFTLPGRLPVTCSRFYASHLETVGLLGRGWRLNWETSLREDDEYITLTGVQGRELRYPKTMLTPGHQIFDPEEQLYLSRLHDGRYVLHYTDRSYYVFGDFDSDGMAYLLFMETPHRQRIVFGHEGGRLVRIASSSGHHLLLHRTQTPAGERLSRIELVQG…
A0A3Z3T3B2_SALET	RHS repeat protein	DS689_14980 GX90_22985	Salmonella enterica I	962	MYEAARVDDPIYHTSALAGFLIGAIIGIAIIALAAFAFFSCGFLAGLILGFMADQIASGVLQLGEAIGRSIHHTAGKILTGSENVSTNSRPAARAVLSTVKCDNHIAEKRIAQGSENIYINSQPAARKDDHTECDAVIEDGSPNVFLGGGTQTVLEISSEIPDWLRKVVDVLFVVASLLGGLAGAWRQAAKLGTKFGTKCAAKFIGGELVGMAVGEAISGLFSNPVDVTTGQKILLPETDFTLPGRLPVTCSRFYASHLETVGLLGRGWRLNWETSLREDDEYITLTGVQGRELRYPKTMLTPGHQIFDPEEQLYLSRLHDGRYVLHYTDRSYYVFGDFDSDGMAYLLFMETPHRQRIVFGHEGGRLVRIASSSGHHLLLHRTQTPAGERLSRIELVQG…
A0A3Z3V3V5_SALET	Type IV secretion protein Rhs (Fragment)	D4X67_23415 D7O25_23235	Salmonella enterica I	968	MYEAARVDDPIYHTSALAGFLIGAIIGIAIIALAAFAFFSCGFLAGLILGFMADQIASGVLQLGEAIGRSIHHTAGKILTGSENVSTNSRPAARAVLSTVKCDNHIAEKRIAQGSENIYINSQPAARKDDHTECDAVIEDGSPNVFLGGGTQTVLEISSEIPDWLRKVVDVLFVVASLLGGLAGAWRQAAKLGTKFGTKCAAKFIGGELVGMAVGEAISGLFSNPVDVTTGQKILLPETDFTLPGRLPVTCSRFYASHLETVGLLGRGWRLNWETSLRDDDEHITLTGVQGRELRYPKTMLTPGHQIFDPEEQLYLSRLHDGRYVLHYTDRSYYVFGDFDSDGMAYLLFMETPHRQRIVFGHEGGRLVRIASSSGHHLLLHRTQTPAGERLSRIELVQG…
A0A3U7I7E9_SALET	Type IV secretion protein Rhs (Fragment)	DP713_23875 EBJ71_22205	Salmonella enterica I	969	MYEAARVDDPIYHTSALAGFLIGAIIGIAIIALAAFAFFSCGFLAGLILGFMADQIASGVLQLGEAIGRSIHHTAGKILTGSENVSTNSRPAARAVLSTVKCDNHIAEKRIAQGSENIYINSQPAARKDDHTECDAVIEDGSPNVFLGGGTQTVLEISSEIPDWLRKVVDVLFVVASLLGGLAGAWRQAAKLGTKFGTKCAAKFIGGELVGMAVGEAISGLFSNPVDVTTGQKILLPETDFTLPGRLPVTCSRFYASHLETVGLLGRGWRLNWETSLRDDDEHITLTGVQGRELRYPKTMLTPGHQIFDPEEQLYLSRLHDGRYVLHYTDRSYYVFGDFDSDGMAYLLFMETPHRQRIVFGHEGGRLVRIASSSGHHLLLHRTQTPAGERLSRIELVQG…
A0A3V5SMZ7_SALER	RHS repeat protein (Fragment)	EAP22_23110	Salmonella enterica (Salmonella choleraesuis)	979	MYEAARVDDPIYHTSALAGFLIGAIIGIAIIALAAFAFFSCGFLAGLILGFMADQIASGVLQLGEAIGRSIHHTAGKILTGSENVSTNSRPAARAVLSTVKCDNHIAEKRIAQGSENIYINSQPAARKDDHTECDAVIEDGSPNVFLGGGTQTVLEISSEIPDWLRKVVDVLFVVASLLGGLAGAWRQAAKLGTKFGTKCAAKFIGGELAGMAVGEAISGLFSNPVDVTTGQKILLPETDFTLPGRLPVTCSRFYASHLETVGLLGRGWRLNWETSLREDDEHITLTGVQGRELCYPKTMLTPGHQIFDPKEQLYLSRLHDGRYVLHYTDRSYYVFGDFDSDGMAYLLFMETPHRQRIVFGHEGGRLVRIASSSGHHLLLHRTQTPAGERLSRIELVQG…
A0A0K3Y8L3_ECOLX	Rhs core protein with extension	wapA_2 ERS085366_04151	Escherichia coli	1350	MYEAARVDDPIYHTSALAGFLIGAIIGIAIIAVAAFAFFTCGFFAGLVLGFLADQIASGVLQLGEAIGRSIHSTAGKILTGSPNVSTNSRPAARAVLSTVICEDHSPEIRIAQGSGNIYINSQPAARKDDHTECDAVIEDGSPNVFLGGGTQTVLEISPEIPDCLRQVVDVLFVVAGMVGGLAGAARQAAKLGTKFGTKCAAKFIGGEITGMAVFEVAMGLFSNPVDVTTGQKILLPETDFTLPGRLPVTCSRFYASHLETEGLLGRGWRLNWEINLREDETYITFIGVQGRELSYPKAMLTPGHQIFDPEEQFYLSRLHDGRYVLHYTDRSYYVFDEFDDHGVAPLLFMETPYRQRIAFGRENGRLVRVASSSGHHLLLHRTMTPAGERLSHIELVKG…
A0A3X9Z105_SALET	Type IV secretion protein Rhs (Fragment)	EDL46_23765	Salmonella enterica I	981	MYEAARVDDPIYHTSALAGFLIGAIIGIAIIALAAFAFFSCGFLAGLILGFMADQIASGVLQLGEAIGRSIHHTAGKILTGSENVSTNSRPAARAVLSTVKCDNHIAEKRIAQGSENIYINSQPAARKDDHTECDAVIEDGSPNVFLGGGTQTVLEISSEIPDWLRKVVDVLFVVASLLGGLAGAWRQAAKLGTKFGTKCAAKFIGGELVGMAVGEAISGLFSNPVDVTTGQKILLPETDFTLPGRLPVTCSRFYASHLETVGLLGRGWRLNWETSLRDDDEHITLTGVQGRELRYPKTMLTPGHQIFDPEEQLYLSRLHDGRYVLHYTDRSYYVFGDFDSDGMAYLLFMETPHRQRIVFGHEGGRLVRIASSSGHHLLLHRTQTPAGERLSRIELVQG…
L3PF43_ECOLX	YD repeat (Two copies)	A1U5_00585	Escherichia coli KTE66	1367	MYEAARVDDPIYHTSALAGFLIGAIIGIAIIAVAAFAFFTCGFFAGLVLGFLADQIASGVLQLGEAIGRSIHSTAGKILTGSPNVNTNSRPAARAVLSTVICEDHSPEIRIAQGSCNIYINSQPAARKDDHTECDAVIEDGSPNVFLGGGTQTVLEISPEIPDWLRQVVDVLFVVAGMVGGLAGAARQAAKLGTKFGTKCAAKFIGGEITGMAVSEVAMGLFSNPVDVTTGQKILLPETDFTLPGRLPVTCSRFYASHLETEGLLGRGWRLNWEINLREDETYITFIGVQGRELSYPKAMLTPGHQIFDPEEQFYLSRLHDGRYVLHYTDRSYYVFDEFDDHGVAPLLFMETPYRQRIAFGRENGRLVRVASSSGHHLLLHRTMTPAGERLSHIELVKG…
A0A2X6IQR1_ECOLX	Rhs core protein with extension	wapA_2 wapA_1 SAMEA3472110_01819 SAMEA3472112_03228 SAMEA3752372_03246	Escherichia coli	1367	MYEAARVDDPIYHTSALAGFLIGAIIGIAIIAVAAFAFFTCGFFAGLVLGFLADQIASGVLQLGEAIGRSIHSTAGKILTGSPNVSTNSRPAARAVLSTVICEDHSPEIRIAQGAGNIYINSQPAARKDDHTECDAVIEDGSPNVFLGGGTQTVLEISPEIPDWLRQVVDVLFVVAGMVGGLAGAARQAAKLGTKFGTKCAAKFIGGEITGMAVSEVAMGLFSNPVDVTTGQKILLPETDFTLPGRLPVTCSRFYASHLETEGLLGRGWRLNWEINLREDETYITFIGVQGRELSYPKAMLTPGHQIFDPEEQFYLSRLHDGRYVLHYTDRSYYVFDEFDDHGVAPLLFMETPYRQRIAFGRENGRLVRVASSSGHHLLLHRTMTPAGERLSHIELVKG…
A0A3N8BKZ5_9BURK	Tox-URI2 domain-containing protein	DIE18_29430	Burkholderia sp. Bp9125	1397	MFEAARVTDPIEHTSALTGFLIGAVIGIALIAAVAFATFTCGFGVALLAGLAAGVGASGILSLGEAIGKMFTSTSGAIVSGSPNVFINGRPAAYATLSGVMCDKHNPVPLVAQGSTNVFINGRPAARKDDKITCGAAIGDGSHDTFVHGGTQTYLPVDDEVPPWLRTAVDWAFALAGLVGGLAGLVKAAGGLSRAVLPCAAKFIGGFVLGEVVSRYVAGPAINRAIGGLFGNPVDVTTGRKVLLAEAEIDYVIPSPLPVQIKRFYSSNLDQAGTLGRGWVLPWELRLQARDGRLWYTDAQGRESGFPLVRSGQSSFSDSEQRYLTCTPDGRYVLHDVGETYCDFGRLDPDTDRIAWVRRIEDQAGQWMQFERDSQGRVREILTCGGIQAVLDYEPVHGR…
L4JF24_ECOLX	YD repeat (Two copies)	A311_00757	Escherichia coli KTE146	1377	MYEAARVDDPIYHTSALAGFLIGAIIGIAIIAVAAFAFFTCGFFAGLVLGFLADQIASGVLQLGEAIGRSIHSTAGKILTGSPNVSTNSRPAARAVLSTVICEDHSPEIRIAQGSGNIYINSQPAARKDDHTECDAVIEDGSPNVFLGGGTQTVLEISPEIPDWLRQVVDVLFVVAGMVGGLAGAARQAAKLGTKFGTKCAAKFIGGEITGMAVSEVAMGLFSNPVDVTTGQKILLPETDFTLPGRLPVTCSRFYASHLETEGLLGRGWRLNWEINLREDETYITFIGVQGRELSYLKAMLTPGHQIFDPEEQFYLSRLHDGRYVLHYTDRSYYVFDEFDDHGVAPLLFMETPYRQRIAFGRENGRLVRVASSSGHHLLLHRTMTPAGERLSHIELVKG…
F4UYG6_ECOLX	Rhs-related protein	ECNG_01752	Escherichia coli TA280	1377	MYEAARVDDPIYHTSALAGFLIGAIIGIAIIAVAAFAFFTCGFFAGLVLGFLADQIASGVLQLGEAIGRSIHSTAGKILTGSPNVNTNSRPAARAVLSTVICEDHSPEIRIAQGSCNIYINSQPAARKDDHTECDAVIEDGSPNVFLGGGTQTVLEISPEIPDWLRQVVDVLFVVAGMVGGLAGAARQAAKLGTKFGTKCAAKFIGGEITGMAVSEVAMGLFSNPVDVTTGQKILLPETDFTLPGRLPVTCSRFYASHLETEGLLGRGWRLNWEINLREDETYITFIGVQGRELSYPKAMLTPGHQIFDPEEQFYLSRLHDGRYVLHYTDRSYYVFDEFDDHGVAPLLFMETPYRQRIAFGRENGRLVRVASSSGHHLLLHRTMTPAGERLSHIELVKG…
A0A329XRH4_ECOLX	RHS repeat protein	DQE83_19270	Escherichia coli	1377	MYEAARVDDPIYHTSALAGFLIGAIIGIAIIAVAAFAFFTCGFFAGLVLGFLADQIASGVLQLGEAIGRSIHSTAGKILTGSPNVSTNSRPAARAVLSTVICEDHSPEIRIAQGSGNIYINSQPAARKDDHTECDAVIEDGSPNVFLGGGTQTVLEISPEIPDWLRQVVDVLFVVAGMVGGLAGAARQAAKLGTKFGTKCAAKFIGGEITGMAVSEVAMGLFSNPVDVTTGQKILLPETDFTLPGRLPVTCSRFYASHLETEGLLGRGWRLNWEINLREDETYITFIGVQGRELSYLKAMLTPGHQIFDPEEQFYLSRLHDGRYVLHYTDRSYYVFDEFDDHGVAPLLFMETPYRQRIAFGRENGRLVRVASSSGHHLLLHRTMTPAGERLSHIELVKG…
A0A1V2GES6_ECOLX	Type IV secretion protein Rhs	BXT93_12655	Escherichia coli	1377	MYEAARVDDPIYHTSALAGFLIGAIIGIAIIAVAAFAFFTCGFFAGLVLGFLADQIASGVLQLGEAIGRSIHSTAGKILTGSPNVNTNSRPAARAVLSTVICEDHSPEIRIAQGSCNIYINSQPAARKDDHTECDAVIEDGSPNVFLGGGTQTVLEISPEIPDWLRQVVDVLFVVAGMVGGLAGAARQAAKLGTKFGTKCAAKFIGGEITGMAVSEVAMGLFSNPVDVTTGQKILLPETDFTLPGRLPVTCSRFYASHLETEGLLGRGWRLNWEINLREDETYITFIGVQGRELSYPKAMLTPGHQIFDPEEQFYLSRLHDGRYVLHYTDRSYYVFDEFDDHGVAPLLFMETPYRQRIAFGRENGRLVRVASSSGHHLLLHRTMTPAGERLSHIELVKG…
A0A3U3H5A6_SALET	RHS repeat protein (Type IV secretion protein Rhs) (Fragment)	D4385_23525 DKT39_23565 DLM00_23165 DMA99_21850 DML93_24015 DNW08_22315 DO777_23200 DOB44_24390 DOK00_20085 DPF29_23775 DPP19_23690 DQ056_23945 DRU29_24125 DRU82_23530 DS452_23180 DS625_23805 DTV49_23290 DUA71_23595 DUB32_23670 ECC68_23275	Salmonella enterica I	1000	MYEAARVDDPIYHTSALAGFLIGAIIGIAIIALAAFAFFSCGFLAGLILGFMADQIASGVLQLGEAIGRSIHHTAGKILTGSENVSTNSRPAARAVLSTVKCDNHIAEKRIAQGSENIYINSQPAARKDDHTECDAVIEDGSPNVFLGGGTQTVLEISSEIPDWLRKVVDVLFVVASLLGGLAGAWRQAAKLGTKFGTKCAAKFIGGELTGMAVSEAISGLFSNPVDVTTGQKILLPETDFTLPGRLPVTCSRFYASHLETVGLLGRGWRLNWETSLRDDDEHITLTGVQGRELRYPKTMLTPGHQIFDPEEQLYLSRLHDGRYVLHYTDRSYYVFGDFDSDGMAYLLFMETPHRQRIVFGHEGGRLVRIASSSGHHLLLHRTQTPAGERLSRIELVQG…
A0A402MYF3_SALET	RHS repeat protein (Fragment)	AIK92_21465	Salmonella enterica subsp. enterica serovar Braenderup str. CFSAN001740	1000	MYEAARVDDPIYHTSALAGFLIGAIIGIAIIALAAFAFFSCGFLAGLILGFMADQIASGVLQLGEAIGRSIHHTAGKILTGSENVSTNSRPAARAVLSTVKCDNHIAEKRIAQGSENIYINSQPAARKDDHTECDAVIEDGSPNVFLGGGTQTVLEISSEIPDWLRKVVDVLFVVASLLGGLAGAWRQAAKLGTKFGTKCAAKFIGGELTGMAVSEAISGLFSNPVDVTTGQKILLPETDFTLPGRLPVTCSRFYASHLETVGLLGRGWRLNWETSLRDDDEHITLTGVQGRELRYPKTMLTPGHQIFDPEEQLYLSRLHDGRYVLHYTDRSYYVFGDFDSDGMAYLLFMETPHRQRIVFGHEGGRLVRIASSSGHHLLLHRTQTPAGERLSRIELVQG…
A0A3V2G3H9_SALET	RHS repeat protein (Fragment)	A4N09_22515 A4W36_22535 A4W39_23590 A4W49_21645 A4W50_22600 A4W55_22515 A4W58_22685 A9J48_22565 A9J49_19905 A9J55_22615 A9J63_22730 A9J68_23255 A9J70_22605 A9J86_22565 A9J88_22870 AIM14_23815 AU844_22920 AVC61_22965 AVG14_20775 D6Q91_26030 DQS07_23820 E0574_23270 E0647_23365 E0774_22985 E0S97_21875 E0U31_23400 E0X07_21955 E0Y29_23160 E1331_22645 E1357_22620 E1540_22885 E1576_22850 E1653_23405 E16…	Salmonella enterica subsp. enterica serovar Braenderup	1000	MYEAARVDDPIYHTSALAGFLIGAIIGIAIIALAAFAFFSCGFLAGLILGFMADQIASGVLQLGEAIGRSIHHTAGKILTGSENVSTNSRPAARAVLSTVKCDNHIAEKRIAQGSENIYINSQPAARKDDHTECDAVIEDGSPNVFLGGGTQTVLEISSEIPDWLRKVVDVLFVVASLLGGLAGAWRQAAKLGTKFGTKCAAKFIGGELTGMAVSEAISGLFSNPVDVTTGQKILLPETDFTLPGRLPVTCSRFYASHLETVGLLGRGWRLNWETSLRDDDEHITLTGVQGRELRYPKTMLTPGHQIFDPEEQLYLSRLHDGRYVLHYTDRSYYVFGDFDSDGMAYLLFMETPHRQRIVFGHEGGRLVRIASSSGHHLLLHRTQTPAGERLSRIELVQG…
A0A3Z2VFK7_SALET	RHS repeat protein (Fragment)	DSQ58_23625	Salmonella enterica subsp. enterica serovar Braenderup	1010	MYEAARVDDPIYHTSALAGFLIGAIIGIAIIALAAFAFFSCGFLAGLILGFMADQIASGVLQLGEAIGRSIHHTAGKILTGSENVSTNSRPAARAVLSTVKCDNHIAEKRIAQGSENIYINSQPAARKDDHTECDAVIEDGSPNVFLGGGTQTVLEISSEIPDWLRKVVDVLFVVASLLGGLAGAWRQAAKLGTKFGTKCAAKFIGGELTGMAVSEAISGLFSNPVDVTTGQKILLPETDFTLPGRLPVTCSRFYASHLETVGLLGRGWRLNWETSLRDDDEHITLTGVQGRELRYPKTMLTPGHQIFDPEEQLYLSRLHDGRYVLHYTDRSYYVFGDFDSDGMAYLLFMETPHRQRIVFGHEGGRLVRIASSSGHHLLLHRTQTPAGERLSRIELVQG…
A0A3U8HD98_SALET	Type IV secretion protein Rhs (Fragment)	DQK43_23160	Salmonella enterica I	1010	MYEAARVDDPIYHTSALAGFLIGAIIGIAIIALAAFAFFSCGFLAGLILGFMADQIASGVLQLGEAIGRSIHHTAGKILTGSENVSTNSRPAARAVLSTVKCDNHIAEKRIAQGSENIYINSQPAARKDDHTECDAVIEDGSPNVFLGGGTQTVLEISSEIPDWLRKVVDVLFVVASLLGGLAGAWRQAAKLGTKFGTKCAAKFIGGELVGMAVGEAISGLFSNPVDVTTGQKILLPETDFTLPGRLPVTCSRFYASHLETVGLLGRGWRLNWETSLRDDDEHITLTGVQGRELRYPKTMLTPGHQIFDPEEQLYLSRLHDGRYVLHYTDRSYYVFGDFDSDGMAYLLFMETPHRQRIVFGHEGGRLVRIASSSGHHLLLHRTQTPAGERLSRIELVQG…
A0A3V3NXX3_SALER	RHS repeat protein (Fragment)	BU306_22330	Salmonella enterica (Salmonella choleraesuis)	956	MYEAARVDDPIYHTSALAGFLIGAIIGIAIIALAAFAFFSCGFLAGLILGFMAYQIASGVLQLGEAIGRSIHHTAGKILTGSENVSTNSRPAARAVLSTVKCDNHIAEKRIAQGSENIYINSQPAARKDDHTECDAVIEDGSPNVFLGGGTQTVLEISSEIPDWLRKVVDVLFVVASLLGGLAGAWRQAAKLGTKFGTKCAAKFIGGELAGMAVGEAISGLFSNPVDVTTGQKILLPETDFTLPGRLPVTCSRFYASHLETVGLLGRGWRLNWETSLREDDEHITLTGVQGRELCYPKTMLTPGHQIFDPKEQLYLSRLHDGRYVLHYTDRSYYVFGDFDSDGMAYLLFMETPHRQRIVFGHEGGRLVRIASSSGHHLLLHRTQTPAGERLSRIELVQG…
A0A3V6YH72_SALET	RHS repeat protein (Fragment)	AHS86_22865	Salmonella enterica I	1021	MYEAARVDDPIYHTSALAGFLIGAIIGIAIIALAAFAFFSCGFLAGLILGFMADQIASGVLQLGEAIGRSIHHTAGKILTGSENVSTNSRPAARAVLSTVKCDNHIAEKRIAQGSENIYINSQPAARKDDHTECDAVIEDGSPNVFLGGGTQTVLEISSEIPDWLRKVVDVLFVVASLLGGLAGAWRQAAKLGTKFGTKCAAKFIGGELAGMAVGEAISGLFSNPVDVTTGQKILLPETDFTLPGRLPVTCSRFYASHLETVGLLGRGWRLNWETSLREDDEHITLTGVQGRELCYPKTMLTPGHQIFDPEEQLYLSRLHDGRYVLHYTDRSYYVFGDFDSDGMAYLLFMETPHRQRIVFGHEGGRLVRIASSSGHHLLLHRTQTPAGERLSRIELVQG…
A0A3P5DMN0_ECOLX	Putative deoxyribonuclease RhsB (EC 3.1.-.-)	rhsB_1 BANRA_01078	Escherichia coli	1441	MSEGPGGPQGATAGGTLAMRMLSQQAMVASQMKRAANDKAIAQMLASKKSGPPAARLGDEIQHKSFLGALAGAVLGAIVTIAEGCLIMAACATGPYALVLVPALMYASYKASDYVEEKQNQLESWINSFCDTDGAINTGSENVNINGKPAARAAVTLPPPPPPGAIPEVPQGEPSWGDIATDLLESAAEKAVPLAKAWGNAVITLTDSNAGFMDRVSAGASLLFPAGPVLMEFATMVGGRGEIKKDVDFPEAGEDTALCDKENKPPRIAQGSSNVFINNQPAARQGDKLECSAAIVGGSPDVFIGGEQVTYLDIQPEFPPWQRMILGGITIASYLLPPAGLLGKLKNLARLGKLGNLLGKSGKLLGAKLGALLGKTGKSLKSIANKVIRWVTDPVDPVT…
A0A3V2P1C3_SALET	RHS repeat protein (Fragment)	DSF98_25810	Salmonella enterica I	1029	MYEAARVDDPIYHTSALAGFLIGAIIGIAIIALAAFAFFSCGFLAGLILGFMADQIASGVLQLGEAIGRSIHHTAGKILTGSENVSTNSRPAARAVLSTVKCDNHIAEKRIAQGSENIYINSQPAARKDDHTECDAVIEDGSPNVFLGGGTQTVLEISSEIPDWLRKVVDVLFVVASLLGGLAGAWRQAAKLGTKFGTKCAAKFIGGELVGMAVGEAISGLFSNPVDVTTGQKILLPETDFTLPGRLPVTCSRFYASHLETVGLLGRGWRLNWETSLRDDDEHITLTGVQGRELRYPKTMLTPGHQIFDPEEQLYLSRLHDGRYVLHYTDRSYYVFGDFDSDGMAYLLFMETPHCQRIVFGHEGGRLVRIASSSGHHLLLHRTQTPAGERLSRIELVQG…
A0A3U1N7I5_SALET	RHS repeat protein (Fragment)	DN220_22810	Salmonella enterica I	1029	MYEAARVDDPIYHTSALAGFLIGAIIGIAIIALAAFAFFSCGFLAGLILGFMADQIASGVLQLGEAIGRSIHHTAGKILTGSENVSTNSRPAARAVLSTVKCDNHIAEKRIAQGSENIYINSQPAARKDDHTECDAVIEDGSPNVFLGGGTQTVLEISSEIPDWLRKVVDVLFVVASLLGGLAGAWRQAAKLGTKFGTKCAAKFIGGELTGMAVSEAISGLFSNPVDVTTGQKILLPETDFTLPGRLPVTCSRFYASHLETVGLLGRGWRLNWETSLREDDEHITLTGVQGRELRYPKTMLTPGHQIFDPKEQLYLSRLHDGRYVLHYTDRSYYVFGDFDSDGMAYLLFMETPHRQRIVFGHEGGRLVRIASSSGHHLLLHRTQTPAGERLSRIELVQG…
D6I5N8_ECOLX	Rhs core protein (Fragment)	ECDG_00409	Escherichia coli B185	1090	MSEGPGGPQGATAGGTLAMRMLSQQAMVASQMKRAANDKAIAQMLASKKSGPPAARLGDEIQHKSFLGALAGAVLGAIVTIAEGCLIMAACATGPYALVLVPALMYASYKASDYVEEKQNQLESWINSFCDTDGAINTGSENVKINGKPAARAAVTLPPPPPPGAIPEVPQGEPSWGDIATDLLESAAEKAVPLAKAWGNAVITLTDSNASFMDRVSAGASLLFPSGPVLMEFATMVGGRGEIKKDVDFPEAGEDTALCDKENKPPRIAQGSSNVFINNQPAARQGDKLECSAAIVEGSPDVFIGGEQVTYLDIQPEFPPWQRMILGGITIASYLLPPAGLLGKLGNLAKLGKLGNLLGKSGKLLGAKLGALLGKTGKSLKSIANKVIRWVTDPVDPVT…
A0A3X8XDQ6_SALET	RHS repeat protein (Fragment)	D7N72_23540	Salmonella enterica I	1032	MYEAARVDDPIYHTSALAGFLIGAIIGIAIIALAAFAFFSCGFLAGLILGFMADQIASGVLQLGEAIGRSIHHTAGKILTGSENVSTNSRPAARAVLSTVKCDNHIAEKRIAQGSENIYINSQPAARKDDHTECDAVIEDGSPNVFLGGGTQTVLEISSEIPDWLRKVVDVLFVVASLLGGLAGAWRQAAKLGTKFGTKCAAKFIGGELTGMAVSEAISGLFSNPVDVTTGQKILLPETDFTLPGRLPVTCSRFYASHLETVGLLGRGWRLNWETSLRDDDEHITLTGVQGRELRYPKTMLTPGHQIFDPEEQLYLSRLHDGRYVLHYTDRSYYVFGDFDSDGMAYLLFMETPHRQRIVFGHEGGRLVRIASSSGHHLLLHRTQTPAGERLSRIELVQG…
A0A3U3P348_SALET	RHS repeat protein (Fragment)	DOW57_22160	Salmonella enterica I	1035	MYEAARVDDPIYHTSALAGFLIGAIIGIAIIALAAFAFFSCGFLAGLILGFMADQIASGVLQLGEAIGRSIHHTAGKILTGSENVSTNSRPAARAVLSTVKCDNHIAEKRIAQGSENIYINSQPAARKDDHTECDAVIEDGSPNVFLGGGTQTVLEISSEIPDWLRKVVDVLFVVASLLGGLAGAWRQAAKLGTKFGTKCAAKFIGGELTGMAVSEAISGLFSNPVDVTTGQKILLPETDFTLPGRLPVTCSRFYASHLETVGLLGRGWRLNWETSLREDDEHITLTGVQGRELRYPKTMLTPGHQIFDPKEQLYLSRLHDGRYVLHYTDRSYYVFGDFDSDGMAYLLFMETPHRQRIVFGHEGGRLVRIASSSGHHLLLHRTQTPAGERLSRIELVQG…
A0A3U4IZW2_SALET	RHS repeat protein (Fragment)	DPA45_23235	Salmonella enterica I	1041	MYEAARVDDPIYHTSALAGFLIGAIIGIAIIALAAFAFFSCGFLAGLILGFMADQIASGVLQLGEAIGRSIHHTAGKILTGSENVSTNSRPAARAVLSTVKCDNHIAEKRIAQGSENIYINSQPAARKDDHTECDAVIEDGSPNVFLGGGTQTVLEISSEIPDWLRKVVDVLFVVASLLGGLAGAWRQAAKLGTKFGTKCAAKFIGGELVGMAVGEAISGLFSNPVDVTTGQKILLPETDFTLPGRLPVTCSRFYASHLETVGLLGRGWRLNWETSLREDDEHITLTGVQGRELRYPKTMLTPGHQIFDPKEQLYLSRLHDGRYVLHYTDRSYYVFGDFDSDGMAYLLFMETPHRQRIVFGHEGGRLVRIASSSGHHLLLHRTQTPAGERLSRIELVQG…
A0A3X7XL56_SALER	RHS repeat protein	EG177_20420	Salmonella enterica (Salmonella choleraesuis)	1042	MYEAARVDDPIYHTSALAGFLIGAIIGIAIIALAAFAFFSCGFLAGLILGFMADQIASGVLQLGEAIGRSNHHTAGKILTGSENVSTNSRPAARAVLSTVKCDNHIAEKRIAQGSENIYINSQPAARKDDHTECDAVIEDGSPNVFLGGGTQTVLEISSEIPDWLRKVVDVLFVVASLLGGLAGAWRQAAKLGTKFGTKCAAKFIGGELVGMAVGEAISGLFSNPVDVTTGQKILLPETDFTLPGRLPVTCSRFYASHLETVGLLGRGWRLNWETSLREDDEHITLTGVQGRELRYPKTMLTPGHQIFDPEEQLYLSRLHDGRYVLHYTDRSYYVFGDFDSDGMAYLLFMETPHRQRIVFGHEGGRLVRIASSSGHHLLLHRTQTPAGERLSRIELVQG…
A0A3V4QCX7_SALTH	RHS repeat protein (Fragment)	NG15_19925	Salmonella thompson	1048	MYEAARVDDPIYHTSALAGFLIGAIIGIAIIALAAFAFFSCGFLAGLILGFMADQIASGVLQLGEAIGRSIHHTAGKILTGSENVSTNSRPAARAVLSTVKCDNHIAEKRIAQGSENIYINSQPAARKDDHTECDAVIEDGSPNVFLGGGTQTVLEISSEIPDWLRKVVDVLFVVASLLGGLAGAWRQAAKLGTKFGTKCAAKFIGGELTGMAVSEAISGLFSNPVDVTTGQKILLPETDFTLPGRLPVTCSRFYASHLETVGLLGRGWRLNWETSLREDDEHITLTGVQGRELRYPKTMLTPGHQIFDPKEQLYLSRLHDGRYVLHYTDRSYYVFGDFDSDGMAYLLFMETPHRQRIVFGHEGGRLVRIASSSGHHLLLHRTQTPAGERLSRIELVQG…
A0A3Z4CC85_SALET	RHS repeat protein (Fragment)	EF694_23235	Salmonella enterica I	1073	MYEAARVDDPIYHTSALAGFLIGAIIGIAIIALAAFAFFSCGFLAGLILGFMADQIASGVLQLGEAIGRSIHHTAGKILTGSENVSTNSRPAARAVLSTVKCDNHIAEKRIAQGSENIYINSQPAARKDDHTECDAVIEDGSPNVFLGGGTQTVLEISSEIPDWLRKVVDVLFVVASLLGGLAGAWRQAAKLGTKFGTKCAAKFIGGELTGMAVSEAISGLFSNPVDVTTGQKILLPETDFTLPGRLPVTCSRFYASHLETVGLLGRGWRLNWETSLRDDDEHITLTGVQGRELRYPKTMLTPGHQIFDPEEQLYLSRLHDGRYVLHYTDRSYYVFGDFDSDGMAYLLFMETPHRQRIVFGHEGGRLVRIASSSGHHLLLHRTQTPAGERLSRIELVQG…
A0A3Y6H8R0_SALET	RHS repeat protein (Fragment)	DFR01_21795	Salmonella enterica I	1082	MYEAARVDDPIYHTSALAGFLIGAIIGIAIIALAAFAFFSCGFLAGLILGFMADQIASGVLQLGEAIGRSIHHTAGKILTGSENVSTNSRPAARAVLSTVKCDNHIAEKRIAQGSENIYINSQPAARKDDHTECDAVIEDGSPNVFLGGGTQTVLEISSEIPDWLRKVVDVLFVVASLLGGLAGAWRQAAKLGTKFGTKCAAKFIGGELTGMAVSEAISGLFSNPVDVTTGQKILLPETDFTLPGRLPVTCSRFYASHLETVGLLGRGWRLNWETSLREDDEHITLTGVQGRELRYPKTMLTPGHQIFDPKEQLYLSRLHDGRYVLHYTDRSYYVFGDFDSDGMAYLLFMETPHRQRIVFGHEGGRLVRIASSSGHHLLLHRTQTPAGERLSRIELVQG…
A0A402SVH2_SALER	RHS repeat protein (Fragment)	ATQ15_23505	Salmonella enterica (Salmonella choleraesuis)	1082	MYEAARVDDPIYHTSALAGFLIGAIIGIAIIALAAFAFFSCGFLAGLILGFMADQIASGVLQLGEAIGRSIHHTAGKILTGSENVSTNSRPAARAVLSTVKCDHHIAEKRIAQGSENIYINSQPAARKDDHTECDAVIEDGSPNVFLGGGTQTVLEISSEIPDWLRKVVDVLFVVASLLGGLAGAWRQAAKLGTKFGTKCAAKFIGGELAGMAVGEAISGLFSNPVDVTTGQKILLPETDFTLPGRLPVTCSRFYASHLETVGLLGRGWRLNWETSLREDDEHITLTGVQGRELCYPKTMLTPGHQIFDPEEQLYLSRLHDGRYVLHYTDRSYYVFGDFDSDGMAYLLFMETPHRQRIVFGHEGGRLVRIASSSGHHLLLHRTQTPAGERLSRIELVQG…
A0A3X7BHM2_SALER	RHS repeat protein (Fragment)	EAT75_22330	Salmonella enterica (Salmonella choleraesuis)	1083	MYEAARVDDPIYHTSALAGFLIGAIIGIAIIALAAFAFFSCGFLAGLILGFMADQIASGVLQLGEAIGRSIHHTAGKILTGSENVSTNSRPAARAVLSTVKCDNHIAEKRIAQGSENIYINSQPAARKDDHTECDAVIEDGSPNVFLGGGTQTVLEISSEIPDWLRKVVDVLFVVASLLGGLAGAWRQAAKLGTKFGTKCAAKFIGGELVGMAVGEAISGLFSNPVDVTTGQKILLPETDFTLPGRLPVTCSRFYASHLETVGLLGRGWRLNWETSLRDDDEHITLTGVQGRELRYPKTMLTPGHQIFDPEEQLYLSRLHDGRYVLHYTDRSYYVFGDFDSDGMAYLLFMETPHRQRIVFGHEGGRLVRIASSSGHHLLLHRTQTPAGERLSRIELVQG…
A0A3U9IAP3_SALET	RHS repeat protein (Fragment)	DQS26_22700 DRE16_22385	Salmonella enterica I	1083	MYEAARVDDPIYHTSALAGFLIGAIIGIAIIALAAFAFFSCGFLAGLILGFMADQIASGVLQLGEAIGRSIHHTAGKILTGSENVSTNSRPAARAVLSTVKCDNHIAEKRIAQGSENIYINSQPAARKDDHTECDAVIEDGSPNVFLGGGTQTVLEISSEIPDWLRKVVDVLFVVASLLGGLAGAWRQAAKLGTKFGTKCAAKFIGGELTGMAVSEAISGLFSNPVDVTTGQKILLPETDFTLPGRLPVTCSRFYASHLETVGLLGRGWRLNWETSLREDDEHITLTGVQGRELRYPKTMLTPGHQIFDPKEQLYLSRLHDGRYVLHYTDRSYYVFGDFDSDGMAYLLFMETPHRQRIVFGHEGGRLVRIASSSGHHLLLHRTQTPAGERLSRIELVQG…
A0A3T8B4Y4_SALET	Type IV secretion protein Rhs (Fragment)	DM323_22435	Salmonella enterica I	1083	MYEAARVDDPIYHTSALAGFLIGAIIGIAIIALAAFAFFSCGFLAGLILGFMADQIASGVLQLGEAIGRSIHHTAGKILTGSENVSTNSRPAARAVLSTVKCDNHIAEKRIAQGSENIYINSQPAARKDDHTECDAVIEDGSPNVFLGGGTQTVLEISSEIPDWLRKVVDVLFVVASLLGGLAGAWRQAAKLGTKFGTKCAAKFIGGELVGMAVGEAISGLFSNPVDVTTGQKILLPETDFTLPGRLPVTCSRFYASHLETVGLLGRGWRLNWETSLRDDDEHITLTGVQGRELRYPKTMLTPGHQIFDPEEQLYLSRLHDGRYVLHYTDRSYYVFGDFDSDGMAYLLFMETPHRQRIVFGHEGGRLVRIASSSGHHLLLHRTQTPAGERLSRIELVQG…
A0A3Z2FA57_SALTU	RHS repeat protein (Fragment)	AVD13_19755	Salmonella typhimurium (strain ATCC 68169 / UK-1)	1083	MYEAARVDDPIYHTSALAGFLIGAIIGIAIIALAAFAFFSCGFLAGLILGFMADQIASGVLQLGEAIGRSIHHTAGKILTGSENVSTNSRPAARAVLSTVKCDNHIAEKRIAQGSENIYINSQPAARKDDHTECDAVIEDGSPNVFLGGGTQTVLEISSEIPDWLRKVVDVLFVVASLLGGLAGAWRQAAKLGTKFGTKCAAKFIGGELVGMAVGEAISGLFSNPVDVTTGQKILLPETDFTLPGRLPVTCSRFYASHLETVGLLGRGWRLNWETSLRDDDEHITLTGVQGRELRYPKTMLTPGHQIFDPEEQLYLSRLHDGRYVLHYTDRSYYVFGDFDSDGMAYLLFMETPHRQRIVFGHEGGRLVRIASSSGHHLLLHRTQTPAGERLSRIELVQG…
A0A3Z5UK78_SALTM	RHS repeat protein (Fragment)	EGU67_22075 ZB89_23135 ZC54_22760	Salmonella typhimurium	1083	MYEAARVDDPIYHTSALAGFLIGAIIGIAIIALAAFAFFSCGFLAGLILGFMADQIASGVLQLGEAIGRSIHHTAGKILTGSENVSTNSRPAARAVLSTVKCDNHIAEKRIAQGSENIYINSQPAARKDDHTECDAVIEDGSPNVFLGGGTQTVLEISSEIPDWLRKVVDVLFVVASLLGGLAGAWRQAAKLGTKFGTKCAAKFIGGELVGMAVGEAISGLFSNPVDVTTGQKILLPETDFTLPGRLPVTCSRFYASHLETVGLLGRGWRLNWETSLRDDDEHITLTGVQGRELRYPKTMLTPGHQIFDPEEQLYLSRLHDGRYVLHYTDRSYYVFGDFDSDGMAYLLFMETPHRQRIVFGHEGGRLVRIASSSGHHLLLHRTQTPAGERLSRIELVQG…
A0A3Z6P2S1_SALTU	RHS repeat protein (Fragment)	AU596_17535	Salmonella typhimurium (strain ATCC 68169 / UK-1)	1083	MYEAARVDDPIYHTSALAGFLIGAIIGIAIIALAAFAFFSCGFLAGLILGFMADQIASGVLQLGEAIGRSIHHTAGKILTGSENVSTNSRPAARAVLSTVKCDNHIAEKRIAQGSENIYINSQPAARKDDHTECDAVIEDGSPNVFLGGGTQTVLEISSEIPDWLRKVVDVLFVVASLLGGLAGAWRQAAKLGTKFGTKCAAKFIGGELVGMAVGEAISGLFSNPVDVTTGQKILLPETDFTLPGRLPVTCSRFYASHLETVGLLGRGWRLNWETSLRDDDEHITLTGVQGRELRYPKTMLTPGHQIFDPEEQLYLSRLHDGRYVLHYTDRSYYVFGDFDSDGMAYLLFMETPHRQRIVFGHEGGRLVRIASSSGHHLLLHRTQTPAGERLSRIELVQG…
A0A3Y7XAE4_SALET	RHS repeat protein (Type IV secretion protein Rhs) (Fragment)	CPY04_24600 D4E59_23155 D4E64_23565 D4Y27_22650 D5836_23070 D5A65_23625 D5C00_23025 D5P71_23705 D5Q05_22505 D6S45_22510 D6S74_22885 D7N26_22610 D7O77_22705 D9P13_23135 DK687_22435 DLM10_22955 DLQ92_24355 DN362_23235 DNU17_22515 DOA55_23650 DOV77_21770 DPA01_21470 DPE40_22490 DPP70_22215 DQC12_24360 DRM43_22170 DRT76_22740 DRV17_22985 DS336_22665 DS651_20475 DSG69_22555 DSN18_23040 DTG80_23235 DTT…	Salmonella enterica I	1083	MYEAARVDDPIYHTSALAGFLIGAIIGIAIIALAAFAFFSCGFLAGLILGFMADQIASGVLQLGEAIGRSIHHTAGKILTGSENVSTNSRPAARAVLSTVKCDNHIAEKRIAQGSENIYINSQPAARKDDHTECDAVIEDGSPNVFLGGGTQTVLEISSEIPDWLRKVVDVLFVVASLLGGLAGAWRQAAKLGTKFGTKCAAKFIGGELVGMAVGEAISGLFSNPVDVTTGQKILLPETDFTLPGRLPVTCSRFYASHLETVGLLGRGWRLNWETSLRDDDEHITLTGVQGRELRYPKTMLTPGHQIFDPEEQLYLSRLHDGRYVLHYTDRSYYVFGDFDSDGMAYLLFMETPHRQRIVFGHEGGRLVRIASSSGHHLLLHRTQTPAGERLSRIELVQG…
A0A3Y6AEC9_SALET	RHS repeat protein (Fragment)	EDL36_23125	Salmonella enterica I	1086	MYEAARVDDPIYHTSALAGFLIGAIIGIAIIALAAFAFFSCGFLAGLILGFMADQIASGVLQLGEAIGRSIHHTAGKILTGSENVSTNSRPAARAVLSTVKCDNHIAEKRIAQGSENIYINSQPAARKDDHTECDAVIEDGSPNVFLGGGTQTVLEISSEIPDWLRKVVDVLFVVASLLGGLAGAWRQAAKLGTKFGTKCAAKFIGGELVGMAVGEAISGLFSNPVDVTTGQKILLPETDFTLPGRLPVTCSRFYASHLETVGLLGRGWRLNWETSLRDDDEHITLTGVQGRELRYPKTMLTPGHQIFDPEEQLYLSRLHDGRYVLHYTDRSYYVFGDFDSDGMAYLLFMETPHRQRIVFGHEGGRLVRIASSSGHHLLLHRTQTPAGERLSRIELVQG…
A0A3U7WQN9_SALET	RHS repeat protein (Fragment)	DQD59_24605	Salmonella enterica I	1090	MYEAARVDDPIYHTSALAGFLIGAIIGIAIIALAAFAFFSCGFLAGLILGFMADQIASGVLQLGEAIGRSIHHTAGKILTGSENVSTNSRPAARAVLSTVKCDNHIAEKRIAQGSENIYINSQPAARKDDHTECDAVIEDGSPNVFLGGGTQTVLEISSEIPDWLRKVVDVLFVVASLLGGLAGAWRQAAKLGTKFGTKCAAKFIGGELVGMAVGEAISGLFSNPVDVTTGQKILLPETDFTLPGRLPVTCSRFYASHLETVGLLGRGWRLNWETSLRDDDEHITLTGVQGRELRYPKTMLTPGHQIFDPEEQLYLSRLHDGRYVLHYTDRSYYVFGDFDSDGMAYLLFMETPHRQRIVFGHEGGRLVRIASSSGHHLLLHRTQTPAGERLSRIELVQG…
A0A3U8XGJ2_SALET	RHS repeat protein (Fragment)	DQR74_24120	Salmonella enterica I	1091	MYEAARVDDPIYHTSALAGFLIGAIIGIAIIALAAFAFFSCGFLAGLILGFMADQIASGVLQLGEAIGRSIHHTAGKILTGSENVSTNSRPAARAVLSTVKCDNHIAEKRIAQGSENIYINSQPAARKDDHTECDAVIEDGSPNVFLGGGTQTVLEISSEIPDWLRKVVDVLFVVASLLGGLAGAWRQAAKLGTKFGTKCAAKFIGGELVGMAVGEAISGLFSNPVDVTTGQKILLPETDFTLPGRLPVTCSRFYASHLETVGLLGRGWRLNWETSLRDDDEHITLTGVQGRELRYPKTMLTPGHQIFDPEEQLYLSRLHDGRYVLHYTDRSYYVFGDFDSDGMAYLLFMETPHRQRIVFGHEGGRLVRIASSSGHHLLLHRTQTPAGERLSRIELVQG…
A0A3U3JXU7_SALET	RHS repeat protein (Fragment)	DOR51_24490	Salmonella enterica I	1097	MYEAARVDDPIYHTSALAGFLIGAIIGIAIIALAAFAFFSCGFLAGLILGFMADQIASGVLQLGEAIGRSIHHTAGKILTGSENVSTNSRPAARAVLSTVKCDNHIAEKRIAQGSENIYINSQPAARKDDHTECDAVIEDGSPNVFLGGGTQTVLEISSEIPDWLRKVVDVLFVVASLLGGLAGAWRQAAKLGTKFGTKCAAKFIGGELVGMAVGEAISGLFSNPVDVTTGQKILLPETDFTLPGRLPVTCSRFYASHLETVGLLGRGWRLNWETSLRDDDEHITLTGVQGRELRYPKTMLTPGHQIFDPEEQLYLSRLHDGRYVLHYTDRSYYVFGDFDSDGMAYLLFMETPHRQRIVFGHEGGRLVRIASSSGHHLLLHRTQTPAGERLSRIELVQG…
A0A3U8LLJ9_SALER	RHS repeat protein (Fragment)	AHL33_23090	Salmonella enterica (Salmonella choleraesuis)	1099	MYEAARVDDPIYHTSALAGFLIGAIIGIAIIALAAFAFFSCGFLAGLILGFMADQIASGVLQLGEAIGRSIHHTAGKILTGSENVSTNSRPAARAVLSTVKCDNHIAEKRIAQGSENIYINSQPAARKDDHTECDAVIEDGSPNVFLGGGTQTVLEISSEIPDWLRKVVDVLFVVASLLGGLAGAWRQAAKLGTKFGTKCAAKFIGGELTGMAVSEAISGLFSNPVDVTTGQKILLPETDFTLPGRLPVTCSRFYASHLETVGLLGRGWRLNWETSLREDDEHITLTGVQGRELRYPKTMLTPGHQIFDPKEQLYLSRLHDGRYVLHYTDRSYYVFGDFDSDGMAYLLFMETPHRQRIVFGHEGGRLVRIASSSGHHLLLHRTQTPAGERLSRIELVQG…
A0A3U7T3G7_SALET	RHS repeat protein (Fragment)	DQE08_17825 DU916_19235	Salmonella enterica I	1111	MYEAARVDDPIYHTSALAGFLIGAIIGIAIIALAAFAFFSCGFLAGLILGFMADQIASGVLQLGEAIGRSIHHTAGKILTGSENVSTNSRPAARAVLSTVKCDNHIAEKRIAQGSENIYINSQPAARKDDHTECDAVIEDGSPNVFLGGGTQTVLEISSEIPDWLRKVVDVLFVVASLLGGLAGAWRQAAKLGTKFGTKCAAKFIGGELVGMAVGEAISGLFSNPVDVTTGQKILLPETDFTLPGRLPVTCSRFYASHLETVGLLGRGWRLNWETSLRDDDEHITLTGVQGRELRYPKTMLTPGHQIFDPEEQLYLSRLHDGRYVLHYTDRSYYVFGDFDSDGMAYLLFMETPHRQRIVFGHEGGRLVRIASSSGHHLLLHRTQTPAGERLSRIELVQG…
A0A3Y7VNP9_SALET	RHS repeat protein (Fragment)	DRX22_23570 ED446_23505	Salmonella enterica I	1114	MYEAARVDDPIYHTSALAGFLIGAIIGIAIIALAAFAFFSCGFLAGLILGFMADQIASGVLQLGEAIGRSIHHTAGKILTGSENVSTNSRPAARAVLSTVKCDNHIAEKRIAQGSENIYINSQPAARKDDHTECDAVIEDGSPNVFLGGGTQTVLEISSEIPDWLRKVVDVLFVVASLLGGLAGAWRQAAKLGTKFGTKCAAKFIGGELTGMAVSEAISGLFSNPVDVTTGQKILLPETDFTLPGRLPVTCSRFYASHLETVGLLGRGWRLNWETSLRDDDEHITLTGVQGRELRYPKTMLTPGHQIFDPEEQLYLSRLHDGRYVLHYTDRSYYVFGDFDSDGMAYLLFMETPHRQRIVFGHEGGRLVRIASSSGHHLLLHRTQTPAGERLSRIELVQG…
A0A3X4JTE4_SALER	RHS repeat protein (Fragment)	EGD07_22030	Salmonella enterica (Salmonella choleraesuis)	1114	MYEAARVDDPIYHTSALAGFLIGAIIGIAIIALAAFAFFSCGFLAGLILGFMADQIASGVLQLGEAIGRSIHHTAGKILTGSENVSTNSRPAARAVLSTVKCDNHIAEKRIAQGSENIYINSQPAARKDDHTECDAVIEDGSPNVFLGGGTQTVLEISSEIPDWLRKVVDVLFVVASLLGGLAGAWRQAAKLGTKFGTKCAAKFIGGELVGMAVGEAISGLFSNPVDVTTGQKILLPETDFTLPGRLPVTCSRFYASHLETVGLLGRGWRLNWETSLRDDDEHITLTGVQGRELRYPKTMLTPGHQIFDPEEQLYLSRLHDGRYVLHYTDRSYYVFGDFDSDGMAYLLFMETPHRQRIVFGHEGGRLVRIASSSGHHLLLHRTQTPAGERLSRIELVQG…
A0A3Y5YEG3_SALTM	RHS repeat protein (Fragment)	YI33_22055	Salmonella typhimurium	1114	MYEAARVDDPIYHTSALAGFLIGAIIGIAIIALAAFAFFSCGFLAGLILGFMADQIASGVLQLGEAIGRSIHHTAGKILTGSENVSTNSRPAARAVLSTVKCDNHIAEKRIAQGSENIYINSQPAARKDDHTECDAVIEDGSPNVFLGGGTQTVLEISSEIPDWLRKVVDVLFVVASLLGGLAGAWRQAAKLGTKFGTKCAAKFIGGELVGMAVGEAISGLFSNPVDVTTGQKILLPETDFTLPGRLPVTCSRFYASHLETVGLLGRGWRLNWETSLRDDDEHITLTGVQGRELRYPKTMLTPGHQIFDPEEQLYLSRLHDGRYVLHYTDRSYYVFGDFDSDGMAYLLFMETPHRQRIVFGHEGGRLVRIASSSGHHLLLHRTQTPAGERLSRIELVQG…
A0A3X4W4T0_SALER	RHS repeat protein (Fragment)	D7D06_18565	Salmonella enterica (Salmonella choleraesuis)	1115	MYEAARVDDPIYHTSALAGFLIGAIIGIAIIALAAFAFFSCGFLAGLILGFMADQIASGVLQLGEAIGRSIHHTAGKILTGSENVSTNSRPAARAVLSTVKCDNHIAEKRIAQGSENIYINSQPAARKDDHTECDAVIEDGSPNVFLGGGTQTVLEISSEIPDWLRKVVDVLFVVASLLGGLAGAWRQAAKLGTKFGTKCAAKFIGGELTGMAVSEAISGLFSNPVDVTTGQKILLPETDFTLPGRLPVTCSRFYASHLETVGLLGRGWRLNWETSLRDDDEHITLTGVQGRELRYPKTMLTPGHQIFDPEEQLYLSRLHDGRYVLHYTDRSYYVFGDFDSDGMAYLLFMETPHRQRIVFGHEGGRLVRIASSSGHHLLLHRTQTPAGERLSRIELVQG…
A0A3V7XXV9_SALER	RHS repeat protein (Fragment)	EA033_23115	Salmonella enterica (Salmonella choleraesuis)	1120	MYEAARVDDPIYHTSALAGFLIGAIIGIAIIALAAFAFFSCGFLAGLILGFMADQIASGVLQLGEAIGRSIHHTAGKILTGSENVSTNSRPAARAVLSTVKCDHHIAEKRIAQGSENIYINSQPAARKDDHTECDAVIEDGSPNVFLGGGTQTVLEISSEIPDWLRKVVDVLFVVASLLGGLAGAWRQAAKLGTKFGTKCAAKFIGGELAGMAVGEAISGLFSNPVDVTTGQKILLPETDFTLPGRLPVTCSRFYASHLETVGLLGRGWRLNWETSLREDDEHITLTGVQGRELCYPKTMLTPGHQIFDPEEQLYLSRRHDGRYVLHYTDRSYYVFGDFDSDGMAYLLFMETPHRQRIVFGHEGGRLVRIASSSGHHLLLHRTQTPAGERLSRIELVQG…
A0A3T9YY48_SALTM	RHS repeat protein (Fragment)	C2253_21880	Salmonella typhimurium	1121	MYEAARVDDPIYHTSALAGFLIGAIIGIAIIALAAFAFFSCGFLAGLILGFMADQIASGVLQLGEAIGRSIHHTAGKILTGSENVSTNSRPAARAVLSTVKCDNHIAEKRIAQGSENIYINSQPAARKDDHTECDAVIEDGSPNVFLGGGTQTVLEISSEIPDWLRKVVDVLFVVASLLGGLAGAWRQAAKLGTKFGTKCAAKFIGGELVGMAVGEAISGLFSNPVDVTTGQKILLPETDFTLPGRLPVTCSRFYASHLETVGLLGRGWRLNWETSLRDDDEHITLTGVQGRELRYPKTMLTPGHQIFDPEEQLYLSRLHDGRYVLHYTDRSYYVFGDFDSDGMAYLLFMETPHRQRIVFGHEGGRLVRIASSSGHHLLLHRTQTPAGERLSRIELVQG…
A0A3U2QV40_SALET	RHS repeat protein (Fragment)	DOC31_24080	Salmonella enterica I	1122	MYEAARVDDPIYHTSALAGFLIGAIIGIAIIALAAFAFFSCGFLAGLILGFMADQIASGVLQLGEAIGRSIHHTAGKILTGSENVSTNSRPAARAVLSTVKCDNHIAEKRIAQGSENIYINSQPAARKDDHTECDAVIEDGSPNVFLGGGTQTVLEISSEIPDWLRKVVDVLFVVASLLGGLAGAWRQAAKLGTKFGTKCAAKFIGGELVGMAVGEAISGLFSNPVDVTTGQKILLPETDFTLPGRLPVTCSRFYASHLETVGLLGRGWRLNWETSLRDDDEHITLTGVQGRELRYPKTMLTPGHQIFDPEEQLYLSRLHDGRYVLHYTDRSYYVFGDFDSDGMAYLLFMETPHRQRIVFGHEGGRLVRIASSSGHHLLLHRTQTPAGERLSRIELVQG…
A0A3U1V9G6_ECOLX	Type IV secretion protein Rhs	DOT59_12515 EHD79_25710	Escherichia coli	1505	MSEGPGGPQGATAGGTLAMRMLSQQAMVASQMKRAANDKAIAQMLASKKSGPPAARLGDEIQHKSFLGALAGAVLGAIVTIAEGCLIMAACATGPYALVLVPALMYASYKASDYVEEKQNQLESWINSFCDTDGAINTGSENVKINGKPAARAAVTLPPPPPPGAIPEVPQGEPSWGDIATDLLESAAEKAVPLAKAWGNAVITLTDSNAGFMDRVSAGASLLFPAGPVLMEFATMVGGRGEIKKDVDFPEAGEDTALCDKENKPPRIAQGSSNVFINNQPAARQGDKLECSAAIVGGSPDVFIGGEQVTYLDIQPEFPPWQRMILGGITIASYLLPPAGLLGKLKNLARLGKLGNLLGKSGKLLGAKLGALLGKTGKSLKSIANKVIRWVTDPVDPVT…
A0A2T8WWN4_SALET	Type IV secretion protein Rhs (Fragment)	C4855_23810	Salmonella enterica subsp. enterica serovar Gaminara	1125	MYEAARVDDPIYHTSALAGFLIGAIIGIAIIALAAFAFFSCGFLAGLILGFMADQIASGVLQLGEAIGRSIHHTAGKILTGSENVSTNSRPAARAVLSTVKCDHHIAEKRIAQGSENIYINSQPAARKDDHTECDAVIEDGSPNVFLGGGTQTVLEISSEIPDWLRKVVDVLFVVASLLGGLAGAWRQAAKLGTKFGTKCAAKFIGGELAGMAVGEAISGLFSNPVDVTTGQKILLPETDFTLPGRLPVTCSRFYASHLETVGLLGRGWRLNWETSLREDDEHITLTGVQGRELCYPKTMLTPGHQIFDPEEQLYLSRLHDGRYVLHYTDRSYYVFGDFDSDGMAYLLFMETPHRQRIVFGHEGGRLVRIASSSGHHLLLHRTQTPAGERLSRIELVQG…
A0A118RSL8_9BURK	Uncharacterized protein (Fragment)	WJ75_22155	Burkholderia ubonensis	1370	MFEAARVTDPIEHTSALAGFLIGAIIGVALIAAVAFATFTCGFGVALLAGLVAGVGAGAILSLGEAIGKMFSSPSGAIVTGSANVFINGKPAAYATLSGTACDKHNPVPLVAQGSTNVFINGRPAARKDDKITCGAAIGDGSHDTFIHGGTETYLPVDDEVPPWLRTTVDWAFALAGLVGGLAGLVKAAGGLSRAVLPCAAKFIGGFVLGEAVGRYVAGPAINRAIGGMFGNPVDVTTGRKILLAESETDYVIPAPLPVAIKRFYSSGLDHVGTLGRGWVLPWDLRLQARDGRLWYTDAQGRESGFPLVRNGQSSFSESEQRYLTCTPDGRYVLHDVGETYYDFGRLDPDTDRIAWVRRIEDQAGQWTQFERDSQGRVREILTCGGIQAVLDYEAVHGR…
A0A3Z6BCI2_SALET	RHS repeat protein (Fragment)	DUQ58_19695	Salmonella enterica I	1127	MYEAARVDDPIYHTSALAGFLIGAIIGIAIIALAAFAFFSCGFLAGLILGFMADQIASGVLQLGEAIGRSIHHTAGKILTGSENVSTNSRPAARAVLSTVKCDNHIAEKRIAQGSENIYINSQPAARKDDHTECDAVIEDGSPNVFLGGGTQTVLEISSEIPDWLRKVVDVLFVVASLLGGLAGAWRQAAKLGTKFGTKCAAKFIGGELVGMAVGEAISGLFSNPVDVTTGQKILLPETDFTLPGRLPVTCSRFYASHLETVGLLGRGWRLNWETSLRDDDEHITLTGVQGRELRYPKTMLTPGHQIFDPEEQLYLSRLHDGRYVLHYTDRSYYVFGDFDSDGMAYLLFMETPHRQRIVFGHEGGRLVRIASSSGHHLLLHRTQTPAGERLSRIELVQG…
A0A3Z3L4V3_SALET	RHS repeat protein (Fragment)	D7N83_23440	Salmonella enterica I	1127	MYEAARVDDPIYHTSALAGFLIGAIIGIAIIALAAFAFFSCGFLAGLILGFMADQIASGVLQLGEAIGRSIHHTAGKILTGSENVSTNSRPAARAVLSTVKCDNHIAEKRIAQGSENIYINSQPAARKDDHTECDAVIEDGSPNVFLGGGTQTVLEISSEIPDWLRKVVDVLFVVASLLGGLAGAWRQAAKLGTKFGTKCAAKFIGGELTGMAVSEAISGLFSNPVDVTTGQKILLPETDFTLPGRLPVTCSRFYASHLETVGLLGRGWRLNWETSLRDDDEHITLTGVQGRELRYPKTMLTPGHQIFDPEEQLYLSRLHDGRYVLHYTDRSYYVFGDFDSDGMAYLLFMETPHRQRIVFGHEGGRLVRIASSSGHHLLLHRTQTPAGERLSRIELVQG…
A0A3Y5R066_SALET	RHS repeat protein (Fragment)	DS168_22555	Salmonella enterica I	1128	MYEAARVDDPIYHTSALAGFLIGAIIGIAIIALAAFAFFSCGFLAGLILGFMADQIASGVLQLGEAIGRSIHHTAGKILTGSENVSTNSRPAARAVLSTVKCDNHIAEKRIAQGSENIYINSQPAARKDDHTECDAVIEDGSPNVFLGGGTQTVLEISSEIPDWLRKVVDVLFVVASLLGGLAGAWRQAAKLGTKFGTKCAAKFIGGELVGMAVGEAISGLFSNPVDVTTGQKILLPETDFTLPGRLPVTCSRFYASHLETVGLLGRGWRLNWETSLRDDDEHITLTGVQGRELRYPKTMLTPGHQIFDPEEQLYLSRLHDGRYVLHYTDRSYYVFGDFDSDGMAYLLFMETPHRQRIVFGHEGGRLVRIASSSGHHLLLHRTQTPAGERLSRIELVQG…
A0A3W6J3X7_SALER	RHS repeat protein (Fragment)	EIS08_22325	Salmonella enterica (Salmonella choleraesuis)	1136	MYEAARVDDPIYHTSALAGFLIGAIIGIAIIALAAFAFFSCGFLAGLILGFMADQIASGVLQLGEAIGRSIHHTAGKILTGSENVSTNSRPAARAVLSTVKCDNHIAEKRIAQGSENIYINSQPAARKDDHTECDAVIEDGSPNVFLGGGTQTVLEISSEIPDWLRKVVDVLFVVASLLGGLAGAWRQAAKLGTKFGTKCAAKFIGGELVGMAVGEAISGLFSNPVDVTTGQKILLPETDFTLPGRLPVTCSRFYASHLETVGLLGRGWRLNWETSLRDDDEHITLTGVQGRELRYPKTMLTPGHQIFDPEEQLYLSRLHDGRYVLHYTDRSYYVFGDFDSDGMAYLLFMETPHRQRIVFGHEGGRLVRIASSSGHHLLLHRTQTPAGERLSRIELVQG…
A0A3X9HTS2_SALET	RHS repeat protein (Fragment)	D5P09_23785	Salmonella enterica I	1136	MYEAARVDDPIYHTSALAGFLIGAIIGIAIIALAAFAFFSCGFLAGLILGFMADQIASGVLQLGEAIGRSIHHTAGKILTGSENVSTNSRPAARAVLSTVKCDNHIAEKRIAQGSENIYINSQPAARKDDHTECDAVIEDGSPNVFLGGGTQTVLEISSEIPDWLRKVVDVLFVVASLLGGLAGAWRQAAKLGTKFGTKCAAKFIGGELVGMAVGEAISGLFSNPVDVTTGQKILLPETDFTLPGRLPVTCSRFYASHLETVGLLGRGWRLNWETSLRDDDEHITLTGVQGRELRYPKTMLTPGHQIFDPEEQLYLSRLHDGRYVLHYTDRSYYVFGDFDSDGMAYLLFMETPHRQRIVFGHEGGRLVRIASSSGHHLLLHRTQTPAGERLSRIELVQG…
A0A3U5C9D4_SALET	RHS repeat protein (Fragment)	DPE98_20880	Salmonella enterica I	1141	MYEAARVDDPIYHTSALAGFLIGAIIGIAIIALAAFAFFSCGFLAGLILGFMADQIASGVLQLGEAIGRSIHHTAGKILTGSENVSTNSRPAARAVLSTVKCDNHIAEKRIAQGSENIYINSQPAARKDDHTECDAVIEDGSPNVFLGGGTQTVLEISSEIPDWLRKVVDVLFVVASLLGGLAGAWRQAAKLGTKFGTKCAAKFIGGELVGMAVGEAISGLFSNPVDVTTGQKILLPETDFTLPGRLPVTCSRFYASHLETVGLLGRGWRLNWETSLRDDDEHITLTGVQGRELRYPKTMLTPGHQIFDPEEQLYLSRLHDGRYVLHYTDRSYYVFGDFDSDGMAYLLFMETPHRQRIVFGHEGGRLVRIASSSGHHLLLHRTQTPAGERLSRIELVQG…
A0A3Z1Q490_SALET	RHS repeat protein (Fragment)	DQC88_21255 DU750_22200	Salmonella enterica I	1147	MYEAARVDDPIYHTSALAGFLIGAIIGIAIIALAAFAFFSCGFLAGLILGFMADQIASGVLQLGEAIGRSIHHTAGKILTGSENVSTNSRPAARAVLSTVKCDNHIAEKRIAQGSENIYINSQPAARKDDHTECDAVIEDGSPNVFLGGGTQTVLEISSEIPDWLRKVVDVLFVVASLLGGLAGAWRQAAKLGTKFGTKCAAKFIGGELVGMAVGEAISGLFSNPVDVTTGQKILLPETDFTLPGRLPVTCSRFYASHLETVGLLGRGWRLNWETSLRDDDEHITLTGVQGRELRYPKTMLTPGHQIFDPEEQLYLSRLHDGRYVLHYTDRSYYVFGDFDSDGMAYLLFMETPHRQRIVFGHEGGRLVRIASSSGHHLLLHRTQTPAGERLSRIELVQG…
A0A3V0VH72_SALET	RHS repeat protein (Fragment)	DRM39_22755	Salmonella enterica I	1152	MYEAARVDDPIYHTSALAGFLIGAIIGIAIIALAAFAFFSCGFLAGLILGFMADQIASGVLQLGEAIGRSIHHTAGKILTGSENVSTNSRPAARAVLSTVKCDNHIAEKRIAQGSENIYINSQPAARKDDHTECDAVIEDGSPNVFLGGGTQTVLEISSEIPDWLRKVVDVLFVVASLLGGLAGAWRQAAKLGTKFGTKCAAKFIGGELVGMAVGEAISGLFSNPVDVTTGQKILLPETDFTLPGRLPVTCSRFYASHLETVGLLGRGWRLNWETSLRDDDEHITLTGVQGRELRYPKTMLTPGHQIFDPEEQLYLSRLHDGRYVLHYTDRSYYVFGDFDSDGMAYLLFMETPHRQRIVFGHEGGRLVRIASSSGHHLLLHRTQTPAGERLSRIELVQG…
S1C496_9ESCH	YD repeat (Two copies) (Fragment)	A1SC_03951	Escherichia sp. KTE52	1014	MYEAARVDDPIYHTSALAGFLIGAIIGIAIIAAASFAFATCGFFAGLVLGFLADQIASGVLQLGEAIGRSIHSTAGKILTGSDNVRTNSRPAARAVLSTVICEDHSPEIRIAQGSGNIYINSQPAARKDDHTECDAVIEDGSPNVFLGGGTQTVLEISPEIPDWLRQVVDVLYVVAGMLGGLAGASRQATKMGSKFGTKCAAKFIGGEIAGMGISEAAMGLFSNPVDVTTGQKILLPETDFTLPGRLPVTCSRFYASHLETEGLLGKGWRLNWEITLRTDEKYITLIGGQGRELSYPKDMLTPGHQIFDPEEQFYLSRLHDGRYVLHYTDRSYYIFDEFDDHGVAPLLFMETPYRQRIAFGRENGRLVRVASSSGHHLLLHRTMTPAGERLSHIELVKG…
A0A3Z4RZS2_SALET	RHS repeat protein (Fragment)	EC434_22360	Salmonella enterica I	1155	MYEAARVDDPIYHTSALAGFLIGAIIGIAIIALAAFAFFSCGFLAGLILGFMADQIASGVLQLGEAIGRSIHHTAGKILTGSENVSTNSRPAARAVLSTVKCDNHIAEKRIAQGSENIYINSQPAARKDDHTECDAVIEDGSPNVFLGGGTQTVLEISSEIPDWLRKVVDVLFVVASLLGGLAGAWRQAAKLGTKFGTKCAAKFIGGELVGMAVGEAISGLFSNPVDVTTGQKILLPETDFTLPGRLPVTCSRFYASHLETVGLLGRGWRLNWETSLRDDDEHITLTGVQGRELRYPKTMLTPGHQIFDPEEQLYLSRLHDGRYVLHYTDRSYYVFGDFDSDGMAYLLFMETPHRQRIVFGHEGGRLVRIASSSGHHLLLHRTQTPAGERLSRIELVQG…
A0A223JN45_9ENTR	Type IV secretion protein Rhs	CI104_05685	Citrobacter farmeri	1369	MYEAARVDDPIYHTSALAGFLIGAIIGIAIIAVAAFAFFTCGFLAGLVLGFLADQIASGVLKLGEAIGRSIHHTAGKILTGSDNVSTNSRPAARAVLSTVICEDHSPEIRIAQGSCNIYINSQPAARKDDHTECDAVIEDGSPNVFLGGGTQTVLEISSEIPDWLRQVVDVLFVVASLLGGLAGAARQAEKLGAKFGVKCAGKFIGGQLVGMGVSEAVMGFFGNPVDVTTGQKILLPETDFTLTGRLPVTCSRFYASHLEAEGLLGRGWRLNWEINLREDEIYITFIGVQGRELSYPKEMLTPGHQIFDPEEQFYLSRLHDGRYVLHYTDRSYYVFDEFDDHGVAPLLFMETPHRQRIAFGRENGRLVRVASSSGHHLLLHRTLTPAGERLSHIELVKG…
A0A3U4AAI1_SALET	RHS repeat protein (Fragment)	DO565_24400	Salmonella enterica I	1164	MYEAARVDDPIYHTSALAGFLIGAIIGIAIIALAAFAFFSCGFLAGLILGFMADQIASGVLQLGEAIGRSIHHTAGKILTGSENVSTNSRPAARAVLSTVKCDNHIAEKRIAQGSENIYINSQPAARKDDHTECDAVIEDGSPNVFLGGGTQTVLEISSEIPDWLRKVVDVLFVVASLLGGLAGAWRQAAKLGTKFGTKCAAKFIGGELVGMAVGEAISGLFSNPVDVTTGQKILLPETDFTLPGRLPVTCSRFYASHLETVGLLGRGWRLNWETSLRDDDEHITLTGVQGRELRYPKTMLTPGHQIFDPEEQLYLSRLHDGRYVLHYTDRSYYVFGDFDSDGMAYLLFMETPHRQRIVFGHEGGRLVRIASSSGHHLLLHRTQTPAGERLSRIELVQG…
A0A504Z783_SALER	RHS repeat protein (Fragment)	FJR52_22475	Salmonella enterica (Salmonella choleraesuis)	1165	MYEAARVDDPIYHTSALAGFLIGAIIGIAIIALAAFAFFSCGFLAGLILGFMADQIASGVLQLGEAIGRSIHHTAGKILTGSENVSTNSRPAARAVLSTVKCDNHIAEKRIAQGSENIYINSQPAARKDDHTECDAVIEDGSPNVFLGGGTQTVLEISSEIPDWLRKVVDVLFVVASLLGGLAGAWRQAAKLGTKFGTKCAAKFIGGELVGMAVGEAISGLFSNPVDVTTGQKILLPETDFTLPGRLPVTCSRFYASHLETVGLLGRGWRLNWETSLRDDDEHITLTGVQGRELRYPKTMLTPGHQIFDPEEQLYLSRLHDGRYVLHYTDRSYYVFGDFDSDGMAYLLFMETPHRQRIVFGHEGGRLVRIASSSGHHLLLHRTQTPAGERLSRIELVQG…
A0A3V9B2L3_SALER	RHS repeat protein (Fragment)	CRQ28_23305	Salmonella enterica (Salmonella choleraesuis)	1169	MYEAARVDDPIYHTSALAGFLIGAIIGIAIIALAAFAFFSCGFLAGLILGFMADQIASGVLQLGEAIGRSIHHTAGKILTGSENVSTNSRPAARAVLSTVKCDNHIAEKRIAQGSENIYINSQPAARKDDHTECDAVIEDGSPNVFLGGGTQTVLEISSEIPDWLRKVVDVLFVVASLLGGLAGAWRQAAKLGTKFGTKCAAKFIGGELVGMAVGEAISGLFSNPVDVTTGQKILLPETDFTLPGRLPVTCSRFYASHLETVGLLGRGWRLNWETSLREDDEHITLTGVQGRELRYPKTMLTPGHQIFDPEEQLYLSRLHDGRYVLHYTDRSYYVFGDFDSDGMAYLLFMETPHRQRIVFGHEGGRLVRIASSSGHHLLLHRTQTPAGERLSRIELVQG…
A0A3Y0JQA7_SALET	RHS repeat protein (Fragment)	D5P36_22695	Salmonella enterica I	1173	MYEAARVDDPIYHTSALAGFLIGAIIGIAIIALAAFAFFSCGFLAGLILGFMADQIASGVLQLGEAIGRSIHHTAGKILTGSENVSTNSRPAARAVLSTVKCDNHIAEKRIAQGSENIYINSQPAARKDDHTECDAVIEDGSPNVFLGGGTQTVLEISSEIPDWLRKVVDVLFVVASLLGGLAGAWRQAAKLGTKFGTKCAAKFIGGELVGMAVGEAISGLFSNPVDVTTGQKILLPETDFTLPGRLPVTCSRFYASHLETVGLLGRGWRLNWETSLRDDDEHITLTGVQGRELRYPKTMLTPGHQIFDPEEQLYLSRLHDGRYVLHYTDRSYYVFGDFDSDGMAYLLFMETPHRQRIVFGHEGGRLVRIASSSGHHLLLHRTQTPAGERLSRIELVQG…
A0A3W8M2Q2_SALER	RHS repeat protein (Fragment)	EG952_21850	Salmonella enterica (Salmonella choleraesuis)	1173	MYEAARVDDPIYHTSALAGFLIGAIIGIAIIALAAFAFFSCGFLAGLILGFMADQIASGVLQLGEAIGRSIHHTAGKILTGSENVSTNSRPAARAVLSTVKCDNHIAEKRIAQGSENIYINSQPAARKDDHTECDAVIEDGSPNVFLGGGTQTVLEISSEIPDWLRKVVDVLFVVASLLGGLAGAWRQAAKLGTKFGTKCAAKFIGGELVGMAVGEAISGLFSNPVDVTTGQKILLPETDFTLPGRLPVTCSRFYASHLETVGLLGRGWRLNWETSLRDDDEHITLTGVQGRELRYPKTMLTPGHQIFDPEEQLYLSRLHDGRYVLHYTDRSYYVFGDFDSDGMAYLLFMETPHRQRIVFGHEGGRLVRIASSSGHHLLLHRTQTPAGERLSRIELVQG…
A0A3W9CE20_SALER	RHS repeat protein (Fragment)	EIR86_22755	Salmonella enterica (Salmonella choleraesuis)	1173	MYEAARVDDPIYHTSALAGFLIGAIIGIAIIALAAFAFFSCGFLAGLILGFMADQIASGVLQLGEAIGRSIHHTAGKILTGSENVSTNSRPAARAVLSTVKCDNHIAEKRIAQGSENIYINSQPAARKDDHTECDAVIEDGSPNVFLGGGTQTVLEISSEIPDWLRKVVDVLFVVASLLGGLAGAWRQAAKLGTKFGTKCAAKFIGGELVGMAVGEAISGLFSNPVDVTTGQKILLPETDFTLPGRLPVTCSRFYASHLETVGLLGRGWRLNWETSLRDDDEHITLTGVQGRELRYPKTMLTPGHQIFDPEEQLYLSRLHDGRYVLHYTDRSYYVFGDFDSDGMAYLLFMETPHRQRIVFGHEGGRLVRIASSSGHHLLLHRTQTPAGERLSRIELVQG…
A0A3Y8KUQ4_SALET	RHS repeat protein (Type IV secretion protein Rhs) (Fragment)	AL864_19275 D4F49_22795 D4G07_23220 D5P22_23020 DLB43_23135 DM705_22905 DMB04_24960 DNI67_20980 DNU67_23200 DSM73_22730 EBO89_22265 EBO94_22100 EC422_23330 EC429_21065 EIW93_24470	Salmonella enterica I	1176	MYEAARVDDPIYHTSALAGFLIGAIIGIAIIALAAFAFFSCGFLAGLILGFMADQIASGVLQLGEAIGRSIHHTAGKILTGSENVSTNSRPAARAVLSTVKCDNHIAEKRIAQGSENIYINSQPAARKDDHTECDAVIEDGSPNVFLGGGTQTVLEISSEIPDWLRKVVDVLFVVASLLGGLAGAWRQAAKLGTKFGTKCAAKFIGGELVGMAVGEAISGLFSNPVDVTTGQKILLPETDFTLPGRLPVTCSRFYASHLETVGLLGRGWRLNWETSLRDDDEHITLTGVQGRELRYPKTMLTPGHQIFDPEEQLYLSRLHDGRYVLHYTDRSYYVFGDFDSDGMAYLLFMETPHRQRIVFGHEGGRLVRIASSSGHHLLLHRTQTPAGERLSRIELVQG…
M7RGF5_SALDU	YD repeat protein (Fragment)	A670_04166	Salmonella enterica subsp. enterica serovar Dublin str. UC16	1176	MYEAARVDDPIYHTSALAGFLIGAIIGIAIIALAAFAFFSCGFLAGLILGFMADQIASGVLQLGEAIGRSIHHTAGKILTGSENVSTNSRPAARAVLSTVKCDNHIAEKRIAQGSENIYINSQPAARKDDHTECDAVIEDGSPNVFLGGGTQTVLEISSEIPDWLRKVVDVLFVVASLLGGLAGAWRQAAKLGTKFGTKCAAKFIGGELVGMAVGEAISGLFSNPVDVTTGQKILLPETDFTLPGRLPVTCSRFYASHLETVGLLGRGWRLNWETSLRDDDEHITLTGVQGRELRYPKTMLTPGHQIFDPEEQLYLSRLHDGRYVLHYTDRSYYVFGDFDSDGMAYLLFMETPHCQRIVFGHEGGRLVRIASSSGHHLLLHRTQTPAGERLSRIELVQG…
A0A3T4D2E9_ECOLX	Type IV secretion protein Rhs (Fragment)	D4023_26030 DLX40_27800	Escherichia coli	1207	MSEGPGGPQGATAGGTLAMRMLSQQAMVASQMKRAANDKAIAQMLASKKSGPPAARLGDEIQHKSFLGALAGAVLGAIVTIAEGCLIMAACATGPYALVLVPALMYASYKASDYVEEKQNQLESWINSFCDTDGAINTGSENVKINGKPAARAAVTLPPPPPPGAIPEVPQGEPSWGDIATDLLESAAEKAVPLAKAWGNAVITLTDSNASFMDRVSAGASLLFPSGPVLMEFATMVGGRGEIKKDVDFPEAGEDTALCDKENKPPRIAQGSSNVFINNQPAARQGDKLECSAAIVEGSPDVFIGGEQVTYLDIQPEFPPWQRMILGGITIASYLLPPAGLLGKLGNLAKLGKLGNLLGKSGKLLGAKLGALLGKTGKSLKSIANKVIRWVTDPVDPVT…
A0A3X9X2P7_SALET	Type IV secretion protein Rhs	D4E09_20085	Salmonella enterica I	1193	MYEAARVDDPIYHTSALAGFLIGAIIGIAIIALAAFAFFSCGFLAGLILGFMADQIASGVLQLGEAIGRSIHHTAGKILTGSENVSTNSRPAARAVLSTVKCDNHIAEKRIAQGSENIYINSQPAARKDDHTECDAVIEDGSPNVFLGGGTQTVLEISSEIPDWLRKVVDVLFVVASLLGGLAGAWRQAAKLGTKFGTKCAAKFIGGELVGMAVGEAISGLFSNPVDVTTGQKILLPETDFTLPGRLPVTCSRFYASHLETVGLLGRGWRLNWETSLRDDDEHITLTGVQGRELRYPKTMLTPGHQIFDPEEQLYLSRLHDGRYVLHYTDRSYYVFGDFDSDGMAYLLFMETPHRQRIVFGHEGGRLVRIASSSGHHLLLHRTQTPAGERLSRIELVQG…
A0A3U4NHA8_SALET	Type IV secretion protein Rhs	DPB61_20330 DSB36_04910	Salmonella enterica I	1198	MYEAARVDDPIYHTSALAGFLIGAIIGIAIIALAAFAFFSCGFLAGLILGFMADQIASGVLQLGEAIGRSIHHTAGKILTGSENVSTNSRPAARAVLSTVKCDNHIAEKRIAQGSENIYINSQPAARKDDHTECDAVIEDGSPNVFLGGGTQTVLEISSEIPDWLRKVVDVLFVVASLLGGLAGAWRQAAKLGTKFGTKCAAKFIGGELVGMAVGEAISGLFSNPVDVTTGQKILLPETDFTLPGRLPVTCSRFYASHLETVGLLGRGWRLNWETSLRDDDEHITLTGVQGRELRYPKTMLTPGHQIFDPEEQLYLSRLHDGRYVLHYTDRSYYVFGDFDSDGMAYLLFMETPHRQRIVFGHEGGRLVRIASSSGHHLLLHRTQTPAGERLSRIELVQG…
A0A3Y8SJS7_SALET	Type IV secretion protein Rhs	D4428_21315 DTW19_20670	Salmonella enterica I	1198	MYEAARVDDPIYHTSALAGFLIGAIIGIAIIALAAFAFFSCGFLAGLILGFMADQIASGVLQLGEAIGRSIHHTAGKILTGSENVSTNSRPAARAVLSTVKCDNHIAEKRIAQGSENIYINSQPAARKDDHTECDAVIEDGSPNVFLGGGTQTVLEISSEIPDWLRKVVDVLFVVASLLGGLAGAWRQAAKLGTKFGTKCAAKFIGGELVGMAVGEAISGLFSNPVDVTTGQKILLPETDFTLPGRLPVTCSRFYASHLETVGLLGRGWRLNWETSLRDDDEHITLTGVQGRELRYPKTMLTPGHQIFDPEEQLYLSRLHDGRYVLHYTDRSYYVFGDFDSDGMAYLLFMETPHRQRIVFGHEGGRLVRIASSSGHHLLLHRTQTPAGERLSRIELVQG…
A0A3V7BHU6_SALER	Type IV secretion protein Rhs	CPF08_11610	Salmonella enterica (Salmonella choleraesuis)	1198	MYEAARVDDPIYHTSALAGFLIGAIIGIAIIALAAFAFFSCGFLAGLILGFMADQIASGVLQLGEAIGRSIHHTAGKILTGSENVSTNSRPAARAVLSTVKCDNHIAEKRIAQGSENIYINSQPAARKDDHTECDAVIEDGSPNVFLGGGTQTVLEISSEIPDWLRKVVDVLFVVASLLGGLAGAWRQAAKLGTKFGTKCAAKFIGGELVGMAVGEAISGLFSNPVDVTTGQKILLPETDFTLPGRLPVTCSRFYASHLETVGLLGRGWRLNWETSLRDDDEHITLTGVQGRELRYPKTMLTPGHQIFDPEEQLYLSRLHDGRYVLHYTDRSYYVFGDFDSDGMAYLLFMETPHRQRIVFGHEGGRLVRIASSSGHHLLLHRTQTPAGERLSRIELVQG…
A0A3Y4TKH3_SALET	Type IV secretion protein Rhs	D5B23_21095 D5O45_23080 D6J55_22205 D6Q63_23075 D8Q64_18290 D8S62_23460 DNV28_20530 DNV93_21160 DP859_22030 DPD61_16905 DPP41_20370 DPT74_21410 DPZ65_21360 DU257_23795 DUB80_22035 DUR69_11965 EBP12_02005 ECA94_20615 ED477_04200 EHB46_21055	Salmonella enterica I	1198	MYEAARVDDPIYHTSALAGFLIGAIIGIAIIALAAFAFFSCGFLAGLILGFMADQIASGVLQLGEAIGRSIHHTAGKILTGSENVSTNSRPAARAVLSTVKCDNHIAEKRIAQGSENIYINSQPAARKDDHTECDAVIEDGSPNVFLGGGTQTVLEISSEIPDWLRKVVDVLFVVASLLGGLAGAWRQAAKLGTKFGTKCAAKFIGGELVGMAVGEAISGLFSNPVDVTTGQKILLPETDFTLPGRLPVTCSRFYASHLETVGLLGRGWRLNWETSLRDDDEHITLTGVQGRELRYPKTMLTPGHQIFDPEEQLYLSRLHDGRYVLHYTDRSYYVFGDFDSDGMAYLLFMETPHRQRIVFGHEGGRLVRIASSSGHHLLLHRTQTPAGERLSRIELVQG…
Q93IR1_SALTM	Rhs1 protein (Type IV secretion protein Rhs)	rhs1 CET98_23905 D4401_23370 D6360_19200	Salmonella typhimurium	1198	MYEAARVDDPIYHTSALAGFLIGAIIGIAIIALAAFAFFSCGFLAGLILGFMADQIASGVLQLGEAIGRSIHHTAGKILTGSENVSTNSRPAARAVLSTVKCDNHIAEKRIAQGSENIYINSQPAARKDDHTECDAVIEDGSPNVFLGGGTQTVLEISSEIPDWLRKVVDVLFVVASLLGGLAGAWRQAAKLGTKFGTKCAAKFIGGELVGMAVGEAISGLFSNPVDVTTGQKILLPETDFTLPGRLPVTCSRFYASHLETVGLLGRGWRLNWETSLRDDDEHITLTGVQGRELRYPKTMLTPGHQIFDPEEQLYLSRLHDGRYVLHYTDRSYYVFGDFDSDGMAYLLFMETPHRQRIVFGHEGGRLVRIASSSGHHLLLHRTQTPAGERLSRIELVQG…
A0A3W9UKB5_SALER	RHS repeat protein	EIR59_18195	Salmonella enterica (Salmonella choleraesuis)	1200	MYEAARVDDPIYHTSALAGFLIGAIIGIAIIALAAFAFFSCGFLAGLILGFMADQIASGVLQLGEAIGRSIHHTAGKILTGSENVSTNSRPAARAVLSTVKCDNHIAEKRIAQGSENIYINSQPAARKDDHTECDAVIEDGSPNVFLGGGTQTVLEISSEIPDWLRKVVDVLFVVASLLGGLAGAWRQAAKLGTKFGTKCAAKFIGGELTGMAVSEAISGLFSNPVDVTTGQKILLPETDFTLPGRLPVTCSRFYASHLETVGLLGRGWRLNWETSLREDDEHITLTGVQGRELRYPKTMLTPGHQIFDPKEQLYLSRLHDGRYVLHYTDRSYYVFGDFDSDGMAYLLFMETPHRQRIVFGHEGGRLVRIASSSGHHLLLHRTQTPAGERLSRIELVQG…
A0A4Q1DNI9_SALER	RHS repeat protein	EKD96_10935	Salmonella enterica (Salmonella choleraesuis)	1200	MYEAARVDDPIYHTSALAGFLIGAIIGIAIIALAAFAFFSCGFLAGLILGFMADQIASGVLQLGEAIGRSIHHTAGKILTGSENVSTNSRPAARAVLSTVKCDNHIAEKRIAQGSENIYINSQPAARKDDHTECDAVIEDGSPNVFLGGGTQTVLEISSEIPDWLRKVVDVLFVVASLLGGLAGAWRQAAKLGTKFGTKCAAKFIGGELTGMAVSEAISGLFSNPVDVTTGQKILLPETDFTLPGRLPVTCSRFYASHLETVGLLGRGWRLNWETSLREDDEHITLTGVQGRELRYPKTMLTPGHQIFDPKEQLYLSRLHDGRYVLHYTDRSYYVFGDFDSDGMAYLLFMETPHRQRIVFGHEGGRLVRIASSSGHHLLLHRTQTPAGERLSRIELVQG…
A0A3A0VGS4_SALER	RHS repeat protein	A7D45_05525	Salmonella enterica (Salmonella choleraesuis)	1200	MYEAARVDDPIYHTSALAGFLIGAIIGIAIIALAAFAFFSCGFLAGLILGFMADQIASGVLQLGEAIGRSIHHTAGKILTGSENVSTNSRPAARAVLSTVKCDNHIAEKRIAQGSENIYINSQPAARKDDHTECDAVIEDGSPNVFLGGGTQTVLEISSEIPDWLRKVVDVLFVVASLLGGLAGAWRQAAKLGTKFGTKCAAKFIGGELTGMAVSEAISGLFSNPVDVTTGQKILLPETDFTLPGRLPVTCSRFYASHLETVGLLGRGWRLNWETSLREDDEHITLTGVQGRELRYPKTMLTPGHQIFDPKEQLYLSRLHDGRYVLHYTDRSYYVFGDFDSDGMAYLLFMETPHRQRIVFGHEGGRLVRIASSSGHHLLLHRTQTPAGERLSRIELVQG…
A0A3U3QL62_SALET	RHS repeat protein (Fragment)	D8S35_23415 DOX30_22870	Salmonella enterica I	1213	MYEAARVDDPIYHTSALAGFLIGAIIGIAIIALAAFAFFSCGFLAGLILGFMADQIASGVLQLGEAIGRSIHHTAGKILTGSENVSTNSRPAARAVLSTVKCDNHIAEKRIAQGSENIYINSQPAARKDDHTECDAVIEDGSPNVFLGGGTQTVLEISSEIPDWLRKVVDVLFVVASLLGGLAGAWRQAAKLGTKFGTKCAAKFIGGELVGMAVGEAISGLFSNPVDVTTGQKILLPETDFTLPGRLPVTCSRFYASHLETVGLLGRGWRLNWETSLRDDDEHITLTGVQGRELRYPKTMLTPGHQIFDPEEQLYLSRLHDGRYVLHYTDRSYYVFGDFDSDGMAYLLFMETPHRQRIVFGHEGGRLVRIASSSGHHLLLHRTQTPAGERLSRIELVQG…
A0A4T6J3V0_ECOLX	Type IV secretion protein Rhs	C9114_23505	Escherichia coli	1613	MSEGPGGPQGATAGGTLAMRMLSQQAMVASQMKRAANDKAIAQMLASKKSGPPAARLGDEIQHKSFLGALAGAVLGAIVTIAEGCLIMAACATGPYALVLVPALMYASYKASDYVEEKQNQLESWINSFCDTDGAINTGSENVKINGKPAARAAVTLPPPPPPGAIPEVPQGEPSWGDIATDLLESAAEKAVPLAKAWGNAVITLTDSNAGFMDRVSAGASLLFPAGPVLMEFATMVGGRGEIKKDVDFPEAGEDTALCDKENKPPRIAQGSSNVFINNQPAARQGDKLECSAAIVGGSPDVFIGGEQVTYLDIQPEFPPWQRMILGGITIASYLLPPAGLLGKLKNLARLGKLGNLLGKSGKLLGAKLGALLGKTGKSLKSIANKVIRWVTDPVDPVT…
A0A400BYE2_ECOLX	Type IV secretion protein Rhs	BvCmsSIP044_03744 D6W00_13055 D7V65_25085	Escherichia coli	1613	MSEGPGGPQGATAGGTLAMRMLSQQAMVASQMKRAANDKAIAQMLASKKSGPPAARLGDEIQHKSFLGALAGAVLGAIVTIAEGCLIMAACATGPYALVLVPALMYASYKASDYVEEKQNQLESWINSFCDTDGAINTGSENVKINGKPAARAAVTLPPPPPPGAIPEVPQGEPSWGDIATDLLESAAEKAVPLAKAWGNAVITLTDSNAGFMDRVSAGASLLFPAGPVLMEFATMVGGRGEIKKDVDFPEAGEDTALCDKENKPPRIAQGSSNVFINNQPAARQGDKLECSAAIVGGSPDVFIGGEQVTYLDIQPEFPPWQRMILGGITIASYLLPPAGLLGKLKNLARLGKLGNLLGKSGKLLGAKLGALLGKTGKSLKSIANKVIRWVTDPVDPVT…
A0A3Z8X9T5_ECOLX	Type IV secretion protein Rhs	D9G13_23680	Escherichia coli	1613	MSEGPGGPQGATAGGTLAMRMLSQQAMVASQMKRAANDKAIAQMLASKKSGPPAARLGDEIQHKSFLGALAGAVLGAIVTIAEGCLIMAACATGPYALVLVPALMYASYKASDYVEEKQNQLESWINSFCDTDGAINTGSENVKINGKPAARAAVTLPPPPPPGAIPEVPQGEPSWGDIATDLLESAAEKAVPLAKAWGNAVITLTDSNAGFMDRVSAGASLLFPAGPVLMEFATMVGGRGEIKKDVDFPEAGEDTALCDKENKPPRIAQGSSNVFINNQPAARQGDKLECSAAIVGGSPDVFIGGEQVTYLDIQPEFPPWQRMILGGITIASYLLPPAGLLGKLKNLARLGKLGNLLGKSGKLLGAKLGALLGRTKNALKNTYNVLKKFIKDPVDPVT…
A0A3Z9CHV0_ECOLX	Type IV secretion protein Rhs	D9J63_04205	Escherichia coli	1610	MSEGPGGPQGATAGGTLAMRMLSQQAMVASQMKRAANDKAIAQMLASKKSGPPAARLGDEIQHKSFLGALAGAVLGAIVTIAEGCLIMAACATGPYALVLVPALMYASYKASDYVEEKQNQLESWINSFCDTDGAINTGSENVKINGKPAARAAVTLPPPPPPGAIPEVPQGEPSWGDIATDLLESAAEKAVPLAKAWGNAVITLTDSNAGFMDRVSAGASLLFPAGPVLMEFATMVGGRGEIKKDVDFPEAGEDTALCDKENKPPRIAQGSSNVFINNQPAARQGDKLECSAAIVGGSPDVFIGGEQVTYLDIQPEFPPWQRMILGGITIASYLLPPAGLLGKLKNLARLGKLGNLLGKSGKLLGAKLGALLGKTGKSLKSIANKVIRWVTDPVDPVT…
D8EE98_ECOLX	RHS repeat-associated core domain protein	HMPREF9346_04869	Escherichia coli MS 119-7	1610	MSEGPGGPQGATAGGTLAMRMLSQQAMVASQMKRAANDKAIAQMLASKKSGPPAARLGDEIQHKSFLGALAGAVLGAIVTIAEGCLIMAACATGPYALVLVPALMYASYKASDYVEEKQNQLESWINSFCDTDGAINTGSENVKINGKPAARAAVTLPPPPPPGAIPEVPQGEPSWGDIATDLLESAAEKAVPLAKAWGNAVITLTDSNAGFMDRVSAGASLLFPAGPVLMEFATMVGGRGEIKKDVDFPEAGEDTALCDKENKPPRIAQGSSNVFINNQPAARQGDKLECSAAIVGGSPDVFIGGEQVTYLDIQPEFPPWQRMILGGITIASYLLPPAGLLGKLKNLARLGKLGNLLGKSGKLLGAKLGALLGKTGKSLKSIANKVIRWVTDPVDPVT…
A0A0L1CCN2_ECOLX	Type IV secretion protein Rhs	WQ89_00665	Escherichia coli	1620	MSEGPGGPQGATAGGTLAMRMLSQQAMVASQMKRAANDKAIAQMLASKKSGPPAARLGDEIQHKSFLGALAGAVLGAIVTIAEGCLIMAACATGPYALVLVPALMYASYKASDYVEEKQNQLESWINSFCDTDGAINTGSENVKINGKPAARAAVTLPPPPPPGAIPEVPQGEPSWGDIATDLLESAAEKAVPLAKAWGNAVITLTDSNAGFMDRVSAGASLLFPAGPVLMEFATMVGGRGEIKKDVDFPEAGEDTALCDKENKPPRIAQGSSNVFINNQPAARQGDKLECSAAIVGGSPDVFIGGEQVTYLDIQPEFPPWQRMILGGITIASYLLPPAGLLGKLKNLARLGKLGNLLGKSGKLLGAKLGALLGKTGKSLKSIANKVIRWVTDPVVPVT…
A0A3D8XBF3_9ENTR	Type IV secretion protein Rhs	DBP23_24790	Enterobacter sp. EC-NT1	1620	MSEGPGGPQGATAGGTLAMRMLSQQAMVASQMKRAANDKAIAQMLASKKSGPPAARLGDEIQHKSFLGALAGAVLGAIVTIAEGCLIMAACATGPYALVLVPALMYASYKASDYVEEKQNQLESWINSFCDTDGAINTGSENVKINGKPAARAAVTLPPPPPPGAIPEVPQGEPSWGDIATDLLESAAEKAVPLAKAWGNAVITLTDSNAGFMDRVSAGASLLFPAGPVLMEFATMVGGRGEIKKDVDFPEAGEDTALCDKENKPPRIAQGSSNVFINNQPAARQGDKLECSAAIVGGSPDVFIGGEQVTYLDIQPEFPPWQRMILGGITIASYLLPPAGLLGKLKNLARLGKLGNLLGKSGKLLGAKLGALLGKTGKSLKSIANKVIRWVTDPVDPVT…
A0A376RN12_ECOLX	Rhs core protein with extension	wapA_7 NCTC10865_04578	Escherichia coli	1620	MSEGPGGPQGATAGGTLAMRMLSQQAMVASQMKRAANDKAIAQMLASKKSGPPAARLGDEIQHKSFLGALAGAVLGAIVTIAEGCLIMAACATGPYALVLVPALMYASYKASDYVEEKQNQLESWINSFCDTDGAINTGSENVKINGKPAARAAVTLPPPPPPGAIPEVPQGEPSWGDIATDLLESAAEKAVPLAKAWGNAVITLTDSNAGFMDRVSAGASLLFPAGPVLMEFATMVGGRGEIKKDVDFPEAGEDTALCDKENKPPRIAQGSSNVFINNQPAARQGDKLECSAAIVGGSPDVFIGGEQVTYLDIQPEFPPWQRMILGGITIASYLLPPAGLLGKLKNLARLGKLGNLLGKSGKLLGAKLGALLGKTGKSLKSIANKVIRWVTDPVDPVT…
A0A3Z9A0U3_ECOLX	Type IV secretion protein Rhs	D9D52_00530	Escherichia coli	1620	MSEGPGGPQGATAGGTLAMRMLSQQAMVASQMKRAANDKAIAQMLASKKSGPPAARLGDEIQHKSFLGALAGAVLGAIVTIAEGCLIMAACATGPYALVLVPALMYASYKASDYVEEKQNQLESWINSFCDTDGAINTGSENVKINGKPAARAAVTLPPPPPPGAIPEVPQGEPSWGDIATDLLESAAEKAVPLAKAWGNAVITLTDSNAGFMDRVSAGASLLFPAGPVLMEFATMVGGRGEIKKDVDFPEAGEDTALCDKENKPPRIAQGSSNVFINNQPAARQGDKLECSAAIVGGSPDVFIGGEQVTYLDIQPEFPPWQRMILGGITIASYLLPPAGLLGKLKNLARLGKLGNLLGKSGKLLGAKLGALLGKTGKSLKSIANKVIRWVTDPVDPVT…
A0A3Z8Z747_ECOLX	Type IV secretion protein Rhs	EHC25_21065	Escherichia coli	1599	MSEGPGGPQGATAGGTLAMRMLSQQAMVASQMKRAANDKAIAQMLASKKSGPPAARLGDEIQHKSFLGALAGAVLGAIVTIAEGCLIMAACATGPYALVLVPALMYASYKASDYVEEKQNQLESWINSFCDTDGAINTGSENVNINGKPAARAAVTLPPPPPPGAIPEVPQGEPSWGDIATDLLESAAEKAVPLAKAWGNAVITLTDSNAGFMDRVSAGASLLFPAGPVLMEFATMVGGRGEIKKDVDFPEAGEDTALCDKENKPPRIAQGSSNVFINNQPAARQGDKLECSAAIVGGSPDVFIGGEQVTYLDIQPEFPPWQRMILGGITIASYLLPPAGLLGKLKNLARLGKLGNLLGKSGKLLGAKLGALLGKTGKSLKSIANKVIRWVTDPVDPVT…
A0A4D2R1K4_ECOLX	Type IV secretion protein Rhs	BvCmsOUP014_00513	Escherichia coli	1610	MSEGPGGPQGATAGGTLAMRMLSQQAMVASQMKRAANDKAIAQMLAAKKSGPPAARLGDEIQHKSFLGALAGAVLGAIVTIAEGCLIMAACATGPYALVLVPALMYASYKASDYVEEKQNQLESWINSFCDTDGAINTGSENVKINGKPAARAAVTLPPPPPPGAIPEVPQGEPSWGDIATDLLESAAEKAVPLAKAWGNAVITLTDSNAGFMDRVSAGASLLFPAGPVLMEFATMVGGRGEIKKDVDFPEAGEDTALCDKENKPPRIAQGSSNVFINNQPAARQGDKLECSAAIVGGSPDVFIGGEQVTYLDIQPEFPPWQRMILGGITIASYLLPPAGLLGKLKNLARLGKLGNLLGKSGKLLGAKLGALLGKTGKSLKSIANKVIRWVTDPVDPVT…
A0A3Z8FDI8_ECOLX	Type IV secretion protein Rhs	D7W93_26205 EIZ23_23355	Escherichia coli	1620	MSEGPGGPQGATAGGTLAMRMLSQQAMVASQMKRAANDKAIAQMLASKKSGPPAARLGDEIQHKSFLGALAGAVLGAIVTIAEGCLIMAACATGPYALVLVPALMYASYKASDYVEEKQNQLESWINSFCDTDGAINTGSENVKINGKPAARAAVTLPPPPPPGAIPEVPQGEPSWGDIATDLLESAAEKAVPLAKAWGNAVITLTDSNAGFMDRVSAGASLLFPAGPVLMEFATMVGGRGEIKKDVDFPEAGEDTALCDKENKPPRIAQGSSNVFINNQPAARQGDKLECSAAIVGGSPDVFIGGEQVTYLDIQPEFPPWQRMILGGITIASYLLPPAGLLGKLKNLARLGKLGNLLGKSGKLLGAKLGALLGKTGKSLKSIANKVIRWVTDPVDPVT…
A0A3T6EQU7_SALET	Type IV secretion protein Rhs	DL111_14105	Salmonella enterica I	1287	MYEAARVDDPIYHTSALAGFLIGAIIGIAIIALAAFAFFSCGFLAGLILGFMADQIASGVLQLGEAIGRSIHHTAGKILTGSENVSTNSRPAARAVLSTVKCDNHIAEKRIAQGSENIYINSQPAARKDDHTECDAVIEDGSPNVFLGGGTQTVLEISSEIPDWLRKVVDVLFVVASLLGGLAGAWRQAAKLGTKFGTKCAAKFIGGELVGMAVGEAISGLFSNPVDVTTGQKILLPETDFTLPGRLPVTCSRFYASHLETVGLLGRGWRLNWETSLREDDEYITLTGVQGRELRYPKTMLTPGHQIFDPEEQLYLSRLHDGRYVLHYTDRSYYVFGDFDSDGMAYLLFMETPHRQRIVFGHEGGRLVRIASSSGHHLLLHRTQTPAGERLSRIELVQG…
A0A455I633_ECOLX	Type IV secretion protein Rhs	BON71_01810	Escherichia coli	1620	MSEGPGGPQGATAGGTLAMRMLSQQAMVASQMKRAANDKAIAQMLASKKSGPPAARLGDEIQHKSFLGALAGAVLGAIVTIAEGCLIMAACATGPYALVLVPALMYASYKASDYVEEKQNQLESWINSFCDTDGAINTGSENVKINGKPAARAAVTLPPPPPPGAIPEVPQGEPSWGDIATDLLESAAEKAVPLAKAWGNAVITLTDSNAGFMDRVSAGASLLFPAGPVLMEFATMVGGRGEIKKDVDFPEAGEDTALCDKENKPPRIAQGSSNVFINNQPAARQGDKLECSAAIVGGSPDVFIGGEQVTYLDIQPEFPPWQRMILGGITIASYLLPPAGLLGKLKNLARLGKLGNLLGKSGKLLGAKLGALLGKTGKSLKSIANKVIRWVTDPVDPVT…
A0A0Q3H388_ECOLX	Type IV secretion protein Rhs	AM270_26125	Escherichia coli	1620	MSEGPGGPQGATAGGTLAMRMLSQQAMVASQMKRAANDKAIAQMLASKKSGPPAARLGDEIQHKSFLGALAGAVLGAIVTIAEGCLIMAACATGPYALVLVPALMYASYKASDYVEEKQNQLESWINSFCDTDGAINTGSENVKINGKPAARAAVTLPPPPPPGAIPEVPQGEPSWGDIATDLLESAAEKAVPLAKAWGNAVITLTDSNAGFMDRVSAGASLLFPAGPVLMEFATMVGGRGEIKKDVDFPEAGEDTALCDKENKPPRIAQGSSNVFINNQPAARQGDKLECSAAIVGGSPDVFIGGEQVTYLDIQPEFPPWQRMILGGITIASYLLPPAGLLGKLKNLARLGKLGNLLGKSGKLLGAKLGALLGKTGKSLKSIANKVIRWVTDPVDPVT…
A0A3Z9V5X3_ECOLX	Type IV secretion protein Rhs	D6184_23205	Escherichia coli	1620	MSEGPGGPQGATAGGTLAMRMLSQQAMVASQMKRAANDKAIAQMLASKKSGPPAARLGDEIQHKSFLGALAGAVLGAIVTIAEGCLIMAACATGPYALVLVPALMYASYKASDYVEEKQNQLESWINSFCDTDGAINTGSENVKINGKPAARAAVTLPPPPPPGAIPEVPQGEPSWGDIATDLLESAAEKAVPLAKAWGNAVITLTDSNAGFMDRVSAGASLLFPAGPVLMEFATMVGGRGEIKKDVDFPEAGEDTALCDKENKPPRIAQGSSNVFINNQPAARQGDKLECSAAIVGGSPDVFIGGEQVTYLDIQPEFPPWQRMILGGITIASYLLPPAGLLGKLKNLARLGKLGNLLGKSGKLLGAKLGALLGKTGKSLKSIANKVIRWVTDPVDPVT…
E9TNG2_ECOLX	RHS repeat-associated core domain protein	HMPREF9542_05403	Escherichia coli MS 117-3	1620	MSEGPGGPQGATAGGTLAMRMLSQQAMVASQMKRAANDKAIAQMLASKKSGPPAARLGDEIQHKSFLGALAGAVLGAIVTIAEGCLIMAACATGPYALVLVPALMYASYKASDYVEEKQNQLESWINSFCDTDGAINTGSENVKINGKPAARAAVTLPPPPPPGAIPEVPQGEPSWGDIATDLLESAAEKAVPLAKAWGNAVITLTDSNAGFMDRVSAGASLLFPAGPVLMEFATMVGGRGEIKKDVDFPEAGEDTALCDKENKPPRIAQGSSNVFINNQPAARQGDKLECSAAIVGGSPDVFIGGEQVTYLDIQPEFPPWQRMILGGITIASYLLPPAGLLGKLKNLARLGKLGNLLGKSGKLLGAKLGALLGKTGKSLKSIANKVIRWVTDPVDPVT…
A0A4Q8IRJ0_ECOLX	Type IV secretion protein Rhs	EXX24_02615 F1E13_25720	Escherichia coli	1620	MSEGPGGPQGATAGGTLAMRMLSQQAMVASQMKRAANDKAIAQMLASKKSGPPAARLGDEIQHKSFLGALAGAVLGAIVTIAEGCLIMAACATGPYALVLVPALMYASYKASDYVEEKQNQLESWINSFCDTDGAINTGSENVNINGKPAARAAVTLPPPPPPGAIPEVPQGEPSWGDIATDLLESAAEKAVPLAKAWGNAVITLTDSNAGFMDRVSAGASLLFPAGPVLMEFATMVGGRGEIKKDVDFPEAGEDTALCDKENKPPRIAQGSSNVFINNQPAARQGDKLECSAAIVGGSPDVFIGGEQVTYLDIQPEFPPWQRMILGGITIASYLLPPAGLLGKLKNLARLGKLGNLLGKSGKLLGAKLGALLGKTGKSLKSIANKVIRWVTDPVDPVT…
A0A1L4IRS3_ECOLX	Type IV secretion protein Rhs	RG28_01725	Escherichia coli	1599	MSEGPGGPQGATAGGTLAMRMLSQQAMVASQMKRAANDKAIAQMLASKKSGPPAARLGDEIQHKSFLGALAGAVLGAIVTIAEGCLIMAACATGPYALVLVPALMYASYKASDYVEEKQNQLESWINSFCDTDGAINTGSENVNINGKPAARAAVTLPPPPPPGAIPEVPQGEPSWGDIATDLLESAAEKAVPLAKAWGNAVITLTDSNAGFMDRVSAGASLLFPAGPVLMEFATMVGGRGEIKKDVDFPEAGEDTALCDKENKPPRIAQGSSNVFINNQPAARQGDKLECSAAIVGGSPDVFIGGEQVTYLDIQPEFPPWQRMILGGITIASYLLPPAGLLGKLKNLARLGKLGNLLGKSGKLLGAKLGALLGKTGKSLKSIANKVIRWVTDPVDPVT…
A0A2I6I517_ECOLX	Type IV secretion protein Rhs	BVL39_00050 BVL39_25795 D9K48_15915	Escherichia coli	1620	MSEGPGGPQGATAGGTLAMRMLSQQAMVASQMKRAANDKAIAQMLASKKSGPPAARLGDEIQHKSFLGALAGAVLGAIVTIAEGCLIMAACATGPYALVLVPALMYASYKASDYVEEKQNQLESWINSFCDTDGAINTGSENVKINGKPAARAAVTLPPPPPPGAIPEVPQGEPSWGDIATDLLESAAEKAVPLAKAWGNAVITLTDSNAGFMDRVSAGASLLFPAGPVLMEFATMVGGRGEIKKDVDFPEAGEDTALCDKENKPPRIAQGSSNVFINNQPAARQGDKLECSAAIVGGSPDVFIGGEQVTYLDIQPEFPPWQRMILGGITIASYLLPPAGLLGKLKNLARLGKLGNLLGKSGKLLGAKLGALLGKTGKSLKSIANKVIRWVTDPVDPVT…
A0A2S1Y8R2_ECOLX	Type IV secretion protein Rhs	C7235_18065	Escherichia coli	1620	MSEGPGGPQGATAGGTLAMRMLSQQAMVASQMKRAANDKAIAQMLASKKSGPPAARLGDEIQHKSFLGALAGAVLGAIVTIAEGCLIMAACATGPYALVLVPALMYASYKASDYVEEKQNQLESWINSFCDTDGAINTGSENVKINGKPAARAAVTLPPPPPPGAIPEVPQGEPSWGDIATDLLESAAEKAVPLAKAWGNAVITLTDSNAGFMDRVSAGASLLFPAGPVLMEFATMVGGRGEIKKDVDFPEASEDTALCDKENKPPRIAQGSSNVFINNQPAARQGDKLECSAAIVGGSPDVFIGGEQVTYLDIQPEFPPWQRMILGGITIASYLLPPAGLLGKLKNLARLGKLGNLLGKSGKLLGAKLGALLGKTGKSLKSIANKVIRWVTDPVDPVT…
A0A0H3ETC9_ECOLW	Putative rhs C-terminal tip	ECW_m0619	Escherichia coli (strain ATCC 9637 / CCM 2024 / DSM 1116 / NCIMB 8666 / NRRL B-766 / W)	1606	MSEGPGGPQGATAGGTLAMRMLSQQAMVASQMKRAANDKAIAQMLAAKKSGPPAARLGDEIQHKSFLGALAGAVLGAIVTIAEGCLIMAACATGPYALVLVPALMYASYKASDYVEEKQNQLESWINSFCDTDGAINTGSENVKINGKPAARAAVTLPPPPPPGAIPEVPQGEPSWGDIATDLLESAAEKAVPLAKAWGNAVITLTDSNAGFMDRVSAGASLLFPAGPVLMEFATMVGGRGEIKKDVDFPEAGEDTALCDKENKPPRIAQGSSNVFINNQPAARQGDKLECSAAIVGGSPDVFIGGEQVTYLDIQPEFPPWQRMILGGITIASYLLPPAGLLGKLKNLARLGKLGNLLGKSGKLLGAKLGALLGKTGKSLKSIANKVIRWVTDPVDPVT…
A0A4T7IJJ7_ECOLX	Type IV secretion protein Rhs	DEN97_07265	Escherichia coli	1620	MSEGPGGPQGATAGGTLAMRMLSQQAMVASQMKRAANDKAIAQMLASKKSGPPAARLGDEIQHKSFLGALAGAVLGAIVTIAEGCLIMAACATGPYALVLVPALMYASYKASDYVEEKQNQLESWINSFCDTDGAINTGSENVNINGKPAARAAVTLPPPPPPGAIPEVPQGEPSWGDIATDLLESAAEKAVPLAKAWGNAVITLTDSNAGFMDRVSAGASLLFPAGPVLMEFATMVGGRGEIKKDVDFPEAGEDTALCDKENKPPRIAQGSSNVFINNQPAARQGDKLECSAAIVGGSPDVFIGGEQVTYLDIQPEFPPWQRMILGGITIASYLLPPAGLLGKLKNLARLGKLGNLLGKSGKLLGAKLGALLGKTGKSLKSIANKVIRWVTDPVDPVT…
A0A2H2UKJ6_ECOLX	Uncharacterized protein	C9Z37_11965 HW43_06540	Escherichia coli	767	MSEGPGGPQGATAGGTLAMRMLSQQAMVASQMKRAANDKAIAQMLAAKKSGPPAARLGDEIQHKSFLGALAGAVLGAIVTIAEGCLIMAACATGPYALVLVPALMYASYKASDYVEEKQNQLESWINSFCDTDGAINTGSENVNINGKPAARAAVTLPPPPPPGAIPEVPQGEPSWGDIATDLLESAAEKAVPLAKAWGNAVITLTDSNAGFMDRLCAGTSLLFPAGPVLMEFATMVGGRGEIKKDVDFPEAGEDTALCDKENKPPRIAQGSSNVFINNQPAARKGDKLECSAAIVEGSPDVFIGGEQVTYLDIQPEFPPWQRMILGGITIASYLLPPAGLLGKLGNLAKLGKLGNLLGKSGNRGFACEQGWNAAGQPVSQRAGFFPEEATWSGLVPSL…
A0A403LUE5_ECOLX	Type IV secretion protein Rhs (Fragment)	DP258_25710	Escherichia coli	1259	MSEGPGGPQGATAGGTLAMRMLSQQAMVASQMKRAANDKAIAQMLASKKSGPPAARLGDEIQHKSFLGALAGAVLGAIVTIAEGCLIMAACATGPYALVLVPALMYASYKASDYVEEKQNQLESWINSFCDTDGAINTGSENVKINGKPAARAAVTLPPPPPPGAIPEVPQGEPSWGDIATDLLESAAEKAVPLAKAWGNAVITLTDSNASFMDRVSAGASLLFPSGPVLMEFATMVGGRGEIKKDVDFPEAGEDTALCDKENKPPRIAQGSSNVFINNQPAARQGDKLECSAAIVEGSPDVFIGGEQVTYLDIQPEFPPWQRMILGGITIASYLLPPAGLLGKLGNLAKLGKLGNLLGKSGKLLGAKLGALLGKTGKSLKSIANKVIRWVTDPVDPVT…
A0A1Q6AVF8_ECOLX	Type IV secretion protein Rhs	ACN81_14400	Escherichia coli	1620	MSEGPGGPQGATAGGTLAMRMLSQQAMVASQMKRAANDKAIAQMLASKKSGPPAARLGDEIQHKSFLGALAGAVLGAIVTIAEGCLIMAACATGPYALVLVPALMYASYKASDYVEEKQNQLESWINSFCDTDGAINTGSENVNINGKPAARAAVTLPPPPPPGAIPEVPQGEPSWGDIATDLLESAAEKAVPLAKAWGNAVITLTDSNAGFMDRVSAGASLLFPAGPVLMEFATMVGGRGEIKKDVDFPEAGEDTALCDKENKPPRIAQGSSNVFINNQPAARQGDKLECSAAIVGGSPDVFIGGEQVTYLDIQPEFPPWQRMILGGITIASYLLPPAGLLGKLKNLARLGKLGNLLGKSGKLLGAKLGALLGKTGKSLKSIANKVIRWVTDPVDPVT…
A0A3X2YT17_SALER	RHS repeat protein (Fragment)	EHZ42_22270	Salmonella enterica (Salmonella choleraesuis)	1315	MYEAARVDDPIYHTSALAGFLIGAIIGIAIIALAAFAFFSCGFLAGLILGFMADQIASGVLQLGEAIGRSIHHTAGKILTGSENVSTNSRPAARAVLSTVKCDNHIAEKRIAQGSENIYINSQPAARKDDHTECDAVIEDGSPNVFLGGGTQTVLEISSEIPDWLRKVVDVLFVVASLLGGLAGAWRQAAKLGTKFGTKCAAKFIGGELVGMAVGEAISGLFSNPVDVTTGQKILLPETDFTLPGRLPVTCSRFYASHLETVGLLGRGWRLNWETSLREDDEHITLTGVQGRELRYPKTMLTPGHQIFDPKEQLYLSRLHDGRYVLHYTDRSYYVFGDFDSDGMAYLLFMETPHRQRIVFGHEGGRLVRIASSSGHHLLLHRTQTPAGERLSRIELVQG…
A0A4Y8DWN0_ECOLX	Type IV secretion protein Rhs	BON63_03660	Escherichia coli	1617	MSEGPGGPQGATAGGTLAMRMLSQQAMVASQMKRAANDKAIAQMLASKKSGPPAARLGDEIQHKSFLGALAGAVLGAIVTIAEGCLIMAACATGPYALVLVPALMYASYKASDYVEEKQNQLESWINSFCDTDGAINTGSENVNINGKPAARAAVTLPPPPPPGAIPEVPQGEPSWGDIATDLLESAAEKAVPLAKAWGNAVITLTDSNAGFMDRVSAGASLLFPAGPVLMEFATMVGGRGEIKKDVDFPEAGEDTALCDKENKPPRIAQGSSNVFINNQPAARQGDKLECSAAIVGGSPDVFIGGEQVTYLDIQPEFPPWQRMILGGITIASYLLPPAGLLGKLKNLARLGKLGNLLGKSGKLLGAKLGALLGKTGKSLKSIANKVIRWVTDPVDPVT…
A0A3X6H9R3_SALER	RHS repeat protein (Fragment)	EF963_20910	Salmonella enterica (Salmonella choleraesuis)	1323	MYEAARVDDPIYHTSALAGFLIGAIIGIAIIALAAFAFFSCGFLAGLILGFMADQIASGVLQLGEAIGRSIHHTAGKILTGSENVSTNSRPAARAVLSTVKCDNHIAEKRIAQGSGNIYINSQPAARKDDHTECDAVVEDGSPNVFLGGGTQTVLEISSEIPDWLRKVVDVLFVVASLLGGLAGAWRQAAKLGTKFGTKCAAKFIGGELTGMAVSEAISGLFSNPVDVTTGQKILLPETDFTLPGRLPVTCSRFYASHLETVGLLGQGWRLNWETSLREDDEHITLTGVQGRELRYPKMMLTPGHQIFGPKEQLYLSRLHDGRYVLHYTDRSYYVFGDFDSDGMAYLLFMETPHRQRIVFGHEGGRLVRIASSSGHHLLLHRTQTPAGERLSRIELVQG…
A0A2T3STU2_ECOLX	Type IV secretion protein Rhs	C7B02_28435	Escherichia coli	1617	MSEGPGGPQGATAGGTLAMRMLSQQAMVASQMKRAANDKAIAQMLASKKSGPPAARLGDEIQHKSFLGALAGAVLGAIVTIAEGCLIMAACATGPYALVLVPALMYASYKASDYVEEKQNQLESWINSFCDTDGAINTGSENVNINGKPAARAAVTLPPPPPPGAIPEVPQGEPSWGDIATDLLESAAEKAVPLAKAWGNAVITLTDSNAGFMDRVSAGASLLFPAGPVLMEFATMVGGRGEIKKDVDFPEAGEDTALCDKENKPPRIAQGSSNVFINNQPAARQGDKLECSAAIVGGSPDVFIGGEQVTYLDIQPEFPPWQRMIQGGITIASYLLPPAGLLGKLKNLARLGKLGNLLGKSGKLLGAKLGALLGKTGKSLKSIANKVIRWVTDPVDPVT…
A0A3U6CPS7_ECOLX	Type IV secretion protein Rhs	DQF47_24405	Escherichia coli	1617	MSEGPGGPQGATAGGTLAMRMLSQQAMVASQMKRAANDKAIAQMLASKKSGPPAARLGDEIQHKSFLGALAGAVLGAIVTIAEGCLIMAACATGPYALVLVPALMYASYKASDYVEEKQNQLESWINSFCDTDGAINTGSENVNINGKPAARAAVTLPPPPPPGAIPEVPQGEPSWGDIATDLLESAAEKAVPLAKAWGNAVITLTDSNAGFMDRVSAGASLLFPAGPVLMEFATMVGGRGEIKKDVDFPEAGEDTALCDKENKPPRIAQGSSNVFINNQPAARQGDKLECSAAIVGGSPDVFIGGEQVTYLDIQPEFPPWQRMILGGITIASYLLPPAGLLGKLKNLVRLGKLGNLLGKSGKLLGAKLGALLGKTGKSLKSIANKVIRWVTDPVDPVT…
B6I1I8_ECOSE	Rhs core protein	ECSE_0631	Escherichia coli (strain SE11)	1619	MSEGPGGPQGATAGGTLAMRMLSQQAMVASQMKRAANDKAIAQMLASKKSGPPAARLGDEIQHKSFLGALAGAVLGAIVTIAEGCLIMAACATGPYALVLVPALMYASYKASDYVEEKQNQLESWINSFCDTDGAINTGSENVKINGKPAARAAVTLPPPPPPGAIPEVPQGEPSWGDIATDLLESAAEKAVPLAKAWGNAVITLTDSNAGFMDRVSAGASLLFPAGPVLMEFATMVGGRGEIKKDVDFPEAGEDTALCDKENKPPRIAQGSSNVFINNQPAARQGDKLECSAAIVGGSPDVFIGGEQVTYLDIQPEFPPWQRMILGGITIASYLLPPAGLLGKLKNLARLGKLGNLLGKSGKLLGAKLGALLGKTGKSLKSIANKVIRWVTDPVDPVT…
A0A3V4T4S7_SALER	RHS repeat protein (Fragment)	DLG46_21765	Salmonella enterica (Salmonella choleraesuis)	1326	MYEAARVDDPIYHTSALAGFLIGAIIGIAIIALAAFAFFSCGFLAGLILGFMADQIASRVLQLGEAIGRSIHHTAGKILTGSENVSTNSRPAARAVLSTVKCDNHIAEKRIAQGSENIYINSQPAARKDDHTECDAVIEDGSPNVFLGGGTQTVLEISSEIPDWLRKVVDVLFVVASLLGGLAGAWRQAAKLGTKFGTKCAAKFIGGELTGMAVSEAISGLFSNPVDVTTGQKILLPETDFTLPGRLPVTCSRFYASHLETVGLLGRGWRLNWETSLRDDDEHITLTGVQGRELRYPKTMLTPGHQIFDPEEQLYLSRLHDGRYVLHYTDRSYYVFGDFDSDGMAYLLFMETPHRQRIVFGHEGGRLVRIASSSGHHLLLHRTQTPAGERLSRIELVQG…
A0A3W7G1U1_SALER	RHS repeat protein (Fragment)	EG904_22570	Salmonella enterica (Salmonella choleraesuis)	1334	MYEAARVDDPIYHTSALAGFLIGAIIGIAIIALAAFAFFSCGFLAGLILGFMADQIASGVLQLGEAIGRSIHHTAGKILTGSENVSTNSRPAARAVLSTVKCDNHIAEKRIAQGSENIYINSQPAARKDDHTECDAVIEDGSPNVFLGGGTQTVLEISSEIPDWLRKVVDVLFVVASLLGGLAGAWRQAAKLGTKFGTKCAAKFIGGELVGMAVGEAISGLFSNPVDVTTGQKILLPETDFTLPGRLPVTCSRFYASHLETVGLLGRGWRLNWETSLREDDEHITLTGVQGRELRYPKTMLTPGHQIFDPEEQLYLSRLHDGRYVLHYTDRSYYVFGDFDSDGMAYLLFMETPHRQRIVFGHEGGRLVRIASSSGHHLLLHRTQTPAGERLSRVELVQG…
A0A3V6W884_SALER	RHS repeat protein	CBJ97_24275	Salmonella enterica (Salmonella choleraesuis)	1352	MYEAARVDDPIYHTSALAGFLIGAIIGIAIIALAAFAFFSCGFLAGLILGFMADQIASGVLQLGEAIGRSIHHTAGKILTGSENVSTNSRPAARAVLSTVKCDNHIAEKRIAQGSENIYINSQPAARKDDHTECDAVIEDGSPNVFLGGGTQTVLEISSEIPDWLRKVVDVLFVVASLLGGLAGAWRQAAKLGTKFGTKCAAKFIGGELVGMAVGEAISGLFSNPVDVTTGQKILLPETDFTLPGRLPVICSRFYASHLETVGLLGRGWRLNWETSLREDDEHITLTGVQGRELRYPKTMLTPGHQIFDPEEQLYLSRLHDGRYVLHYTDRSYYVFGDFDSDGMAYLLFMETPHRQRIVFGHEGGRLVRIASSSGHHLLLHRTQTPAGERLSRIELVQG…
A0A3V5X2W0_SALET	RHS repeat protein	AHY46_16540	Salmonella enterica I	1352	MYEAARVDDPIYHTSALAGFLIGAIIGIAIIALAAFAFFSCGFLAGLILGFMADQIASGVLQLGEAIGRSIHHTAGKILTGSENVSTNSRPAARAVLSTVKCDNHIAEKRIAQGSENIYINSQPAARKDDHTECDAVIEDGSPNVFLGGGTQTVLEISSEIPDWLRKVVDVLFVVASLLGGLAGAWRQAAKLGTKFGTKCAAKFIGGELVGMAVGEAISGLFSNPVDVTTGQKILLPETDFTLPGRLPVTCSRFYASHLETVGLLGRGWRLNWETSLREDDEYITLTGVQGRELRYPKTMLTPGHQIFDPEEQLYLSRLHDGRYVLHYTDRSYYVFGDFDSDGMAYLLFMETPHRQRIVFGHEGGRLVRIASSSGHHLLLHRTQTPAGERLSRIELVQG…
A0A3Y7NT35_SALET	RHS repeat protein	D4536_22085 D5P59_06895 D8S37_21845 DQC77_22080 DSF92_09495	Salmonella enterica I	1352	MYEAARVDDPIYHTSALAGFLIGAIIGIAIIALAAFAFFSCGFLAGLILGFMADQIASRVLQLGEAIGRSIHHTAGKILTGSENVSTNSRPAARAVLSTVKCDNHIAEKRIAQGSENIYINSQPAARKDDHTECDAVIEDGSPNVFLGGGTQTVLEISSEIPDWLRKVVDVLFVVASLLGGLAGAWRQAAKLGTKFGTKCAAKFIGGELTGMAVSEAISGLFSNPVDVTTGQKILLPETDFTLPGRLPVTCSRFYASHLETVGLLGRGWRLNWETSLRDDDEHITLTGVQGRELRYPKTMLTPGHQIFDPEEQLYLSRLHDGRYVLHYTDRSYYVFGDFDSDGMAYLLFMETPHRQRIVFGHEGGRLVRIASSSGHHLLLHRTQTPAGERLSRIELVQG…
A0A3X7XZV3_SALER	RHS repeat protein	D6I20_21520 D6N29_25020	Salmonella enterica (Salmonella choleraesuis)	1352	MYEAARVDDPIYHTSALAGFLIGAIIGIAIIALAAFAFFSCGFLAGLILGFMADQIASGVLQLGEAIGRSIHHTAGKILTGSENVSTNSRPAARAVLSTVKCDNHIAEKRIAQGSENIYINSQPAARKDDHTECDAVIEDGSPNVFLGGGTQTVLEISSEIPDWLRKVVDVLFVVASLLGGLAGAWRQAAKLGTKFGTKCAAKFIGGELVGMAVGEAISGLFSNPVDVTTGQKILLPETDFTLPGRLPVTCSRFYASHLETVGLLGRGWRLNWETSLREDDEHITLTGVQGRELCYPKTMLTPGHQIFDPEEQLYLSRLHDGRYVLHYTDRSYYVFGDFDSDGMAYLLFMETPHRQRIVFGHEGGRLVRIASSSGHHLLLHRTQTPAGERLSRIELVQG…
A0A3U0A1V5_SALET	RHS repeat protein	DNU82_19650	Salmonella enterica I	1352	MYEAARVDDPIYHTSALAGFLIGAIIGIAIIALAAFAFFSCGFLAGLILGFMADQIASGVLQLGEAIGRSIHHTAGKILTGSENVSTNSRPAARAVLSTVKCDNHIAEKRIAQGSENIYINSQPAARKDDHTECDAVIEDGSPNVFLGGGTQTVLEISSEIPDWLRKVVDVLFVVASLLGGLAGAWRQAAKLGTKFGTKCAAKFIGGELTGMAVSEAISGLFSNPVDVTTGQKILLPETDFTLPGRLPVTCSRFYASHLETVGLLGRGWRLNWETSLREDDEHITLTGVQGRELRYPKTMLTPGHQIFDPKEQLYLSRLHDGRYVLHYTDRSYYVFGDFDSDGMAYLLFMETPHRQRIVFGHEGGRLVRIASSSGHHLLLHRTQTPAGERLSRIELVQG…
A0A3W1VKN0_SALER	RHS repeat protein	D6272_11755 D9B97_04580	Salmonella enterica (Salmonella choleraesuis)	1352	MYEAARVDDPIYHTSALAGFLIGAIIGIAIIALAAFAFFSCGFLAGLILGFMADQIASGVLQLGEAIGRSIHHTAGKILTGSENVSTNSRPAARAVLSTVKCDNHIAEKRIAQGSENIYINSQPAARKDDHTECDAVIEDGSPNVFLGGGTQTVLEISSEIPDWLRKVVDVLFVVASLLGGLAGAWRQAAKLGTKFGTKCAAKFIGGELVGMAVGEAISGLFSNPVDVTTGQKILLPETDFTLPGRLPVTCSRFYASHLETVGLLGRGWRLNWETSLRDDDEHITLTGVQGRELRYPKTMLTPGHQIFDPKEQLYLSRLHDGRYVLHYTDRSYYVFGDFDSDGMAYLLFMETPHRQRIVFGHEGGRLVRIASSSGHHLLLHRTQTPAGERLSRIELVQG…
A0A3V5ZAZ6_SALET	RHS repeat protein	A4M55_20170 AU645_17980 AXO22_14935 AXR36_06545 E0U98_09580 E1335_20150 E1849_08315 E1918_03550 E1J91_22845 E1L23_03175 EVG77_21035 EW426_21775 EWK51_06475 EX915_19980 EXB23_05405 FG748_20680 YG57_19365 YR15_04150	Salmonella enterica subsp. enterica serovar Haifa	1352	MYEAARVDDPIYHTSALAGFLIGAIIGIAIIALAAFAFFSCGFLAGLILGFMADQIASGVLQLGEAIGRSIHHTAGKILTGSENVSTNSRPAARAVLSTVKCDNHIAEKRIAQGSENIYINSQPAARKDDHTECDAVIEDGSPNVFLGGGTQTVLEISSEIPDWLRKVVDVLFVVASLLGGLAGAWRQAAKLGTKFGTKCAAKFIGGELVGMAVGEAISGLFSNPVDVTTGQKILLPETDFTLPGRLPVTCSRFYASHLETVGLLGRGWRLNWETSLRDDDEHITLTGVQGRELRYPKTMLTPGHQIFDPKEQLYLSRLHDGRYVLHYTDRSYYVFGDFDSDGMAYLLFMETPHRQRIVFGHEGGRLVRIASSSGHHLLLHRTQTPAGERLSRIELVQG…
A0A3Y6IBG7_SALET	RHS repeat protein	DUW09_19845	Salmonella enterica I	1352	MYEAARVDDPIYHTSALAGFLIGAIIGIAIIALAAFAFFSCGFLAGLILGFMADQIASGVLQLGEAIGRSIHHTAGKILTGSENVSTNSRPAARAVLSTVKCDNHIAEKRIAQGSENIYINSQPAARKDDHTECDAVIEDGSPNVFLGGGTQTVLEISSEIPDWLRKVVDVLFVVASLLGGLAGAWRQAAKLGTKFGTKCAAKFIGGELVGMAVGEAISGLFSNPVDVTTGQKILLPETDFTLPGRLPVTCSRFYASHLETVGLLGRGWRLNWETSLREDDEHITLTGVQGRELRYPKTMLTPGHQIFDPKEQLYLSRLHDGRYVLHYTDRSYYVFGDFDSDGMAYLLFMETPHRQRIVFGHEGGRLVRIASSSGHHLLLHRTQTPAGERLSRIELVQG…
A0A3V4M4R4_SALET	RHS repeat protein	AXN72_08960 XS28_06295	Salmonella enterica I	1352	MYEAARVDDPIYHTSALAGFLIGAIIGIAIIALAAFAFFSCGFLAGLILGFMADQIASGVLQLGEAIGRSIHHTAGKILTGSENVSTNSRPAARAVLSTVKCDNHIAEKRIAQGSENIYINSQPAARKDDHTECDAVIEDGSPNVFLGGGTQTVLEISSEIPDWLRKVVDVLFVVASLLGGLAGAWRQAAKLGTKFGTKCAAKFIGGELVGMAVGEAISGLFSNPVDVTTGQKILLPETDFTLPGRLPVTCSRFYASHLETVGLLGRGWRLNWETSLREDDEHITLTGVQGRELRYPKTMLTPGHQIFDPEEQLYLSRLHDGRYVLHYTDRSYYVFGDFDSDGMAYLLFMETPHRQRIVFGHEGGRLVRIASSSGHHLLLHRTQTPAGERLSRVELVQG…
A0A3V6ZZR6_SALER	RHS repeat protein	DY585_18995	Salmonella enterica (Salmonella choleraesuis)	1352	MYEAARVDDPIYHTSALAGFLIGAIIGIAIIALAAFAFFSCGFLAGLILGFMADQIASGVLQLGEAIGRSIHHTAGKILTGSENVSTNSRPAARAVLSTVKCDNHIAEKRIAQGSENIYINSQPAARKDDHTECDAVIEDGSPNVFLGGGTQTVLEISSEIPDWLRKVVDVLFVVASLLGGLAGAWRQAAKLGTKFGTKCAAKFIGGELAGMAVGEAISGLFSNPVDVTTGQKILLPETDFTLPGRLPVTCSRFYASHLETVGLLGRGWRLNWETSLREDDEHITLTGVQGRELCYPKTMLTPGHQIFDPEEQLYLSRLHDGRYVLHYTDRSYYVFGDFDSDGMAYLLFMETPHRQRIVFGHEGGRLVRIASSSGHHLLLHRTQTPAGERLSRIELVQG…
A0A3Z0LT26_SALET	RHS repeat protein (Type IV secretion protein Rhs)	DM703_19970 DMO79_11075 DPJ21_22055 DQK57_03925 DS306_19395 EHE71_13695	Salmonella enterica I	1352	MYEAARVDDPIYHTSALAGFLIGAIIGIAIIALAAFAFFSCGFLAGLILGFMADQIASGVLQLGEAIGRSIHHTAGKILTGSENVSTNSRPAARAVLSTVKCDNHIAEKRIAQGSENIYINSQPAARKDDHTECDAVIEDGSPNVFLGGGTQTVLEISSEIPDWLRKVVDVLFVVASLLGGLAGAWRQAAKLGTKFGTKCAAKFIGGELVGMAVGEAISGLFSNPVDVTTGQKILLPETDFTLPGRLPVTCSRFYASHLETVGLLGRGWRLNWETSLRDDDEHITLTGVQGRELRYPKTMLTPGHQIFDPKEQLYLSRLHDGRYVLHYTDRSYYVFGDFDSDGMAYLLFMETPHRQRIVFGHEGGRLVRIASSSGHHLLLHRTQTPAGERLSRIELVQG…
A0A3Z7IKE2_SALET	RHS repeat protein	YR14_05115	Salmonella enterica I	1352	MYEAARVDDPIYHTSALAGFLIGAIIGIAIIALAAFAFFSCGFLAGLILGFMADQIASGVLQLGEAIGRSIHHTAGKILTGSENVSTNSRPAARAVLSTVKCDNHIAEKRIAQGSENIYINSQPAARKDDHTECDAVIEDGSPNVFLGGGTQTVLEISSEIPDWLRKVVDVLFVVASLLGGLAGAWRQAAKLGTKFGTKCAAKFIGGELAGMAVGEAISGLFSNPVDVTTGQKILLPETDFTLPGRLPVTCSRFYASHLETVGLLGRGWRLNWETSLREDDEHITLTGVQGRELCYPKTMLTPGHQIFDPKEQLYLSRLHDGRYVLHYTDRSYYVFGDFDSDGMAYLLFMETPHRQRIVFGHEGGRLVRIASSSGHHLLLHRTQTPAGERLSRIELVQG…
A0A3Z0MKT9_SALET	RHS repeat protein	DUU78_19420	Salmonella enterica I	1352	MYEAARVDDPIYHTSALAGFLIGAIIGIAIIALAAFAFFSCGFLAGLILGFMADQIASGVLQLGEAIGRSIHHTAGKILTGSENVSTNSRPAARAVLSTVKCDNHIAEKRIAQGSENIYINSQPAARKDDHTECDAVIEDGSPNVFLGGGTQTVLEISSEIPDWLRKVVDVLFVVASLLGGLAGAWRQAAKLGTKFGTKCAAKFIGGELAGMAVGEAISGLFSNPVDVTTGQKILLPETDFTLPGRLPVTCSRFYASHLETVGLLGRGWRLNWETSLREDDEHITLTGVQGRELCYPKTMLTPGHQIFDPKEQLYLSRLHDGRYVLHYTDRSYYVFGDFDSDGMAYLLFMETPHRQRIVFGHEGGRLVRIASSSGHHLLLHRTQTPAGERLSRIELVQG…
A0A3V4QG13_SALET	RHS repeat protein	D1798_02440 E2C76_04500 EVJ10_05115	Salmonella enterica subsp. enterica serovar Kottbus	1352	MYEAARVDDPIYHTSALAGFLIGAIIGIAIIALAAFAFFSCGFLAGLILGFMADQIASGVLQLGEAIGRSIHHTAGKILTGSENVSTNSRPAARAVLSTVKCDNHIAEKRIAQGSENIYINSQPAARKDDHTECDAVIEDGSPNVFLGGGTQTVLEISSEIPDWLRKVVDVLFVVASLLGGLAGAWRQAAKLGTKFGTKCAAKFIGGELVGMAVGEAISGLFSNPVDVTTGQKILLPETDFTLPGRLPVTCSRFYASHLETVGLLGRGWRLNWETSLREDDEHITLTGVQGRELRYPKTMLTPGHQIFDPEEQLYLSRLHDGRYVLHYTDRSYYVFGDFDSDGMAYLLFMETPHRQRIVFGHEGGRLVRIASSSGHHLLLHRTQTPAGERLSRVELVQG…
A0A3Y4YAM7_SALET	RHS repeat protein	D5769_03445 DQJ66_03385	Salmonella enterica I	1352	MYEAARVDDPIYHTSALAGFLIGAIIGIAIIALAAFAFFSCGFLAGLILGFMADQIASGVLQLGEAIGRSIHHTAGKILTGSENVSTNSRPAARAVLSTVKCDNHIAEKRIAQGSENIYINSQPAARKDDHTECDAVIEDGSPNVFLGGGTQTVLEISSEIPDWLRKVVDVLFVVASLLGGLAGAWRQAAKLGTKFGTKCAAKFIGGELVGMAVGEAISGLFSNPVDVTTGQKILLPETDFTLPGRLPVTCSRFYASHLETVGLLGRGWRLNWETSLREDDEHITLTGVQGRELCYPKTMLTPGHQIFDPEEQLYLSRLHDGRYVLHYTDRSYYVFGDFDSDGMAYLLFMETPHRQRIVFGHEGGRLVRIASSSGHHLLLHRTQTPAGERLSRIELVQG…
A0A3V4SNH2_SALET	RHS repeat protein	BCP30_10255 CUN74_15895 FBR21_20735 FGU26_21610	Salmonella enterica subsp. enterica serovar Altona	1354	MYEAARVDDPIYHTSALAGFLIGAIIGIAIIALAAFAFFSCGFLAGLILGFMADQIASGVLQLGEAIGRSIHHTAGKILTGSENVSTNSRPAARAVLSTVKCDNHIAEKRIAQGSENIYINSQPAARKDDHTECDAVIEDGSPNVFLGGGTQTVLEISSEIPDWLRKVVDVLFVVASLLGGLAGAWRQAAKLGTKFGTKCAAKFIGGELVGMAVGEAISGLFSNPVDVTTGQKILLPETDFTLPGRLPVTCSRFYASHLETVGLLGRGWRLNWETSLREDDEHITLTGVQGRELRYPKTMLTPGHQIFDPKEQLYLSRLHDGRYVLHYTDRSYYVFGDFDSDGMAYLLFMETPHRQRIVFGHEGGRLVRIASSSGHHLLLHRTQTPAGERLSRIELVQG…
A0A3V8ENS0_SALER	RHS repeat protein	AKH36_13440 XR15_23245 XU42_19615 XY76_23255	Salmonella enterica (Salmonella choleraesuis)	1354	MYEAARVDDPIYHTSALAGFLIGAIIGIAIIALAAFAFFSCGFLAGLILGFMADQIASGVLQLGEAIGRSIHHTAGKILTGSENVSTNSRPAARAVLSTVKCDNHIAEKRIAQGSENIYINSQPAARKDDHTECDAVIEDGSPNVFLGGGTQTVLEISSEIPDWLRKVVDVLFVVASLLGGLAGAWRQAAKLGTKFGTKCAAKFIGGELVGMAVGEAISGLFSNPVDVTTGQKILLPETDFTLPGRLPVTCSRFYASHLETVGLLGRGWRLNWETSLREDDEHITLTGVQGRELRYPKTMLTPGHQIFDPEEQLYLSRLHDGRYVLHYTDRSYYVFGDFDSDGMAYLLFMETPHRQRIVFGHEGGRLVRIASSSGHHLLLHRTQTPAGERLSRIELVQG…
A0A3V2QUY1_SALER	RHS repeat protein	LZ96_22130	Salmonella enterica (Salmonella choleraesuis)	1354	MYEAARVDDPIYHTSALAGFLIGAIIGIAIIALAAFAFFSCGFLAGLILGFMADQIASGVLQLGEAIGRSIHHTAGKILTGSENVSTNSRPAARAVLSTVKCDNHIAEKRIAQGSENIYINSQPAARKDDHTECDAVIEDGSPNVFLGGGTQTVLEISSEIPDWLRKVVDVLFVVASLLGGLAGAWRQAAKLGTKFGTKCAAKFIGGELVGMAVGEAISGLFSNPVDVTTGQKILLPETDFTLPGRLPVTCSRFYASHLETVGLLGRGWRLNWETSLREDDEHITLTGVQGRELRYPKTMLTPGHQIFDPEEQLYLSRLHDGRYVLHYTDRSYYVFGDFDSDGMAYLLFMETPHRQRIVFGHEGGRLVRIASSSGHHLLLHRTQTPAGERLSRIELVQG…
A0A3U0C1V6_SALET	RHS repeat protein	DNU68_22085 DO807_21970 DQ978_22335	Salmonella enterica I	1354	MYEAARVDDPIYHTSALAGFLIGAIIGIAIIALAAFAFFSCGFLAGLILGFMADQIASGVLQLGEAIGRSIHHTAGKILTGSENVSTNSRPAARAVLSTVKCDNHIAEKRIAQGSENIYINSQPAARKDDHTECDAVIEDGSPNVFLGGGTQTVLEISSEIPDWLRKVVDVLFVVASLLGGLAGAWRQAAKLGTKFGTKCAAKFIGGELTGMAVSEAISGLFSNPVDVTTGQKILLPETDFTLPGRLPVTCSRFYASHLETVGLLGRGWRLNWETSLRDDDEHITLTGVQGRELRYPKTMLTPGHQIFDPEEQLYLSRLHDGRYVLHYTDRSYYVFGDFDSDGMAYLLFMETPHRQRIVFGHEGGRLVRIASSSGHHLLLHRTQTPAGERLSRIELVQG…
F5CQ64_SALER	Rhs-family protein		Salmonella enterica (Salmonella choleraesuis)	1354	MYEAARVDDPIYHTSALAGFLIGAIIGIAIIALAAFAFFSCGFLAGLILGFMADQIASGVLQLGEAIGRSIHHTAGKILTGSENVSTNSRPAARAVLSTVKCDNHIAEKRIAQGSGNIYINSQPAARKDDHTECDAVVEDGSPNVFLGGGTQTVLEISSEIPDWLRKVVDVLFVVASLLGGLAGAWRQAAKLGTKFGTKCAAKFIGGELTGMAVSEAISGLFSNPVDVTTGQKILLPETDFTLPGRLPVTCSRFYASHLETVGLLGQGWRLNWETSLREDDEHITLTGVQGRELRYPKMMLTPGHQIFGPKEQLYLSRLHDGRYVLHYTDRSYYVFGDFDSDGMAYLLFMETPHRQRIVFGHEGGRLVRIASSSGHHLLLHRTQTPAGERLSRIELVQG…
A0A3V2DEN1_SALET	RHS repeat protein	DSE94_23970	Salmonella enterica I	1358	MYEAARVDDPIYHTSALAGFLIGAIIGIAIIALAAFAFFSCGFLAGLILGFMADQIASGVLQLGEAIGRSIHHTAGKILTGSENVSTNSRPAARAVLSTVKCDNHIAEKRIAQGSENIYINSQPAARKDDHTECDAVIEDGSPNVFLGGGTQTVLEISSEIPDWLRKVVDVLFVVASLLGGLAGAWRQAAKLGTKFGTKCAAKFIGGELVGMAVGEAISGLFSNPVDVTTGQKILLPETDFTLPGRLPVTCSRFYASHLETVGLLGRGWRLNWETSLREDDEHITLTGVQGRELRYPKTMLTPGHQIFDPEEQLYLSRLHDGRYVLHYTDRSYYVFGDFDSDGMAYLLFMETPHRQRIVFGHEGGRLVRIASSSGHHLLLHRTQTPAGERLSRIELVQG…
A0A3W7EX76_SALER	RHS repeat protein	EG069_21040	Salmonella enterica (Salmonella choleraesuis)	1358	MYEAARVDDPIYHTSALAGFLIGAIIGIAIIALAAFAFFSCGFLAGLILGFMADQIASGVLQLGEAIGRSIHHTAGKILTGSENVSTNSRPAARAVLSTVKCDNHIAEKRIAQGSENIYINSQPAARKDDHTECDAVIEDGSPNVFLGGGTQTVLEISSEIPDWLRKVVDVLFVVASLLGGLAGAWRQAAKLGTKFGTKCAAKFIGGELVGMAVGEAISGLFSNPVDVTTGQKILLPETDFTLPGRLPVTCSRFYASHLETVGLLGRGWRLNWETSLREDDEHITLTGVQGRELRYPKTMLTLGHQIFDPEEQLYLSRLHDGRYVLHYTDRSYYVFGDFDSDGMAYLLFMETPHRQRIVFGHEGGRLVRIASSSGHHLLLHRTQTPAGERLSRIELVQG…
A0A3R0XV36_SALET	RHS repeat protein	DRU74_21460	Salmonella enterica I	1359	MYEAARVDDPIYHTSALAGFLIGAIIGIAIIALAAFAFFSCGFLAGLILGFMADQIASGVLQLGEAIGRSIHHTAGKILTGSENVSTNSRPAARAVLSTVKCDNHIAEKRIAQGSENIYINSQPAARKDDHTECDAVIEDGSPNVFLGGGTQTVLEISSEIPDWLRKVVDVLFVVASLLGGLAGAWRQAAKLGTKFGTKCAAKFIGGELAGMAVGEAISGLFSNPVDVTTGQKILLPETDFTLPGRLPVTCSRFYASHLETVGLLGRGWRLNWETSLREDDEHITLTGVQGRELCYPKTMLTPGHQIFDPEEQLYLSRLHDGRYVLHYTDRSYYVFGDFDSDGMAYLLFMETPHRQRIVFGHEGGRLVRIASSSGHHLLLHRTQTPAGERLSRIELVQG…
A0A3V7ITL9_SALRU	RHS repeat protein	A7C81_21230 AH782_17910	Salmonella rubislaw	1359	MYEAARVDDPIYHTSALAGFLIGAIIGIAIIALAAFAFFSCGFLAGLILGFMADQIASGVLQLGEAIGRSIHHTAGKILTGSENVSTNSRPAARAVLSTVKCDNHIAEKRIAQGSENIYINSQPAARKDDHTECDAVIEDGSPNVFLGGGTQTVLEISSEIPDWLRKVVDVLFVVASLLGGLAGAWRQAAKLGTKFGTKCAAKFIGGELVGMAVGEAISGLFSNPVDVTTGQKILLPETDFTLPGRLPVTCSRFYASHLETVGLLGRGWRLNWETSLREDDEHITLTGVQGRELCYPKTMLTPGHQIFDPEEQLYLSRLHDGRYVLHYTDRSYYVFGDFDSDGMAYLLFMETPHRQRIVFGHEGGRLVRIASSSGHHLLLHRTQTPAGERLSRIELVQG…
A0A3V8T2B3_SALET	RHS repeat protein	ACS18_16130	Salmonella enterica I	1359	MYEAARVDDPIYHTSALAGFLIGAIIGIAIIALAAFAFFSCGFLAGLILGFMADQIASGVLQLGEAIGRSIHHTAGKILTGSENVSTNSRPAARAVLSTVKCDNHIAEKRIAQGSENIYINSQPAARKDDHTECDAVIEDGSPNVFLGGGTQTVLEISSEIPDWLRKVVDVLFVVASLLGGLAGAWRQAAKLGTKFGTKCAAKFIGGELAGMAVGEAISGLFSNPVDVTTGQKILLPETDFTLPGRLPVTCSRFYASHLETVGLLGRGWRLNWETSLREDDEHITLTGVQGRELCYPKTMLTPGHQIFDPEEQLYLSRLHDGRYVLHYTDRSYYVFGDFDSDGMAYLLFMETPHRQRIVFGHEGGRLVRIASSSGHHLLLHRTQTPAGERLSRIELVQG…
A0A3V8KLT3_SALON	RHS repeat protein	AH620_05600	Salmonella oranienberg	1359	MYEAARVDDPIYHTSALAGFLIGAIIGIAIIALAAFAFFSCGFLAGLILGFMADQIASGVLQLGEAIGRSIHHTAGKILTGSENVSTNSRPAARAVLSTVKCDNHIAEKRIAQGSENIYINSQPAARKDDHTECDAVIEDGSPNVFLGGGTQTVLEISSEIPDWLRKVVDVLFVVASLLGGLAGAWRQAAKLGTKFGTKCAAKFIGGELAGMAVGEAISGLFSNPVDVTTGQKILLPETDFTLPGRLPVTCSRFYASHLETVGLLGRGWRLNWETSLREDDEHITLTGVQGRELCYPKTMLTPGHQIFDPEEQLYLSRLHDGRYVLHYTDRSYYVFGDFDSDGMAYLLFMETPHRQRIVFGHEGGRLVRIASSSGHHLLLHRTQTPAGERLSRIELVQG…
A0A3V9I138_SALER	RHS repeat protein	AB776_20900 D7F17_12680	Salmonella enterica (Salmonella choleraesuis)	1359	MYEAARVDDPIYHTSALAGFLIGAIIGIAIIALAAFAFFSCGFLAGLILGFMADQIASGVLQLGEAIGRSIHHTAGKILTGSENVSTNSRPAARAVLSTVKCDNHIAEKRIAQGSENIYINSQPAARKDDHTECDAVIEDGSPNVFLGGGTQTVLEISSEIPDWLRKVVDVLFVVASLLGGLAGAWRQAAKLGTKFGTKCAAKFIGGELVGMAVGEAISGLFSNPVDVTTGQKILLPETDFTLPGRLPVTCSRFYASHLETVGLLGRGWRLNWETSLREDDEHITLTGVQGRELRYPKTMLTPGHQIFDPEEQLYLSRLHDGRYVLHYTDRSYYVFGDFDSDGMAYLLFMETPHRQRIVFGHEGGRLVRIASSSGHHLLLHRTQTPAGERLSRVELVQG…
A0A3V7KUU6_SALET	RHS repeat protein	AL980_22065 E0U67_19790 E0U97_15225 E0X41_20355 EWG95_18575	Salmonella enterica subsp. enterica serovar Pomona	1359	MYEAARVDDPIYHTSALAGFLIGAIIGIAIIALAAFAFFSCGFLAGLILGFMADQIASGVLQLGEAIGRSIHHTAGKILTGSENVSTNSRPAARAVLSTVKCDNHIAEKRIAQGSENIYINSQPAARKDDHTECDAVIEDGSPNVFLGGGTQTVLEISSEIPDWLRKVVDVLFVVASLLGGLAGAWRQAAKLGTKFGTKCAAKFIGGELVGMAVGEAISGLFSNPVDVTTGQKILLPETDFTLPGRLPVTCSRFYASHLETVGLLGRGWRLNWETSLREDDEHITLTGVQGRELCYPKTMLTPGHQIFDPEEQLYLSRLHDGRYVLHYTDRSYYVFGDFDSDGMAYLLFMETPHRQRIVFGHEGGRLVRIASSSGHHLLLHRTQTPAGERLSRIELVQG…
A0A3W6S6P7_SALER	RHS repeat protein	D5U63_04005	Salmonella enterica (Salmonella choleraesuis)	1359	MYEAARVDDPIYHTSALAGFLIGAIIGIAIIALAAFAFFSCGFLAGLILGFMADQIASGVLQLGEAIGRSIHHTAGKILTGSENVSTNSRPAARAVLSTVKCDNHIAEKRIAQGSENIYINSQPAARKDDHTECDAVIEDGSPNVFLGGGTQTVLEISSEIPDWLRKVVDVLFVVASLLGGLAGAWRQAAKLGTKFGTKCAAKFIGGELVGMAVGEAISGLFSNPVDVTTGQKILLPETDFTLPGRLPVTCSRFYASHLETVGLLGRGWRLNWETSLRDDDEHITLTGVQGRELRYPKTMLTPGHQIFDPEEQLYLSRLHDGRYVLHYTDRSYYVFGDFDSDGMAYLLFMETPHRQRIVFGHEGGRLVRIASSSGHHLLLHRTQTPAGERLSRIELVQG…
A0A3Y8V9N1_SALET	RHS repeat protein (Type IV secretion protein Rhs)	ACK79_18795 AG53_16975 D7M89_06955 DKS84_12685 DMU94_18265 DOC12_14860 DOC34_12955 DPC30_19230 DQ837_06070 DQZ13_13730 DRA30_12605 DS251_13560 DU168_06920 DU852_14410 DUP59_20385 DUU47_19335 DUV63_20135 EBJ94_15865 ED432_12565	Salmonella enterica I	1359	MYEAARVDDPIYHTSALAGFLIGAIIGIAIIALAAFAFFSCGFLAGLILGFMADQIASGVLQLGEAIGRSIHHTAGKILTGSENVSTNSRPAARAVLSTVKCDNHIAEKRIAQGSENIYINSQPAARKDDHTECDAVIEDGSPNVFLGGGTQTVLEISSEIPDWLRKVVDVLFVVASLLGGLAGAWRQAAKLGTKFGTKCAAKFIGGELAGMAVGEAISGLFSNPVDVTTGQKILLPETDFTLPGRLPVTCSRFYASHLETVGLLGRGWRLNWETSLREDDEHITLTGVQGRELCYPKTMLTPGHQIFDPEEQLYLSRLHDGRYVLHYTDRSYYVFGDFDSDGMAYLLFMETPHRQRIVFGHEGGRLVRIASSSGHHLLLHRTQTPAGERLSRIELVQG…
A0A3V1QDN3_SALET	RHS repeat protein	DRV60_22475	Salmonella enterica I	1359	MYEAARVDDPIYHTSALAGFLIGAIIGIAIIALAAFAFFSCGFLAGLILGFMADQIASGVLQLGEAIGRSIHHTAGKILTGSENVSTNSRPAARAVLSTVKCDNHIAEKRIAQGSENIYINSQPAARKDDHTECDAVIEDGSPNVFLGGGTQTVLEISSEIPDWLRKVVDVLFVVASLLGGLTGAWRQAAKLGTKFGTKCAAKFIGGELVGMAVGEAISGLFSNPVDVTTGQKILLPETDFTLPGRLPVTCSRFYASHLETVGLLGRGWRLNWETSLREDDEHITLTGVQGRELCYPKTMLTPGHQIFDPEEQLYLSRLHDGRYVLHYTDRSYYVFGDFDSDGMAYLLFMETPHRQRIVFGHEGGRLVRIASSSGHHLLLHRTQTPAGERLSRIELVQG…
A0A3Z0PHL0_SALET	RHS repeat protein	DS205_22075	Salmonella enterica I	1359	MYEAARVDDPIYHTSALAGFLIGAIIGIAIIALAAFAFFSCGFLAGLILGFMADQIASGVLQLGEAIGRSNHHTAGKILTGSENVSTNSRPAARAVLSTVKCDNHIAEKRIAQGSENIYINSQPAARKDDHTECDAVIEDGSPNVFLGGGTQTVLEISSEIPDWLRKVVDVLFVVASLLGGLAGAWRQAAKLGTKFGTKCAAKFIGGELVGMAVGEAISGLFSNPVDVTTGQKILLPETDFTLPGRLPVTCSRFYASHLETVGLLGRGWRLNWETSLREDDEHITLTGVQGRELRYPKTMLTPGHQIFDPEEQLYLSRLHDGRYVLHYTDRSYYVFGDFDSDGMAYLLFMETPHRQRIVFGHEGGRLVRIASSSGHHLLLHRTQTPAGERLSRIELVQG…
A0A501ET38_SALET	RHS repeat protein (Fragment)	E9126_22730	Salmonella enterica subsp. enterica serovar Goldcoast	1359	MYEAARVDDPIYHTSALAGFLIGAIIGIAIIALAAFAFFSCGFLAGLILGFMADQIASGVLQLGEAIGRSIHHTAGKILTGSENVSTNSRPAARAVLSTVKCDNHIAEKRIAQGSENIYINSQPAARKDDHTECDAVIEDGSPNVFLGGGTQTVLEISSEIPDWLRKVVDVLFVVASLLGGLAGAWRQAAKLGTKFGTKCAAKFIGGELVGMAVGEAISGLFSNPVDVTTGQKILLPETDFTLPGRLPVTCSRFYASHLETVGLLGRGWRLNWETSLREDDEHITLTGVQGRELRYPKTMLTPGHQIFDPEEQLYLSRLHDGRYVLHYTDRSYYVFGDFDSDGMAYLLFMETPHRQRIVFGHEGGRLVRIASSSGHHLLLHRTQTPAGERLSRIELVQG…
A0A3U7LJ43_SALET	RHS repeat protein	D6Q29_22575 DQC75_21495	Salmonella enterica I	1359	MYEAARVDDPIYHTSALAGFLIGAIIGIAIIALAAFAFFSCGFLAGLILGFMADQIASGVLQLGEAIGRSIHHTAGKILTGSENVSTNSRPAARAVLSTVKCDNHIAEKRIAQGSENIYINSQPAARKDDHTECDAVIEDGSPNVFLGGGTQTVLEISSEIPDWLRKVVDVLFVVASLLGGLAGAWRQAAKLGTKFGTKCAAKFIGGELTGMAVSEAISGLFSNPVDVTTGQKILLPETDFTLPGRLPVTCSRFYASHLETVGLLGRGWRLNWETSLREDDEHITLTGVQGRELRYPKTMLTPGHQIFDPKEQLYLSRLHDGRYVLHYTDRSYYVFGDFDSDGMAYLLFMETPHRQRIVFGHEGGRLVRIASSSGHHLLLHRTQTPAGERLSRIELVQG…
A0A3U9BVY8_SALET	RHS repeat protein	DQS56_08200	Salmonella enterica I	1359	MYEAARVDDPIYHTSALAGFLIGAIIGIAIIALAAFAFFSCGFLAGLILGFMADQIASGVLQLGEAIGRSIHHTAGKILTGSENVSTNSRPAARAVLSTVKCDNHIAEKRIAQGSENIYINSQPAARKDDHTECDAVIEDGSPNVFLGGGTQTVLEISSEIPDWLRKVVDVLFVVASLLGGLAGAWRQAAKLGTKFGTKCAAKFIGGELVGMAVGEAISGLFSNPVDVTTGQKILLPETDFTLPGRLPVTCSRFYASHLETVGLLGRGWRLNWETSLREDDEHITLTGVQGRELRYPKTMLTPGHQIFDPEEQLYLSRLHDGRYVLHYTDRSYYVFGDFDSDGMAYLLFMETPHRQRIVFGHEGGRLVRIASSSGHHLLLHRTQTPAGERLSRIELVQG…
A0A3U5HYC7_SALET	RHS repeat protein	DPJ06_22075	Salmonella enterica I	1359	MYEAARVDDPIYHTSALAGFLIGAIIGIAIIALAAFAFFSCGFLAGLILGFMADQIASGVLQLGEAIGRSIHHTAGKILTGSENVSTNSRPAARAVLSTVKCDNHIAEKRIAQGSENIYINSQPAARKDDHTECDAVIEDGSPNVFLGGGTQTVLEISSEIPDWLRKVVDVLFVVASLLGGLAGAWRQAAKLGTKFGTKCAAKFIGGELVGMAVGEAISGLFSNPVDVTTGQKILLPETDFTLPGRLPVTCSRFYASHLETVGLLGRGWRLNWETSLRDDDEHITLTGVQGRELRYPKTMLTPGHQIFDPEEQLYLSRLHDGRYVLHYTDRSYYVFGDFDSDGMAYLLFMETPHRQRIVFGHEGGRLVRIASSSGHHLLLHRTQTPAGERLSRIELVQG…
A0A3Z4QQ13_SALET	RHS repeat protein	C3O10_11980	Salmonella enterica I	1359	MYEAARVDDPIYHTSALAGFLIGAIIGIAIIALAAFAFFSCGFLAGLILGFMADQIASGVLQLGEAIGRSIHHTAGKILTGSENVSTNSRPAARAVLSTVKCDNHIAEKRIAQGSENIYINSQPAARKDDHTECDAVIEDGSPNVFLGGGTQTVLEISSEIPDWLRKVVDVLFVVASLLGGLAGAWRQAAKLGTKFGTKCAAKFIGGELVGMAVGEAISGLFSNPVDVTTGQKILLPETDFTLPGRLPVTCSRFYASHLETVGLLGRGWRLNWETSLREDDEHITLTGVQGRELCYPKTMLTPGHQIFDPEEQLYLSRLHDGRYVLHYTDRSYYVFGDFDSDGMAYLLFMETPHRQRIVFGHEGGRLVRIASSSGHHLLLHRTQTPAGERLSRIELVQG…
A0A0R9P770_SALNE	RHS repeat protein (Type IV secretion protein Rhs)	AHY32_23930 BLX71_17440 EBP13_10835 SX18_20535	Salmonella newport	1359	MYEAARVDDPIYHTSALAGFLIGAIIGIAIIALAAFAFFSCGFLAGLILGFMADQIASGVLQLGEAIGRSNHHTAGKILTGSENVSTNSRPAARAVLSTVKCDNHIAEKRIAQGSENIYINSQPAARKDDHTECDAVIEDGSPNVFLGGGTQTVLEISSEIPDWLRKVVDVLFVVASLLGGLAGAWRQAAKLGTKFGTKCAAKFIGGELVGMAVGEAISGLFSNPVDVTTGQKILLPETDFTLPGRLPVTCSRFYASHLETVGLLGRGWRLNWETSLREDDEHITLTGVQGRELRYPKTMLTPGHQIFDPEEQLYLSRLHDGRYVLHYTDRSYYVFGDFDSDGMAYLLFMETPHRQRIVFGHEGGRLVRIASSSGHHLLLHRTQTPAGERLSRIELVQG…
A0A3V2GDU9_SALER	RHS repeat protein	BRR55_20410 D5568_21970 D7D27_21800 EA541_21180 EA554_13545 EAB63_21470 S824_18875	Salmonella enterica (Salmonella choleraesuis)	1359	MYEAARVDDPIYHTSALAGFLIGAIIGIAIIALAAFAFFSCGFLAGLILGFMADQIASGVLQLGEAIGRSIHHTAGKILTGSENVSTNSRPAARAVLSTVKCDNHIAEKRIAQGSENIYINSQPAARKDDHTECDAVIEDGSPNVFLGGGTQTVLEISSEIPDWLRKVVDVLFVVASLLGGLAGAWRQAAKLGTKFGTKCAAKFIGGELVGMAVGEAISGLFSNPVDVTTGQKILLPETDFTLPGRLPVTCSRFYASHLETVGLLGRGWRLNWETSLREDDEHITLTGVQGRELCYPKTMLTPGHQIFDPEEQLYLSRLHDGRYVLHYTDRSYYVFGDFDSDGMAYLLFMETPHRQRIVFGHEGGRLVRIASSSGHHLLLHRTQTPAGERLSRIELVQG…
A0A5D8V431_SALTM	RHS repeat protein	AU613_06190	Salmonella typhimurium	1359	MYEAARVDDPIYHTSALAGFLIGAIIGIAIIALAAFAFFSCGFLAGLILGFMADQIASGVLQLGEAIGRSIHHTAGKILTGSENVSTNSRPAARAVLSTVKCDNHIAEKRIAQGSENIYINSQPAARKDDHTECDAVIEDGSPNVFLGGGTQTVLEISSEIPDWLRKVVDVLFVVASLLGGLAGAWRQAAKLGTKFGTKCAAKFIGGELVGMAVGEAISGLFSNPVDVTTGQKILLPETDFTLPGRLPVTCSRFYASHLETVGLLGRGWRLNWETSLRDDDEHITLTGVQGRELRYPKTMLTPGHQIFDPEEQLYLSRLHDGRYVLHYTDRSYYVFGDFDSDGMAYLLFMETPHRQRIVFGHEGGRLVRIASSSGHHLLLHRTQTPAGERLSRIELVQG…
A0A3I5CIE1_SALER	RHS repeat protein	ATP91_08480 ATR96_10970	Salmonella enterica (Salmonella choleraesuis)	1359	MYEAARVDDPIYHTSALAGFLIGAIIGIAIIALAAFAFFSCGFLAGLILGFMADQIASGVLQLGEAIGRSIHHTAGKILTGSENVSTNSRPAARAVLSTVKCDNHIAEKRIAQGSENIYINSQPAARKDDHTECDAVIEDGSPNVFLGGGTQTVLEISSEIPDWLRKVVDVLFVVASLLGGLAGAWRQAAKLGTKFGTKCAAKFIGGELAGMAVGEAISGLFSNPVDVTTGQKILLPETDFTLPGRLPVTCSRFYASHLETVGLLGRGWRLNWETSLREDDEHITLTGVQGRELCYPKTMLTPGHQIFDPEEQLYLSRLHDGRYVLHYTDRSYYVFGDFDSDGMAYLLFMETPHRQRIVFGHEGGRLVRIASSSGHHLLLHRTQTPAGERLSRIELVQG…
A0A3T5JYD3_SALET	RHS repeat protein (Type IV secretion protein Rhs)	DLC13_07285 DPZ23_22615	Salmonella enterica I	1359	MYEAARVDDPIYHTSALAGFLIGAIIGIAIIALAAFAFFSCGFLAGLILGFMADQIASGVLQLGEAIGRSIHHTAGKILTGSENVSTNSRPAARAVLSTVKCDNHIAEKRIAQGSENIYINSQPAARKDDHTECDAVIEDGSPNVFLGGGTQTVLEISSEIPDWLRKVVDVLFVVASLLGGLAGAWRQAAKLGTKFGTKCAAKFIGGELVGMAVGEAISGLFSNPVDVTTGQKILLPETDFTLPGRLPVTCSRFYASHLETVGLLGRGWRLNWETSLRDDDEHITLTGVQGRELRYPKTMLTPGHQIFDPEEQLYLSRLHDGRYVLHYTDRSYYVFGDFDSDGMAYLLFMETPHRQRIVFGHEGGRLVRIASSSGHHLLLHRTQTPAGERLSRIELVQG…
A0A3Y0TQY1_SALET	RHS repeat protein	EBD25_09860	Salmonella enterica I	1359	MYEAARVDDPIYHTSALAGFLIGAIIGIAIIALAAFAFFSCGFLAGLILGFMADQIASGVLQLGEAIGRSIHHTAGKILTGSENVSTNSRPAARAVLSTVKCDNHIAEKRIAQGSENIYINSQPAARKDDHTECDAVIEDGSPNVFLGGGTQTVLEISSEIPDWLRKVVDVLFVVASLLGGLAGAWRQAAKLGTKFGTKCAAKFIGGELVGMAVGEAISGLFSNPVDVTTGQKILLPETDFTLPGRLPVTCSRFYASHLETVGLLGRGWRLNWETSLREDDEHITLTGVQGRELRYPKTMLTPGHQIFDPEEQLYLSRLHDGRYVLHYTDRSYYVFGDFDSDGMAYLLFMETPHRQRIVFGHEGGRLVRIASSSGHHLLLHRTQTPAGERLSRVELVQG…
A0A3T3EX45_SALMU	RHS repeat protein (Type IV secretion protein Rhs)	B6K78_02380 DCV92_22590 R805_04275 ZY65_16880	Salmonella muenchen	1359	MYEAARVDDPIYHTSALAGFLIGAIIGIAIIALAAFAFFSCGFLAGLILGFMADQIASGVLQLGEAIGRSIHHTAGKILTGSENVSTNSRPAARAVLSTVKCDNHIAEKRIAQGSENIYINSQPAARKDDHTECDAVIEDGSPNVFLGGGTQTVLEISSEIPDWLRKVVDVLFVVASLLGGLAGAWRQAAKLGTKFGTKCAAKFIGGELVGMAVGEAISGLFSNPVDVTTGQKILLPETDFTLPGRLPVTCSRFYASHLETVGLLGRGWRLNWETSLRDDDEHITLTGVQGRELRYPKTMLTPGHQIFDPEEQLYLSRLHDGRYVLHYTDRSYYVFGDFDSDGMAYLLFMETPHRQRIVFGHEGGRLVRIASSSGHHLLLHRTQTPAGERLSRIELVQG…
A0A3T8LEJ6_SALET	Type IV secretion protein Rhs	DM718_02015	Salmonella enterica I	1359	MYEAARVDDPIYHTSALAGFLIGAIIGIAIIALAAFAFFSCGFLAGLILGFMADQIASGVLQLGEAIGRSNHHTAGKILTGSENVSTNSRPAARAVLSTVKCDNHIAEKRIAQGSENIYINSQPAARKDDHTECDAVIEDGSPNVFLGGGTQTVLEISSEIPDWLRKVVDVLFVVASLLGGLAGAWRQAAKLGTKFGTKCAAKFIGGELVGMAVGEAISGLFSNPVDVTTGQKILLPETDFTLPGRLPVTCSRFYASHLETVGLLGRGWRLNWETSLREDDEHITLTGVQGRELRYPKTMLTPGHQIFDPEEQLYLSRLHDGRYVLHYTDRSYYVFGDFDSDGMAYLLFMETPHRQRIVFGHEGGRLVRIASSSGHHLLLHRTQTPAGERLSRIELVQG…
A0A3Z3AB19_SALET	RHS repeat protein	D5P94_12740	Salmonella enterica I	1359	MYEAARVDDPIYHTSALAGFLIGAIIGIAIIALAAFAFFSCGFLAGLILGFMADQIASGVLQLGEAIGRSIHHTAGKILTGSENVSTNSRPAARAVLSTVKCDNHIAEKRIAQGSENIYINSQPAARKDDHTECDAVIEDGSPNVFLGGGTQTVLEISSEIPDWLRKVVDVLFVVASLLGGLAGAWRQAAKLGTKFGTKCAAKFIGGELTGMAVSEAISGLFSNPVDVTTGQKILLPETDFTLPGRLPVTCSRFYASHLETVGLLGRGWRLNWETSLREDDEHITLTGVQGRELRYPKTMLTPGHQIFDPKEQLYLSRLHDGRYVLHYTDRSYYVFGDFDSDGMAYLLFMETPHRQRIVFGHEGGRLVRIASSSGHHLLLHRTQTPAGERLSRIELVQG…
A0A3Z2DDB3_SALET	RHS repeat protein	D6S52_20900	Salmonella enterica I	1359	MYEAARVDDPIYHTSALAGFLIGAIIGIAIIALAAFAFFSCGFLAGLILGFMADQIASGVLQLGEAIGRSIHHTAGKILTGSENVSTNSRPAARAVLSTVKCDNHIAEKRIAQGSENIYINSQPAARKDDHTECDAVIEDGSPNVFLGGGTQTVLEISSEIPDWLRKVVDVLFVVASLLGGLAGAWRQAAKLGTKFGTKCAAKFIGGELAGMAVGEAISGLFSNPVDVTTGQKILLPETDFTLPGRLPVTCSRFYASHLETVGLLGRGWRLNWETSLREDDEHITLTGVQGRELCYPKTMLTPGHQIFDPEEQLYLSRLHDGRYVLHYTDRSYYVFGDFDSDGMAYLLFMETPHRQRIVFGHEGGRLVRIASSSGHHLLLHRTQTPAGERLSRIELVQG…
A0A1S0ZHL4_SALET	Type IV secretion protein Rhs	A7T00_13325	Salmonella enterica subsp. enterica serovar Saintpaul	1359	MYEAARVDDPIYHTSALAGFLIGAIIGIAIIALAAFAFFSCGFLAGLILGFMADQIASGVLQLGEAIGRSIHHTAGKILTGSENVSTNSRPAARAVLSTVKCDNHIAEKRIAQGSENIYINSQPAARKDDHTECDAVIEDGSPNVFLGGGTQTVLEISSEIPDWLRKVVDVLFVVASLLGGLAGAWRQAAKLGTKFGTKCAAKFIGGELAGMAVGEAISGLFSNPVDVTTGQKILLPETDFTLPGRLPVTCSRFYASHLETVGLLGRGWRLNWETSLREDDEHITLTGVQGRELCYPKTMLTPGHQIFDPEEQLYLSRLHDGRYVLHYTDRSYYVFGDFDSDGMAYLLFMETPHRQRIVFGHEGGRLVRIASSSGHHLLLHRTQTPAGERLSRIELVQG…
A0A3V5UL12_SALET	RHS repeat protein	DBM07_03630 E1J79_04520 E1K74_06975 E2H10_04845 FEN67_04885 FEN80_07045	Salmonella enterica subsp. enterica serovar Eastbourne	1359	MYEAARVDDPIYHTSALAGFLIGAIIGIAIIALAAFAFFSCGFLAGLILGFMADQIASGVLQLGEAIGRSIHHTAGKILTGSENVSTNSRPAARTVLSTVKCDNHIAEKRIAQGSENIYINSQPAARKDDHTECDAVIEDGSPNVFLGGGTQTVLEISSEIPDWLRKVVDVLFVVASLLGGLAGAWRQAAKLGTKFGTKCAAKFIGGELVGMAVGEAISGLFSNPVDVTTGQKILLPETDFTLPGRLPVTCSRFYASHLETVGLLGRGWRLNWETSLREDDEHITLTGVQGRELCYPKTMLTPGHQIFDPEEQLYLSRLHDGRYVLHYTDRSYYVFGDFDSDGMAYLLFMETPHRQRIVFGHEGGRLVRIASSSGHHLLLHRTQTPAGERLSRIELVQG…
A0A0H3BNU9_SALNS	Rhs-family protein	SNSL254_A0321	Salmonella newport (strain SL254)	1359	MYEAARVDDPIYHTSALAGFLIGAIIGIAIIALAAFAFFSCGFLAGLILGFMADQIASGVLQLGEAIGRSNHHTAGKILTGSENVSTNSRPAARAVLSTVKCDNHIAEKRIAQGSENIYINSQPAARKDDHTECDAVIEDGSPNVFLGGGTQTVLEISSEIPDWLRKVVDVLFVVASLLGGLAGAWRQAAKLGTKFGTKCAAKFIGGELVGMAVGEAISGLFSNPVDVTTGQKILLPETDFTLPGRLPVTCSRFYASHLETVGLLGRGWRLNWETSLREDDEHITLTGVQGRELRYPKTMLTPGHQIFDPEEQLYLSRLHDGRYVLHYTDRSYYVFGDFDSDGMAYLLFMETPHRQRIVFGHEGGRLVRIASSSGHHLLLHRTQTPAGERLSRIELVQG…
A0A3X4QLW7_SALER	RHS repeat protein	D5445_08535	Salmonella enterica (Salmonella choleraesuis)	1359	MYEAARVDDPIYHTSALAGFLIGAIIGIAIIALAAFAFFSCGFLAGLILGFMADQIASGVLQLGEAIGRSIHHTAGKILTGSENVSTNSRPAARAVLSTVKCDNHIAEKRIAQGSENIYINSQPAARKDDHTECDAVIEDGSPNVFLGGGTQTVLEISSEIPDWLRKVVDVLFVVASLLGGLAGAWRQAAKLGTKFGTKCAAKFIGGELAGMAVGEAISGLFSNPVDVTTGQKILLPETDFTLPGRLPVTCSRFYASHLETVGLLGRGWRLNWETSLREDDEHITLTGVQGRELCYPKTMLTPGHQIFDPEEQLYLSRLHDGRYVLHYTDRSYYVFGDFDSDGMAYLLFMETPHRQRIVFGHEGGRLVRIASSSGHHLLLHRTQTPAGERLSRIELVQG…
A0A4Z9NEP5_SALMU	RHS repeat protein	FG699_007820	Salmonella muenchen	1359	MYEAARVDDPIYHTSALAGFLIGAIIGIAIIALAAFAFFSCGFLAGLILGFMADQIASGVLQLGEAIGRSIHHTAGKILTGSENVSTNSRPAARAVLSTVKCDNHIAEKRIAQGSENIYINSQPAARKDDHTECDAVIEDGSPNVFLGGGTQTVLEISSEIPDWLRKVVDVLFVVASLLGGLAGAWRQAAKLGTKFGTKCAAKFIGGEIVGMAVGEAISGLFSNPVDVTTGQKILLPETDFTLPGRLPVTCSRFYASHLETVGLLGRGWRLNWETSLRDDDEHITLTGVQGRELRYPKTMLTPGHQIFDPEEQLYLSRLHDGRYVLHYTDRSYYVFGDFDSDGMAYLLFMETPHRQRIVFGHEGGRLVRIASSSGHHLLLHRTQTPAGERLSRIELVQG…
A0A3U2BLH5_SALET	RHS repeat protein	D4444_12535 D5C34_11445 D6P63_04940 DN087_18700 DN241_04595 DPS62_09495 DPU11_06060 EBO79_11315 EC453_09540	Salmonella enterica I	1359	MYEAARVDDPIYHTSALAGFLIGAIIGIAIIALAAFAFFSCGFLAGLILGFMADQIASGVLQLGEAIGRSNHHTAGKILTGSENVSTNSRPAARAVLSTVKCDNHIAEKRIAQGSENIYINSQPAARKDDHTECDAVIEDGSPNVFLGGGTQTVLEISSEIPDWLRKVVDVLFVVASLLGGLAGAWRQAAKLGTKFGTKCAAKFIGGELVGMAVGEAISGLFSNPVDVTTGQKILLPETDFTLPGRLPVTCSRFYASHLETVGLLGRGWRLNWETSLREDDEHITLTGVQGRELRYPKTMLTPGHQIFDPEEQLYLSRLHDGRYVLHYTDRSYYVFGDFDSDGMAYLLFMETPHRQRIVFGHEGGRLVRIASSSGHHLLLHRTQTPAGERLSRIELVQG…
A0A3V6CFX3_SALET	RHS repeat protein	A4266_24395	Salmonella enterica subsp. enterica serovar Bareilly str. CFSAN001114	1359	MYEAARVDDPIYHTSALAGFLIGAIIGIAIIALAAFAFFSCGFLAGLILGFMADQIASGVLQLGEAIGRSIHHTAGKILTGSENVSTNSRPAARAVLSTVKCDNHIAEKRIAQGSENIYINSQPAARKDDHTECDAVIEDGSPNVFLGGGTQTVLEISSEIPDWLRKVVDVLFVVASLLGGLAGAWRQAAKLGTKFGTKCAAKFIGGELTGMAVSEAISGLFSNPVDVTTGQKILLPETDFTLPGRLPVTCSRFYASHLETVGLLGRGWRLNWETSLREDDEHITLTGVQGRELRYPKTMLTPGHQIFDPKEQLYLSRLHDGRYVLHYTDRSYYVFGDFDSDGMAYLLFMETPHRQRIVFGHEGGRLVRIASSSGHHLLLHRTQTPAGERLSRIELVQG…
A0A3Y5SAE9_SALAN	RHS repeat protein	ZD17_01815	Salmonella anatum	1359	MYEAARVDDPIYHTSALAGFLIGAIIGIAIIALAAFAFFSCGFLAGLILGFMADQIASGVLQLGEAIGRSIHHTAGKILTGSENVSTNSRPAARAVLSTVKCDNHIAEKRIAQGSENIYINSQPAARKDDHTECDAVIEDGSPNVFLGGGTQTVLEISSEIPDWLRKVVDVLFVVASLLGGLAGAWRQAAKLGTKFGTKCAAKFIGGELVGMAVGEAISGLFSNPVDVTTGQKILLPETDFTLPGRLPVTCSRFYASHLETVGLLGRGWRLNWETSLREDDEHITLTGVQGRELCYPKTMLTPGHQIFDPEEQLYLSRLHDGRYVLHYTDRSYYVFGDFDSDGMAYLLFMETPHRQRIVFGHEGGRLVRIASSSGHHLLLHRTQTPAGERLSRIELVQG…
A0A3T7XDZ2_SALET	RHS repeat protein (Type IV secretion protein Rhs)	AHN91_18415 DM370_07025 DNH93_07310 DNV84_04350 DRY52_07545 JF03_20800	Salmonella enterica I	1359	MYEAARVDDPIYHTSALAGFLIGAIIGIAIIALAAFAFFSCGFLAGLILGFMADQIASGVLQLGEAIGRSIHHTAGKILTGSENVSTNSRPAARAVLSTVKCDNHIAEKRIAQGSENIYINSQPAARKDDHTECDAVIEDGSPNVFLGGGTQTVLEISSEIPDWLRKVVDVLFVVASLLGGLAGAWRQAAKLGTKFGTKCAAKFIGGELVGMAVGEAISGLFSNPVDVTTGQKILLPETDFTLPGRLPVTCSRFYASHLETVGLLGRGWRLNWETSLREDDEYITLTGVQGRELRYPKTMLTPGHQIFDPEEQLYLSRLHDGRYVLHYTDRSYYVFGDFDSDGMAYLLFMETPHRQRIVFGHEGGRLVRIASSSGHHLLLHRTQTPAGERLSRIELVQG…
A0A3Z0YKL5_SALON	RHS repeat protein	ZU40_08815	Salmonella oranienberg	1359	MYEAARVDDPIYHTSALAGFLIGAIIGIAIIALAAFAFFSCGFLAGLILGFMADQIASGVLQLGEAIGRSIHHTAGKILTGSENVSTNSRPAARAVLSTVKCDNHIAEKRIAQGSENIYINSQPAARKDDHTECDAVIEDGSPNVFLGGGTQTVLEISSEIPDWLRKVVDVLFVVASLLGGLAGAWRQAAKLGTKFGTKCAAKFIGGELVGMAVGEAISGLFSNPVDVTTGQKILLPETDFTLPGRLPVTCSRFYASHLETVGLLGRGWRLNWETSLREDDEHITLTGVQGRELRYPKTMLTPGHQIFDPEEQLYLSRLHDGRYVLHYTDRSYYVFGDFDSDGMAYLLFMETPHRQRIVFGHEGGRLVRIASSSGHHLLLHRTQTPAGERLSRIELVQG…
A0A3T2YR33_SALET	RHS repeat protein (Type IV secretion protein Rhs)	A4I59_07080 A4I91_17925 A4N91_09355 DCV74_21055 E0U21_20200 E0X33_18285 E1706_11925 E2H17_09165 E2L14_14115 E4N57_08970 EU313_12305 EW424_09750 EXP90_14220 EZV96_15135	Salmonella enterica subsp. enterica serovar Panama	1359	MYEAARVDDPIYHTSALAGFLIGAIIGIAIIALAAFAFFSCGFLAGLILGFMADQIASGVLQLGEAIGRSIHHTAGKILTGSENVSTNSRPAARAVLSTVKCDNHIAEKRIAQGSENIYINSQPAARKDDHTECDAVIEDGSPNVFLGGGTQTVLEISSEIPDWLRKVVDVLFVVASLLGGLAGAWRQAAKLGTKFGTKCAAKFIGGELAGMAVGEAISGLFSNPVDVTTGQKILLPETDFTLPGRLPVTCSRFYASHLETVGLLGRGWRLNWETSLREDDEHITLTGVQGRELCYPKTMLTPGHQIFDPEEQLYLSRLHDGRYVLHYTDRSYYVFGDFDSDGMAYLLFMETPHRQRIVFGHEGGRLVRIASSSGHHLLLHRTQTPAGERLSRIELVQG…
A0A3V0B369_SALET	RHS repeat protein	D4Z75_05780 D5782_04620 DRE69_11900	Salmonella enterica I	1359	MYEAARVDDPIYHTSALAGFLIGAIIGIAIIALAAFAFFSCGFLAGLILGFMADQIASGVLQLGEAIGRSIHHTAGKILTGSENVSTNSRPAARAVLSTVKCDNHIAEKRIAQGSENIYINSQPAARKDDHTECDAVIEDGSPNVFLGGGTQTVLEISSEIPDWLRKVVDVLFVVASLLGGLAGAWRQAAKLGTKFGTKCAAKFIGGELVGMAVGEAISGLFSNPVDVTTGQKILLPETDFTLPGRLPVTCSRFYASHLETVGLLGRGWRLNWETSLREDDEHITLTGVQGRELRYPKTMLTPGHQIFDPEEQLYLSRLHDGRYVLHYTDRSYYVFGDFDSDGMAYLLFMETPHRQRIVFGHEGGRLVRIASSSGHHLLLHRTQTPAGERLSRVELVQG…
A0A3T5DFI8_SALET	RHS repeat protein (Type IV secretion protein Rhs)	BXD49_16365 D4E01_15135 DLC21_17550 DOR52_17730 DRK15_22210	Salmonella enterica I	1359	MYEAARVDDPIYHTSALAGFLIGAIIGIAIIALAAFAFFSCGFLAGLILGFMADQIASGVLQLGEAIGRSIHHTAGKILTGSENVSTNSRPAARAVLSTVKCDNHIAEKRIAQGSENIYINSQPAARKDDHTECDAVIEDGSPNVFLGGGTQTVLEISSEIPDWLRKVVDVLFVVASLLGGLAGAWRQAAKLGTKFGTKCAAKFIGGELVGMAVGEAISGLFSNPVDVTTGQKILLPETDFTLPGRLPVTCSRFYASHLETVGLLGRGWRLNWETSLREDDEHITLTGVQGRELCYPKTMLTPGHQIFDPEEQLYLSRLHDGRYVLHYTDRSYYVFGDFDSDGMAYLLFMETPHRQRIVFGHEGGRLVRIASSSGHHLLLHRTQTPAGERLSRIELVQG…
A0A3W6LXB0_SALER	RHS repeat protein (Type IV secretion protein Rhs)	ABG56_11435 C6191_23475 C6254_15510 D6319_10315 D7D75_08075 D8M75_23385 D8V44_22635 DED04_19040 EA933_18990 EAU97_23015 EG764_17775 EGA40_07950 EIU05_08505 EIU30_13910 KO63_21780	Salmonella enterica (Salmonella choleraesuis)	1359	MYEAARVDDPIYHTSALAGFLIGAIIGIAIIALAAFAFFSCGFLAGLILGFMADQIASGVLQLGEAIGRSIHHTAGKILTGSENVSTNSRPAARAVLSTVKCDNHIAEKRIAQGSENIYINSQPAARKDDHTECDAVIEDGSPNVFLGGGTQTVLEISSEIPDWLRKVVDVLFVVASLLGGLAGAWRQAAKLGTKFGTKCAAKFIGGELTGMAVSEAISGLFSNPVDVTTGQKILLPETDFTLPGRLPVTCSRFYASHLETVGLLGRGWRLNWETSLREDDEHITLTGVQGRELRYPKTMLTPGHQIFDPKEQLYLSRLHDGRYVLHYTDRSYYVFGDFDSDGMAYLLFMETPHRQRIVFGHEGGRLVRIASSSGHHLLLHRTQTPAGERLSRIELVQG…
A0A3V9AHV6_SALET	RHS repeat protein	LB54_09635	Salmonella enterica I	1359	MYEAARVDDPIYHTSALAGFLIGAIIGIAIIALAAFAFFSCGFLAGLILGFMADQIASGVLQLGEAIGRSIHHTAGKILTGSENVSTNSRPAARAVLSTVKCDNHIAEKRIAQGSENIYINSQPAARKDDHTECDAVIEDGSPNVFLGGGTQTVLEISSEIPDWLRKVVDVLFVVASLLGGLAGAWRQAAKLGTKFGTKCAAKFIGGELAGMAVGEAISGLFSNPVDVTTGQKILLPETDFTLPGRLPVTCSRFYASHLETVGLLGRGWRLNWETSLREDDEHITLTGVQGRELCYPKTMLTPGHQIFDPEEQLYLSRLHDGRYVLHYTDRSYYVFGDFDSDGMAYLLFMETPHRQRIVFGHEGGRLVRIASSSGHHLLLHRTQTPAGERLSRIELVQG…
A0A3X9GAA5_SALET	RHS repeat protein	DPA36_16145 EHE81_20260	Salmonella enterica I	1359	MYEAARVDDPIYHTSALAGFLIGAIIGIAIIALAAFAFFSCGFLAGLILGFMADQIASGVLQLGEAIGRSIHHTAGKILTGSENVSTNSRPAARAVLSTVKCDNHIAEKRIAQGSENIYINSQPAARKDDHTECDAVIEDGSPNVFLGGGTQTVLEISSEIPDWLRKVVDVLFVVASLLGGLAGAWRQAAKLGTKFGTKCAAKFIGGELVGMAVGEAISGLFSNPVDVTTGQKILLPETDFTLPGRLPVTCSRFYASHLETVGLLGRGWRLNWETSLRDDDEHITLTGVQGRELRYPKTMLTPGHQIFDPEEQLYLSRLHDGRYVLHYTDRSYYVFGDFDSDGMAYLLFMETPHRQRIVFGHEGGRLVRIASSSGHHLLLHRTQTPAGERLSRIELVQG…
A0A3V4ZXG8_SALET	RHS repeat protein	AXO05_09530 D6Q32_07350 DNU33_05435 DQ986_18910 EIW64_20750	Salmonella enterica I	1359	MYEAARVDDPIYHTSALAGFLIGAIIGIAIIALAAFAFFSCGFLAGLILGFMADQIASGVLQLGEAIGRSIHHTAGKILTGSENVSTNSRPAARTVLSTVKCDNHIAEKRIAQGSENIYINSQPAARKDDHTECDAVIEDGSPNVFLGGGTQTVLEISSEIPDWLRKVVDVLFVVASLLGGLAGAWRQAAKLGTKFGTKCAAKFIGGELVGMAVGEAISGLFSNPVDVTTGQKILLPETDFTLPGRLPVTCSRFYASHLETVGLLGRGWRLNWETSLREDDEHITLTGVQGRELCYPKTMLTPGHQIFDPEEQLYLSRLHDGRYVLHYTDRSYYVFGDFDSDGMAYLLFMETPHRQRIVFGHEGGRLVRIASSSGHHLLLHRTQTPAGERLSRIELVQG…
A0A3U8IVC8_SALET	RHS repeat protein	R077_20160	Salmonella enterica subsp. enterica serovar Saintpaul	1359	MYEAARVDDPIYHTSALAGFLIGAIIGIAIIALAAFAFFSCGFLAGLILGFMADQIASGVLQLGEAIGRSIHHTAGKILTGSENVSTNSRPAARAVLSTVKCDNHIAEKRIAQGSENIYINSQPAARKDDHTECDAVIEDGSPNVFLGGGTQTVLEISSEIPDWLRKVVDVLFVVASLLGGLAGAWRQAAKLGTKFGTKCAAKFIGGELVGMAVGEAISGLFSNPVDVTTGQKILLPETDFTLPGRLPVTCSRFYASHLETVGLLGRGWRLNWETSLREDDEHITLTGVQGRELRYPKTMLTPGHQIFDPEEQLYLSRLHDGRYVLHYTDRSYYVFGDFDSDGMAYLLFMETPHRQRIVFGHEGGRLVRIASSSGHHLLLHRTQTPAGERLSRVELVQG…
A0A3U1FZW8_SALET	RHS repeat protein	DNZ91_13745	Salmonella enterica I	1359	MYEAARVDDPIYHTSALAGFLIGAIIGIAIIALAAFAFFSCGFLAGLILGFMADQIASGVLQLGEAIGRSIHHTAGKILTGSENVSTNSRPAARAVLSTVKCDNHIAEKRIAQGSENIYINSQPAARKDDHTECDAVIEDGSPNVFLGGGTQTVLEISSEIPDWLRKVVDVLFVVASLLGGLAGAWRQAAKLGTKFGTKCAAKFIGGELVGMAVGEAISGLFSNPVDVTTGQKILLPETDFTLPGRLPVTCSRFYASHLETVGLLGRGWRLNWETSLREDDEYITLTGVQGRELRYPKTMLTPGHQIFDPEEQLYLSRLHDGRYVLHYTDRSYYVFGDFDSDGMAYLLFMETPHRQRIVFGHEGGRLVRIASSSGHHLLLHRTQTPAGERLSRIELVQG…
A0A3T3DB15_SALNE	Type IV secretion protein Rhs	DCV87_21000	Salmonella newport	1359	MYEAARVDDPIYHTSALAGFLIGAIIGIAIIALAAFAFFSCGFLAGLILGFMADQIASGVLQLGEAIGRSIHHTAGKILTGSENVSTNSRPAARAVLSTVKCDNHIAEKRIAQGSENIYINSQPAARKDDHTECDAVIEDGSPNVFLGGGTQTVLEISSEIPDWLRKVVDVLFVVASLLGGLAGAWRQAAKLGTKFGTKCAAKFIGGELAGMAVGEAISGLFSNPVDVTTGQKILLPETDFTLPGRLPVTCSRFYASHLETVGLLGRGWRLNWETSLREDDEHITLTGVQGRELCYPKTMLTPGHQIFDPEEQLYLSRLHDGRYVLHYTDRSYYVFGDFDSDGMAYLLFMETPHRQRIVFGHEGGRLVRIASSSGHHLLLHRTQTPAGERLSRIELVQG…
A0A3V9FBI2_SALET	RHS repeat protein	ALX58_18815 DNP18_22175 DU949_20245	Salmonella enterica I	1359	MYEAARVDDPIYHTSALAGFLIGAIIGIAIIALAAFAFFSCGFLAGLILGFMADQIASGVLQLGEAIGRSIHHTAGKILTGSENVSTNSRPAARAVLSTVKCDNHIAEKRIAQGSENIYINSQPAARKDDHTECDAVIEDGSPNVFLGGGTQTVLEISSEIPDWLRKVVDVLFVVASLLGGLAGAWRQAAKLGTKFGTKCAAKFIGGELAGMAVGEAISGLFSNPVDVTTGQKILLPETDFTLPGRLPVTCSRFYASHLETVGLLGRGWRLNWETSLREDDEHITLTGVQGRELCYPKTMLTPGHQIFDPEEQLYLSRLHDGRYVLHYTDRSYYVFGDFDSDGMAYLLFMETPHRQRIVFGHEGGRLVRIASSSGHHLLLHRTQTPAGERLSRIELVQG…
A0A3V2TLC8_SALET	RHS repeat protein	D9P43_17825 DP728_18955 ECA57_22645 KO25_21735 QC88_21245 R133_21275	Salmonella enterica I	1359	MYEAARVDDPIYHTSALAGFLIGAIIGIAIIALAAFAFFSCGFLAGLILGFMADQIASGVLQLGEAIGRSIHHTAGKILTGSENVSTNSRPAARAVLSTVKCDNHIAEKRIAQGSENIYINSQPAARKDDHTECDAVIEDGSPNVFLGGGTQTVLEISSEIPDWLRKVVDVLFVVASLLGGLAGAWRQAAKLGTKFGTKCAAKFIGGELAGMAVGEAISGLFSNPVDVTTGQKILLPETDFTLPGRLPVTCSRFYASHLETVGLLGRGWRLNWETSLREDDEHITLTGVQGRELCYPKTMLTPGHQIFDPEEQLYLSRLHDGRYVLHYTDRSYYVFGDFDSDGMAYLLFMETPHRQRIVFGHEGGRLVRIASSSGHHLLLHRTQTPAGERLSRIELVQG…
A0A3X7LTJ6_SALER	RHS repeat protein	D6G00_24630 EG547_10080	Salmonella enterica (Salmonella choleraesuis)	1359	MYEAARVDDPIYHTSALAGFLIGAIIGIAIIALAAFAFFSCGFLAGLILGFMADQIASGVLQLGEAIGRSIHHTAGKILTGSENVSTNSRPAARAVLSTVKCDNHIAEKRIAQGSENIYINSQPAARKDDHTECDAVIEDGSPNVFLGGGTQTVLEISSEIPDWLRKVVDVLFVVASLLGGLAGAWRQAAKLGTKFGTKCAAKFIGGEIVGMAVGEAISGLFSNPVDVTTGQKILLPETDFTLPGRLPVTCSRFYASHLETVGLLGRGWRLNWETSLRDDDEHITLTGVQGRELRYPKTMLTPGHQIFDPEEQLYLSRLHDGRYVLHYTDRSYYVFGDFDSDGMAYLLFMETPHRQRIVFGHEGGRLVRIASSSGHHLLLHRTQTPAGERLSRIELVQG…
A0A509CIM9_9ENTR	Type IV secretion protein Rhs	wapA_2 NCTC6947_03746	Salmonella sp. NCTC 6947	1359	MYEAARVDDPIYHTSALAGFLIGAIIGIAIIALAAFAFFSCGFLAGLILGFMADQIASGVLQLGEAIGRSIHHTAGKILTGSENVSTNSRPAARAVLSTVKCDNHIAEKRIAQGSENIYINSQPAARKDDHTECDAVIEDGSPNVFLGGGTQTVLEISSEIPDWLRKVVDVLFVVASLLGGLAGAWRQAAKLGTKFGTKCAAKFIGGELVGMAVGEAISGLFSNPVDVTTGQKILLPETDFTLPGRLPVTCSRFYASHLETVGLLGRGWRLNWETSLRDDDEHITLTGVQGRELRYPKTMLTPGHQIFDPEEQLYLSRLHDGRYVLHYTDRSYYVFGDFDSDGMAYLLFMETPHRQRIVFGHEGGRLVRIASSSGHHLLLHRTQTPAGERLSRIELVQG…
A0A3W6K8L3_SALER	RHS repeat protein	EBG12_22485	Salmonella enterica (Salmonella choleraesuis)	1359	MYEAARVDDPIYHTSALAGFLIGAIIGIAIIALAAFAFFSCGFLAGLILGFMADQIASGVLQLGEAIGRSIHHTAGKILTGSENVSTNSRPAARAVLSTVKCDNHIAEKRIAQGSENIYINSQPAARKDDHTECDAVIEDGSPNVFLGGGTQTVLEISSEIPDWLRKVVDVLFVVASLLGGLAGAWRQAAKLGTKFGTKCAAKFIGGELTGMAVSEAISGLFSNPVDVTTGQKILLPETDFTLPGRLPVTCSRFYASHLETVGLLGRGWRLNWETSLREDDEHITLTGVQGRELRYPKTMLTPGHQIFDPKEQLYLSRLHDGRYVLHYTDRSYYVFGDFDSDGMAYLLFMETPHRQRIVFGHEGGRLVRIASSSGHHLLLHRTQTPAGERLSRIELVQG…
A0A3U6IBJ4_SALER	RHS repeat protein	DPI18_18290	Salmonella enterica (Salmonella choleraesuis)	1359	MYEAARVDDPIYHTSALAGFLIGAIIGIAIIALAAFAFFSCGFLAGLILGFMADQIASGVLQLGEAIGRSIHHTAGKILTGSENVSTNSRPAARAVLSTVKCDNHIAEKRIAQGSENIYINSQPAARKDDHTECDAVIEDGSPNVFLGGGTQTVLEISSEIPDWLRKVVDVLFVVASLLGGLAGAWRQAAKLGTKFGTKCAAKFIGGELVGMAVGEAISGLFSNPVDVTTGQKILLPETDFTLPGRLPVTCSRFYASHLETVGLLGRGWRLNWETSLRDDDEHITLTGVQGRELRYPKTMLTPGHQIFDPEEQLYLSRLHDGRYVLHYTDRSYYVFGDFDSDGMAYLLFMETPHRQRIVFGHEGGRLVRIASSSGHHLLLHRTQTPAGERLSRIELVQG…
A0A3U6BT75_SALET	RHS repeat protein	DPR96_14555	Salmonella enterica I	1359	MYEAARVDDPIYHTSALAGFLIGAIIGIAIIALAAFAFFSCGFLAGLILGFMADQIASGVLQLGEAIGRSIHHTAGKILTGSENVSTNSRPAARAVLSTVKCDNHIAEKRIPQGSENIYINSQPAARKDDHTECDAVIEDGSPNVFLGGGTQTVLEISSEIPDWLRKVVDVLFVVASLLGGLAGAWRQAAKLGTKFGTKCAAKFIGGELVGMAVGEAISGLFSNPVDVTTGQKILLPETDFTLPGRLPVTCSRFYASHLETVGLLGRGWRLNWETSLREDDEHITLTGVQGRELCYPKTMLTPGHQIFDPEEQLYLSRLHDGRYVLHYTDRSYYVFGDFDSDGMAYLLFMETPHRQRIVFGHEGGRLVRIASSSGHHLLLHRTQTPAGERLSRIELVQG…
A0A3V2JQB0_SALNE	RHS repeat protein	OT59_23200	Salmonella newport	1359	MYEAARVDDPIYHTSALAGFLIGAIIGIAIIALAAFAFFSCGFLAGLILGFMADQIASGVLQLGEAIGRSIHHTAGKILTGSENVSTNSRPAARAVLSTVKCDNHIAEKRIAQGSENIYINSQPAARKDDHTECDAVIEDGSPNVFLGGGTQTVLEISSEIPDWLRKVVDVLFVVASLLGGLAGAWRQAAKLGTKFGTKCAAKFIGGELTGMAVSEAISGLFSNPVDVTTGQKILLPETDFTLPGRLPVTCSRFYASHLETVGLLGRGWRLNWETSLREDDEHITLTGVQGRELRYPKTMLTPGHQIFDPKEQLYLSRLHDGRYVLHYTDRSYYVFGDFDSDGMAYLLFMETPHRQRIVFGHEGGRLVRIASSSGHHLLLHRTQTPAGERLSRIELVQG…
A0A3X2FB95_SALER	RHS repeat protein	EAM93_21990 R929_10810	Salmonella enterica (Salmonella choleraesuis)	1359	MYEAARVDDPIYHTSALAGFLIGAIIGIAIIALAAFAFFSCGFLAGLILGFMADQIASGVLQLGEAIGRSIHHTAGKILTGSENVSTNSRPAARAVLSTVKCDNHIAEKRIAQGSENIYINSQPAARKDDHTECDAVIEDGSPNVFLGGGTQTVLEISSEIPDWLRKVVDVLFVVASLLGGLAGAWRQAAKLGTKFGTKCAAKFIGGELVGMAVGEAISGLFSNPVDVTTGQKILLPETDFTLPGRLPVTCSRFYASHLETVGLLGRGWRLNWETSLREDDEHITLTGVQGRELRYPKTMLTPGHQIFVPEEQLYLSRLHDGRYVLHYTDRSYYVFGDFDSDGMAYLLFMETPHRQRIVFGHEGGRLVRIASSSGHHLLLHRTQTPAGERLSRVELVQG…
A0A3X6BQM7_SALER	RHS repeat protein	D8V55_22170	Salmonella enterica (Salmonella choleraesuis)	1359	MYEAARVDDPIYHTSALAGFLIGAIIGIAIIALAAFAFFSCGFLAGLILGFMADQIASGVLQLGEAIGRSNHHTAGKILTGSENVSTNSRPAARAVLSTVKCDNHIAEKRIAQGSENIYINSQPAARKDDHTECDAVIEDGSPNVFLGGGTQTVLEISSEIPDWLRKVVDVLFVVASLLGGLAGAWRQAAKLGTKFGTKCAAKFIGGELVGMAVGEAISGLFSNPVDVTTGQKILLPETDFTLPGRLPVTCSRFYASHLETVGLLGRGWRLNWETSLREDDEHITLTGVQGRELRYPKTMLTPGHQIFDPEEQLYLSRLHDGRYVLHYTDRSYYVFGDFDSDGMAYLLFMETPHRQRIVFGHEGGRLVRIASSSGHHLLLHRTQTPAGERLSRIELVQG…
A0A3W8M782_SALER	RHS repeat protein	D9R76_04970	Salmonella enterica (Salmonella choleraesuis)	1359	MYEAARVDDPIYHTSALAGFLIGAIIGIAIIALAAFAFFSCGFLAGLILGFMADQIASGVLQLGEAIGRSIHHTAGKILTGSENVSTNSRPAARAVLSTVKCDNHIAEKRIAQGSENIYINSQPAARKDDHTECDAVIEDGSPNVFLGGGTQTVLEISSEIPDWLRKVVDVLFVVASLLGGLAGAWRQAAKLGTKFGTKCAAKFIGGELVGMAVGESISGLFSNPVDVTTGQKILLPETDFTLPGRLPVTCSRFYASHLETVGLLGRGWRLNWETSLREDDEHITLTGVQGRELRYPKTMLTPGHQIFDPEEQLYLSRLHDGRYVLHYTDRSYYVFGDFDSDGMAYLLFMETPHRQRIVFGHEGGRLVRIASSSGHHLLLHRTQTPAGERLSRIELVQG…
A0A3T2ZTR2_SALET	Type IV secretion protein Rhs	DCV70_19675	Salmonella enterica subsp. enterica serovar Schwarzengrund	1359	MYEAARVDDPIYHTSALAGFLIGAIIGIAIIALAAFAFFSCGFLAGLILGFMADQIASGVLQLGEAIGRSIHHTAGKILTGSENVSTNSRPAARAVLSTVKCDNHIAEKRIAQGSENIYINSQPAARKDDHTECDAVIEDGSPNVFLGGGTQTVLEISSEIPDWLRKVVDVLFVVASLLGGLAGAWRQAAKLGTKFGTKCAAKFIGGELAGMAVGEAISGLFSNPVDVTTGQKILLPETDFTLPGRLPVTCSRFYASHLETVGLLGRGWRLNWETSLREDDEHITLTGVQGRELCYPKTMLTPGHQIFDPEEQLYLSRLHDGRYVLHYTDRSYYVFGDFDSDGMAYLLFMETPHRQRIVFGHEGGRLVRIASSSGHHLLLHRTQTPAGERLSRIELVQG…
A0A3Y5WVH3_SALET	RHS repeat protein	DUA46_23970	Salmonella enterica I	1359	MYEAARVDDPIYHTSALAGFLIGAIIGIAIIALAAFAFFSCGFLAGLILGFMADQIASGVLQLGEAIGRSIHHTAGKILTGSENVSTNSRPAARAVLSTVKCDNHIAEKRIAQGSENIYINSQPAARKDDHTECDAVIEDGSPNVFLGGGTQTVLEISSEIPDWLRKVVDVLFVVASLLGGLAGAWRQAAKLGTKFGTKCAAKFIGGELTGMAVSEAISGLFSNPVDVTTGQKILLPETDFTLPGRLPVTCSRFYASHLETVGLLGRGWRLNWETSLREDDEHITLTGVQGRELRYPKTMLTPGHQIFDPKEQLYLSRLHDGRYVLHYTDRSYYVFGDFDSDGMAYLLFMETPHRQRIVFGHEGGRLVRIASSSGHHLLLHRTQTPAGERLSRIELVQG…
A0A3U3QQJ5_SALET	RHS repeat protein	DOV71_05755	Salmonella enterica I	1359	MYEAARVDDPIYHTSALAGFLIGAIIGIAIIALAAFAFFSCGFLAGLILGFMADQIASGVLQLGEAIGRSIHHTAGKILTGSENVSTNSRPAARAVLSTVKCDNHIAEKRIAQGSENIYINSQPAARKDDHTECDAVIEDGSPNVFLGGGTQTVLEISSEIPDWLRKVVDVLFVVASLLGGLAGAWRQAAKLGTKFGTKCAAKFIGGELVGMAVGESISGLFSNPVDVTTGQKILLPETDFTLPGRLPVTCSRFYASHLETVGLLGRGWRLNWETSLREDDEHITLTGVQGRELRYPKTMLTPGHQIFDPEEQLYLSRLHDGRYVLHYTDRSYYVFGDFDSDGMAYLLFMETPHRQRIVFGHEGGRLVRIASSSGHHLLLHRTQTPAGERLSRIELVQG…
A0A3Z5H0N9_SALET	RHS repeat protein (Type IV secretion protein Rhs)	D4Y38_22590 D6P41_21130 D7N15_21610 DK030_22070 DLF22_22245 DNV18_20790 DOH41_04505 DP778_22095 DQQ27_16395 DRE12_21145 DRE92_20515 DRL96_21555	Salmonella enterica I	1359	MYEAARVDDPIYHTSALAGFLIGAIIGIAIIALAAFAFFSCGFLAGLILGFMADQIASGVLQLGEAIGRSIHHTAGKILTGSENVSTNSRPAARAVLSTVKCDNHIAEKRIAQGSENIYINSQPAARKDDHTECDAVIEDGSPNVFLGGGTQTVLEISSEIPDWLRKVVDVLFVVASLLGGLAGAWRQAAKLGTKFGTKCAAKFIGGELVGMAVGEAISGLFSNPVDVTTGQKILLPETDFTLPGRLPVTCSRFYASHLETVGLLGRGWRLNWETSLREDDEHITLTGVQGRELRYPKTMLTPGHQIFDPEEQLYLSRLHDGRYVLHYTDRSYYVFGDFDSDGMAYLLFMETPHRQRIVFGHEGGRLVRIASSSGHHLLLHRTQTPAGERLSRVELVQG…
A0A3U8MR93_SALET	RHS repeat protein	D7O55_22460 EA485_17790 T160_21955	Salmonella enterica subsp. enterica serovar Saintpaul	1359	MYEAARVDDPIYHTSALAGFLIGAIIGIAIIALAAFAFFSCGFLAGLILGFMADQIASGVLQLGEAIGRSIHHTAGKILTGSENVSTNSRPAARAVLSTVKCDNHIAEKRIAQGSENIYINSQPAARKDDHTECDAVIEDGSPNVFLGGGTQTVLEISSEIPDWLRKVVDVLFVVASLLGGLAGAWRQAAKLGTKFGTKCAAKFIGGELVGMAVGEAISGLFSNPVDVTTGQKILLPETDFTLPGRLPVTCSRFYASHLETVGLLGRGWRLNWETSLREDDEHITLTGVQGRELRYPKTMLTPGHQIFDPEEQLYLSRLHDGRYVLHYTDRSYYVFGDFDSDGMAYLLFMETPHRQRIVFGHEGGRLVRIASSSGHHLLLHRTQTPAGERLSRVELVQG…
A0A3T8LY99_SALET	RHS repeat protein (Type IV secretion protein Rhs)	DM700_11930 DVF58_20750 YH39_22455	Salmonella enterica I	1359	MYEAARVDDPIYHTSALAGFLIGAIIGIAIIALAAFAFFSCGFLAGLILGFMADQIASGVLQLGEAIGRSIHHTAGKILTGSENVSTNSRPAARAVLSTVKCDNHIAEKRIAQGSENIYINSQPAARKDDHTECDAVIEDGSPNVFLGGGTQTVLEISSEIPDWLRKVVDVLFVVASLLGGLAGAWRQAAKLGTKFGTKCAAKFIGGELVGMAVGEAISGLFSNPVDVTTGQKILLPETDFTLPGRLPVTCSRFYASHLETVGLLGRGWRLNWETSLRDDDEHITLTGVQGRELRYPKTMLTPGHQIFDPEEQLYLSRLHDGRYVLHYTDRSYYVFGDFDSDGMAYLLFMETPHRQRIVFGHEGGRLVRIASSSGHHLLLHRTQTPAGERLSRVELVQG…
A0A026V552_ECOLX	Type IV secretion protein Rhs	BW70_02805	Escherichia coli O174:H8 str. 04-3038	1610	MSEGPGGPQGATAGGTLAMRMLSQQAMVASQMKRAANDKAIAQMLASKKSGPPAARLGDEIQHKSFLGALAGAVLGAIVTIAEGCLIMAACATGPYALVLVPALMYASYKASDYVEEKQNQLESWINSFCDTDGAINTGSENVNINGKPAARAAVTLPPPPPPGAIPEVPQGEPSWGDIATDLLESAAEKAVPLAKAWGNAVITLTDSNAGFMDRVSAGASLLFPAGPVLMEFATMVGGRGEIKKDVDFPEAGEDTALCDKENKPPRIAQGSSNVFINNQPAARQGDKLECSAAIVGGSPDVFIGGEQVTYLDIQPEFPPWQRMIQGGITIASYLLPPAGLLGKLKNLARLGKLGNLLGAKLGALLGKTGKSLKSIANKVIRWVTDPVDPVTGAYCDER…
A0A3Y8CPJ8_SALET	RHS repeat protein	DRY54_22895 EBK05_22235	Salmonella enterica I	1362	MYEAARVDDPIYHTSALAGFLIGAIIGIAIIALAAFAFFSCGFLAGLILGFMADQIASGVLQLGEAIGRSIHHTAGKILTGSENVSTNSRPAARAVLSTVKCDNHIAEKRIAQGSENIYINSQPAARKDDHTECDAVIEDGSPNVFLGGGTQTVLEISSEIPDWLRKVVDVLFVVASLLGGLAGAWRQAAKLGTKFGTKCAAKFIGGELTGMAVSEAISGLFSNPVDVTTGQKILLPETDFTLPGRLPVTCSRFYASHLETVGLLGRGWRLNWETSLREDDEHITLTGVQGRELRYPKTMLTPGHQIFDPKEQLYLSRLHDGRYVLHYTDRSYYVFGDFDSDGMAYLLFMETPHRQRIVFGHEGGRLVRIASSSGHHLLLHRTQTPAGERLSRIELVQG…
A0A3U8GKP8_SALET	RHS repeat protein (Type IV secretion protein Rhs)	D5P16_23960 DK676_09275 DQJ59_21455 DSG68_11870 EBO67_11010	Salmonella enterica I	1362	MYEAARVDDPIYHTSALAGFLIGAIIGIAIIALAAFAFFSCGFLAGLILGFMADQIASGVLQLGEAIGRSIHHTAGKILTGSENVSTNSRPAARAVLSTVKCDNHIAEKRIAQGSENIYINSQPAARKDDHTECDAVIEDGSPNVFLGGGTQTVLEISSEIPDWLRKVVDVLFVVASLLGGLAGAWRQAAKLGTKFGTKCAAKFIGGELTGMAVSEAISGLFSNPVDVTTGQKILLPETDFTLPGRLPVTCSRFYASHLETVGLLGRGWRLNWETSLRDDDEHITLTGVQGRELRYPKTMLTPGHQIFDPEEQLYLSRLHDGRYVLHYTDRSYYVFGDFDSDGMAYLLFMETPHRQRIVFGHEGGRLVRIASSSGHHLLLHRTQTPAGERLSRIELVQG…
A0A3V4NER9_SALER	RHS repeat protein	A7K84_08430 BCA42_13100 BSU09_04160 D6I50_22045 DS762_08175 DWG36_14315 EA128_18725 EAD22_11550	Salmonella enterica (Salmonella choleraesuis)	1362	MYEAARVDDPIYHTSALAGFLIGAIIGIAIIALAAFAFFSCGFLAGLILGFMADQIASGVLQLGEAIGRSIHHTAGKILTGSENVSTNSRPAARAVLSTVKCDNHIAEKRIAQGSENIYINSQPAARKDDHTECDAVIEDGSPNVFLGGGTQTVLEISSEIPDWLRKVVDVLFVVASLLGGLAGAWRQAAKLGTKFGTKCAAKFIGGELVGMAVGEAISGLFSNPVDVTTGQKILLPETDFTLPGRLPVICSRFYASHLETVGLLGRGWRLNWETSLREDDEHITLTGVQGRELRYPKTMLTPGHQIFDPEEQLYLSRLHDGRYVLHYTDRSYYVFGDFDSDGMAYLLFMETPHRQRIVFGHEGGRLVRIASSSGHHLLLHRTQTPAGERLSRIELVQG…
A0A3Y7ALH0_SALET	RHS repeat protein	DUP74_14880	Salmonella enterica I	1362	MYEAARVDDPIYHTSALAGFLIGAIIGIAIIALAAFAFFSCGFLAGLILGFMADQIASGVLQLGEAIGRSIHHTAGKILTGSENVSTNSRPAARAVLSTVKCDNHIAEKRIAQGSENIYINSQPAARKDDHTECDAVIEDGSPNVFLGGGTQTVLEISSEIPDWLRKVVDVLFVVASLLGGLAGAWRQAAKLGTKFGTKCAAKFIGGELVGMAVGEAISGLFSNPVDVTTGQKILLPETDFTLPGRLPVICSRFYASHLETVGLLGRGWRLNWETSLREDDEHITLTGVQGRELRYPKTMLTPGHQIFDPEEQLYLSRLHDGRYVLHYTDRSYYVFGDFDSDGMAYLLFMETPHRQRIVFGHEGGRLVRIASSSGHHLLLHRTQTPAGERLSRIELVQG…
A0A3V9QCL1_SALET	RHS repeat protein	AHW89_22195	Salmonella enterica I	1362	MYEAARVDDPIYHTSALAGFLIGAIIGIAIIALAAFAFFSCGFLAGLILGFMADQIASGVLQLGEAIGRSIHHTAGKILTGSENVSTNSRPAARAVLSTVKCDNHIAEKRIAQGSENIYINSQPAARKDDHTECDAVIEDGSPNVFLGGGTQTVLEISSEIPDWLRKVVDVLFVVASLLGGLAGAWRQAAKLGTKFGTKCAAKFIGGELVGMAVGEAISGLFSNPVDVTTGQKILLPETDFTLPGRLPVTCSRFYASHLETVGLLGRGWRLNWETSLREDDEHITLTGVQGRELRYPKTMLTPGHQIFDPEEQLYLSRLHDGRYVLHYTDRSYYVFGDFDSDGMAYLLFMETPHRQRIVFGHEGGRLVRIASSSGHHLLLHRTQTPAGERLSRIELVQG…
A0A3V6BQ71_SALTH	RHS repeat protein	AA556_22565 FKO09_17935	Salmonella thompson	1362	MYEAARVDDPIYHTSALAGFLIGAIIGIAIIALAAFAFFSCGFLAGLILGFMADQIASGVLQLGEAIGRSIHHTAGKILTGSENVSTNSRPAARAVLSTVKCDNHIAEKRIAQGSENIYINSQPAARKDDHTECDAVIEDGSPNVFLGGGTQTVLEISSEIPDWLRKVVDVLFVVASLLGGLAGAWRQAAKLGTKFGTKCAAKFIGGELTGMAVSEAISGLFSNPVDVTTGQKILLPETDFTLPGRLPVTCSRFYASHLETVGLLGRGWRLNWETSLREDDEHITLTGVQGRELRYPKTMLTPGHQIFDPKEQLYLSRLHDGRYVLHYTDRSYYVFGDFDSDGMAYLLFMETPHRQRIVFGHEGGRLVRIASSSGHHLLLHRTQTPAGERLSRIELVQG…
A0A3X7ZVE0_SALER	RHS repeat protein	D8Q34_22020	Salmonella enterica (Salmonella choleraesuis)	1362	MYEAARVDDPIYHTSALAGFLIGAIIGIAIIALAAFAFFSCGFLAGLILGFMADQIASGVLQLGEAIGRSIHHTAGKILTGSENVSTNSRPAARAVLSTVKCDNHIAEKRIAQGSENIYINSQPAARKDDHTECDAVIEDGSPNVFLGGGTQTVLEISSEIPDWLRKVVDVLFVVASLLGGLAGAWRQAAKLGTKFGTKCAAKFIGGELTGMAVSEAISGLFSNPVDVTTGQKILLPETDFTLPGRLPVTCSRFYASHLETVGLLGRGWRLNWETSLREDDEHITLTGVQGRELRYPKTMLTPGHQIFDPKEQLYLSRLHDGRYVLHYTDRSYYVFGDFDSDGMAYLLFMETPHRQRIVFGHEGGRLVRIASSSGHHLLLHRTQTPAGERLSRIELVQG…
A0A3V9K3Q4_SALET	RHS repeat protein	AH254_08650 AHT22_11165 AXM38_20755 D4Z29_17745 DQJ63_18775 DRA23_16270 DU203_19830 DUA93_16905 DUV72_17270	Salmonella enterica I	1362	MYEAARVDDPIYHTSALAGFLIGAIIGIAIIALAAFAFFSCGFLAGLILGFMADQIASGVLQLGEAIGRSIHHTAGKILTGSENVSTNSRPAARAVLSTVKCDNHIAEKRIAQGSENIYINSQPAARKDDHTECDAVIEDGSPNVFLGGGTQTVLEISSEIPDWLRKVVDVLFVVASLLGGLAGAWRQAAKLGTKFGTKCAAKFIGGELVGMAVGEAISGLFSNPVDVTTGQKILLPETDFTLPGRLPVICSRFYASHLETVGLLGRGWRLNWETSLREDDEHITLTGVQGRELRYPKTMLTPGHQIFDPEEQLYLSRLHDGRYVLHYTDRSYYVFGDFDSDGMAYLLFMETPHRQRIVFGHEGGRLVRIASSSGHHLLLHRTQTPAGERLSRIELVQG…
A0A3V9HGG6_SALET	RHS repeat protein	Y847_08285	Salmonella enterica I	1362	MYEAARVDDPIYHTSALAGFLIGAIIGIAIIALAAFAFFSCGFLAGLILGFMADQIASGVLQLGEAIGRSIHHTAGKILTGSENVSTNSRPAARAVLSTVKCDNHIAEKRIAQGSENIYINSQPAARKDDHTECDAVIEDGSPNVFLGGGTQTVLEISSEIPDWLRKVVDVLFVVASLLGGLAGAWRQAAKLGTKFGTKCAAKFIGGELVGMAVGEAISGLFSNPVDVTTGQKILLPETDFTLPGRLPVTCSRFYASHLETVGLLGRGWRLNWETSLREDDEHITLTGVQGRELRYPKTMLTPGHQIFDPKEQLYLSRLHDGRYVLHYTDRSYYVFGDFDSDGMAYLLFMETPHRQRIVFGHEGGRLVRIASSSGHHLLLHRTQTPAGERLSRIELVQG…
A0A3V7SXU4_SALET	RHS repeat protein (Type IV secretion protein Rhs)	AF673_16825 DKT81_24490 DOH29_22655 E3C89_23055 E3N91_07920 EUR66_23035 EWB23_23365 FKX48_22830 FMB83_22300 FXS76_20930	Salmonella enterica subsp. enterica serovar Braenderup	1362	MYEAARVDDPIYHTSALAGFLIGAIIGIAIIALAAFAFFSCGFLAGLILGFMADQIASGVLQLGEAIGRSIHHTAGKILTGSENVSTNSRPAARAVLSTVKCDNHIAEKRIAQGSENIYINSQPAARKDDHTECDAVIEDGSPNVFLGGGTQTVLEISSEIPDWLRKVVDVLFVVASLLGGLAGAWRQAAKLGTKFGTKCAAKFIGGELTGMAVSEAISGLFSNPVDVTTGQKILLPETDFTLPGRLPVTCSRFYASHLETVGLLGRGWRLNWETSLRDDDEHITLTGVQGRELRYPKTMLTPGHQIFDPEEQLYLSRLHDGRYVLHYTDRSYYVFGDFDSDGMAYLLFMETPHRQRIVFGHEGGRLVRIASSSGHHLLLHRTQTPAGERLSRIELVQG…
A0A3V7I8T9_SALET	RHS repeat protein	CSR62_08175 DPB56_17255 DQD48_18470	Salmonella enterica subsp. enterica serovar Weltevreden	1362	MYEAARVDDPIYHTSALAGFLIGAIIGIAIIALAAFAFFSCGFLAGLILGFMADQIASGVLQLGEAIGRSIHHTAGKILTGSENVSTNSRPAARAVLSTVKCDNHIAEKRIAQGSENIYINSQPAARKDDHTECDAVIEDGSPNVFLGGGTQTVLEISSEIPDWLRKVVDVLFVVASLLGGLAGAWRQAAKLGTKFGTKCAAKFIGGELVGMAVGEAISGLFSNPVDVTTGQKILLPETDFTLPGRLPVICSRFYASHLETVGLLGRGWRLNWETSLREDDEHITLTGVQGRELRYPKTMLTPGHQIFDPEEQLYLSRLHDGRYVLHYTDRSYYVFGDFDSDGMAYLLFMETPHRQRIVFGHEGGRLVRIASSSGHHLLLHRTQTPAGERLSRIELVQG…
A0A3Z1QVQ6_SALET	RHS repeat protein	D4Z49_24590 DOH60_25180 DQJ23_24475 DUQ64_01565	Salmonella enterica I	1362	MYEAARVDDPIYHTSALAGFLIGAIIGIAIIALAAFAFFSCGFLAGLILGFMADQIASGVLQLGEAIGRSIHHTAGKILTGSENVSTNSRPAARAVLSTVKCDNHIAEKRIAQGSENIYINSQPAARKDDHTECDAVIEDGSPNVFLGGGTQTVLEISSEIPDWLRKVVDVLFVVASLLGGLAGAWRQAAKLGTKFGTKCAAKFIGGELVGMAVGEAISGLFSNPVDVTTGQKILLPETDFTLPGRLPVTCSRFYASHLETVGLLGRGWRLNWETSLRDDDEHITLTGVQGRELRYPKTMLTPGHQIFDPEEQLYLSRLHDGRYVLHYTDRSYYVFGDFDSDGMAYLLFMETPHCQRIVFGHEGGRLVRIASSSGHHLLLHRTQTPAGERLSRIELVQG…
A0A3X3J9R9_SALER	RHS repeat protein	D8N55_21505	Salmonella enterica (Salmonella choleraesuis)	1364	MYEAARVDDPIYHTSALAGFLIGAIIGIAIIALAAFAFFSCGFLAGLILGFMADQIASGVLQLGEAIGRSIHHTAGKILTGSENVSTNSRPAARAVLSTVKCDNHIAEKRIAQGSENIYINSQPAARKDDHTECDAVIEDGSPNVFLGGGTQTVLEISSEIPDWLRKVVDVLFVVASLLGGLAGAWRQAAKLGTKFGTKCAAKFIGGELVGMAVGEAISGLFSNPVDVTTGQKILLPETDFTLPGRLPVTCSRFYASHLETVGLLGRGWRLNWETSLRDDDEHITLTGVQGRELRYPKTMLTPGHQIFDPEEQLYLSRLHDGRYVLHYTDRSYYVFGDFDSDGMAYLLFMETPHRQRIVFGHEGGRLVRIASSSGHHLLLHRTQTPAGERLSRIELVQG…
A0A3T6LY73_SALET	RHS repeat protein (Type IV secretion protein Rhs)	D5881_19385 DL115_16425 DQD11_21860	Salmonella enterica I	1364	MYEAARVDDPIYHTSALAGFLIGAIIGIAIIALAAFAFFSCGFLAGLILGFMADQIASGVLQLGEAIGRSIHHTAGKILTGSENVSTNSRPAARAVLSTVKCDNHIAEKRIAQGSENIYINSQPAARKDDHTECDAVIEDGSPNVFLGGGTQTVLEISSEIPDWLRKVVDVLFVVASLLGGLAGAWRQAAKLGTKFGTKCAAKFIGGELVGMAVGEAISGLFSNPVDVTTGQKILLPETDFTLPGRLPVTCSRFYASHLETVGLLGRGWRLNWETSLRDDDEHITLTGVQGRELRYPKTMLTPGHQIFDPEEQLYLSRLHDGRYVLHYTDRSYYVFGDFDSDGMAYLLFMETPHRQRIVFGHEGGRLVRIASSSGHHLLLHRTQTPAGERLSRIELVQG…
A0A3Z6A5E3_SALET	RHS repeat protein	D7N30_18885	Salmonella enterica I	1364	MYEAARVDDPIYHTSALAGFLIGAIIGIAIIALAAFAFFSCGFLAGLILGFMADQIASGVLQLGEAIGRSIHHTAGKILTGSENVSTNSRPAARAVLSTVKCDNHIAEKRIAQGAENIYINSQPAARKDDHTECDAVIEDGSPNVFLGGGTQTVLEISSEIPDWLRKVVDVLFVVASLLGGLAGAWRQAAKLGTKFGTKCAAKFIGGELVGMAVGEAISGLFSNPVDVTTGQKILLPETDFTLPGRLPVTCSRFYASHLETVGLLGRGWRLNWETSLRDDDEHITLTGVQGRELRYPKTMLTPGHQIFDPEEQLYLSRLHDGRYVLHYTDRSYYVFGDFDSDGMAYLLFMETPHRQRIVFGHEGGRLVRIASSSGHHLLLHRTQTPAGERLSRIELVQG…
A0A564XS55_SALTM	Type IV secretion protein Rhs	wapA SAMEA4398682_03735	Salmonella typhimurium	1364	MYEAARVDDPIYHTSALAGFLIGAIIGIAIIALAAFAFFSCGFLAGLILGFMADQIASGVLQLGEAIGRSIHHTAGKILTGSENVSTNSRPAARAVLSTVKCDNHIAEKRIAQGSENIYINSQPAARKDDHTECDAVIEDGSPNVFLGGGTQTVLEISSEIPDWLRKVVDVLFVVASLLGGLAGAWRQAAKLGTKFGTKCAAKFIGGELVGMAVGEAISGLFSNPVDVTTGQKILLPETDFTLPGRLPVTCSRFYASHLETVGLLGRGWRLNWETSLRDDDEHITLTGVQGRELRYPKTMLTPGHQIFDPEEQLYLSRLHDGRYVLHYTDRSYYVFGDFDSDGMAYLLFMETPHRQRIVFGHEGGRLVRIASSSGHHLLLHRTQTPAGERLSRIELVQG…
A0A0J5DMN0_SALTM	RHS repeat protein (Type IV secretion protein Rhs)	AF489_09030 AXU58_22405 CD48_15975 CE87_15855 CVR97_23500 D7F20_20560 D7H43_22010 DD95_17765 DJ388_06980 DKJ11_16895 DKU57_21065 DO698_18005 GW08_07920 NG18_21445 NU83_12010 QA89_16350 QB40_20680 QD15_18130 Y934_23050 YG50_17245 YR17_13655	Salmonella typhimurium	1364	MYEAARVDDPIYHTSALAGFLIGAIIGIAIIALAAFAFFSCGFLAGLILGFMADQIASGVLQLGEAIGRSIHHTAGKILTGSENVSTNSRPAARAVLSTVKCDNHIAEKRIAQGSENIYINSQPAARKDDHTECDAVIEDGSPNVFLGGGTQTVLEISSEIPDWLRKVVDVLFVVASLLGGLAGAWRQAAKLGTKFGTKCAAKFIGGELVGMAVGEAISGLFSNPVDVTTGQKILLPETDFTLPGRLPVTCSRFYASHLETVGLLGRGWRLNWETSLRDDDEHITLTGVQGRELRYPKTMLTPGHQIFDPEEQLYLSRLHDGRYVLHYTDRSYYVFGDFDSDGMAYLLFMETPHRQRIVFGHEGGRLVRIASSSGHHLLLHRTQTPAGERLSRIELVQG…
A0A2T8QLH5_SALET	Type IV secretion protein Rhs	C4866_25450	Salmonella enterica subsp. enterica serovar 4,12:i:-	1364	MYEAARVDDPIYHTSALAGFLIGAIIGIAIIALAAFAFFSCGFLAGLILGFMADQIASGVLQLGEAIGRSIHHTAGKILTGSENVSTNSRPAARAVLSTVKCDNHIAEKRIAQGSENIYINSQPAARKDDHTECDAVIEDGSPNVFLGGGTQTVLEISSEIPDWLRKVVDVLFVVASLLGGLAGAWRQAAKLGTKFGTKCAAKFIGGELVGMAVGEAISGLFSNPVDVTTGQKILLPETDFTLPGRLPVTCSRFYASHLETVGLLGRGWRLNWETSLRDDDEHITLTGVQGRELRYPKTMLTPGHQIFDPEEQLYLSRLHDGRYVLHYTDRSYYVFGDFDSDGMAYLLFMETPHRQRIVFGHEGGRLVRIASSSGHHLLLHRTQTPAGERLSRIELVQG…
A0A3V9J0N8_SALTM	RHS repeat protein	LZ63_13200	Salmonella typhimurium	1364	MYEAARVDDPIYHTSALAGFLIGAIIGIAIIALAAFAFFSCGFLAGLILGFMADQIASGVLQLGEAIGRSIHHTAGKILTGSENVSTNSRPAARAVLSTVKCDNHIAEKRIAQGSENIYINSQPAARKDDHTECDAVIEDGSPNVFLGGGTQTVLEISSEIPDWLRKVVDVLFVVASLLGGLAGAWRQAAKLGTKFGTKCAAKFIGGELVGMAVGEAISGLFSNPVDVTTGQKILLPETDFTLPGRLPVTCSRFYASHLETVGLLGRGWRLNWETSLRDDDEHITLTGVQGRELRYPKTMLTPGHQIFDPEEQLYLSRLHDGRYVLHYTDRSYYVFGDFDSDGMAYLLFMETPHRQRIVFGHEGGRLVRIASSSGHHLLLHRTQTPAGERLSRIELVQG…
A0A3Y1P3G0_SALET	RHS repeat protein	D5X20_19490 D6S02_16285 D9P12_20470 DNU84_20595 DO591_18290 DP698_21270 DP736_19425 DPY81_20540 DU947_17590 EBJ89_08025	Salmonella enterica I	1364	MYEAARVDDPIYHTSALAGFLIGAIIGIAIIALAAFAFFSCGFLAGLILGFMADQIASGVLQLGEAIGRSIHHTAGKILTGSENVSTNSRPAARAVLSTVKCDNHIAEKRIAQGSENIYINSQPAARKDDHTECDAVIEDGSPNVFLGGGTQTVLEISSEIPDWLRKVVDVLFVVASLLGGLAGAWRQAAKLGTKFGTKCAAKFIGGELVGMAVGEAISGLFSNPVDVTTGQKILLPETDFTLPGRLPVTCSRFYASHLETVGLLGRGWRLNWETSLRDDDEHITLTGVQGRELRYPKTMLTPGHQIFDPEEQLYLSRLHDGRYVLHYTDRSYYVFGDFDSDGMAYLLFMETPHRQRIVFGHEGGRLVRIASSSGHHLLLHRTQTPAGERLSRIELVQG…
A0A3X6NMG3_SALER	RHS repeat protein	D8U57_23165 EIU76_23165	Salmonella enterica (Salmonella choleraesuis)	1364	MYEAARVDDPIYHTSALAGFLIGAIIGIAIIALAAFAFFSCGFLAGLILGFMADQIASGVLQLGEAIGRSIHHTAGKILTGSENVSTNSRPAARAVLSTVKCDNHIAEKRIAQGSENIYINSQPAARKDDHTECDAVIEDGSPNVFLGGGTQTVLEISSEIPDWLRKVVDVLFVVASLLGGLAGAWRQAAKLGTKFGTKCAAKFIGGELVGMAVGEAISGLFSNPVDVTTGQKILLPETDFTLPGRLPVTCSRFYASHLETVGLLGRGWRLNWETSLRDDDEHITLTGVQGRELRYPKTMLTPGHQIFDPEEQLYLSRLHDGRYVLHYTDRSYYVFGDFDSDGMAYLLFMETPHRQRIVFGHEGGRLVRIASSSGHHLLLHRTQTPAGERLSRIELVQG…
A0A3W1V5F9_SALER	RHS repeat protein	D7T23_24075	Salmonella enterica (Salmonella choleraesuis)	1364	MYEAARVDDPIYHTSALAGFLIGAIIGIAIIALAAFAFFSCGFLAGLILGFMADQIASGVLQLGEAIGRSIHHTAGKILTGSENVSTNSRPAARAVLSTVKCDNHIAEKRIAQGSENIYINSQPAARKDDHTECDAVIEDGSPNVFLGGGTQTVLEISSEIPDWLRKVVDVLFVVASLLGGLAGAWRQAAKLGTKFGTKCAAKFIGGELVGMAVGEAISGLFSNPVDVTTGQKILLPETDFTLPGRLPVTCSRFYASHLETVGLLGRGWRLNWETSLRDDDEHITLTGVQGRELRYPKTMLTPGHQIFDPEEQLYLSRLHDGRYVLHYTDRSYYVFGDFDSDGMAYLLFMETPHRQRIVFGHEGGRLVRIASSSGHHLLLHRTQTPAGERLSRIELVQG…
A0A3T6X4W2_SALET	RHS repeat protein (Type IV secretion protein Rhs)	ACK40_20195 CC394_21370 CC828_20755 CQF73_21520 CQH69_19520 CQM91_20495 D4408_17700 D4427_13155 D4507_19960 D4515_20265 D4E75_21830 D4F20_19840 D4F54_17140 D4G50_09505 D4Y42_19785 D4Y96_16440 D5Y08_09770 D6R58_22710 D6T18_22795 D7N52_20360 D8S66_22325 D9P51_19705 DKT04_19850 DKV20_21615 DL110_19995 DL130_23660 DL146_24600 DL163_20425 DLB18_22325 DLC24_10030 DLF29_10450 DLF33_22100 DLM26_17805 DLQ…	Salmonella enterica I	1364	MYEAARVDDPIYHTSALAGFLIGAIIGIAIIALAAFAFFSCGFLAGLILGFMADQIASGVLQLGEAIGRSIHHTAGKILTGSENVSTNSRPAARAVLSTVKCDNHIAEKRIAQGSENIYINSQPAARKDDHTECDAVIEDGSPNVFLGGGTQTVLEISSEIPDWLRKVVDVLFVVASLLGGLAGAWRQAAKLGTKFGTKCAAKFIGGELVGMAVGEAISGLFSNPVDVTTGQKILLPETDFTLPGRLPVTCSRFYASHLETVGLLGRGWRLNWETSLRDDDEHITLTGVQGRELRYPKTMLTPGHQIFDPEEQLYLSRLHDGRYVLHYTDRSYYVFGDFDSDGMAYLLFMETPHRQRIVFGHEGGRLVRIASSSGHHLLLHRTQTPAGERLSRIELVQG…
A0A3Z0QYK3_SALET	RHS repeat protein	D6S82_21220	Salmonella enterica I	1364	MYEAARVDDPIYHTSALAGFLIGAIIGIAIIALAAFAFFSCGFLAGLILGFMADQIASGVLQLGEAIGRSIHHTAGKILTGSENVSTNSRPAARAVLSTVKCDNHIAEKRIAQGSENIYINSQPAARKDDHTECDAVIEDGSPNVFLGGGTQTVLEISSEIPDWLRKVVDVLFVVASLLGGLAGAWRQAAKLGTKFGTKCAAKFIGGELVGMAVGEAISGLFSNPVDVTTGQKILLPETDFTLPGRLPVTCSRFYASHLETVGLLGRGWRLNWETSLRDDDEHITLTGVQGRELRYPKTMLTPGHQIFDPEEQLYLSRLHDGRYVLHYTDRSYYVFGDFDSDGMAYLLFMETPHRQRIVFGHEGGRLVRIASSSGHHLLLHRTQTPAGERLSRIELVQG…
A0A3V8MSX4_SALTM	RHS repeat protein	CAI81_22115	Salmonella enterica subsp. enterica serovar Typhimurium str. CFSAN000648	1364	MYEAARVDDPIYHTSALAGFLIGAIIGIAIIALAAFAFFSCGFLAGLILGFMADQIASGVLQLGEAIGRSIHHTAGKILTGSENVSTNSRPAARAVLSTVKCDNHIAEKRIAQGSENIYINSQPAARKDDHTECDAVIEDGSPNVFLGGGTQTVLEISSEIPDWLRKVVDVLFVVASLLGGLAGAWRQAAKLGTKFGTKCAAKFIGGELVGMAVGEAISGLFSNPVDVTTGQKILLPETDFTLPGRLPVTCSRFYASHLETVGLLGRGWRLNWETSLRDDDEHITLTGVQGRELRYPKTMLTPGHQIFDPEEQLYLSRLHDGRYVLHYTDRSYYVFGDFDSDGMAYLLFMETPHRQRIVFGHEGGRLVRIASSSGHHLLLHRTQTPAGERLSRIELVQG…
A0A0F6AX94_SALT1	Putative RHS-like protein	STM14_0340	Salmonella typhimurium (strain 14028s / SGSC 2262)	1364	MYEAARVDDPIYHTSALAGFLIGAIIGIAIIALAAFAFFSCGFLAGLILGFMADQIASGVLQLGEAIGRSIHHTAGKILTGSENVSTNSRPAARAVLSTVKCDNHIAEKRIAQGSENIYINSQPAARKDDHTECDAVIEDGSPNVFLGGGTQTVLEISSEIPDWLRKVVDVLFVVASLLGGLAGAWRQAAKLGTKFGTKCAAKFIGGELVGMAVGEAISGLFSNPVDVTTGQKILLPETDFTLPGRLPVTCSRFYASHLETVGLLGRGWRLNWETSLRDDDEHITLTGVQGRELRYPKTMLTPGHQIFDPEEQLYLSRLHDGRYVLHYTDRSYYVFGDFDSDGMAYLLFMETPHRQRIVFGHEGGRLVRIASSSGHHLLLHRTQTPAGERLSRIELVQG…
A0A0W3N7H1_SALER	RHS repeat protein (Type IV secretion protein Rhs)	AL463_02800 D6N55_22450	Salmonella enterica (Salmonella choleraesuis)	1364	MYEAARVDDPIYHTSALAGFLIGAIIGIAIIALAAFAFFSCGFLAGLILGFMADQIASGVLQLGEAIGRSIHHTAGKILTGSENVSTNSRPAARAVLSTVKCDNHIAEKRIAQGSENIYINSQPAARKDDHTECDAVIEDGSPNVFLGGGTQTVLEISSEIPDWLRKVVDVLFVVASLLGGLAGAWRQAAKLGTKFGTKCAAKFIGGELVGMAVGEAISGLFSNPVDVTTGQKILLPETDFTLPGRLPVTCSRFYASHLETVGLLGRGWRLNWETSLRDDDEHITLTGVQGRELRYPKTMLTPGHQIFDPEEQLYLSRLHDGRYVLHYTDRSYYVFGDFDSDGMAYLLFMETPHRQRIVFGHEGGRLVRIASSSGHHLLLHRTQTPAGERLSRIELVQG…
A0A3V2ZGU8_SALET	RHS repeat protein	NJ03_13505	Salmonella enterica subsp. enterica serovar Heidelberg	1364	MYEAARVDDPIYHTSALAGFLIGAIIGIAIIALAAFAFFSCGFLAGLILGFMADQIASGVLQLGEAIGRSIHHTAGKILTGSENVSTNSRPAARAVLSTVKCDNHIAEKRIAQGSENIYINSQPAARKDDHTECDAVIEDGSPNVFLGGGTQTVLEISSEIPDWLRKVVDVLFVVASLLGGLAGAWRQAAKLGTKFGTKCAAKFIGGELVGMAVGEAISGLFSNPVDVTTGQKILLPETDFTLPGRLPVTCSRFYASHLETVGLLGRGWRLNWETSLRDDDEHITLTGVQGRELRYPKTMLTPGHQIFDPEEQLYLSRLHDGRYVLHYTDRSYYVFGDFDSDGMAYLLFMETPHRQRIVFGHEGGRLVRIASSSGHHLLLHRTQTPAGERLSRIELVQG…
Q8ZRL0_SALTY	Putative RHS-family protein	STM0291	Salmonella typhimurium (strain LT2 / SGSC1412 / ATCC 700720)	1364	MYEAARVDDPIYHTSALAGFLIGAIIGIAIIALAAFAFFSCGFLAGLILGFMADQIASGVLQLGEAIGRSIHHTAGKILTGSENVSTNSRPAARAVLSTVKCDNHIAEKRIAQGSENIYINSQPAARKDDHTECDAVIEDGSPNVFLGGGTQTVLEISSEIPDWLRKVVDVLFVVASLLGGLAGAWRQAAKLGTKFGTKCAAKFIGGELVGMAVGEAISGLFSNPVDVTTGQKILLPETDFTLPGRLPVTCSRFYASHLETVGLLGRGWRLNWETSLRDDDEHITLTGVQGRELRYPKTMLTPGHQIFDPEEQLYLSRLHDGRYVLHYTDRSYYVFGDFDSDGMAYLLFMETPHRQRIVFGHEGGRLVRIASSSGHHLLLHRTQTPAGERLSRIELVQG…
A0A3U7Y4N9_SALET	RHS repeat protein	DQE20_14945	Salmonella enterica I	1364	MYEAARVDDPIYHTSALAGFLIGAIIGIAIIALAAFAFFSCGFLAGLILGFMADQIASGVLQLGEAIGRSIHHTAGKILTGSENVSTNSRPAARAVLSTVKCDNHIAEKRIAQGSENIYINSQPAARKDDHTECDAVIEDGSPNVFLGGGTQTVLEISSEIPDWLRKVVDVLFVVASLLGGLAGAWRQAAKLGTKFGTKCAAKFIGGELVGMAVGEAISGLFSNPVDVTTGQKILLPETDFTLPGRLPVTCSRFYASHLETVGLLGRGWRLNWETSLRDDDEHITLTGVQGRELRYPKTMLTPGHQIFDPEEQLYLSRLHDGRYVLHYTDRSYYVFGDFDSDGMAYLLFMETPHRQRIVFGHEGGRLVRIASSSGHHLLLHRTQTPAGERLSRIELVQG…
A0A3V2I7X2_SALSE	RHS repeat protein	NL78_24330	Salmonella senftenberg	1364	MYEAARVDDPIYHTSALAGFLIGAIIGIAIIALAAFAFFSCGFLAGLILGFMADQIASGVLQLGEAIGRSNHHTAGKILTGSENVSTNSRPAARAVLSTVKCDNHIAEKRIAQGSENIYINSQPAARKDDHTECDAVIEDGSPNVFLGGGTQTVLEISSEIPDWLRKVVDVLFVVASLLGGLAGAWRQAAKLGTKFGTKCAAKFIGGELVGMAVGEAISGLFSNPVDVTTGQKILLPETDFTLPGRLPVTCSRFYASHLETVGLLGRGWRLNWETSLREDDEHITLTGVQGRELRYPKTMLTPGHQIFDPEEQLYLSRLHDGRYVLHYTDRSYYVFGDFDSDGMAYLLFMETPHRQRIVFGHEGGRLVRIASSSGHHLLLHRTQTPAGERLSRIELVQG…
A0A4V1IDA0_SALET	RHS repeat protein	FGF59_01480	Salmonella enterica subsp. enterica serovar 1,4,[5],12:i:-	1364	MYEAARVDDPIYHTSALAGFLIGAIIGIAIIALAAFAFFSCGFLAGLILGFMADQIASGVLQLGEAIGRSIHHTAGKILTGSENVSTNSRPAARAVLSTVKCDNHIAEKRIAQGSENIYINSQPAARKDDHTECDAVIEDGSPNVFLGGGTQTVLEISSEIPDWLRKVVDVLFVVASLLGGLAGAWRQAAKLGTKFGTKCAAKFIGGELVGMAVGEAISGLFSNPVDVTTGQKILLPETDFTLPGRLPVTCSRFYASHLETVGLLGRGWRLNWETSLRDDDEHITLTGVQGRELRYPKTMLTPGHQIFDPEEQLYLSRLHDGRYVLHYTDRSYYVFGDFDSDGMAYLLFMETPHRQRIVFGHEGGRLVRIASSSGHHLLLHRTQTPAGERLSRIELVQG…
A0A3Y9BDQ5_SALET	RHS repeat protein	D4392_24425	Salmonella enterica I	1364	MYEAARVDDPIYHTSALAGFLIGAIIGIAIIALAAFAFFSCGFLAGLILGFMADQIASGVLQLGEAIGRSIHHTAGKILTGSENVSTNSRPAARAVLSTVKCDNHIAEKRIAQGSENIYINSQPAARKDDHTECDAVIEDGSPNVFLGGGTQTVLEISSEIPDWLRKVVDVLFVVASLLGGLAGAWRQAAKLGTKFGTKCAAKFIGGELVGMAVGEAISGLFSNPVDVTTGQKILLPETDFTLPGRLPVTCSRFYASHLETVGLLGRGWRLNWETSLRDDDEHITLTGVQGRELRYPKTMLTPGHQIFDPEEQLYLSRLHDGRYVLHYTDRSYYVFGDFDSDGMAYLLFMETPHRQRIVFGHEGGRLVRIASSSGHHLLLHRTQTPAGERLSRIELVQG…
A0A3V5ZYT0_SALTM	RHS repeat protein	JO10_08620	Salmonella typhimurium	1364	MYEAARVDDPIYHTSALAGFLIGAIIGIAIIALAAFAFFSCGFLAGLILGFMADQIASGVLQLGEAIGRSIHHTAGKILTGSENVSTNSRPAARAVLSTVKCDNHIAEKRIAQGSENIYINSQPAARKDDHTECDAVIEDGSPNVFLGGGTQTVLEISSEIPDWLRKVVDVLFVVASLLGGLAGAWRQAAKLGTKFGTKCAAKFIGGELVGMAVGEAISGLFSNPVDVTTGQKILLPETDFTLPGRLPVTCSRFYASHLETVGLLGRGWRLNWETSLRDDDEHITLTGVQGRELRYPKTMLTPGHQIFDPEEQLYLSRLHDGRYVLHYTDRSYYVFGDFDSDGMAYLLFMETPHRQRIVFGHEGGRLVRIASSSGHHLLLHRTQTPAGERLSRIELVQG…
A0A315GME1_SALET	RHS repeat protein (Type IV secretion protein Rhs)	rhs AOL22_01475 DVH39_15500 DVH40_22170 DVH41_24430 DVH48_24505 STL3838_36330 STL3841_35160	Salmonella enterica subsp. enterica serovar 4,[5],12:i:-	1364	MYEAARVDDPIYHTSALAGFLIGAIIGIAIIALAAFAFFSCGFLAGLILGFMADQIASGVLQLGEAIGRSIHHTAGKILTGSENVSTNSRPAARAVLSTVKCDNHIAEKRIAQGSENIYINSQPAARKDDHTECDAVIEDGSPNVFLGGGTQTVLEISSEIPDWLRKVVDVLFVVASLLGGLAGAWRQAAKLGTKFGTKCAAKFIGGELVGMAVGEAISGLFSNPVDVTTGQKILLPETDFTLPGRLPVTCSRFYASHLETVGLLGRGWRLNWETSLRDDDEHITLTGVQGRELRYPKTMLTPGHQIFDPEEQLYLSRLHDGRYVLHYTDRSYYVFGDFDSDGMAYLLFMETPHRQRIVFGHEGGRLVRIASSSGHHLLLHRTQTPAGERLSRIELVQG…
A0A3Y0W7X0_SALET	RHS repeat protein	B9C63_21390 D4F17_24615 EGM25_02335	Salmonella enterica I	1364	MYEAARVDDPIYHTSALAGFLIGAIIGIAIIALAAFAFFSCGFLAGLILGFMADQIASGVLQLGEAIGRSIHHTAGKILTGSENVSTNSRPAARAVLSTVKCDNHIAEKRIAQGSENIYINSQPAARKDDHTECDAVIEDGSPNVFLGGGTQTVLEISSEIPDWLRKVVDVLFVVASLLGGLAGAWRQAAKLGTKFGTKCAAKFIGGELVGMAVGEAISGLFSNPVDVTTGQKILLPETDFTLPGRLPVTCSRFYASHLETVGLLGRGWRLNWETSLRDDDEHITLTGVQGRELRYPKTMLTPGHQIFDPEEQLYLSRLHDGRYVLHYTDRSYYVFGDFDSDGMAYLLFMETPHRQRIVFGHEGGRLVRIASSSGHHLLLHRTQTPAGERLSRIELVQG…
A0A3Z7JKF6_SALTM	RHS repeat protein	AAP89_22535 EHB24_20615	Salmonella typhimurium	1364	MYEAARVDDPIYHTSALAGFLIGAIIGIAIIALAAFAFFSCGFLAGLILGFMADQIASGVLQLGEAIGRSIHHTAGKILTGSENVSTNSRPAARAVLSTVKCDNHIAEKRIAQGSENIYINSQPAARKDDHTECDAVIEDGSPNVFLGGGTQTVLEISSEIPDWLRKVVDVLFVVASLLGGLAGAWRQAAKLGTKFGTKCAAKFIGGELVGMAVGEAISGLFSNPVDVTTGQKILLPETDFTLPGRLPVTCSRFYASHLETVGLLGRGWRLNWETSLRDDDEHITLTGVQGRELRYPKTMLTPGHQIFDPEEQLYLSRLHDGRYVLHYTDRSYYVFGDFDSDGMAYLLFMETPHRQRIVFGHEGGRLVRIASSSGHHLLLHRTQTPAGERLSRIELVQG…
A0A3V5MKB3_SALER	RHS repeat protein	CBJ14_14810 CRQ37_16955	Salmonella enterica (Salmonella choleraesuis)	1365	MYEAARVDDPIYHTSALAGFLIGAIIGIAIIALAAFAFFSCGFLAGLILGFMADQIASGVLQLGEAIGRSIHHTAGKILTGSENVSTNSRPAARAVLSTVKCDNHIAEKRIAQGSENIYINSQPAARKDDHTECDAVIEDGSPNVFLGGGTQTVLEISSEIPDWLRKVVDVLFVVASLLGGLAGAWRQAAKLGTKFGTKCAAKFIGGELVGMAVGEAISGLFSNPVDVTTGQKILLPETDFTLPGRLPVTCSRFYASHQETVGLLGRGWRLNWETSLREDDEHITLTGVQGRELRYPKTMLTPGHQIFDPEEQLYLSRLHDGRYVLHYTDRSYYVFGDFDSDGMAYLLFMETPHRQRIVFGHEGGRLVRIASSSGHHLLLHRTQTPAGERLSRIELVQG…
A0A3V5R8B8_SALER	RHS repeat protein	AC380_05300	Salmonella enterica (Salmonella choleraesuis)	1365	MYEAARVDDPIYHTSALAGFLIGAIIGIAIIALAAFAFFSCGFLAGLILGFMADQIASGVLQLGEAIGRSIHHTAGKILTGSENVSTNSRPAARAVLSTVKCDNHIAEKRIAQGSENIYINSQPAARKDDHTECDAVIEDGSPNVFLGGGTQTVLEISSEIPDWLRKVVDVLFVVASLLGGLAGAWRQAAKLGTKFGTKCAAKFIGGELVGMAVGEAISGLFSNPVDVTTGQKILLPETDFTLPGRLPVTCSRFYASHQETVGLLGRGWRLNWETSLREDDEHITLTGVQGRELRYPKTMLTPGHQIFDPEEQLYLSRLHDGRYVLHYTDRSYYVFGDFDSDGMAYLLFMETPHRQRIVFGHEGGRLVRIASSSGHHLLLHRTQTPAGERLSRIELVQG…
A0A3Y2Z710_SALET	RHS repeat protein	DFQ85_06385	Salmonella enterica I	1365	MYEAARVDDPIYHTSALAGFLIGAIIGIAIIALAAFAFFSCGFLAGLILGFMADQIASGVLQLGEAIGRSIHHTAGKILTGSENVSTNSRPAARAVLSTVKCDNHIAEKRIAQGSENIYINSQPAARKDDHTECDAVIEDGSPNVFLGGGTQTVLEISSEIPDWLRKVVDVLFVVASLLGGLAGAWRQAAKLGTKFGTKCAAKFIGGELVGMAVGEAISGLFSNPVDVTTGQKILLPETDFTLPGRLPVTCSRFYASHQETVGLLGRGWRLNWETSLREDDEHITLTGVQGRELRYPKTMLTPGHQIFDPEEQLYLSRLHDGRYVLHYTDRSYYVFGDFDSDGMAYLLFMETPHRQRIVFGHEGGRLVRIASSSGHHLLLHRTQTPAGERLSRIELVQG…
A0A3Y7ZT34_SALET	RHS repeat protein	DS390_09835	Salmonella enterica I	1365	MYEAARVDDPIYHTSALAGFLIGAIIGIAIIALAAFAFFSCGFLAGLILGFMADQIASGVLQLGEAIGRSIHHTAGKILTGSENVSTNSRPAARAVLSTVKCDNHIAEKRIAQGSENIYINSQPAARKDDHTECDAVIEDGSPNVFLGGGTQTVLEISSEIPDWLRKVVDVLFVVASLLGGLAGAWRQAAKLGTKFGTKCAAKFIGGELVGMAVGEAISGLFSNPVDVTTGQKILLPETDFTLPGRLPVTCSRFYASHQETVGLLGRGWRLNWETSLREDDEHITLTGVQGRELRYPKTMLTPGHQIFDPEEQLYLSRLHDGRYVLHYTDRSYYVFGDFDSDGMAYLLFMETPHRQRIVFGHEGGRLVRIASSSGHHLLLHRTQTPAGERLSRIELVQG…
A0A3U3R757_SALET	RHS repeat protein	DOW88_11260	Salmonella enterica subsp. enterica serovar Give	1366	MYEAARVDDPIYHTSALAGFLIGAIIGIAIIALAAFAFFSCGFLAGLILGFMADQIASGVLQLGEAIGRSIHHTAGKILTGSENVSTNSRPAARAVLSTVKCDNHIAEKRIAQGSENIYINSQPAARKDDHTECDAVIEDGSPNVFLGGGTQTVLEISSEIPDWLRKVVDVLFVVASLLGGLAGAWRQAAKLGTKFGTKCAAKFIGGELAGMAVGEAISGLFSNPVDVTTGQKILLPETDFTLPGRLPVTCSRFYASHLETVGLLGRGWRLNWETSLREDDEHITLTGVQGRELCYPKTMLTPGHQIFDPKEQLYLSRLHDGRYVLHYTDRSYYVFGDFDSDGMAYLLFMETPHRQRIVFGHEGGRLVRIASSSGHHLLLHRTQTPAGERLSRIELVQG…
A0A3V7RCD2_SALER	RHS repeat protein	ASP70_12965	Salmonella enterica (Salmonella choleraesuis)	1366	MYEAARVDDPIYHTSALAGFLIGAIIGIAIIALAAFAFFSCGFLAGLILGFMADQIASGVLQLGEAIGRSIHHTAGKILTGSENVSTNSRPAARAVLSTVKCDNHIAEKRIAQGSENIYINSQPAARKDDHTECDAVIEDGSPNVFLGGGTQTVLEISSEIPDWLRKVVDVLFVVASLLGGLAGAWRQAAKLGTKFGTKCAAKFIGGELAGMAVGEAISGLFSNPVDVTTGQKILLPETDFTLPGRLPVTCSRFYASHLETVGLLGRGWRLNWETSLREDDEHITLTGVQGRELCYPKTMLTPGHQIFDPKEQLYLSRLHDGRYVLHYTDRSYYVFGDFDSDGMAYLLFMETPHRQRIVFGHEGGRLVRIASSSGHHLLLHRTQTPAGERLSRIELVQG…
A0A3V1W574_SALER	RHS repeat protein	AVW22_24230	Salmonella enterica (Salmonella choleraesuis)	1366	MYEAARVDDPIYHTSALAGFLIGAIIGIAIIALAAFAFFSCGFLAGLILGFMADQIASGVLQLGEAIGRSIHHTAGKILTGSENVSTNSRPAARAVLSTVKCDNHIAEKRIAQGSENIYINSQPAARKDDHTECDAVIEDGSPNVFLGGGTQTVLEISSEIPDWLRKVVDVLFVVASLLGGLAGAWRQAAKLGTKFGTKCAAKFIGGELTGMAVSEAISGLFSNPVDVTTGQKILLPETDFTLPGRLPVTCSRFYASHLETVGLLGRGWRLNWETSLREDDEHITLTGVQGRELRYPKTMLTPGHQIFDPKEQLYLSRLHDGRYVLHYTDRSYYVFGDFDSDGMAYLLFMETPHRQRIVFGHEGGRLVRIASSSGHHLLLHRTQTPAGERLSRIELVQG…
A0A3Y1C4A6_SALET	RHS repeat protein	D5X56_21245	Salmonella enterica I	1366	MYEAARVDDPIYHTSALAGFLIGAIIGIAIIALAAFAFFSCGFLAGLILGFMADQIASGVLQLGEAIGRSIHHTAGKILTGSENVSTNSRPAARAVLSTVKCDNHIAEKRIAQGSENIYINSQPAARKDDHTECDAVIEDGSPNVFLGGGTQTVLEISSEIPDWLRKVVDVLFVVASLLGGLAGAWRQAAKLGTKFGTKCAAKFIGGELAGMAVGEAISGLFSNPVDVTTGQKILLPETDFTLPGRLPVTCSRFYASHLETVGLLGRGWRLNWETSLREDDEHITLTGVQGRELCYPKTMLTPGHQIFDPEEQLYLSRLHDGRYVLHYTDRSYYVFGDFDSDGMAYLLFMETPHRQRIVFGHEGGRLVRIASSSGHHLLLHRTQTPAGERLSRIELVQG…
A0A3Z6VP40_SALET	RHS repeat protein	DTT89_22335	Salmonella enterica I	1366	MYEAARVDDPIYHTSALAGFLIGAIIGIAIIALAAFAFFSCGFLAGLILGFMADQIASGVLQLGEAIGRSIHHTAGKILTGSENVSTNSRPAARAVLSTVKCDNHIAEKRIAQGSENIYINSQPAARKDDHTECDAVIEDGSPNVFLGGGTQTVLEISSEIPDWLRKVVDVLFVVASLLGGLAGAWRQAAKLGTKFGTKCAAKFIGGELAGMAVGEAISGLFSNPVDVTTGQKILLPETDFTLPGRLPVTCSRFYASHLETVGLLGRGWRLNWETSLREDDEHITLTGVQGRELCYPKTMLTPGHQIFDPKEQLYLSRLHDGRYVLHYTDRSYYVFGDFDSDGMAYLLFMETPHRQRIVFGHEGGRLVRIASSSGHHLLLHRTQTPAGERLSRIELVQG…
A0A3V4F8R2_SALER	RHS repeat protein	AXL30_17970	Salmonella enterica (Salmonella choleraesuis)	1366	MYEAARVDDPIYHTSALAGFLIGAIIGIAIIALAAFAFFSCGFLAGLILGFMADQIASGVLQLGEAIGRSIHHTAGKILTGSENVSTNSRPAARAVLSTVKCDNHIAEKRIAQGSENIYINSQPAARKDDHTECDAVIEDGSPNVFLGGGTQTVLEISSEIPDWLRKVVDVLFVVASLLGGLAGAWRQAAKLGTKFGTKCAAKFIGGELAGMAVGEAISGLFSNPVDVTTGQKILLPETDFTLPGRLPVTCSRFYASHLETVGLLGRGWRLNWETSLREDDEHITLTGVQGRELCYPKTMLTPGHQIFDPKEQLYLSRLHDGRYVLHYTDRSYYVFGDFDSDGMAYLLFMETPHRQRIVFGHEGGRLVRIASSSGHHLLLHRTQTPAGERLSRIELVQG…
A0A3Y5WFG6_SALET	RHS repeat protein	ABO08_04425 D5773_01820 D5W53_19115 DPJ07_05715 EBC34_20750 EHF16_19385	Salmonella enterica I	1366	MYEAARVDDPIYHTSALAGFLIGAIIGIAIIALAAFAFFSCGFLAGLILGFMADQIASGVLQLGEAIGRSIHHTAGKILTGSENVSTNSRPAARAVLSTVKCDNHIAEKRIAQGSENIYINSQPAARKDDHTECDAVIEDGSPNVFLGGGTQTVLEISSEIPDWLRKVVDVLFVVASLLGGLAGAWRQAAKLGTKFGTKCAAKFIGGELAGMAVGEAISGLFSNPVDVTTGQKILLPETDFTLPGRLPVTCSRFYASHLETVGLLGRGWRLNWETSLREDDEHITLTGVQGRELCYPKTMLTPGHQIFDPKEQLYLSRLHDGRYVLHYTDRSYYVFGDFDSDGMAYLLFMETPHRQRIVFGHEGGRLVRIASSSGHHLLLHRTQTPAGERLSRIELVQG…
A0A3V0WM44_SALET	RHS repeat protein	DRT15_21750 DRZ18_22290 DTF17_13965 DTG24_21885	Salmonella enterica I	1366	MYEAARVDDPIYHTSALAGFLIGAIIGIAIIALAAFAFFSCGFLAGLILGFMADQIASGVLQLGEAIGRSIHHTAGKILTGSENVSTNSRPAARAVLSTVKCDNHIAEKRIAQGSENIYINSQPAARKDDHTECDAVIEDGSPNVFLGGGTQTVLEISSEIPDWLRKVVDVLFVVASLLGGLAGAWRQAAKLGTKFGTKCAAKFIGGELAGMAVGEAISGLFSNPVDVTTGQKILLPETDFTLPGRLPVTCSRFYASHLETVGLLGRGWRLNWETSLREDDEHITLTGVQGRELCYPKTMLTPGHQIFDPKEQLYLSRLHDGRYVLHYTDRSYYVFGDFDSDGMAYLLFMETPHRQRIVFGHEGGRLVRIASSSGHHLLLHRTQTPAGERLSRIELVQG…
A0A3U3Q894_SALET	RHS repeat protein	DOW79_23110	Salmonella enterica I	1366	MYEAARVDDPIYHTSALAGFLIGAIIGIAIIALAAFAFFSCGFLAGLILGFMADQIASGVLQLGEAIGRSIHHTAGKILTGSENVSTNSRPAARAVLSTVKCDNHIAEKRIAQGSENIYINSQPAARKDDHTECDAVIEDGSPNVFLGGGTQTVLEISSEIPDWLRKVVDVLFVVASLLGGLAGAWRQAAKLGTKFGTKCAAKFIGGELAGMAVGEAISGLFSNPVDVTTGQKILLPETDFTLPGRLPVTCSRFYASHLETVGLLGRGWRLNWETSLREDDEHITLTGVQGRELCYPKTMLTPGHQIFDPEEQLYLSRLHDGRYVLHYTDRSYYVFGDFDSDGMAYLLFMETPHRQRIVFGHEGGRLVRIASSSGHHLLLHRTQTPAGERLSRIELVQG…
A0A3W8WKA7_SALER	RHS repeat protein	EF957_06940	Salmonella enterica (Salmonella choleraesuis)	1366	MYEAARVDDPIYHTSALAGFLIGAIIGIAIIALAAFAFFSCGFLAGLILGFMADQIASGVLQLGEAIGRSIHHTAGKILTGSENVSTNSRPAARAVLSTVKCDNHIAEKRIAQGSENIYINSQPAARKDDHTECDAVIEDGSPNVFLGGGTQTVLEISSEIPDWLRKVVDVLFVVASLLGGLAGAWRQAAKLGTKFGTKCAAKFIGGELAGMAVGEAISGLFSNPVDVTTGQKILLPETDFTLPGRLPVTCSRFYASHLETVGLLGRGWRLNWETSLREDDEHITLTGVQGRELCYPKTMLTPGHQIFDPKEQLYLSRLHDGRYVLHYTDRSYYVFGDFDSDGMAYLLFMETPHRQRIVFGHEGGRLVRIASSSGHHLLLHRTQTPAGERLSRIELVQG…
A0A3T5MXA6_SALET	Type IV secretion protein Rhs	DLM06_20045	Salmonella enterica I	1373	MYEAARVDDPIYHTSALAGFLIGAIIGIAIIALAAFAFFSCGFLAGLILGFMADQIASGVLQLGEAIGRSIHHTAGKILTGSENVSTNSRPAARAVLSTVKCDNHIAEKRIAQGSENIYINSQPAARKDDHTECDAVIEDGSPNVFLGGGTQTVLEISSEIPEWLRKVVDVLFVVASLLGGLAGAWRQAAKLGTKFGTKCAAKFIGGELVGMAVGEAISGLFSNPVDVTTGQKILLPETDFTLPGRLPVTCSRFYASHLETVGLLGRGWRLNWETSLRDDDEHITLTGVQGRELRYPKTMLTPGHQIFDPEEQLYLSRLHDGRYVLHYTDRSYYVFGDFDSDGMAYLLFMETPHRQRIVFGHEGGRLVRIASSSGHHLLLHRTQTPAGERLSRIELVQG…
A0A3Z4PPW0_SALET	RHS repeat protein	DU844_21410	Salmonella enterica I	1373	MYEAARVDDPIYHTSALAGFLIGAIIGIAIIALAAFAFFSCGFLAGLILGFMADQIASGVLQLGEAIGRSIHHTAGKILTGSENVSTNSRPAARAVLSTVKCDNHIAEKRIAQGSENIYINSQPAARKDDHTECDAVIEDGSPNVFLGGGTQTVLEISSEIPDWLRKVVDVLFVVASLLGGLAGAWRQAAKLGSKFGTKCAAKFIGGELVGMAVGEAISGLFSNPVDVTTGQKILLPETDFTLPGRLPVTCSRFYASHLETVGLLGRGWRLNWETSLREDDEHITLTGVQGRELRYPKTMLTPGHQIFDPEEQLYLSRLHDGRYVLHYTDRSYYVFGDFDSDGMAYLLFMETPHRQRIVFGHEGGRLVRIASSSGHHLLLHRTQTPAGERLSRIELVQG…
A0A3Y7RL16_SALET	RHS repeat protein	CWG53_03200	Salmonella enterica I	1373	MYEAARVDDPIYHTSALAGFLIGAIIGIAIIALAAFAFFSCGFLAGLILGFMADQIASGVLQLGEAIGRSIHHTAGKILTGSENVSTNSRPAARAVLSTVKCDNHIAEKRIAQGSENIYINSQPAARKDDHTECDAVIEDGSPNVFLGGGTQTVLEISSEIPDWLRKVVDVLFVVASLLGGLAGAWRQAAKLGTKFGTKCAAKFIGGELVGMAVGEAISGLFSNPVDVTTGQKILLPETDFTLPGRLPVTCSRFYASHLETVGLLGRGWRLNWETSLREDDEHITLTGVQGRELRYPKTMLTPGHQIFDPKEQLYLSRLHDGRYVLHYTDRSYYVFGDFDSDGMAYLLFMETPHRQRIVFGHEGGRLVRIASSSGHHLLLHRTQTPAGERLSRIELVQG…
A0A3Z3GFM4_SALET	RHS repeat protein	DT153_20025 XI53_22360	Salmonella enterica subsp. enterica serovar Java	1373	MYEAARVDDPIYHTSALAGFLIGAIIGIAIIALAAFAFFSCGFLAGLILGFMADQIASGVLQLGEAIGRSIHHTAGKILTGSENVSTNSRPAARAVLSTVKCDNHIAEKRIAQGSENIYINSQPAARKDDHTECDAVIEDGSPNVFLGGGTQTVLEISSEIPEWLRKVVDVLFVVASLLGGLAGAWRQAAKLGTKFGTKCAAKFIGGELVGMAVGEAISGLFSNPVDVTTGQKILLPETDFTLPGRLPVTCSRFYASHLETVGLLGRGWRLNWETSLRDDDEHITLTGVQGRELRYPKTMLTPGHQIFDPEEQLYLSRLHDGRYVLHYTDRSYYVFGDFDSDGMAYLLFMETPHRQRIVFGHEGGRLVRIASSSGHHLLLHRTQTPAGERLSRIELVQG…
A0A3Z4BHF5_SALET	RHS repeat protein	BXO48_07580 DS368_08615 DUU35_17660 EBC39_17530	Salmonella enterica I	1374	MYEAARVDDPIYHTSALAGFLIGAIIGIAIIALAAFAFFSCGFLAGLILGFMADQIASGVLQLGEAIGRSIHHTAGKILTGSENVSTNSRPAARAVLSTVKCDNHIAEKRIAQGSENIYINSQPAARKDDHTECDAVIEGGSPNVFLGGGTQTVLEISSEIPDWLRKVVDVLFVVASLLGGLAGAWRQAAKLGTKFGTKCAAKFIGGELAGMAVGEAISGLFSNPVDVTTGQKILLPETDFTLPGRLPVTCSRFYASHLETVGLLGRGWRLNWETSLREDDEHITLTGVQGRELCYPKTMLTPGHQIFDPEEQLYLSRLHDGRYVLHYTDRSYYVFGDFDSDGMAYLLFMETPHRQRIVFGHEGGRLVRIASSSGHHLLLHRTQTPAGERLSRIELVQG…
A0A3X5UGA8_SALER	RHS repeat protein	D8N90_21230	Salmonella enterica (Salmonella choleraesuis)	1374	MYEAARVDDPIYHTSALAGFLIGAIIGIAIIALAAFAFFSCGFLAGLILGFMADQIASGVLQLGEAIGRSIHHTAGKILTGSENVSTNSRPAARAVLSTVKCDNHIAEKRIAQGSENIYINSQPAARKNDHTECDAVIEGGSPNVFLGGGTQTVLEISSEIPDWLRKVVDVLFVVASLLGGLAGAWRQAAKLGTKFGTKCAAKFIGGELAGMAVGEAISGLFSNPVDVTTGQKILLPETDFTLPGRLPVTCSRFYASHLETVGLLGRGWRLNWETSLREDDEHITLTGVQGRELCYPKTMLTPGHQIFDPEEQLYLSRLHDGRYVLHYTDRSYYVFGDFDSDGMAYLLFMETPHRQRIVFGHEGGRLVRIASSSGHHLLLHRTQTPAGERLSRIELVQG…
A0A3Y1LZU7_SALER	RHS repeat protein	DUW42_07845	Salmonella enterica (Salmonella choleraesuis)	1374	MYEAARVDDPIYHTSALAGFLIGAIIGIAIIALAAFAFFSCGFLAGLILGFMADQIASGVLQLGEAIGRSIHHTAGKILTGSENVSTNSRPAARAVLSTVKCDHHIAEKRIAQGSENIYINSQPAARKDDHTECDAVIEDGSPNVFLGGGTQTVLEISSEIPDWLRKVVDVLFVVASLLGGLAGAWRQAAKLGTKFGTKCAAKFIGGELAGMAVGEAISGLFSNPVDVTTGQKILLPETDFTLPGRLPVTCSRFYASHLETVGLLGRGWRLNWETSLREDDEHITLTGVQGRELCYPKTMLTPGHQIFDPEEQLYLSRLHDGRYVLHYTDRSYYVFGDFDSDGMAYLLFMETPHRQRIVFGHEGGRLVRIASSSGHHLLLHRTQTPAGERLSRIELVQG…
A0A3V3HJT3_SALMO	RHS repeat protein	CM22_14490 CVB19_21200 DOA62_18790 UK00_21480 XU87_18200	Salmonella montevideo	1374	MYEAARVDDPIYHTSALAGFLIGAIIGIAIIALAAFAFFSCGFLAGLILGFMADQIASGVLQLGEAIGRSIHHTAGKILTGSENVSTNSRPAARAVLSTVKCDNHIAEKRIAQGSENIYINSQPAARKDDHTECDAVIEGGSPNVFLGGGTQTVLEISSEIPDWLRKVVDVLFVVASLLGGLAGAWRQAAKLGTKFGTKCAAKFIGGELAGMAVGEAISGLFSNPVDVTTGQKILLPETDFTLPGRLPVTCSRFYASHLETVGLLGRGWRLNWETSLREDDEHITLTGVQGRELCYPKTMLTPGHQIFDPEEQLYLSRLHDGRYVLHYTDRSYYVFGDFDSDGMAYLLFMETPHRQRIVFGHEGGRLVRIASSSGHHLLLHRTQTPAGERLSRIELVQG…
A0A3U0HAC2_SALET	RHS repeat protein	DNV24_12930	Salmonella enterica I	1374	MYEAARVDDPIYHTSALAGFLIGAIIGIAIIALAAFAFFSCGFLAGLILGFMADQIASGVLQLGEAIGRSIHHTAGKILTGSENVSTNSRPAARAVLSTVKCDHHIAEKRIAQGSENIYINSQPAARKDDHTECDAVIEDGSPNVFLGGGTQTVLEISSEIPDWLRKVVDVLFVVASLLGGLAGAWRQAAKLGTKFGTKCAAKFIGGELAGMAVGEAISGLFSNPVDVTTGQKILLPETDFTLPGRLPVTCSRFYASHLETVGLLGRGWRLNWETSLREDDEHITLTGVQGRELCYPKTMLTPGHQIFDPEEQLYLSRLHDGRYVLHYTDRSYYVFGDFDSDGMAYLLFMETPHRQRIVFGHEGGRLVRIASSSGHHLLLHRTQTPAGERLSRIELVQG…
A0A482EKR5_SALMO	RHS repeat protein	SEEM42N_18780	Salmonella enterica subsp. enterica serovar Montevideo str. 42N	1374	MYEAARVDDPIYHTSALAGFLIGAIIGIAIIALAAFAFFSCGFLAGLILGFMADQIASGVLQLGEAIGRSIHHTAGKILTGSENVSTNSRPAARAVLSTVKCDHHIAEKRIAQGSENIYINSQPAARKDDHTECDAVIEDGSPNVFLGGGTQTVLEISSEIPDWLRKVVDVLFVVASLLGGLAGAWRQAAKLGTKFGTKCAAKFIGGELAGMAVGEAISGLFSNPVDVTTGQKILLPETDFTLPGRLPVTCSRFYASHLETVGLLGRGWRLNWETSLREDDEHITLTGVQGRELCYPKTMLTPGHQIFDPEEQLYLSRLHDGRYVLHYTDRSYYVFGDFDSDGMAYLLFMETPHRQRIVFGHEGGRLVRIASSSGHHLLLHRTQTPAGERLSRIELVQG…
A0A3V8F1G8_SALER	RHS repeat protein	AAV57_10475 BHX66_05275 EA515_02900	Salmonella enterica (Salmonella choleraesuis)	1374	MYEAARVDDPIYHTSALAGFLIGAIIGIAIIALAAFAFFSCGFLAGLILGFMADQIASGVLQLGEAIGRSIHHTAGKILTGSENVSTNSRPAARAVLSTVKCDNHIAEKRIAQGSENIYINSQPAARKDDHTECDAVIEGGSPNVFLGGGTQTVLEISSEIPDWLRKVVDVLFVVASLLGGLAGAWRQAAKLGTKFGTKCAAKFIGGELAGMAVGEAISGLFSNPVDVTTGQKILLPETDFTLPGRLPVTCSRFYASHLETVGLLGRGWRLNWETSLREDDEHITLTGVQGRELCYPKTMLTPGHQIFDPEEQLYLSRLHDGRYVLHYTDRSYYVFGDFDSDGMAYLLFMETPHRQRIVFGHEGGRLVRIASSSGHHLLLHRTQTPAGERLSRIELVQG…
A0A3V2EX74_SALMO	RHS repeat protein	QB52_22025	Salmonella montevideo	1374	MYEAARVDDPIYHTSALAGFLIGAIIGIAIIALAAFAFFSCGFLAGLILGFMADQIASGVLQLGEAIGRSIHHTAGKILTGSENVSTNSRPAARAVLSTVKCDHHIAEKRIAQGSENIYINSQPAARKDDHTECDAVIEDGSPNVFLGGGTQTVLEISSEIPDWLRKVVDVLFVVASLLGGLAGAWRQAAKLGTKFGTKCAAKFIGGELAGMAVGEAISGLFSNPVDVTTGQKILLPETDFTLPGRLPVTCSRFYASHLETVGLLGRGWRLNWETSLREDDEHITLTGVQGRELCYPKTMLTPGHQIFDPEEQLYLSRLHDGRYVLHYTDRSYYVFGDFDSDGMAYLLFMETPHRQRIVFGHEGGRLVRIASSSGHHLLLHRTQTPAGERLSRIELVQG…
A0A3T4DM59_SALET	Type IV secretion protein Rhs	DK101_09410	Salmonella enterica I	1376	MYEAARVDDPIYHTSALAGFLIGAIIGIAIIALAAFAFFSCGFLAGLILGFMADQIASGVLQLGEAIGRSIHHTAGKILTGSENVSTNSRPAARAVLSTVKCDNHIAEKRIAQGSENIYINSQPAARKDDHTECDAVIEDGSPNVFLGGGTQTVLEISSEIPDWLRKVVDVLFVVASLLGGLAGAWRQAAKLGTKFGTKCAAKFIGGELVGMAVGEAISGLFSNPVDVTTGQKILLPETDFTLPGRLPVTCSRFYASHLETVGLLGRGWRLNWETSLREDDEHITLTGVQGRELRYPKTMLTPGHQIFDPEEQLYLSRLHDGRYVLHYTDRSYYVFGDFDSDGMAYLLFMETPHRQRIVFGHEGGRLVRIASSSGHHLLLHRTQTPAGERLSRVELVQG…
A0A3X4XE84_SALER	RHS repeat protein	D7A78_06335	Salmonella enterica (Salmonella choleraesuis)	1376	MYEAARVDDPIYHTSALAGFLIGAIIGIAIIALAAFAFFSCGFLAGLILGFMADQIASGVLQLGEAIGRSIHHTAGKILTGSENVSTNSRPAARAVLSTVKCDNHIAEKRIAQGSENIYINSQPAARKDDHTECDAVIEDGSPNVFLGGGTQTVLEISSEIPDWLRKVVDVLFVVASLLGGLAGAWRQAAKLGTKFGTKCAAKFIGGELVGMAVGEAISGLFSNPVDVTTGQKILLPETDFTLPGRLPVICSRFYASHLETVGLLGRGWRLNWETSLREDDEHITLTGVQGRELRYPKTMLTPGHQIFDPEEQLYLSRLHDGRYVLHYTDRSYYVFGDFDSDGMAYLLFMETPHRQRIVFGHEGGRLVRIASSSGHHLLLHRTQTPAGERLSRIELVQG…
A0A3V7H3E3_SALER	RHS repeat protein	BBG21_06405	Salmonella enterica (Salmonella choleraesuis)	1376	MYEAARVDDPIYHTSALAGFLIGAIIGIAIIALAAFAFFSCGFLAGLILGFMADQIASGVLQLGEAIGRSIHHTAGKILTGSENVSTNSRPAARAVLSTVKCDNHIAEKRIAQGSENIYINSQPAARKDDHTECDAVIEDGSPNVFLGGGTQTVLEISSEIPDWLRKVVDVLFVVASLLGGLAGAWRQAAKLGTKFGTKCAAKFIGGELVGMAVGEAISGLFSNPVDVTTGQKILLPETDFTLPGRLPVTCSRFYASHLETVGLLGRGWRLNWETSLREDDEHITLTGVQGRKLRYPKTMLTPGHQIFDPEEQLYLSRLHDGRYVLHYTDRSYYVFGDFDSDGMAYLLFMETPHRQRIVFGHEGGRLVRIASSSGHHLLLHRTQTPAGERLSRIELVQG…
A0A3Y0DLT4_SALET	RHS repeat protein	D5O23_22525	Salmonella enterica I	1376	MYEAARVDDPIYHTSALAGFLIGAIIGIAIIALAAFAFFSCGFLAGLILGFMADQIASGVLQLGEAIGRSIHHTAGKILTGSENVSTNSRPAARAVLSTVKCDNHIAEKRIAQGSENIYINSQPAARKDDHTECDAVIEDGSPNVFLGGGTQTVLEISSEIPDWLRKVVDVLFVVASLLGGLAGAWRQAAKLGTKFGTKCAAKFIGGELVGMAVGEAISGLFSNPVDVTTGQKILLPETDFTLPGRLPVTCSRFYASHLETVGLLGRGWRLNWETSLREDDEHITLTGVQGRELRYPKTMLTPGHQIFDPKEQLYLSRLHDGRYVLHYTDRSYYVFGDFDSDGMAYLLFMETPHRQRIVFGHEGGRLVRIASSSGHHLLLHRTQTPAGERLSRIELVQG…
A0A3T7S2W0_SALET	RHS repeat protein (Type IV secretion protein Rhs)	DM051_20270 DQK64_02020 DS228_01985 DUP67_01740 EBD77_22950	Salmonella enterica I	1377	MYEAARVDDPIYHTSALAGFLIGAIIGIAIIALAAFAFFSCGFLAGLILGFMADQIASGVLQLGEAIGRSIHHTAGKILTGSENVSTNSRPAARAVLSTVKCDNHIAEKRIAQGSENIYINSQPAARKDDHTECDAVIEDGSPNVFLGGGTQTVLEISSEIPDWLRKVVDVLFVVASLLGGLAGAWRQAAKLGTKFGTKCAAKFIGGELTGMAVSEAISGLFSNPVDVTTGQKILLPETDFTLPGRLPVTCSRFYASHLETVGLLGRGWRLNWETSLRDDDEHITLTGVQGRELRYPKTMLTPGHQIFDPEEQLYLSRLHDGRYVLHYTDRSYYVFGDFDSDGMAYLLFMETPHRQRIVFGHEGGRLVRIASSSGHHLLLHRTQTPAGERLSRIELVQG…
A0A3V7LJZ3_SALET	RHS repeat protein	AXS04_21485	Salmonella enterica I	1377	MYEAARVDDPIYHTSALAGFLIGAIIGIAIIALAAFAFFSCGFLAGLILGFMADQIASGVLQLGEAIGRSIHHTAGKILTGSENVSTNSRPAVRAVLSTVKCDNHIAEKRIAQGSENIYINSQPAARKDDHTECDAVIEDGSPNVFLGGGTQTVLEISSEIPDWLRKVVDVLFVVASLLGGLAGAWRQAAKLGTKFGTKCAAKFIGGELVGMAVGEAISGLFSNPVDVTTGQKILLPETDFTLPGRLPVTCSRFYASHLETVGLLGRGWRLNWETSLREDDEHITLTGVQGRELRYPKTMLTPGHQIFDPEEQLYLSRLHDGRYVLHYTDRSYYVFGDFDSDGMAYLLFMETPHRQRIVFGHEGGRLVRIASSSGHHLLLHRTQTPAGERLSRVELVQG…
A0A403K4I1_SALER	RHS repeat protein	EBH50_25190	Salmonella enterica (Salmonella choleraesuis)	1377	MYEAARVDDPIYHTSALAGFLIGAIIGIAIIALAAFAFFSCGFLAGLILGFMADQIASGVLQLGEAIGRSIHHTAGKILTGSENVSTNSRPAARAVLSTVKCDNHIAEKRIAQGSENIYINSQPAARKDDHTECDAVIEDGSPNVFLGGGTQTVLEISSEIPDWLRKVVDVLFVVASLLGGLAGAWRQAAKLGTKFGTKCAAKFIGGELTGMAVSEAISGLFSNPVDVTTGQKILLPETDFTLPGRLPVTCSRFYASHLETVGLLGRGWRLNWETSLRDDDEHITLTGVQGRELRYPKTMLTPGHQIFDPEEQLYLSRLHDGRYVLHYTDRSYYVFGDFDSDGMAYLLFMETPHRQRIVFGHEGGRLVRIASSSGHHLLLHRTQTPAGERLSRIELVQG…
A0A3V2EAM7_SALAN	RHS repeat protein	EW652_11075 QY66_06280	Salmonella anatum	1377	MYEAARVDDPIYHTSALAGFLIGAIIGIAIIALAAFAFFSCGFLAGLILGFMADQIASGVLQLGEAIGRSIHHTAGKILTGSENVSTNSRPAARAVLSTVKCDNHIAEKRIAQGSENIYINSQPAARKDDHTECDAVIEDGSPNVFLGGGTQTVLEISSEIPDWLRKVVDVLFVVASLLGGLAGAWRQAAKLGTKFGTKCAAKFIGGELVGMAVGEAISGLFSNPVDVTTGQKILLPETDFTLPGRLPVTCSRFYASHLETVGLLGRGWRLNWETSLREDDEHITLTGVQGRELRYPKTMLTPGHQIFDPEEQLYLSRLHDGRYVLHYTDRSYYVFGDFDSDGMAYLLFMETPHRQRIVFGHEGGRLVRIASSSGHHLLLHRTQTPAGERLSRVELVQG…
A0A3T7UIN3_SALET	RHS repeat protein (Type IV secretion protein Rhs)	DM016_22785 EBB78_22040 NB08_22795	Salmonella enterica I	1377	MYEAARVDDPIYHTSALAGFLIGAIIGIAIIALAAFAFFSCGFLAGLILGFMADQIASGVLQLGEAIGRSIHHTAGKILTGSENVSTNSRPAARAVLSTVKCDNHIAEKRIAQGSENIYINSQPAARKDDHTECDAVIEDGSPNVFLGGGTQTVLEISSEIPDWLRKVVDVLFVVASLLGGLAGAWRQAAKLGTKFGTKCAAKFIGGELVGMAVGEAISGLFSNPVDVTTGQKILLPETDFTLPGRLPVTCSRFYASHLETVGLLGRGWRLNWETSLREDDEHITLTGVQGRELRYPKTMLTPGHQIFDPEEQLYLSRLHDGRYVLHYTDRSYYVFGDFDSDGMAYLLFMETPHRQRIVFGHEGGRLVRIASSSGHHLLLHRTQTPAGERLSRVELVQG…
A0A2T8MP32_SALAN	RHS repeat protein	AA325_17715 DRU04_21610 FG704_022900	Salmonella anatum	1377	MYEAARVDDPIYHTSALAGFLIGAIIGIAIIALAAFAFFSCGFLAGLILGFMADQIASGVLQLGEAIGRSIHHTAGKILTGSENVSTNSRPAARAVLSTVKCDNHIAEKRIAQGSENIYINSQPAARKDDHTECDAVIEDGSPNVFLGGGTQTVLEISSEIPDWLRKVVDVLFVVASLLGGLAGAWRQAAKLGTKFGTKCAAKFIGGELVGMAVGEAISGLFSNPVDVTTGQKILLPETDFTLPGRLPVTCSRFYASHLETVGLLGRGWRLNWETSLREDDEHITLTGVQGRELRYPKTMLTPGHQIFDPEEQLYLSRLHDGRYVLHYTDRSYYVFGDFDSDGMAYLLFMETPHRQRIVFGHEGGRLVRIASSSGHHLLLHRTQTPAGERLSRVELVQG…
A0A3X1BFS6_SALER	RHS repeat protein	A9X20_04770 D8J04_23885 D9U10_11550 DXO79_22680	Salmonella enterica (Salmonella choleraesuis)	1377	MYEAARVDDPIYHTSALAGFLIGAIIGIAIIALAAFAFFSCGFLAGLILGFMADQIASGVLQLGEAIGRSIHHTAGKILTGSENVSTNSRPAARAVLSTVKCDNHIAEKRIAQGSENIYINSQPAARKDDHTECDAVIEDGSPNVFLGGGTQTVLEISSEIPDWLRKVVDVLFVVASLLGGLAGAWRQAAKLGTKFGTKCAAKFIGGELVGMAVGEAISGLFSNPVDVTTGQKILLPETDFTLPGRLPVTCSRFYASHLETVGLLGRGWRLNWETSLREDDEHITLTGVQGRELRYPKTMLTPGHQIFDPEEQLYLSRLHDGRYVLHYTDRSYYVFGDFDSDGMAYLLFMETPHRQRIVFGHEGGRLVRIASSSGHHLLLHRTQTPAGERLSRIELVQG…
A0A3V6KKM5_SALET	RHS repeat protein	AXS89_03095	Salmonella enterica I	1377	MYEAARVDDPIYHTSALAGFLIGAIIGIAIIALAAFAFFSCGFLAGLILGFMADQIASGVLQLGEAIGRSIHHTAGKILTGSENVSTNSRPAARAVLSTVKCDNHIAEKRIAQGSENIYINSQPAARKDDHTECDAVIEDGSPNVFLGGGTQTVLEISSEIPDWLRKVVDVLFVVASLLGGLAGAWRQAAKLGTKFGTKCAAKFIGGELVGMAVGEAISGLFSNPVDVTTGQKILLPETDFTLPGRLPVTCSRFYASHLETVGLLGRGWRLNWETSLREDDEHITLTGVQGRELRYPKTMLTPGHQIFDPEEQLYLSRLHDGRYVLHYTDRSYYVFGDFDSDGMAYLLFMETPHRQRIVFGHEGGRLVRIASSSGHHLLLHRTQTPAGERLSRIELVQG…
A0A3Y7E1U8_SALET	RHS repeat protein	EBK37_10965	Salmonella enterica I	1377	MYEAARVDDPIYHTSALAGFLIGAIIGIAIIALAAFAFFSCGFLAGLILGFMADQIASGVLQLGEAIGRSIHHTAGKILTGSENVSTNSRPAARAVLSTVKCDNHIAEKRIAQGSENIYINSQPAARKDDHTECDAVIEDGSPNVFLGGGTQTVLEISSEIPDWLRKVVDVLFVVASLLGGLAGAWRQAAKLGTKFGTKCAAKFIGGELVGMAVGEAISGLFSNPVDVTTGQKILLPETDFTLPGRLPVTCSRFYASHLETVGLLGRGWRLNWETSLRDDDEHITLTGVQGRELRYPKTMLTPGHQIFDPEEQLYLSRLHDGRYVLHYTDRSYYVFGDFDSDGMAYLLFMETPHCQRIVFGHEGGRLVRIASSSGHHLLLHRTQTPAGERLSRIELVQG…
A0A3R0PHF2_SALET	RHS repeat protein (Type IV secretion protein Rhs)	AC391_19500 AIB97_17855 D4E71_07880 D5947_22885 D5C08_07895 D5C64_04850 D5X91_05100 D7M98_12760 D7N14_07705 DK083_05650 DMM16_02995 DMM21_13775 DN271_14580 DNM48_04930 DNU22_05695 DNY10_22885 DNY38_22030 DO649_22625 DPE32_07885 DPE39_02995 DPS27_12935 DQ816_10500 DQQ94_21965 DQY91_08205 DRL48_12875 DRW94_07155 DS467_23205 DSM85_12970 DSN41_13135 DU116_22965 DU792_01430 DUV83_04955 DUW53_02440 EAE…	Salmonella enterica I	1377	MYEAARVDDPIYHTSALAGFLIGAIIGIAIIALAAFAFFSCGFLAGLILGFMADQIASGVLQLGEAIGRSIHHTAGKILTGSENVSTNSRPAARAVLSTVKCDNHIAEKRIAQGSENIYINSQPAARKDDHTECDAVIEDGSPNVFLGGGTQTVLEISSEIPDWLRKVVDVLFVVASLLGGLAGAWRQAAKLGTKFGTKCAAKFIGGELVGMAVGEAISGLFSNPVDVTTGQKILLPETDFTLPGRLPVTCSRFYASHLETVGLLGRGWRLNWETSLREDDEHITLTGVQGRELRYPKTMLTPGHQIFDPEEQLYLSRLHDGRYVLHYTDRSYYVFGDFDSDGMAYLLFMETPHRQRIVFGHEGGRLVRIASSSGHHLLLHRTQTPAGERLSRIELVQG…
A0A3Z8BE73_SALER	RHS repeat protein	D7W03_21440	Salmonella enterica (Salmonella choleraesuis)	1377	MYEAARVDDPIYHTSALAGFLIGAIIGIAIIALAAFAFFSCGFLAGLILGFMADQIASGVLQLGEAIGRSIHHTAGKILTGSENVSTNSRPAARAVLSTVKCDNHIAEKRIAQGSENIYINSQPAARKDDHTECDAVIEDGSPNVFLGGGTQTVLEISSEIPDWLRKVVDVLFVVASLLGGLAGAWRQAAKLGTKFGTKCAAKFIGGELVGMAVGEAISGLFSNPVDVTTGQKILLPETDFTLPGRLPVTCSRFYASHLETVGLLGRGWRLNWETSLREDDEHITLTGVQGRELRYPKTMLTPGHQIFDPEEQLYLSRLHDGRYVLHYTDRSYYVFGDFDSDGMAYLLFMETPHRQRIVFGHEGGRLVRIASSSGHHLLLHRTQTPAGERLSRVELVQG…
A0A3U1THK3_SALET	RHS repeat protein	DN322_18555	Salmonella enterica I	1377	MYEAARVDDPIYHTSALAGFLIGAIIGIAIIALAAFAFFSCGFLAGLILGFMADQIASGVLQLGEAIGRSIHHTAGKILTGSENVSTNSRPAARAVLSTVKCDNHIAEKRIAQGSENIYINSQPAARKDDHTECDAVIEDGSPNVFLGGGTQTVLEISSEIPDWLRKVVDVLFVVASLLGGLAGAWRQAAKLGTKFGTKCAAKFIGGELTGMAVSEAISGLFSNPVDVTTGQKILLPETDFTLPGRLPVTCSRFYASHLETVGLLGRGWRLNWETSLRDDDEHITLTGVQGRELRYPKTMLTPGHQIFDPEEQLYLSRLHDGRYVLHYTDRSYYVFGDFDSDGMAYLLFMETPHRQRIVFGHEGGRLVRIASSSGHHLLLHRTQTPAGERLSRIELVQG…
A0A3U0ZPP5_SALET	RHS repeat protein (Type IV secretion protein Rhs)	CE94_20605 DKJ07_20615 DNZ75_20890 DPJ81_20125 DQK53_23120 DQT59_20070	Salmonella enterica I	1377	MYEAARVDDPIYHTSALAGFLIGAIIGIAIIALAAFAFFSCGFLAGLILGFMADQIASGVLQLGEAIGRSIHHTAGKILTGSENVSTNSRPAARAVLSTVKCDNHIAEKRIAQGSENIYINSQPAARKDDHTECDAVIEDGSPNVFLGGGTQTVLEISSEIPDWLRKVVDVLFVVASLLGGLAGAWRQAAKLGTKFGTKCAAKFIGGELVGMAVGEAISGLFSNPVDVTTGQKILLPETDFTLPGRLPVTCSRFYASHLETVGLLGRGWRLNWETSLREDDEHITLTGVQGRELRYPKTMLTPGHQIFDPEEQLYLSRLHDGRYVLHYTDRSYYVFGDFDSDGMAYLLFMETPHRQRIVFGHEGGRLVRIASSSGHHLLLHRTQTPAGERLSRVELVQG…
A0A3W9RVW7_SALER	RHS repeat protein	EI201_13975	Salmonella enterica (Salmonella choleraesuis)	1377	MYEAARVDDPIYHTSALAGFLIGAIIGIAIIALAAFAFFSCGFLAGLILGFMADQIASGVLQLGEAIGRSIHHTAGKILTGSENVSTNSRPAARAVLSTVKCDNHIAEKRIAQGAENIYINSQPAARKDDHTECDAVIEDGSPNVFLGGGTQTVLEISSEIPDWLRKVVDVLFVVASLLGGLAGAWRQAAKLGTKFGTKCAAKFIGGELTGMAVSEAISGLFSNPVDVTTGQKILLPETDFTLPGRLPVTCSRFYASHLETVGLLGRGWRLNWETSLRDDDEHITLTGVQGRELRYPKTMLTPGHQIFDPEEQLYLSRLHDGRYVLHYTDRSYYVFGDFDSDGMAYLLFMETPHRQRIVFGHEGGRLVRIASSSGHHLLLHRTQTPAGERLSRIELVQG…
A0A3T4D5I7_SALET	Type IV secretion protein Rhs	DK052_03495	Salmonella enterica I	1377	MYEAARVDDPIYHTSALAGFLIGAIIGIAIIALAAFAFFSCGFLAGLILGFMADQIASGVLQLGEAIGRSIHHTAGKILTGSENVSTNSRPAARAVLSTVKCDNHIAEKRIAQGSENIYINSQPAARKDDHTECDAVIEDGSPNVFLGGGTQTVLEISSEIPDWLRKVVDVLFVVASLLGGLAGAWRQAAKLGTKFGTKCAAKFIGGELVGMAVGEAISGLFSNPVDVTTGQKILLPETDFTLPGRLPVTCSRFYASHLETVGLLGRGWRLNWETSLREDDEHITLTGVQGRELRYPKTMLTPGHQIFDPKEQLYLSRLHDGRYVLHYTDRSYYVFGDFDSDGMAYLLFMETPHRQRIVFGHEGGRLVRIASSSGHHLLLHRTQTPAGERLSRIELVQG…
A0A3Y5VXR2_SALET	RHS repeat protein	D4X68_11265 DPB55_10710	Salmonella enterica I	1377	MYEAARVDDPIYHTSALAGFLIGAIIGIAIIALAAFAFFSCGFLAGLILGFMADQIASGVLQLGEAIGRSIHHTAGKILTGSENVSTNSRPAARAVLSTVKCDNHIAEKRIAQGSENIYINSQPAARKDDHTECDAVIEDGSPNVFLGGGTQTVLEISSEIPDWLRKVVDVLFVVASLLGGLAGAWRQAAKLGTKFGTKCAAKFIGGELTGMAVSEAISGLFSNPVDVTTGQKILLPETDFTLPGRLPVTCSRFYASHLETVGLLGRGWRLNWETSLRDDDEHITLTGVQGRELRYPKTMLTPGHQIFDPEEQLYLSRLHDGRYVLHYTDRSYYVFGDFDSDGMAYLLFMETPHRQRIVFGHEGGRLVRIASSSGHHLLLHRTQTPAGERLSRIELVQG…
A0A3V5FIL0_SALER	RHS repeat protein	EGC01_05270	Salmonella enterica (Salmonella choleraesuis)	1377	MYEAARVDDPIYHTSALAGFLIGAIIGIAIIALAAFAFFSCGFLAGLILGFMADQIASGVLQLGEAIGRSIHHTAGKILTGSENVSTNSRPAARAVLSTVKCDNHIAEKRIAQGSENIYINSQPAARKDDHTECDAVIEDGSPNVFLGGGTQTVLEISSEIPDWLRKVVDVLFVVASLLGGLAGAWRQSAKLGTKFGTKCAAKFIGGELVGMAVGEAISGLFSNPVDVTTGQKILLPETDFTLPGRLPVTCSRFYASHLETVGLLGRGWRLNWETSLREDDEHITLTGVQGRELRYPKTMLTPGHQIFDPEEQLYLSRLHDGRYVLHYTDRSYYVFGDFDSDGMAYLLFMETPHRQRIVFGHEGGRLVRIASSSGHHLLLHRTQTPAGERLSRIELVQG…
A0A3Y7NVT8_SALET	RHS repeat protein	D5O40_01730	Salmonella enterica I	1377	MYEAARVDDPIYHTSALAGFLIGAIIGIAIIALAAFAFFSCGFLAGLILGFMADQIASGVLQLGEAIGRSIHHTAGKILTGSENVSTNSRPAARAVLSTVKCDNHIAEKRIAQGSENIYINSQPAARKDDHTECDAVIEDGSPNVFLGGGTQTVLEISSEIPDWLRKVVDVLFVVASLLGGLAGAWRQAAKLGTKFGTKCAAKFIGGELTGMAVSEAISGLFSNPVDVTTGQKILLPETDFTLPGRLPVTCSRFYASHLETVGLLGRGWRLNWETSLRDDDEHITLTGVQGRELRYPKTMLTPGHQIFDPEEQLYLSRLHDGRYVLHYTDRSYYVFGDFDSDGMAYLLFMETPHRQRIVFGHEGGRLVRIASSSGHHLLLHRTQTPAGERLSRIELVQG…
G5N889_SALET	Putative RHS-family protein	LTSEINV_0533	Salmonella enterica subsp. enterica serovar Inverness str. R8-3668	1380	MYEAARVDDPIYHTSALAGFLIGAIIGIAIIALAAFAFFSCGFLAGLILGFMADQIASGVLQLGEAIGRSIHHTAGKILTGSENVSTNSRPAARAVLSTVKCDNHIAEKRIAQGSENIYINSQPAARKDDHTECDAVIEDGSPNVFLGGGTQTVLEISSEIPDWLRKVVDVLFVVASLLGGLAGAWRQAAKLGTKFGTKCAAKFIGGELVGMAVGEAISGLFSNPVDVTTGQKILLPETDFTLPGRLPVTCSRFYASHLETVGLLGRGWRLNWETSLREDDEHITLTGVQGRELRYPKTMLTPGHQIFDPEEQLYLSRLHDGRYVLHYTDRSYYVFGDFDSDGMAYLLFMETPHRQRIVFGHEGGRLVRIASSSGHHLLLHRTQTPAGERLSRIELVQG…
A0A3Y0I1N2_SALET	RHS repeat protein	DTG02_13245 DTG49_18560	Salmonella enterica I	1382	MYEAARVDDPIYHTSALAGFLIGAIIGIAIIALAAFAFFSCGFLAGLILGFMADQIASGVLQLGEAIGRSIHHTAGKILTGSENVSTNSRPAARAVLSTVKCDNHIAEKRIAQGSENIYINSQPAARKDDHTECDAVIEDGSPNVFLGGGTQTVLEISSEIPDWLRKVVDVLFVVASLLGGLAGAWRQAAKLGTKFGTKCAAKFIGGELAGMAVGEAISGLFSNPVDVTTGQKILLPETDFTLPGRLPVTCSRFYASHLETVGLLGRGWRLNWETSLREDDEHITLTGVQGRELCYPKTMLTPGHQIFDPEEQLYLSRLHDGRYVLHYTDRSYYVFGDFDSDGMAYLLFMETPHRQRIVFGHEGGRLVRIASSSGHHLLLHRTQTPAGERLSRIELVQG…
A0A3T7JNH4_SALET	RHS repeat protein (Type IV secretion protein Rhs)	DMV34_22320 DN181_04935	Salmonella enterica I	1385	MYEAARVDDPIYHTSALAGFLIGAIIGIAIIALAAFAFFSCGFLAGLILGFMADQIASGVLQLGEAIGRSIHHTAGKILTGSENVSTNSRPAARAVLSTVKCDNHIAEKRIAQGSENIYINSQPAARKDDHTECDAVIEDGSPNVFLGGGTQTVLEVSSEIPDWLRKVVDVLFVVASLLGGLAGAWRQAAKLGTKFGTKCAAKFIGGELVGMAVGEAISGLFSNPVDVTTGQKILLPETDFTLPGRLPVTCSRFYASHLETVGLLGRGWRLNWETSLREDDEHITLTGVQGRELRYPKTMLTPGHQIFDPEEQLYLSRLHDGRYVLHYTDRSYYVFGDFDSDGMAYLLFMETPHRQRIVFGHEGGRLVRIASSSGHHLLLHRTQTPAGERLSRIELVQG…
A0A3W6VNS0_SALER	RHS repeat protein	EAD67_11680	Salmonella enterica (Salmonella choleraesuis)	1385	MYEAARVDDPIYHTSALAGFLIGAIIGIAIIALAAFAFFSCGFLAGLILGFMADQIASGVLQLGEAIGRSIHHTAGKILTGSENVSTNSRPAARAVLSTVKCDNHIAEKRIAQGSENIYINSQPAARKDDHTECDAVIEDGSPNVFLGGGTQTVLEVSSEIPDWLRKVVDVLFVVASLLGGLAGAWRQAAKLGTKFGTKCAAKFIGGELVGMAVGEAISGLFSNPVDVTTGQKILLPETDFTLPGRLPVTCSRFYASHLETVGLLGRGWRLNWETSLREDDEHITLTGVQGRELRYPKTMLTPGHQIFDPEEQLYLSRLHDGRYVLHYTDRSYYVFGDFDSDGMAYLLFMETPHRQRIVFGHEGGRLVRIASSSGHHLLLHRTQTPAGERLSRIELVQG…
A0A2X3KDC1_ECOLX	Rhs core protein	NCTC8009_06669	Escherichia coli	114	MKRAANDKAIAQMLAAKKSGPPAARLGDEIQHKSFLGALAGAVLGAIVTIAEGCLIMAACATGPYALVLVPALMYASYKASDYVEEKQNQLESWINSFCDTDGAINTGSENVKH
A0A3U6DZG9_ECOLX	Uncharacterized protein (Fragment)	DQL91_27100	Escherichia coli	411	MSEGPGGPQGATAGGTLAMRMLSQQAMVASQMKRAANDKAIAQMLASKKSGPPAARLGDEIQHKSFLGALAGAVLGAIVTIAEGCLIMAACATGPYALVLVPALMYASYKASDYVEEKQNQLESWINSFCDTDGAINTGSENVKINGELAARAAVTLPPPPPPGAIPEVPQGEPSWGDIATDLLESAAEKAVPLAKAWGNAVITLTDSNAGFMDRVSAGASLLFPAGPVLMEFATMVGGRGEIKKEVDFPEAGEDTALCDKENKPPRIAQGSSNVFINNQPAARKGDKLECSAVIVGGSPDVFIGGEQVTYLDIQPEFPPWQRMILGGITIASYLLPPAGLLGKLKNLARLGKLGNLLGKSGKLLGAKLGALLGKTGKSLKSIANKVIRWVTDPVDPVT…
A0A3X3EUZ6_SALER	RHS repeat protein (Type IV secretion protein Rhs)	D8V54_01385 DKT82_23195	Salmonella enterica (Salmonella choleraesuis)	1422	MYEAARVDDPIYHTSALAGFLIGAIIGIAIIALAAFAFFSCGFLAGLILGFMADQIASGVLQLGEAIGRSIHHTAGKILTGSENVSTNSRPAARAVLSTVKCDNHIAEKRIAQGSENIYINSQPAARKDDHTECDAVIEDGSPNVFLGGGTQTVLEISSEIPDWLRKVVDVLFVVASLLGGLAGAWRQAAKLGTKFGTKCAAKFIGGELTGMAVSEAISGLFSNPVDVTTGQKILLPETDFTLPGRLPVTCSRFYASHLETVGLLGRGWRLNWETSLREDDEHITLTGVQGRELRYPKTMLTPGHQIFDPKEQLYLSRLHDGRYVLHYTDRSYYVFGDFDSDGMAYLLFMETPHRQRIVFGHEGGRLVRIASSSGHHLLLHRTQTPAGERLSRIELVQG…
A0A3M3H8U6_9PSED	YD repeat protein (Fragment)	ALQ71_04533	Pseudomonas coronafaciens pv. striafaciens	91	MMFEAARFGDEISHTGALGGFLIGAVLGIALIATVAIATFTCGFGVALLAGLAAGVGGSLLTAAGEAIGSMFSSPSGTIITASPNVYINNR
A0A0P9UVE0_PSEA0	YD repeat protein (Fragment)	ALO63_05271	Pseudomonas amygdali pv. mori	153	MFEAARFGDEISHTGALGGFLIGAVLGIALIATVAIATFTCGFGVALLAGLAAGVGGSLLTAAGEAIGSMFSSPSGTIITASPNVYINNRKAAHVEKSIGACEKHPGPIRIAEGSTNVFINSVAAARKGDKLTCGATISGGSNNVFIGGGRYR
A0A2A3UJV3_ECOLX	Type IV secretion protein Rhs	COD30_29245	Escherichia coli	1578	MSEGPGGPQGATAGGTLAMRMLSQQAMVASQMKRAANDKAIAQMLAAKKSGPPAARLGDEIQHKSFLGALAGAVLGAIVTIAEGCLIMAACATGPYALVLVPALMYASYKASDYVEEKQNQLESWINSFCDTDGAINTGSENVNINGKPAARAAVTLPPPPPPGAIPEIPQGEPSWGDIATDLLESAAEKAVPLAKAWGNAVITLTESNAGFMDRVSAGASLLFPAGPVLMEFATMVGGRSEIKKDVDFPEAGEDTALCDKENKPPRIAQGSSNVFINNQPAARKGDKLECSAAIVGGLPDVFIGGEQVTYLDIQPEFPPWQRMILGGITIASYLLPPAGLLGKLKNLARLGKLGNLLGKSGKLLGAKLGALLGKTGKSLKSIANKVIRWVTDPVDPVT…
A0A2X1NX29_ECOLX	Rhs core protein	NCTC9777_03678	Escherichia coli	328	MSEGPGGPQGATAGGTLAMRMLSQQAMVASQMKRAANDKAIAQMLASKKSGPPAARLGDEIQHKSFLGALAGAVLGAIVTIAEGCLIMAACATGPYALVLVPALMYASYKASDYVEEKQNQLESWINSFCDTDGAINTGSENVNINGKPAARAAVTLPPPPPPGAIPEIPQGEPSWGDIATDLLESAAEKAVPLAKAWGNAVITLTDSNAGFMDRVSAGASLLFPAGPVLMEFATMVGGRGEIKKDVDFPEAGEDTALCDKENKPPRIAQGSSNVFINNQPATRKGDKLECSAAIVEGSPDVFIGGEQVTYLDIQPEFPPWQRMILGE
A0A326SQ60_9PSED	Putative Zn-binding protein involved in type VI secretion (Fragment)	C7528_116117	Pseudomonas sp. NP10-3	178	MFEAARFGDEISHTGALGGFLIGAVLGIALIATVAIATFTCGFGVALLAGLAAGVGGSLLTAAGEAIGSMFSSPSGTIITASPNVYINNRKAAHVEKSIGACDKHPGPVKIAEGSTNVFINSVAAARKGDKLTCGATISGGSDNVFIGGGRYRYLPVDDEIPGWLRTTVDVLMAVAGA
A0A370UZZ2_9ESCH	Putative deoxyribonuclease RhsB (EC 3.1.-.-)	rhsB C4A13_00321	Escherichia marmotae	1370	MYEAARVDDPIYHTSALAGFLIGAIIGIAIIAAASFAFATCGFFAGLVLGFLADQIASGVLQLGEAIGRSIHSTAGKILTGSDNVRTNSRPAARAVLSTVICEDHSPEIRIAQGSGNIYINSQPAARKDDHTECDAVIEDGSPNVFLGGGTQTVLEISPEIPDWLRQVVDVLYVVAGMLGGLAGASRQATKMGSKFGTKCAAKFIGGEIAGMGISEAAMGLFSNPVDVTTGQKILLPETDFTLPGRLPVTCSRFYASHLETEGLLGKGWRLNWEITLRTDEKYITLIGGQGRELSYPKDMLTPGHQIFDPEEQFYLSRLHDGRYVLHYTDRSYYIFDEFDDHGVAPLLFMETPYRQRIAFGRENGRLVRVASSSGHHLLLHRTMTPAGERLSHIELVKG…
A0A3Z2TU22_ECOLX	Type IV secretion protein Rhs	DTY75_23695	Escherichia coli	1505	MSEGPGGPQGATAGGTLAMRMQSQRAMVASQMKRAANDKAIAQMLAAKKSGPPAARLDDEIQHKSFLGALAGAVLGAIVTIAEGCLIMAACATGPYALVLVPALMYASYKASDYVEEKQNQLESWINSFCDTDGAINTGSENVNINGKPAARAAVTLPPPPPPGAIPEVPQGEPSWGDIATDLLESAAEKAVPLAKAWGNAVITLTDSNAGFMDRLCAGTSLLFPYGPVLMEFATMVGGRGEIKKDVDFPEAGEDTALCDKETKPPRIAQGSSNVFINNQPAARKGDKLECSAAIVGGSPDVFIGGEQVTYLDIQPEFPPWQRMILGGITIASYLLPPAGLLGKLKNLARLGKLGNLLGKSGKLLGAKLGALLGKTGKSLKSIANKVIRWVTDPVDPVT…
A0A376UE02_ECOLX	Rhs core protein	NCTC8622_06890	Escherichia coli	142	MSEGPGGPQGATAGGTLAMRMLSQQAMVASQMKRAANDKAIAQMLAAKKSGPPAARLGDEIQHKSFLGALAGAVLGAIVTIAEGCLIMAACATGPYALVLVPALMYASYKASDYVEEKQNQLESWINSFCDTDGAINTGSEM
A0A418TX91_ECOLX	Type IV secretion protein Rhs	D2185_21205	Escherichia coli	1505	MSEGPGGPQGATAGGTLAMRMQSQRAMVASQMKRAANDKAIAQMLAAKKSGPPAARLDDEIQHKSFLGALAGAVLGAIVTIAEGCLIMAACATGPYALVLVPALMYASYKASDYVEEKQNQLESWINSFCDTDGAINTGSENVNINGKPAARAAVTLPPPPPPGAIPEVPQGEPSWGDIATDLLESAAEKAVPLAKAWGNAVIPLTDSNAGFMDRLCAGTSLLFPYGPVLMEFATMVGGRGEIKKDVDFPEAGEDTALCDKETKPPRIAQGSSNVFINNQPAARKGDKLECSAAIVGGSPDVFIGGEQVTYLDIQPEFPPWQRMILGGITIASYLLPPAGLLGKLKNLARLGKLGNLLGKSGKLLGAKLGALLGKTGKSLKSIANKVIRWVTDPVDPVT…
A0A073G164_ECOLX	RHS Repeat family protein	AD31_0828	Escherichia coli 2-427-07_S4_C3	1199	MSEGPGGPQGATAGGTLAMRMLSQQAMVASQMKRAANDKAIAQMLASKKSGPPAARLGDEIQHKSFLGALAGAVLGAIVTIAEGCLIMAACATGPYALVLVPALMYASYKASDYVEEKQNQLESWINSFCDTDGAINTGSENVKINGELAARAAVTLPPPPPPGAIPEVPQGEPSWGDIATDLLESAAEKAVPLAKAWGNAVITLTDSNAGFMDRVSAGASLLFPAGPVLMEFATMVGGRGEIKKEVDFPEAGEDTALCDKENKPPRIAQGSSNVFINNQPAARKGDKLECSAVIVGGSPDVFIGGEQVTYLDIQPEFPPWQRMILGGITIASYLLPPAGLLGKLKNLARLGKLGNLLGKSGKLLGAKLGALLGKTGKSLKSIANKVIRWVTDPVDPVT…
A0A080GB77_ECOLX	RHS Repeat family protein	AD40_0637	Escherichia coli 1-392-07_S4_C3	1175	MSEGPGGPQGATAGGTLAMRMLSQQAMVASQMKRAANDKAIAQMLASKKSGPPAARLGDEIQHKSFLGALAGAVLGAIVTIAEGCLIMAACATGPYALVLVPALMYASYKASDYVEEKQNQLESWINSFCDTDGAINTGSENVKINGELAARAAVTLPPPPPPGAIPEVPQGEPSWGDIATDLLESAAEKAVPLAKAWGNAVITLTDSNAGFMDRVSAGASLLFPAGPVLMEFATMVGGRGEIKKEVDFPEAGEDTALCDKENKPPRIAQGSSNVFINNQPAARKGDKLECSAVIVGGSPDVFIGGEQVTYLDIQPEFPPWQRMILGGITIASYLLPPAGLLGKLKNLARLGKLGNLLGKSGKLLGAKLGALLGKTGKSLKSIANKVIRWVTDPVDPVT…
A0A4C6JEB1_ECOLX	Type IV secretion protein Rhs	HmCmsJML079_04615	Escherichia coli	1175	MSEGPGGPQGATAGGTLAMRMLSQQAMVASQMKRAANDKAIAQMLASKKSGPPAARLGDEIQHKSFLGALAGAVLGAIVTIAEGCLIMAACATGPYALVLVPALMYASYKASDYVEEKQNQLESWINSFCDTDGAINTGSENVKINGELAARAAVTLPPPPPPGAIPEVPQGEPSWGDIATDLLESAAEKAVPLAKAWGNAVITLTDSNAGFMDRVSAGASLLFPAGPVLMEFATMVGGRGEIKKEVDFPEAGEDTALCDKENKPPRIAQGSSNVFINNQPAARKGDKLECSAVIVGGSPDVFIGGEQVTYLDIQPEFPPWQRMILGGITIASYLLPPAGLLGKLKNLARLGKLGNLLGKSGKLLGAKLGALLGKTGKSLKSIANKVIRWVTDPVDPVT…
A0A074I7X0_ECOLX	RHS Repeat family protein	AC84_0637	Escherichia coli 1-392-07_S4_C1	1175	MSEGPGGPQGATAGGTLAMRMLSQQAMVASQMKRAANDKAIAQMLASKKSGPPAARLGDEIQHKSFLGALAGAVLGAIVTIAEGCLIMAACATGPYALVLVPALMYASYKASDYVEEKQNQLESWINSFCDTDGAINTGSENVKINGELAARAAVTLPPPPPPGAIPEVPQGEPSWGDIATDLLESAAEKAVPLAKAWGNAVITLTDSNAGFMDRVSAGASLLFPAGPVLMEFATMVGGRGEIKKEVDFPEAGEDTALCDKENKPPRIAQGSSNVFINNQPAARKGDKLECSAVIVGGSPDVFIGGEQVTYLDIQPEFPPWQRMILGGITIASYLLPPAGLLGKLKNLARLGKLGNLLGKSGKLLGAKLGALLGKTGKSLKSIANKVIRWVTDPVDPVT…
A0A3Y5VQQ7_ECOLX	Uncharacterized protein (Fragment)	DS721_26940	Escherichia coli	146	MSEGPGGPQGATAGGTLAMRMLSQRAMAASQMKRAANDKAIAQMLASKKSGPPAARLGDEIQHKSFLGALAGAVLGAIVTIAEGCLIMAACATGPYALVLVPALMYASYKASDYVEEKQNQLESWINSFCDTDGAINTGSKNVKIN
A0A3Z0TZ81_ECOLX	Uncharacterized protein (Fragment)	D9X99_13625	Escherichia coli	158	MSEGPGGPQGATAGGTLAMRMLSQRAMAASQMKRAANDKAIAQMLASKKSGPPAARLGDEIQHKSFLGALAGAVLGAIVTIAEGCLIMAACATGPYALVLVPALMYASYKASDYVEEKQNQLESWINSFCDTDGAINTGSKNVKINGKPAARAAVTLP
A0A3Y6BNU1_ECOLX	Uncharacterized protein (Fragment)	D5G81_03240	Escherichia coli	148	MSEGPGGPQGATAGGTLAMRMLSQRAMAASQMKRAANDKAIAQMLASKKSGPPAARLGDEIQHKSFLGALAGAVLGAIVTIAEGCLIMAACATGPYALVLVPALMYASYKASDYVEEKQNQLESWINSFCDTDGAINTGSKNVKINGK
A0A3T7RE85_ECOLX	Uncharacterized protein (Fragment)	DM267_26815	Escherichia coli	159	MSEGPGGPQGATAGGTLAMRMLSQQAMVASQMKRAANDKAIAQMLAAKKSGPPAARLGDEIQHKSFLGALAGAVLGAIVTIAEGCLIMAACATGPYALVLVPALMYASYKASDYVEEKQNQLESWINSFCDTDGAINTGSENVNINGKPAARAAVTLPP
A0A3Z2H142_SALET	RHS repeat protein	DVF01_05170	Salmonella enterica I	1359	MYEAARMDDPIYHTSALAGFLIGAIIGIAIIALAAFAFFSCGFLAGLILGFMADQIASGVLQLGEAIGRSIHHTAGKILTGSENVSTNSRPAARAVLSTVKCDNHIAEKRIAQGSENIYINSQPAARKDDHTECDAVIEDGSPNVFLGGGTQTVLEISSEIPDWLRKVVDVLFVVASLLGGLAGAWRQAAKLGTKFGTKCAAKFIGGELAGMAVGEAISGLFSNPVDVTTGQKILLPETDFTLPGRLPVTCSRFYASHLETVGLLGRGWRLNWETSLREDDEHITLTGVQGRELCYPKTMLTPGHQIFDPEEQLYLSRLHDGRYVLHYTDRSYYVFGDFDSDGMAYLLFMETPHRQRIVFGHEGGRLVRIASSSGHHLLLHRTQTPAGERLSRIELVQG…
A0A3Y1CT18_SHISO	Uncharacterized protein (Fragment)	EBC63_12870	Shigella sonnei	148	MSEGPGGPQGATAGGTLAMRMLSQQAMVASQMKRAANDKAIAQMLASKKSGPPAARLGDEIQHKSFLGALAGAVLGAIVTIAEGCLIMAACATGPYALVLVPALMYASYKASDYVEEKQNQLESWINSFCDTDGAINTGSENVKINGE
A0A3Z6JBC1_ECOLX	Uncharacterized protein (Fragment)	EBM08_26590	Escherichia coli	151	MSEGPGGPQGATAGGTLAMRMLSQQAMVASQMKRAANDKAIAQMLAAKKSGPPAARLGDEIQHKSFLGALAGAVLGAIVTIAEGCLIMAACATGPYALVLVPALMYASYKASDYVEEKQNQLESWINSFCDTDGAINTGSENVNINGKPAA
A0A3Z2QA35_ECOLX	Type IV secretion protein Rhs (Fragment)	D7Y72_26495	Escherichia coli	162	MSEGPGGPQGATAGGTLAMRMLSQRAMAASQMKRAANDKAIAQMLASKKSGPPAARLGDEIQHKSFLGALAGAVLGAIVTIAEGCLIMAACATGPYALVLVPALMYASYKASDYVEEKQNQLESWINSFCDTDGAINTGSKNVKINGKPAARAAVTLPPPPP
A0A1X3L6D2_ECOLX	Rhs core protein with extension	EAVG_03837	Escherichia coli H420	108	MSEGPGGPQGATAGGTLAMRMLSQQAMVASQMKRAANDKAIAQMLASKKSGPPAARLGDEIQHKSFLGALAGAVLGAIVTIAEGCLIMAACATGPYALVLVPALMYAS
A0A3S7B0S6_ECOLX	Type IV secretion protein Rhs	BOH76_21710	Escherichia coli	108	MSEGPGGPQGATAGGTLAMRMLSQQAMVASQMKRAANDKAIAQMLASKKSGPPAARLGDEIQHKSFLGALAGAVLGAIVTIAEGCLIMAACATGPYALVLVPALMYAS
A0A3L9J1V1_ECOLX	Type IV secretion protein Rhs (Fragment)	EAI42_24315 EAI46_24340	Escherichia coli	521	MSEGPGGPQGATAGGTLAMRMLSQQAMVASQMKRAANDKAIAQMLASKKSGPPAARLGDEIQHKSFLGALAGAVLGAIVTIAEGCLIMAACATGPYALVLVPALMYASYKASDYVEEKQNQLESWINSFCDTDGAINTGSENVNINGKPAARAAVTLPPPPPPGAIPEVPQGEPSWGDIATDLLESAAEKAVPLAKAWGNAVITLTDSNAGFMDRVSAGASLLFPAGPVLMEFATMVGGRGEIKKDVDFPEAGEDTALCDKENKPPRIAQGSSNVFINNQPAARQGDKLECSAAIVGGSPDVFIGGEQVTYLDIQPEFPPWQRMILGGITIASYLLPPAGLLGKLKNLARLGKLGNLLGKSGKLLGAKLGALLGKTGKSLKSIANKVIRWVTDPVDPVT…
A0A3U6AFV0_ECOLX	Type IV secretion protein Rhs (Fragment)	DQF72_26055	Escherichia coli	1092	MSEGPGGPQGATAGGTLAMRMLSQQAMVASQMKRAANDKAIAQMLAAKKSGPPAARLGDEIQHKSFLGALAGAVLGAIVTIAEGCLIMAACATGPYALVLVPALMYASYKASDYVEEKQNQLESWINSFCDTDGAINTGSENVNINGKPAARAAVTLPPPPPPGAIPEVPQGEPSWGDIATDLLESAAEKAVPLAKAWGNAVITLTDSNAGFMDRVSAGASLLFPAGPVLMEFATMVGGRGEIKKEVDFPEAGEDSALCDKENKPPRIAQGSSNVFINNQPAARKGDKLECSAAIVEGSPDVFIGGEQVTYLDIQPEFPPWQRMILGGITIASYLLPPAGLLGKLKNLARLGKLGNLLGKSGKLLGAKLGALLGKTGKSLKSIANKVIRWVTDPVDPVT…
E7SZ24_9ENTR	Rhs-family protein	SGB_02707	Shigella boydii ATCC 9905	1412	MSEGPGGPQGATAGGTLAMRMLSQQAMVASQMKRAANDKAIAQMLASKKSGPPAARLGDEIQHKSFLGALAGAVLGAIVTIAEGCLIMAACATGPYALVLVPALMYASYKASDYVEEKQNQLESWINSFCDTDGAINTGSENVKINGELAARAAVTLPPPPPPGAIPEVPQGEPSWGDIATDLLESAAEKAVPLAKARGNAVITLTDSNAGFMDRVSAGASLLFPAGPVLMEFATMVGGRGEIKKDVDFPEAGENTALCDKENKPPRIAQGSSNVFINNQPAARKGDKLECSAAIVGGSPDVFIGGEQVTYLDIQPEFPPWQRMILGGITIASYLLPPAGLLGKLKNLARLGKLGNLLGKSGKLLGAKLGALLGKTGKSLKSIANKVIRWVTDPVDPVT…
A0A3U1JN57_ECOLX	Type IV secretion protein Rhs (Fragment)	DOE16_25310	Escherichia coli	1127	MSEGPGGPQGATAGGTLAMRMLSQRAMAASQMKRAANDKAIAQMLASKKSGPPAARLGDEIQHKSFLGALAGAVLGAIVTIAEGCLIMAACATGPYALVLVPALMYASYKASDYVEEKQNQLESWINSFCDTDGAINTGSKNVKINGKPAARAAVTLPPPPPPGAIPEVPQGEPSWGDIATDLLESAAEKAVPLAKAWGNAVITLTDSNAGFMDRVSAGASLLFPAGPVLMEFATMVGGRGEIKKDVDFPEAGEDTALCDKENKPPRIAQGSSNVFINNQPAARKGDKLECSAAIVEGSPDVFIGGEQVTYLDIQPEFPPWQRMILGGITIASYLLPPAGLLGKLGNLAKLGKLGNLLGKSGKLLGAKLGALLGKTGNSLKSIANKVIRWVTDPVDPVT…
A0A3U2DKX6_ECOLX	Type IV secretion protein Rhs (Fragment)	DOV01_25980	Escherichia coli	1130	MSEGPGGPQGATAGGTLAMRMLSQRAMAASQMKRAANDKAIAQMLASKKSGPPAARLGDEIQHKSFLGALAGAVLGAIVTIAEGCLIMAACATGPYALVLVPALMYASYKASDYVEEKQNQLESWINSFCDTDGAINTGSKNVKINGKPAARAAVTLPPPPPPGAIPEVPQGEPSWGDIATDLLESAAEKAVPLAKAWGNAVITLTDSNAGFMDRVSAGASLLFPAGPVLMEFATMVGGRGEIKKDVDFPEAGEDTALCDKENKPPRIAQGSSNVFINNQPAARKGDKLECSAAIVEGSPDVFIGGEQVTYLDIQPEFPPWQRMILGGITIASYLLPPAGLLGKLGNLAKLGKLGNLLGKSGKLLGAKLGALLGKTGNSLKSIANKVIRWVTDPVDPVT…
A0A3U1KWE6_ECOLX	Type IV secretion protein Rhs (Fragment)	DOS47_26340	Escherichia coli	1129	MSEGPGGPQGATAGGTLAMRMLSQRAMAASQMKRAANDKAIAQMLASKKSGPPAARLGDEIQHKSFLGALAGAVLGAIVTIAEGCLIMAACATGPYALVLVPALMYASYKASDYVEEKQNQLESWINSFCDTDGAINTGSKNVKINGKPAARAAVTLPPPPPPGAIPEVPQGEPSWGDIATDLLESAAEKAVPLAKAWGNAVITLTDSNAGFMDRVSAGASLLFPAGPVLMEFATMVGGRGEIKKDVDFPEAGEDTALCDKENKPPRIAQGSSNVFINNQPAARKGDKLECSAAIVEGSPDVFIGGEQVTYLDIQPEFPPWQRMILGGITIASYLLPPAGLLGKLGNLAKLGKLGNLLGKSGKLLGAKLGALLGKTGNSLKSIANKVIRWVTDPVDPVT…
A0A3Y4VI74_ECOLX	Type IV secretion protein Rhs (Fragment)	EHV81_06275	Escherichia coli	1130	MSEGPGGPQGATAGGTLAMRMLSQRAMAASQMKRAANDKAIAQMLASKKSGPPAARLGDEIQHKSFLGALAGAVLGAIVTIAEGCLIMAACATGPYALVLVPALMYASYKASDYVEEKQNQLESWINSFCDTDGAINTGSKNVKINGKPAARAAVTLPPPPPPGAIPEVPLGEPSWGDIATDLLESAAEKAVPLAKAWGNAVITLTDSNAGFMDRVSAGASLLFPAGPVLMEFATMVGGRGEIKKDVDFPEAGEDTALCDKENKPPRIAQGSSNVFINNQPAARKGDKLECSAAIVEGSPDVFIGGEQVTYLDIQPEFPPWQRMILGGITIASYLLPPAGLLGKLGNLAKLGKLGNLLGKSGKLLGAKLGALLGKTGNSLKSIANKVIRWVTDPVDPVT…
A0A3T8K1Z4_ECOLX	Type IV secretion protein Rhs (Fragment)	DM962_26535	Escherichia coli	1130	MSEGPGGPQGATAGGTLAMRMLSQRAMAASQMKRAANDKAIAQMLASKKSGPPAARLGDEIQHKSFLGALAGAVLGAIVTIAEGCLIMAACATGPYALVLVPALMYASYKASDYVEEKQNQLESWINSFCDTDGAINTGSKNVKINGKPAARAAVTLPPPPPPGAIPEVPQGEPSWGDIATDLLESAAEKAVPLAKAWGNAVITLTDSNAGFMDRVSAGASLLFPAGPVLMEFATMVGGRGEIKKDVDFPEAGEDTALCDKENKPPRIAQGSSNVFINNQPAARKGDKLECSAAIVEGSPDVFIGGEQVTYLDIQPEFPPWQRMILGGITIASYLLPPAGLLGKLGNLAKLGKLGNLLGKSGKLLGAKLGALLGKTGNSLKSIANKVIRWVTDPVDPVT…
A0A4C4JVD0_ECOLX	Type IV secretion protein Rhs	BvCmsHHP056_03090	Escherichia coli	436	MSEGPGGPQGATAGGTLAMRMLSQQAMVASQMKRAANDKAIAQMLAAKKSGPPAARLGDEIQHKSFLGALAGAVLGAIVTIAEGCLIMAACATGPYALVLVPALMYASYKASDYVEEKQNQLESWINSFCDTDGAINTGSENVKINGELAARAAVTLPPPPPPGAIPEVPQGEPSWGDIATDLLESAAEKAVPLAKAWGNAVITLTDSNAGFMDRVSAGASLLFPAGPVLMEFATMVGGRGEIKKEVDFPEAGEDTALCDKENKPPRIAQGSSNVFINNQPAARKGDKLECSAAIVGGSPDVFIGGEQVTYLDIQPEFPPWQRMILGGITIASYLLPPAGLLGKLKNLARLGKLGNLLGKSGKLLGAKLGALLGKTGKSLKSIANKVIRWVTDPVDPVT…
A0A4R4CRQ9_9BURK	Uncharacterized protein	C5O80_11170	Burkholderia sp. SRS-46	1416	MFEAARVTDPIEHTSALTGFLIGAVIGIALIAAVAFATFTCGFGVALLAGMAAGLGASGILSLGEAIGKMFTSTSGAIVSGSPNVFINGRPAAYATLSGVMCDKHNPVPLVAQGSTNVFINGRPAARKDDKITCGATIGDGSHDTFLHGGTQTYLPVDDEVPPWLRTAVDWAFALAGLVGGLAGLAKAAGGLSRAVLPCAAKFVGSFVLGEVISRYVAGPAISRAIGGLFGNPVDVTTGRKVLLAEAETDCVIPSPLPVRIQRFYSSSLDQVGTLGRGWVLPWDLRLQARDGRLWYTDAQGRESGFPLVRSGQSSFSDSEQRYLTCTPDGRYVLHDVGETYCDFGRLDPDSDRIAWVRRIEDQAGQWMQFERDSQGRVREILTCGGIQAVLDYEPVHGR…
A0A1X0YX92_ECOLX	Uncharacterized protein (Fragment)	BHS81_02905	Escherichia coli	151	MRMLSQQAMVASQMKRAANDKAIAQMLASKKSGPPAARLGDEIQHKSFLGALAGAVLGAIVTIAEGCLIMAACATGPYALVLVPALMYASYKASDYVEEKQNQLESWINSFCDTDGAINTGSENVKINGELAARAAVTLPPPPPPGAIPEV
A0A2T3T1C9_ECOLX	Type IV secretion protein Rhs (Fragment)	C7B08_21085	Escherichia coli	1160	MSEGPGGPQGATAGGTLAMRMLSQQAMVASQMKRAANDKAIAQMLASKKSGPPAARLGDEIQHKSFLGALAGAVLGAIVTIAEGCLIMAACATGPYALVLVPALMYASYKASDYVEEKQNQLESWINSFCDTDGAINTGSENVNINGKPAARAAVTLPPPPPPGAIPEIPQGEPSWGDIATDLLESAAEKAVPLAKAWGNAVITLTDSNAGFMDRVSAGASLLFPAGPVLMEFATMVGGRGEIKKDVDFPEAGEDTALCDKENKPPRIAQGSSNVFINNQPAARKGDKLECSAAIVEGSPDVFIGGEQVTYLDIQPEFPPWQRMILGGITIASYLLPPAGLLGKLKNLARLGKLGNLLGKSGKLLGAKLGALLGKTGKSLKSIANKVIRWVTDPVDPVT…
F4TDM5_ECOLX	Putative RHS protein (Fragment)	ECJG_00001	Escherichia coli M718	1148	MSEGPGGPQGATAGGTLAMRMLSQQAMVASQMKRAANNKAIAQMLASKKSGPPAARLGDEIQHKSFLGALAGAVLGAIVTIAEGCLIMAACATGPYALVLVPALMYASYKASDYVEEKQNQLESWINSFCDTDGAINTGSENVKINGKPAARAAVTLPSPPPPEAIPEASQGEHSWGDMALDLLESAAEKAAPLAKSWGNAVITLTDSNASFMDRVSAGASLLFPAGPVLMEFATMVGGRGEIKKDVDFPEAGEDTALCDKENKPPRIAQGSSNVFINNQPAARKGDKLECSAAIVEGSPDVFIGGEQVTYLDIQPEFPPWQRMILGGITIASYLLPPAGLLGKLGNLAKLGKLGNLLGKSGKLLGAKLGALLGKTGKSLKSIANKVIRWVTDPVDPVT…
A0A3T5TWL8_ECOLX	Type IV secretion protein Rhs (Fragment)	DL917_25775	Escherichia coli	1153	MSEGPGGPQGATAGGTLAMRMLSQRAMAASQMKRAANDKAIAQMLASKKSGPPAARLGDEIQHKSFLGALAGAVLGAIVTIAEGCLIMAACATGPYALVLVPALMYASYKASDYVEEKQNQLESWINSFCDTDGAINTGSKNVKINGKPAARAAVTLPPPPPPGAIPEVPQGEPSWGDIATDLLESAAEKAVPLAKAWGNAVITLTDSNAGFMDRVSAGASLLFPAGPVLMEFATMVGGRGEIKKDVDFPEAGEDTALCDKENKPPRIAQGSSNVFINNQPAARKGDKLECSAAIVEGSPDVFIGGEQVTYLDIQPEFPPWQRMILGGITIASYLLPPAGLLGKLGNLAKLGKLGNLLGKSGKLLGAKLGALLGKTGNSLKSIANKVIRWVTDPVDPVT…
A0A3X9LIQ2_ECOLX	Type IV secretion protein Rhs (Fragment)	DMI14_25240 EHV50_09085	Escherichia coli	1153	MSEGPGGPQGATAGGTLAMRMLSQRAMAASQMKRAANDKAIAQMLASKKSGPPAARLGDEIQHKSFLGALAGAVLGAIVTIAEGCLIMAACATGPYALVLVPALMYASYKASDYVEEKQNQLESWINSFCDTDGAINTGSKNVKINGKPAARAAVTLPPPPPPGAIPEVPQGEPSWGDIATDLLESAAEKAVPLAKAWGNAVITLTDSNAGFMDRVSAGASLLFPAGPVLMEFATMVGGRGEIKKDVDFPEAGEDTALCDKENKPPRIAQGSSNVFINNQPAARKGDKLECSAAIVEGSPDVFIGGEQVTYLDIQPEFPPWQRMILGGITIASYLLPPAGLLGKLGNLAKLGKLGNLLGKSGKLLGAKLGALLGKTGNSLKSIANKVIRWVTDPVDPVT…
A0A4V5IDX1_ECOLX	Type IV secretion protein Rhs (Fragment)	C9Z29_24540	Escherichia coli	1180	MSEGPGGPQGATAGGTLAMRMLSQRAMAASQMKRAANDKAIAQMLASKKSGPPAARLGDEIQHKSFLGALAGAVLGAIVTIAEGCLIMAACATGPYALVLVPALMYASYKASDYVEEKQNQLESWINSFCDTDGAINTGSKNVKINGKPAARAAVTLPPPPPPGAIPEVPQGEPSWGDIATDLLESAAEKAVPLAKAWGNAVITLTDSNAGFMDRVSAGASLLFPAGPVLMEFATMVGGRGEIKKDVDFPEAGEDTALCDKENKPPRIAQGSSNVFINNQPAARKGDKLECSAAIVEGSPDVFIGGEQVTYLDIQPEFPPWQRMILGGITIASYLLPPAGLLGKLGNLAKLGKLGNLLGKSGKLLGAKLGALLGKTGNSLKSIANKVIRWVTDPVDPVT…
A0A3W2VVZ0_ECOLX	Type IV secretion protein Rhs	D6W07_24270	Escherichia coli	1505	MSEGPGGPQGATAGGTLAMRMLSQQAMVASQMKRAANDKAIAQMLASKKSGPPAARLGDEIQHKSFLGALAGAVLGAIVTIAEGCLIMAACATGPYALVLVPALMYASYKASDYVEEKQNQLESWINSFCDTDGAINTGSENVKINGELAARAAVTLPPPPPPGAIPEVPQGEPSWGDIATDLLESAAEKAVPLAKAWGNAVITLTDSNAGFMDRVSAGASLLFPAGPVLMEFATMVGGRGEIKKEVDFPEAGEDTALCDKENKPPRIAQGSSNVFINNQPAARKGDKLECSAAIVGGSPDVFIGGEQVTYLDIQPEFPPWQRMILGGITIASYLLPPAGLLGKLKNLARLGKLGNLLGKSGKLLGAKLGALLGKTGKSLKSIANKVIRWVTDPVDPVT…
A0A3Y2VDH0_SALET	RHS repeat protein (Fragment)	DS529_21825	Salmonella enterica I	940	MYEAARVDDPIYHTSALAGFLIGAIIGIAIIALAAFALFTCGFLAGLVLGFLADQIASGVLQLGEAIGRSIHHTAGKILTGSENVSTNSRPAARAVLSTVKCDNHIAEKRIAQGAENIYINSQPAARKDDHTECDAVIEDGSPNVFLGGGTQTVLEISSEIPDWLRKVVDVLFVVAGLLGGLAGAWRQAAKLGTKFGTKCAAKFIGGELTGMAVSEAISGLFSNPVDVTTGQKILLPETDFTLPGRLPVACSRFYASHLETVGLLGRGWRLNWETSLREDDEHLTLTGVQGRELRYPKTMLTPGHQIFDPEEQLYLSRLHDGRYVLHYTDRSYYVFGDFDSDGMAYLRFMETPHRQRIVFGHEGGRLVRIASSSGHHLLLHRTQTPAGERLSRIELVQG…
A0A3T3H708_ECOLX	Type IV secretion protein Rhs (Fragment)	DLU67_26830	Escherichia coli	1164	MSEGPGGPQGATAGGTLAMRMLSQQAMVASQMKRAANDKAIAQMLAAKKSGPPAARLGDEIQHKSFLGALAGAVLGAIVTIAEGCLIMAACATGPYALVLVPALMYASYKASDYVEEKQNQLESWINSFCDTDGAINTGSENVNINGKPAARAAVTLPPPPPPGAIPEVPQGEPSWGDIATDLLESAAEKAVPLAKAWGNAVITLTDSNAGFMDRVSAGASLLFPAGPVLMEFATMVGGRGEIKKEVDFPEAGEDSALCDKENKPPRIAQGSSNVFINNQPAARKGDKLECSAAIVEGSPDVFIGGEQVTYLDIQPEFPPWQRMILGGITIASYLLPPAGLLGKLKNLARLGKLGNLLGKSGKLLGAKLGALLGKTGKSLKSIANKVIRWVTDPVDPVT…
A0A377C3M6_ECOLX	Rhs core protein	wapA_2 NCTC9969_03810	Escherichia coli	1619	MSEGPGGPQGATAGGTLAMRMLSQQAMVASQMKRAANDKAIAQMLASKKSGPPAARLGDEIQHKSFLGALAGAVLGAIVTIAEGCLIMAACATGPYALVLVPALMYASYKASDYVEEKQNQLESWINSFCDTDGAINTGSENVKINGKPAARAAVTLPPPPPPGAIPEVPQGEPSWGDIATDLLESAAEKAVPLAKAWGNAVITLTDSNAGFMDRVSAGASLLFPSGPVLMEFATMVGGRGEIKKDVDFPEAGEDTALCDKENKPPRIAQGSSNVFINNQPAARQGDKLECSAAIVEGSPDVFIGGEQVTYLDIQPEFPPWQRMILGGITIASYLLPPAGLLGKLGNLAKLGKLGNLLGKSGKLLGAKLGALLGKTGKSLKSIANKVIRWVTDPVDPVT…
A0A369FGF6_ECOLX	Type IV secretion protein Rhs (Fragment)	DTL43_27020	Escherichia coli	1179	MSEGPGGPQGATAGGTLAMRMLSQQAMVASQMKRAANDKAIAQMLAAKKSGPPAARLGDEIQHKSFLGALAGAVLGAIVTIAEGCLIMAACATGPYALVLVPALMYASYKASDYVEEKQNQLESWINSFCDTDGAINTGSENVNINGKPAARAAVTLPPPPPPGAIPEIPQGEPSWGDIATDLLESAAEKAVPLAKAWGNAVITLTESNAGFMDRVSAGASLLFPAGPVLMEFATMVGGRGEIKKDVDFPEAGEDTALCDKENKPPRIAQGSSNVFINNQPAARKGDKLECSAAIVEGSPDVFIGGEQVTYLDIQPEFPPWQRMILGGITIASYLLPPAGLLGKLGNLAKLGKLGNLLGKSGKLLGAKLGALLGKTGKSLKSIANKVIRWVTDPVDPVT…
A0A1X3J4J6_ECOLX	Putative RHS protein	ECXG_04548	Escherichia coli TA447	1628	MSEGPGGPQGATAGGTLAMRMLSQQAMVASQMKRAVNDKAIAQMLASKKSGPPAARLGDEIQHKSFLGALAGAVLGAIVTIAEGCLIMAACATGPYALVLVPALMYASYKASDYVEEKQNQLESWINSFCDTDGAINTGSENVKINGKPAARAAVTLPPPPPPGAIPEVPQGEPSWGDIATDLLESAAEKAVPLAKAWGNAVITLTDSNASFMDRVSAGASLLFPSGPVLMEFATMVGGRGEIKKDVDFPEAGEDTALCDKENKPPRIAQGSSNVFINNQPAARQGDKLECSAAIVEGSPDVFIGGEQVTYLDIQPEFPPWQRMILGGITIASYLLPPAGLLGKLGNLAKLGKLGKLGNLLGKSGKLLGAKLGALLGRTKNALKSAYNVVKKFIKDPVD…
A0A3W5XXA9_ECOLX	Type IV secretion protein Rhs	EAN77_09575	Escherichia coli	1609	MSEGPGGPQGATAGGTLAMRMLSQQAMVASQMKRAANDKAIAQMLASKKSGPPAARLGDEIQHKSFLGALAGAVLGAIVTIAEGCLIMAACATGPYALVLVPALMYASYKASDYVEEKQNQLESWINSFCDTDGAINTGSENVKINGKPAARAAVTLPPPPPPGAIPEVPQGEPSWGDIATDLLESAAEKAVPLAKAWGNAVITLTDSNASFMDRVSAGASLLFPAGPVLMEFATMVGGRGEIKKDVDFPEAGEDTALCDKENKPPRIAQGSSNVFINNQPAARQGDKLECSAAIVEGSPDVFIGGEQVTYLDIQPEFPPWQRMILGGITIASYLLPPAGLLGKLGNLAKLGKLGNLLGKSGKLLGAKLGALLGKTGKSLKSIANKVIRWVTDPVDPVT…
A0A3U0P311_ECOLX	Type IV secretion protein Rhs (Fragment)	DN808_25655 DP277_07425	Escherichia coli	1197	MSEGPGGPQGATAGGTLAMRMLSQQAMVASQMKRAANDKAIAQMLAAKKSGPPAARLGDEIQHKSFLGALAGAVLGAIVTIAEGCLIMAACATGPYALVLVPALMYASYKASDYVEEKQNQLESWINSFCDTDGAINTGSENVNINGKPAARAAVTLPPPPPPGAIPEVPQGEPSWGDIATDLLESAAEKAVPLAKAWGNAVITLTDSNAGFMDRVSAGASLLFPAGPVLMEFATMVGGRGEIKKEVDFPEAGEDSALCDKENKPPRIAQGSSNVFINNQPAARKGDKLECSAAIVEGSPDVFIGGEQVTYLDIQPEFPPWQRMILGGITIASYLLPPAGLLGKLKNLARLGKLGNLLGKSGKLLGAKLGALLGKTGKSLKSIANKVIRWVTDPVDPVT…
A0A479FEK8_ECOLX	Type IV secretion protein Rhs	BvCmsKSNP073_00388 BvCmsKSNP081_03249 DEO19_10445	Escherichia coli	1505	MSEGPGGPQGATAGGTLAMRMLSQQAMVASQMKRAANDKAIAQMLASKKSGPPAARLGDEIQHKSFLGALAGAVLGAIVTIAEGCLIMAACATGPYALVLVPALMYASYKASDYVEEKQNQLESWINSFCDTDGAINTGSENVKINGELAARAAVTLPPPPPPGAIPEVPQGEPSWGDIATDLLESAAEKAVPLAKAWGNAVITLTDSNAGFMDRVSAGASLLFPAGPVLMEFATMVGGRGEIKKEVDFPEAGEDTALCDKENKPPRIAQGSSNVFINNQPAARKGDKLECSAAIVGGSPDVFIGGEQVTYLDIQPEFPPWQRMILGGITIASYLLPPAGLLGKLKNLARLGKLGNLLGKSGKLLGAKLGALLGKTGKSLKSIANKVIRWVTDPVDPVT…
A0A3T8XYJ8_ECOLX	Type IV secretion protein Rhs (Fragment)	DMI31_09315 DNC87_06480 DNQ58_12155 DQN09_25175	Escherichia coli	1197	MSEGPGGPQGATAGGTLAMRMLSQQAMVASQMKRAANDKAIAQMLAAKKSGPPAARLGDEIQHKSFLGALAGAVLGAIVTIAEGCLIMAACATGPYALVLVPALMYASYKASDYVEEKQNQLESWINSFCDTDGAINTGSENVNINGKPAARAAVTLPPPPPPGAIPEVPQGEPSWGDIATDLLESAAEKAVPLAKAWGNAVITLTDSNAGFMDRVSAGASLLFPAGPVLMEFATMVGGRGEIKKEVDFPEAGEDSALCDKENKPPRIAQGSSNVFINNQPAARKGDKLECSAAIVEGSPDVFIGGEQVTYLDIQPEFPPWQRMILGGITIASYLLPPAGLLGKLKNLARLGKLGNLLGKSGKLLGAKLGALLGKTGKSLKSIANKVIRWVTDPVDPVT…
A0A3T9QTV8_ECOLX	Type IV secretion protein Rhs (Fragment)	DNX19_26880	Escherichia coli	1197	MSEGPGGPQGATAGGTLAMRMLSQQAMVASQMKRAANDKAIAQMLAAKKSGPPAARLGDEIQHKSFLGALAGAVLGAIVTIAEGCLIMAACATGPYALVLVPALMYASYKASDYVEEKQNQLESWINSFCDTDGAINTGSENVNINGKPAARAAVTLPPPPPPGAIPEVPQREPSWGDIATDLLESAAEKAVPLAKAWGNAVITLTDSNAGFMDRVSAGASLLFPAGPVLMEFATMVGGRGEIKKEVDFPEAGEDSALCDKENKPPRIAQGSSNVFINNQPAARKGDKLECSAAIVEGSPDVFIGGEQVTYLDIQPEFPPWQRMILGGITIASYLLPPAGLLGKLKNLARLGKLGNLLGKSGKLLGAKLGALLGKTGKSLKSIANKVIRWVTDPVDPVT…
A0A3T6JPE4_ECOLX	Type IV secretion protein Rhs (Fragment)	DLW38_24250 DMI21_26560	Escherichia coli	1197	MSEGPGGPQGATAGGTLAMRMLSQQAMVASQMKRAANDKAIAQMLAAKKSGPPAARLGDEIQHKSFLGALAGAVLGAIVTIAEGCLIMAACATGPYALVLVPALMYASYKASDYVEEKQNQLESWINSFCDTDGAINTGSENVNINGKPAARAAVTLPPPPPPGAIPEVPQGEPSWGDIATDLLESAAEKAVPLAKAWGNAVITLTDSNAGFMDRVSAGASLLFPAGPVLMEFATMVGGRGEIKKEVDFPEAGEDSALCDKENKPPRIAQGSSNVFINNQPAARKGDKLECSAAIVEGSPDVFIGGEQVTYLDIQPEFPPWQRMILGGITIASYLLPPAGLLGKLKNLARLGKLGNLLGKSGKLLGAKLGALLGKTGKSLKSIANKVIRWVTDPVDPVT…
A0A3U0PHS6_ECOLX	Type IV secretion protein Rhs	DN627_24200	Escherichia coli	1625	MSEGPGGPQGATAGGTLAMRMLSQQAMVASQMKRAANDKAIAQMLASKKSGPPAARLGDEIQHKSFLGALAGAVLGAIVTIAEGCLIMAACATGPYALVLVPALMYASYKASDYVEEKQNQLESWINSFCDTDGAINTGSENVKINGKPAARAAVTLPPPPPPGAIPEVPQGEPSWGDIATDLLESAAEKAVPLAKAWGNAVITLTDSNASFMDRVSAGASLLFPSGPVLMEFATMVGGRGEIKKDVDFPEAGEDTALCDKENKPPRIAQGSSNVFINNQPAARQGDKLECSAAIVEGSPDVFIGGEQVTYLDIQPEFPPWQRMILGGITIASYLLPPAGLLGKLGNLAKLGKLGNLLGKSGKLLGAKLGALLGKTGKSLKSIANKVIRWVTDPVDPVT…
A0A3L4JRT9_ECOLX	Type IV secretion protein Rhs	D9E35_07595	Escherichia coli	1625	MSEGPGGPQGATAGGTLAMRMLSQQAMVASQMKRAANDKAIAQMLASKKSGPPAARLGDEIQHKSFLGALAGAVLGAIVTIAEGCLIMAACATGPYALVLVPALMYASYKASDYVEEKQNQLESWINSFCDTDGAINTGSENVKINGKPAARAAVTLPPPPPPGAIPEVPQGEPSWGDIATDLLESAAEKAVPLAKAWGNAVITLTDSNASFMDRVSAGASLLFPSGPVLMEFATMVGGRGEIKKDVDFPEAGEDTALCDKENKPPRIAQGSSNVFINNQPAARQGDKLECSAAIVEGSPDVFIGGEQVTYLDIQPEFPPWQRMILGGITIASYLLPPAGLLGKLGNLAKLGKLGNLLGKSGKLLGAKLGALLGKTGKSLKSIANKVIRWVTDPVDPVT…
A0A3Z8YI51_ECOLX	Type IV secretion protein Rhs	D9D63_03690	Escherichia coli	1625	MSEGPGGPQGATAGGTLAMRMLSQQAMVASQMKRAANDKAIAQMLASKKSGPPAARLGDEIQHKSFLGALAGAVLGAIVTIAEGCLIMAACATGPYALVLVPALMYASYKASDYVEEKQNQLESWINSFCDTDGAINTGSENVKINGKPAARAAVTLPPPPPPGAIPEVPQGEPSWGDIATDLLESAAEKAVPLAKAWGNAVITLTDSNASFMDRVSAGASLLFPSGPVLMEFATMVGGRGEIKKDVDFPEAGEDTALCDKENKPPRIAQGSSNVFINNQPAARQGDKLECSAAIVEGSPDVFIGGEQVTYLDIQPEFPPWQRMILGGITIASYLLPPAGLLGKLGNLAKLGKLGNLLGKSGKLLGAKLGALLGKTGKSLKSIANKVIRWVTDPVDPVT…
J4JIF2_9BURK	RHS protein	BURMUCF2_B0584	Burkholderia multivorans CF2	1410	MYEAARVTDPIEHTSALAGFLVGAVLGIALIAAVAFATFTCGFGVALLAGMAAGIGAQGLLSLGEAIGKMFSSQSGNIITGSTNVYVNGKPAAYATLSGVACSKHNPVPLVAQGSTNIFINNRPAARKDDKITCGATIGGGSHDTFFHGGTQTYLPVDDEVPPWLRTATDWAFALAGLVGGLGGLLKAAGGLSRAVLPCAAKFIGGYVLGEAVGRYVAGPAINKAIGGMFGNPVDVTTGRKILLAESEIDYVIPSPIPVAIKRFYSSSLDYVGTLGRGWVLPWELRLQARDGRLWYTDAQGRESGFPLLRTGQAAFSEADQRYLTCTPDGRYILHDIGETYYDFGRYEPDSGRIAWVRRIEDQAGQWYQFERDSRGRVTEIQTCGGLQAALDYEPEHGR…
A0A2S9MJV6_9BURK	Uncharacterized protein	C6Q15_18685 C6Q28_24175	Burkholderia multivorans	1410	MYEAARVTDPIEHTSALAGFLVGAVLGIALIAAVAFATFTCGFGVALLAGMAAGIGAQGLLSLGEAIGKMFSSQSGNIITGSTNVYVNGKPAAYATLSGVACSKHNPVPLVAQGSTNIFINNRPAARKDDKITCGATIGGGSHDTFFHGGTQTYLPVDDEVPPWLRTATDWAFALAGLVGGLGGLLKAAGGLSRAVLPCAAKFIGGYVLGEAVGRYVAGPAINKAIGGMFGNPVDVTTGRKILLAESEIDYVIPSPIPVAIKRFYSSSLNYVGTLGRGWVLPWELRLQARDGRLWYTDAQGRESGFPLLRTGQAAFSEADQRYLTCTPDGRYILHDIGETYYDFGRYEPDSGRIAWVRRIEDQAGQWYQFERDSRGRVTEIQTCGGLQAALDYEPEHGR…
A0A0H3KXX7_BURM1	Rhs family protein	BMULJ_05445	Burkholderia multivorans (strain ATCC 17616 / 249)	1410	MYEAARVTDPIEHTSALAGFLVGAVLGIALIAAVAFATFTCGFGVALLAGMAAGIGAQGLLSLGEAIGKMFSSQSGNIITGSTNVYVNGKPAAYATLSGVACSKHNPVPLVAQGSTNIFINNRPAARKDDKITCGATIGGGSHDTFFHGGTQTYLPVDDEVPPWLRTATDWAFALAGLVGGLGGLLKAAGGLSRAVLPCAAKFIGGYVLGEAVGRYVAGPAINKAIGGMFGNPVDVTTGRKILLAESEIDYVIPSPIPVAIKRFYSSSLNYVGTLGRGWVLPWELRLQARDGRLWYTDAQGRESGFPLLRTGQAAFSEADQRYLTCTPDGRYILHDIGETYYDFGRYEPDSGRIAWVRRIEDQAGQWYQFERDSRGRVTEIQTCGGLQAALDYEPEHGR…
A0A3Z1Z508_ECOLX	Type IV secretion protein Rhs	EBE00_23925	Escherichia coli	1505	MSEGPGGPQGATAGGTLAMRMLSQQAMVASQMKRAANDKAIAQMLASKKSGPPAARLGDEIQHKSFLGALAGAVLGAIVTIAEGCLIMAACATGPYALVLVPALMYASYKASDYVEEKQNQLESWINSFCDTDGAINTGSENVKINGELAARAAVTLPPPPPPGAIPEVPQGEPSWGDIATDLLESAAEKAVPLAKAWGNAVITLTDSNAGFMDRVSAGASLLFPAGPVLMEFATMVGGRGEIKKEVDFPEAGEDTALCDKENKPPRIAQGSSNVFINNQPAARKGDKLECSAAIVGGSPDVFIGGEQVTYLDIQPEFPPWQRMILGGITIASYLLPPAGLLGKLKNLARLGKLGNLLGKSGKLLGAKLGALLGKTGKSLKSIANKVIRWVTDPVDPVT…
A0A108C601_9BURK	Uncharacterized protein	WM15_06000	Burkholderia ubonensis	1412	MYEAARVTDPIEHTSALAGFLVGAVLGIALIAAVAFATFTCGFGVALLAGMAAGIGAQGLLSLGEAIGKMFSSPSGAISTGSSNVFVNGKPAAFATLSGVACSKHNPIPLVAQGSTNIFINNRPAARKDDKITCGATIGDGSNDTFFHGGTQTYLPVDDEVPPWLRTGTEWAFALAGLVGGLGGLLKQAGGLSRAVLPCAAKFIGGFVLGEAVGRYVAGPAINRAIGGMFGNPVDVTTGRKILLAESEIDYVIPSPMPVAIKRFYASSLDYVGTLGRGWVLPWELRLHARDGRLWFTDAQGRESGFPLLRPGQAAFSEADQRYLTCAPDGRYILHDVGETYYDFGRYDPDSGRIGWVRRIEDQAGQWCQFERDSRGRVTEIQTCGGLQAVLDYEPEHGR…
A0A3L4Y4V8_ECOLX	Type IV secretion protein Rhs	D9I87_25895	Escherichia coli	1599	MSEGPGGPQGATAGGTLAMRMLSQQAMVASQMKRAANDKAIAQMLASKKSGPPAARLGDEIQHKSFLGALAGAVLGAIVTIAEGCLIMAACATGPYALVLVPALMYASYKASDYVEEKQNQLESWINSFCDTDGAINTGSENVKINGKPAARAAVTLPPPPPPGAIPEVPQGEPSWGDIATDLLESAAEKAVPLAKAWGNAVITLTDSNASFMDRVSAGASLLFPSGPVLMEFATMVGGRGEIKKDVDFPEAGEDTALCDKENKPPRIAQGSSNVFINNQPAARQGDKLECSAAIVEGSPDVFIGGEQVTYLDIQPEFPPWQRMILGGITIASYLLPPAGLLGKLGNLAKLGKLGNLLGKSGKLLGAKLGALLGKTGKSLKSIANKVIRWVTDPVDPVT…
A0A3M4KWW7_PSEA0	Cell-wall associated Rhs protein with YD-repeats and PAAR motif (Fragment)	ALQ05_05213	Pseudomonas amygdali pv. mori	220	MGLPHCFFCSGLAGVGAMFEAARFGDEISHSSALGGFLIGAVLGIALIATVAIATFTCGFGVALLAGLAAGVGGSLLTAAGEAIGSMFSSPSGTILTASPNVYINNRKAAHVEKSIGACEKHPGPIRIAEGSTNVFINSVAAARKGDKLTCGATISSGSNNVFIGGGRYRYLPVDDEIPGWLRTTVDVLMAVAGAAGGIAQLIKAGTQAGMKAVLPCAMK
A0A095EL21_BURCE	RHS repeat-associated core domain protein	DM42_7342	Burkholderia cepacia (Pseudomonas cepacia)	1399	MYEAARVTDPIDHTSALAGFLVGAVLGIALIAAVAFATFTCGFGVALLAGMMAGIGAQALLSIGESIGKMFSSQSGNIITGSPDVYVNSLSAAYATLSGVACSKHNPIPLVAQGSTNIFINGRPAARKDDKITCGATIGDGSHDTFFHGGTQTYLPVEDEVPPWLRTATEWAFVLAGLVGGLGGLLKQAGGLSRAVLPCAAKFIGGYVLGEAFGRYVAGPAINKALGGMFGNPVDVTTGRKILLAESETDFVIPSPMPVAIKRFYSSSIDYAGTLGRGWVAPWELRLHARDGRLWYTDAQGRESGFPMLRAGQAAFSEAEQRYLTCTPDGRYILHDIGETYYDFGQYEPDSGRIAWVRRIEDQAGQWCQFERDSRGRVAEILTCGGLNAVLDYEQEHGR…
A0A1W0YZE8_9BURK	RHS repeat-associated core domain protein	UA18_05974	Burkholderia multivorans	1415	MYEAARVTDPIEHTSALAGFLVGAVLGIALIAAVAFATFTCGFGVALLAGMAAGIGAQGLLSLGEAIGKMFSSQSGNIITGSTNVYVNGKPAAYATLSGVACSKHNPVPLVAQGSTNIFINNRPAARKDDKITCGATIGGGSHDTFFHGGTQTYLPVDDEVPPWLRTATDWAFALAGLVGGLGGLLKAAGGLSRAVLPCAAKFIGGYVLGEAVGRYVAGPAINKAIGGMFGNPVDVTTGRKILLAESEIDYVIPSPIPVAIKRFYSSSLDYVGTLGRGWVLPWELRLQARDGRLWYTDAQGRESGFPLLRTGQAAFSEAEQRYLTCTPDGRYILHDIGETYYDFGRYEPDSGRIAWVRRIEDQAGQWYQFERDSRGRVTEIQACGGLQAALDYEPEHGR…
A0A3G3L221_BURGA	Uncharacterized protein	EDD84_00665	Burkholderia gladioli (Pseudomonas marginata) (Phytomonas marginata)	1424	MYEAARVTDPIEHTSALAGFLVGAVLGIALIAAVAFATFTCGFGVALLAGMAAGIGAQVLLSLGESIGKMFSSQSGAITLGSPNVYVNGKQAAYATLSSVTCSKHNPVPLVAQGSTNIFINGKPAARKDDKITCGATISDGSHDTYFHGGTQTCLPIDDEVPPWLRTATDWAFALAGLVGGLGGLLKEAGGLSRAVMPCAAKFIGGYVLGEAASRYVLGPAINSAIGGMFGNPVDVTTGRKILPAESETDYVVPSPMPVVIRRFYSSDLDYVGTLGRGWVLPWELRLHARDGRLWYTDAQGRESGFPILKPGQAAFSEADQRYLTCTPDGRYILHDVGETYYDFGRYEPGSGRIGWVRRIEDQAGQWCQFERDSRGRVREIQTCGGLLAVLDYEPEHER…
A0A560UYE9_9BURK	RHS repeat-associated protein	FBX98_114251	Burkholderia sp. SJZ115	1425	MYEAARVTDPIEHTSALAGFLVGAVLGIALIAAVAFATFTCGFGVALLAGMAAGIGAQVLLSLGESIGKMFSSQSGAITLGSPNVYVNGKQAAYATLSSVTCSKHNPTPLVAQGSTNIFINGKPAARKDDKITCGAAISDGSHDTYFHGGIQTCLPIDDEVPPWLRTATDWAFALAGLVGGLGGLLKEAGGLSHAVMPCAAKFIGGYVLGEAASRYVIGPAINSAIGGMFGNPVDVTTGRKILPAESETDYVVPSPMPVAIRRFYSSDLDYVGTLGRGWVLPWELRLNARDGRLWYTDAQGRESGFPILKPGQAAFSEADQRYLTCTPDGRYILHDVGETYYDFGRYEPGSGRIGWVRRIEDQAGQWCQFERDSRGRVREIQTCGGLLAVLDYEPEHER…
A0A228Q5L7_9BURK	Uncharacterized protein	CFB46_20605	Burkholderia sp. HI2761	1412	MYEAARVTDPIDHTSALAGFLVGAVLGIALIAAVAFATFTCGFGVALLAGMMAGIGAQALLSIGESIGKMFSSQSGNIITGSPDVYVNSLSAAYATLSGVACSKHNPIPLVAQGSTNIFINGRPAARKDDKITCGATIGDGSHDTFFHGGTQTYLPVDDEVPPWLRTATEWAFVLAGLVGGLGGLLKQAGGLSRAVLPCAAKFIGGYVLGEAFGRYVAAPAINKALGGMFGNPVDVTTGRKILLAESETDFVIPSPMPVAIKRFYSSSIDYAGTLGRGWVAPWELRLHARDGRLWYTDAQGRESGFPLLRAGQAAFSEAEQRYLTCTPDGRYILHDIGETYYDFGRYEPDSGRIAWVRRIEDQAGQWCQFERDSRGRVTEILTCGGLQAVLDYEGEHGR…
B1FG55_9BURK	YD repeat protein	BamIOP4010DRAFT_3015	Burkholderia ambifaria IOP40-10	1412	MYEAARVTDPIDHTSALAGFLVGAVLGIALIAAVAFATFTCGFGVALLAGMMAGIGAQALLSIGESIGKMFSSQSGNIITGSPDVYVNSLSAAYATLSGVACSKHNPIPLVAQGSTNIFINGRPAARKDDKITCGATIGDGSHDTFFHGGTQTYLPVEDEVPPWLRTATEWAFVLAGLVGGLGGLLKQSGGLSRAVLPCAAKFIGGYVLGEAFGRYVAAPAINKALGGMFGNPVDVTTGRKILLAESETDFVIPSPMPVAIKRFYSSSIDYTGTLGRGWVAPWELRLHARDGRLWYTDAQGRESGFPLLRAGQAAFSEAEQRYLTCTPDGRYILHDIGETYYDFGRYEPDSGRIAWVRRIEDQAGQWCQFERDSRGRVTEILTCGGLQAVLDYEGEHGR…
A0A071MID5_9BURK	Uncharacterized protein	DT99_06265	Burkholderia cenocepacia	1413	MYEAARVTDPIDHTSALAGFLVGAVLGIALIAAVAFATFTCGFGVALLAGMMAGIGAQALLSIGESIGKMFSSQSGNIITGSPDVYVNSMSAAYATLSGVACSKHPPIPLVAQGSTNIFINGLPAARKDDKITCGATIADGSHDTFFHGGTQTYLPVDDEVPPWLRTATDWAFALAGLVGGLGGLLKAAGGMSRAVMPCAAKFIGGYVLGEAVSRYVAGPAINKAIGGMFGNPVDVTTGRKILLAESETDYVIPSPMPVTIQRFYSSTIDYAGTLGRGWVAPWELRLQAREGRLWYTDAQGRESGFPLLRAGQAAFSEAEQRYLTCTPDGRYILHDLGETYYDFGQYDPDSGRIAWVRRIEDQAGQWCQFERDSRGRVTEILTCGGLNAVLAYEPDYGR…
A0A2X1FZA5_9BURK	RHS-family protein	wapA_3 NCTC13227_06358	Burkholderia cenocepacia	1415	MYEAARVTDPIDHTSALAGFLVGAVLGIALIAAVAFATFTCGFGVALLAGMMAGIGAQALLSIGESIGKMFSSQSGNIITGSPDVYVNSLSAAYATLSGVACSKHNPIPLVAQGSTNIFINGRPAARKDDKITCGATIGDGSHDTFFHGGTQTYLPVDDEVPPWLRTATEWAFVLAGLVGGLGGLLKQAGGLSRAVLPCAAKFIGGYVLGEAFGRYVAGPAINKALGGMFGNPVDVTTGRKILLAESETDFVIPSPMPVAIKRFYSSSIDYAGTLGRGWVAPWELRLHARDGRLWYTDAQGRESGFPLLRAGQAAFSEAEQRYLTCTPDGRYILHDIGETYYDFGRYDPDSGRIAWVRRIEDQAGQWCQFERDSRGRVTEILTCGGLNAVLDYEQEHGR…
A0A3N9GQY8_9BURK	Uncharacterized protein	DF039_30790	Burkholderia cenocepacia	1415	MYEAARVTDPIDHTSALAGFLVGAVLGIALIAAVAFATFTCGFGVALLAGMMAGIGAQALLSIGESLGKMFSSQSGNIITGSPDVYVNSLSAAYATLSGVACSKHNPIPLVAQGSTNIFINGRPAARKDDKITCGATIGDGSHDTFFHGGTQTYLPVEDEVPPWLRTATEWAFVLAGLVGGLGGLLKQAGGLSRAVLPCAGKFIGGYVLGEAFGRYVAGPAINKALGGMFGNPVDVTTGRKILLAESETDFVIPSPMPVAIKRFYSSSIDYAGTLGRGWVAPWELRLHARDGRLWYTDAQGRESGFPLLRAGQAAFSDAEQRYLTCTPDGRYILHDIGETYYDFGRYEPDSGRIAWVRRIEDQAGQWCQFERDSRGRVTEILTCGGLNAVLDYEQEHGR…
A0A1G5NRS7_BURVI	RHS repeat-associated core domain-containing protein	SAMN02787148_116112	Burkholderia vietnamiensis	1415	MYEAARVTDPIDHTSALAGFLVGAVLGIALIAAVAFATFTCGFGVALLAGMMAGIGAQALLSIGESIGKMFSSQSGNIITGSPDVYVNSLSAAYATLSGVACSKHNPIPLVAQGSTNIFINGRPAARKDDKITCGATIGDGSHDTFFHGGTQTYLPVEDEVPPWLRTATEWAFVLAGLVGGLGGLLKQAGGLSRAVLPCAAKFIGGYVLGEAFGRYVAGPAINKALGGMFGNPVDVTTGRKILLAESETDFVIPSPMPVAIKRFYSSSIDYAGTLGRGWVAPWELRLHARDGRLWYTDAQGRESGFPLLRAGQAAFSEAEQRYLTCTPDGRYILHDISETYYDFGRYEPDSGRIAWVRRIEDQAGQWCQFERDSRGRVAEILTCGGLNAVLDYEQEHGR…
B4EP57_BURCJ	RHS-family protein	BCAS0663	Burkholderia cenocepacia (strain ATCC BAA-245 / DSM 16553 / LMG 16656 / NCTC 13227 / J2315 / CF5610) (Burkholderia cepacia (strain J2315))	1415	MYEAARVTDPIDHTSALAGFLVGAVLGIALIAAVAFATFTCGFGVALLAGMMAGIGAQALLSIGESIGKMFSSQSGNIITGSPDVYVNSLSAAYATLSGVACSKHNPIPLVAQGSTNIFINGRPAARKDDKITCGATIGDGSHDTFFHGGTQTYLPVDDEVPPWLRTATEWAFVLAGLVGGLGGLLKQAGGLSRAVLPCAAKFIGGYVLGEAFGRYVAGPAINKALGGMFGNPVDVTTGRKILLAESETDFVIPSPMPVAIKRFYSSSIDYAGTLGRGWVAPWELRLHARDGRLWYTDAQGRESGFPLLRAGQAAFSEAEQRYLTCTPDGRYILHDIGETYYDFGRYDPDSGRIAWVRRIEDQAGQWCQFERDSRGRVTEILTCGGLNAVLDYEQEHGR…
A0A3P0P344_9BURK	Uncharacterized protein	DIE14_12775	Burkholderia sp. Bp9017	1415	MYEAARVTDPIDHTSALAGFLVGAVLGIALIAAVAFATFTCGFGVALLAGMMAGIGAQALLSIGESIGKMFSSQSGNIIAGSPDVYVNSLSAAYATLSGVACSKHNPIPLVAQGSTNIFINGRPAARKDDKITCGATIADGSHDTFFHGGTQTYLPVDDEVPPWLRTATEWAFVLAGLVGGLGGLLKQAGGLSRAVMPCATKFIGGYVLGEAVGRYVAGPAINKAIGGLFGNPVDVTTGRKILLADSETDYVIQSPMPVAIKRFYSSGIEYAGTLGRGWVLPWELRLHARDGRLWYTDAQGRESGFPLLRAGQAAFSEAEQRYLTCTPDGRYILHDLGERYYDFGRYDPDSGRIAWVRRIEDQAGQWYQFERDSRGRVSEILTCGGLQAVLDYEQEHGR…
A0A109EEN8_9BURK	Uncharacterized protein	AS149_32345	Burkholderia cenocepacia	1415	MYEAARVTDPIDHTSALAGFLVGAVLGIALIAAVAFATFTCGFGVALLAGMMAGIGAQALLSIGESIGKMFSSQSGNIITGSPDVYVNSLSAAYATLSGVACSKHNPIPLVAQGSTNIFINGRPAARKDDKIKCGATISGGSHDTFFHGGTQTYLPVDDEVPPWLRTATEWAFVLAGLVGGLGGLLKQAGGLSRAVLPCAAKFIGGYVLGEAFGRYVAGPAINKALGGMFGNPVDVTTGRKILLAESETDFVIPSPMPVAIKRFYSSSIDYAGTLGRGWVAPWELRLHARDGRLWYTDAQGRESGFPLLRAGQAAFSEAEQRYLTCTPDGRYILHDIGETYYDFGRYEPDSGRIAWVRRIEDQAGQWCQFERDSRGRVTEILTCGGLNAVLDYEQEHGR…
A0A1B4HSK6_9BURK	Uncharacterized protein	WJ16_06325	Burkholderia metallica	1420	MYEAARVTDPIDHTSALAGFLVGAVLGIALIAAVAFATFTCGFGVALLAGMMAGIGAQALLSIGESIGKMFSSQSGNIVTGSPDVYVNSLSAAYATLSGVACSKHNPIPLVAQGSTNIFINGRPAARKDDKITCGATIADGSHDTFFHGGTQTYLPVDDEVPPWLRTATDWAFALAGLVGGLGGLLKAAGGLSRAVLPCTAKFIGGFVLGEAFGRYVAGPAINKAIGGMFGNPVDVTTGRKILQAESETDFVIPSPMPVSVERFYSSSIDYAGTLGRGWVLPWERRLHARDGRLWFTDAQGRESGFPLLRSGQAAFSEAEQQYLTCTPDGRYILHDIGETYYDFGRYEPDSGRIAWVRRIEDQAGQWCQFERDSRGRVSEILTCGGLNAVLDYEQEHGR…
I2DZ48_9BURK	Rhs family protein	MYA_5583	Burkholderia sp. KJ006	1420	MYEAARVTDPIDHTSALAGFLVGAVLGIALIAAVAFATFTCGFGVALLAGMMAGIGAQALLSIGESIGKMFSSQSGNIITGSPDVYVNSLSAAYATLSGVACSKHNPIPLVAQGSTNIFINGRPAARKDDKITCGATIGDGSHDTFFHGGTQTYLPVDDEVPPWLRTATDWAFALAGLVGGLGGLLKAAGGLSRAVLPCAAKFIGGFVLGEAFGRYVAGPAINKAIGGMFGNPVDVTTGRKILQAESETDFVIPSPMPVSVERFYSSSIDYAGTLGRGWVLPWERRLHARDGRLWLTDTQGRESGFPLLRAGQAAFSEAEQQYLTCTPDGRYVLHDIGETYYDFGRYDPDSGRIAWVRRIEDQAGQWCQFERDSRARVTEILTCGGLNAVLDYEQERGR…
A0A087NJQ5_BURPY	Uncharacterized protein	JM78_34760	Burkholderia pyrrocinia (Pseudomonas pyrrocinia)	1420	MYEAARVTDPIDHTSALAGFLVGAVLGIALIAAVAFATFTCGFGVALLAGMMAGIGAQALLSIGESIGKMFSSQSGNIITGSPDVYVNSLSAAYATLSGVACSKHNPIPLVAQGSTNIFINGRPAARKDDKITCGATIGDGSRDTFFHGGTQTYLPVDDEVPPWLRTATDWAFALAGLVGGLGGLLKAAGGLSRAVLPCAAKYIGGFVLGEAFGRYVAGPAINKAIGGMFGNPVDVTTGRKILQAESETDFVIPSPMPVSVERFYSSSIDYAGTLGRGWVLPWERRLHARDGRLWLTDTQGRESGFPLLRAGQAAFSEAEQQYLTCTPDGRYILHDIGETYYDFGRYDPDSGRIAWVRRIEDQAGQWCQFERDSRGRVTEILTCGGLNAVLDYEQEHGR…
A0A103BM20_9BURK	Uncharacterized protein	WS61_03075	Burkholderia sp. ABCPW 11	1420	MYEAARVTDPIDHTSALAGFLVGAVLGIALIAAVAFATFTCGFGVALLAGMMAGIGAQALLSIGESIGKMFSSQSGNIITGSPDVYVNSLSAAYATLSGVACSKHNPIPLVAQGSTNIFINGRPAARKDDKITCGATIGDGSHDTFFHGGTQTYLPVDDEVPPWLRTATDWAFALAGLVGGLGGLLKAAGGLSRAVLPCAAKFIGGFVLGEAFGRYVAGPAINKAIGGMFGNPVDVTTGRKILQAESETDFVIPSPMPVSVERFYSSSIDYAGTLGRGWVLPWERRLHARDGRLWLTDTQGRESGFPLLRAGQAAFSEAEQQYLTCTPDGRYILHDIGETYYDFGRYDPDSGRIAWVRRIEDQAGQWCQFERDSRGRVTEILTCGGLNAVLDYEQEHGR…
A0A3N8QS20_9BURK	Uncharacterized protein	DF037_21090	Burkholderia contaminans	1421	MYEAARVTDPIDHTSALAGFLVGAVLGIALIAAVAFATFTCGFGVALLAGMMAGIGAQALLSIGESIGKMFSSQSGNIITGSPDVYVNSLSAAYATLSGVACSKHNPIPLVAQGSTNIFINGRPAARKEDKITCGATIGDGSHDTFFHGGTQTYLPVEDEVPPWLRTATEWAFVLAGLVGGLGGLLKQAGGLSRAVLPCAAKFIGGYVLGEAFGRYVAGPAINKALGGMFGNPVDVTTGRKILLAESETDFVIPSPMPVAIKRFYSSSIDYAGTLGRGWVAPWELRLHARDGRLWYTDAQGRESGFPLLRAGQAAFSEAEQRYLTCTPDGRYILHDIGETYYDFGRYEPDSGRIAWVRRIEDQAGQWCQFERDSRGRVAEILTCGGMQAVLDYEEVHGR…
A0A103KEN7_9BURK	Uncharacterized protein	WJ13_10890	Burkholderia seminalis	1421	MYEAARVTDPIDHTSALAGFLVGAVLGIALIAAVAFATFTCGFGVALLAGMMAGIGAQALLSIGESIGKMFSSQSGNIITGSSDVYVNSMSAAYATLSGVACSKHNPIPLVAQGSTNIFINGRPAARKDDKITCGATIADGSHDTFFHGGTQTYLPVDDEVPPWLRTATEWAFVLAGLVGGLGGLLKQAGGLSRAVLPCAAKFIGGYVLGEAFGRYVAGPAINKAIGGLFGNPVDVTTGRKILLAESESDFVIPSPMPVAIKRFYSSSIDYAGTLGRGWVAPWELRLHARDGRLWYTDAQGRESGFPLLRAGQAAFSEAEQRYLICTPDGRYILHDLGETYYDFGQYDPDSGRIAWVRRIEDQAGQWCQFERDSRGRVTEILTCGGLRAVLDYEPQHER…
A0A124T2T7_9BURK	Uncharacterized protein	WS96_00665	Burkholderia sp. MSMB1835	1421	MYEAARVTDPIDHTSALAGFLVGAVLGIALIAAVAFATFTCGFGVALLAGMMAGIGAQALLSIGESIGKMFSSQSGNIITGSPDVYVNSLSAAYATLSGVACSKHNPIPLVAQGSTNIFINGRPAARKDDKITCGATIGDGSHDTFFHGGTQTYLPVDDEVPPWLRTATEWAFVLAGLVGGLGGLLKQAGGLSRAVLPCAAKFIGGYVLGEAFGRYVAGPAINKALGGMFGNPVDVTTGRKILLAESETDFVIPSPMPVAIKRFYSSSIDYAGTLGRGWVAPWELRLHARDGRLWYTDAQGRESGFPLLRAGQAAFSEAEQRYLTCTPDGRYILHDIGETYYDFGRYEPDSGRIAWVRRIEDQAGQWCQFERDSRGRVIEILTCGGLNAVLDYEQEHGR…
A0A1V2VU04_9BURK	Uncharacterized protein	A8E72_33435	Burkholderia cenocepacia	1427	MYEAARVTDPIDHTSALAGFLVGAVLGIALIAAVAFATFTCGFGVALLAGMMAGIGAQALLSIGESIGKMFSSQSGNIITGSPDVYVNSLSAAYATLSGVACSKHNPIPLVAQGSTNIFINGRPAARKDDKITCGATIGDGSHDTFFHGGTQTYLPVDDEVPPWLRTATDWAFTLAGLVGGLGGLLKASGGLSRAVLPCAAKFIGGYVLGEAFGRYVAGPAINKAIGGLFGNPIDVTTGRKILLAESETDYVIPSPLPVAIKRFYSSGIDYAGTLGRGWVLPWEIRLHARDGRLWYTDAQGRESGFPMLRAGQAAFSEADQRYLTRTPDGRYILHDLGERYYDFGQYDPESGRIAWVRRVEDQAGQWYQFERDSRGRVTEILTCGGLRAVLDYETVFGR…
A0A1V6L4E7_9BURK	YD repeat (Two copies)	UE95_03830	Burkholderia cenocepacia	1427	MYEAARVTDPIDHTSALAGFLVGAVLGIALIAAVAFATFTCGFGVALLAGMMAGIGAQALLSIGESIGKMFSSQSGNIITGSPDVYVNSLSAAYATLSGVACSKHNPIPLVAQGSTNIFINGRPAARKDDKITCGATIGDGSHDTFFHGGTQTYLPVDDEVPPWLRTATDWAFTLAGLVGGLGGLLKASGGLSRAVLPCAAKFIGGYVLGEAFGRYVAGPAINKAIGGLFGNPIDVTTGRKILLAESETDYVIPSPLPVAIKRFYSSGIDYAGTLGRGWVLPWEIRLHARDGRLWYTDAQGRESGFPMLRAGQAAFSEADQRYLTRTPDGRYILHDLGERYYDFGQYDPESGRIAWVRRVEDQAGQWYQFERDSRGRVTEILTCGGLRAVLDYETVFGR…
I6DU35_SHIBO	RHS Repeat family protein	SB96558_0559	Shigella boydii 965-58	1564	MSEGPGGPQGATAGGTLAMRMLSQQAMVASQMKRAANDKAIAQMLASKKSGPPAARLGDEIQHKSFLGALAGAVLGAIVTIAEGCLIMAACATGPYALVLVPALMYASYKASDYVEEKQNQLESWINSFCDTDGAINTGSENVKINGELAARAAVTLPPPPPPGAIPEVPQGEPSWGDIATDLLESAAEKAVPLAKAWGNAVITLTDSNAGFMDRVSAGASLLFPAGPVLMEFATMVGGRGEIKKDVDFPEAGEDTALCDKENKPPRIAQGSSNVFINNQPAARKGDKLECSAAIVGGSPDVFIGGEQVTYLDIQPEFPPWQRMILGGITIASYLLPPAGLLGKLKNLARLGKLGNLLGKSGKLLGAKLGALLGKTGKSLKSIANKVIRWVTDPVDPVT…
A0A1Q6B452_ECOLX	Type IV secretion protein Rhs (Fragment)	AWP75_25250	Escherichia coli	1161	MSEGPGGPQGATAGGTLAMRMLSQQAMVASQMKRAANDKAIAQMLASKKSGPPAARLGDEIQHKSFLGALAGAVLGAIVTIAEGCLIMAACATGPYALVLVPALMYASYKASDYVEEKQNQLESWINSFCDTDGAINTGSENVKINGELAARAAVTLPPPPPPGAIPEVPQGDPSWGDIATDLLESAAEKAVPLAKAWGNAVITLTDSNAGIMDRVSAGASLLFPAGPVLMEFATMVGGRGEIKKDVDFPEAGKDTALCDKENKPPRIAQGSSNVFINNQPAARKGDKLECSAAIVEGSPDVFIGGEQVTYLDIQPEFPPWQRMILGGITIASYLLPPAGLLGKLGNLAKLGKLGNLLGKSGKLLGAKLGALLSRTKNALKNTYNVLKKFIKDPVDPVT…
D7Y9J7_ECOLX	General secretory system II, protein E, N-terminal domain protein	HMPREF9540_04294	Escherichia coli MS 115-1	1268	MSEGPGGPQGATAGGTLAMRMLSQQAMVASQMKRAANDKAIAQMLAAKKSGPPAARLGDEIQHKSFLGALAGAVLGAIVTIAEGCLIMAACATGPYALVLLPALMYASYKASDYVEEKQNQLESWINSFCDTDGAINTGSENVNINGKPAARAAVTLPPPPPPGAIPEVPQGEPSWGDIATDLLESAAEKAVPLAKAWGNAVITLTDSNAGFMDRVSAGASLLFPAGPVLMEFATMVGGRGEIKKDVDFPEAGEDTALCDKENKPPRIAQGSSNVFINNQPAARKGDKLECSAAIVEGSPDVFIGGEQVTYLDIQLEFPPWQRMILGGITIASYLLPPAGLLGKLGNLARLGKLGNLLGKSGKLLGAKLGALLGKTGKSLKSIANKVIRWVTDPVDPVT…
A0A241QV14_ECOLX	Phage adsorption protein NrfB	nrfB C2U48_07335 D9I97_03620	Escherichia coli	1268	MSEGPGGPQGATAGGTLAMRMLSQQAMVASQMKRAANDKAIAQMLAAKKSGPPAARLGDEIQHKSFLGALAGAVLGAIVTIAEGCLIMAACATGPYALVLLPALMYASYKASDYVEEKQNQLESWINSFCDTDGAINTGSENVNINGKPAARAAVTLPPPPPPGAIPEVPQGEPSWGDIATDLLESAAEKAVPLAKAWGNAVITLTDSNAGFMDRVSAGASLLFPAGPVLMEFATMVGGRGEIKKDVDFPEAGEDTALCDKENKPPRIAQGSSNVFINNQPAARKGDKLECSAAIVEGSPDVFIGGEQVTYLDIQLEFPPWQRMILGGITIASYLLPPAGLLGKLGNLARLGKLGNLLGKSGKLLGAKLGALLGKTGKSLKSIANKVIRWVTDPVDPVT…
S1HRJ7_ECOLX	Bacteriophage N4 adsorption protein B	A1WK_01298	Escherichia coli KTE100	1268	MSEGPGGPQGATAGGTLAMRMLSQQAMVASQMKRAANDKAIAQMLAAKKSGPPAARLGDEIQHKSFLGALAGAVLGAIVTIAEGCLIMAACATGPYALVLLPALMYASYKASDYVEEKQNQLESWINSFCDTDGAINTGSENVNINGKPAARAAVTLPPPPPPGAIPEVPQGEPSWGDIATDLLESAAEKAVPLAKAWGNAVITLTDSNAGFMDRVSAGASLLFPAGPVLMEFATMVGGRGEIKKDVDFPEAGEDTALCDKENKPPRIAQGSSNVFINNQPAARKGDKLECSAAIVEGSPDVFIGGEQVTYLDIQLEFPPWQRMILGGITIASYLLPPAGLLGKLGNLARLGKLGNLLGKSGKLLGAKLGALLGKTGKSLKSIANKVIRWVTDPVDPVT…
S1DFG7_ECOLX	Bacteriophage N4 adsorption protein B	A1U1_00410	Escherichia coli KTE64	1268	MSEGPGGPQGATAGGTLAMRMLSQQAMVASQMKRAANDKAIAQMLAAKKSGPPAARLGDEIQHKSFLGALAGAVLGAIVTIAEGCLIMAACATGPYALVLLPALMYASYKASDYVEEKQNQLESWINSFCDTDGAINTGSENVNINGKPAARAAVTLPPPPPPGAIPEVPQGEPSWGDIATDLLESAAEKAVPLAKAWGNAVITLTDSNAGFMDRVSAGASLLFPAGPVLMEFATMVGGRGEIKKDVDFPEAGEDTALCDKENKPPRIAQGSSNVFINNQPAARKGDKLECSAAIVEGSPDVFIGGEQVTYLDIQLEFPPWQRMILGGITIASYLLPPAGLLGKLGNLARLGKLGNLLGKSGKLLGAKLGALLGKTGKSLKSIANKVIRWVTDPVDPVT…
A0A369D9R9_ECOLX	Type IV secretion protein Rhs (Fragment)	DTL90_26790	Escherichia coli	1239	MSEGPGGPQGATAGGTLAMRMLSQQAMVASQMKRAANNKAIAQMLASKKSGPPAARLGDEIQHKSFLGALAGAVLGAIVTIAEGCLIMAACATGPYALVLVPALMYASYKASDYVEEKQNQLESWINSFCDTDGAINTGSENVKINGKPAARAAVTLPSPPPPEAIPEASQGEHSWGDMALDLLESAAEKAAPLAKSWGNAVITLTDSNASFMDRVSAGASLLFPAGPVLMEFATMVGGRGEIKKDVDFPEAGEDTALCDKENKPPRIAQGSSNVFINNQPAARKGDKLECSAAIVEGSPDVFIGGEQVTYLDIQPEFPPWQRMILGGITIASYLLPPAGLLGKLGNLAKLGKLGNLLGKSGKLLGAKLGALLGKTGKSLKSIANKVIRWVTDPVDPVT…
A0A0V9H0X3_ECOLX	Type IV secretion protein Rhs (Fragment)	APT94_02630	Escherichia coli	1207	MSEGPGGPQGATAGGTLAMRMLSQQAMVASQMKRAANDKAIAQMLASKKSGPPAARLGDEIQHKSFLGALAGAVLGAIVTIAEGCLIMAACATGPYALVLVPALMYASYKASDYVEEKQNQLESWINSFCDTDGAINTGSENVNINGKPAARAAVTLPPPPPPGAIPEIPQGEPSWGDIATDLLESAAEKAVPLAKAWGNAVITLTDSNAGFMDRVSAGASLLFPAGPVLMEFATMVGGRGEIKKDVDFPEAGEDTALCDKENKPPRIAQGSSNVFINNQPAARKGDKLECSAAIVEGSPDVFIGGEQVTYLDIQPEFPPWQRMILGGITIASYLLPPAGLLGKLKNLARLGKLGNLLGKSGKLLGAKLGALLGKTGKSLKSIANKVIRWVTDPVDPVT…
A3S0P3_RALSL	Core protein	RRSL_00158	Ralstonia solanacearum UW551	1432	MFEAARVTDPIEHTSALTGFLIGAVLGVALIAAVAFATFTCGFGVALLAGLAAGVGASAILGLGEAIGKSRWFTSTTGTILTGSTNVFVNGKLAAFATASTVACSKHSPVPLIAQGSGGVFINSKPAARKGDKITCGAAVADGSSNVFMGGGTQTYLPYDDEVPPWLRTTVDWAFALAGLVGGLAGLVKAAGGLSRAVLPCAAKFIGGYVIGEAVGRYVAAPVVSRVMGGLFGHPVDVTTGRKVLLADDETDAVVPSPMPLVCRRFYASNLDHTGTLGRGWVLPWELRLHRRDGRLWYTDAQGRESGFPLVAPGQMAFSDTEQRYLTCTPDGRYILHDLSETYYDFGRLDAEGDGIAWVRRIEDQAGQWQDYARDGEGRVREILTSGGVRVALDYEPLH…
A0A1C0UB30_RALSL	Uncharacterized protein	AR466_16590	Ralstonia solanacearum (Pseudomonas solanacearum)	1432	MFEAARVTDPIEHTSALTGFLIGAVLGVALIAAVAFATFTCGFGVALLAGLAAGVGASAILGLGEAIGKSRWFTSTTGTILTGSTNVFVNGKLAAFATASTVACSKHSPVPLIAQGSGGVFINSKPAARKGDKITCGAAVADGSSNVFMGGGTQTYLPYDDEVPPWLRTTVDWAFALAGLVGGLAGLVKAAGGLSRAVLPCAAKFIGGYVIGEAVGRYVAAPVVSRVMGGLFGHPVDVTTGRKVLLADDETDAVVPSPMPLVCRRFYASNLDHTGTLGRGWVLPWELRLHRRDGRLWYTDAQGRESGFPLVAPGQMAFSDTEQRYLTCTPDGRYILHDLSETYYDFGRLDAEGDGIAWVRRIEDQAGQWQDYARDGEGRVREILTSGGVRVALDYEPLH…
F6G7S1_RALS8	Rhs-related protein	RSPO_m00561	Ralstonia solanacearum (strain Po82)	1432	MFEAARVTDPIEHTSALTGFLIGAVLGVALIAAVAFATFTCGFGVALLAGLAAGVGASAILGLGEAIGKSRWFTSTTGTILTGSTNVFVNGKLAAFAMASTVACSKHSPVPLIAQGSGGVFINSKPAARKGDKITCGAAVADGSANVFMGGGTQTYLPYDDEVPPWLRTTVDWAFALAGLVGGLAGLVKAAGGLSRAVLPCAAKFIGGYVIGEAVGRYVAAPVVSRVMGGLFGHPVDVTTGRKVLLADDETDAVVPSPMPLVCRRFYASNLDPAGTLGRGWVLPWELRLHRRDGRLWYTDAQGRESGFPLVAPGQMAFSDTEQRYLTCTPDGRYILHDLSETYYDFGRLDAEGDGVAWVRRIEDQAGQWQDYARDGEGRVREILTSGGVRVALDYEPLH…
D8P630_RALSL	Uncharacterized protein	RCFBP_mp30281	Ralstonia solanacearum CFBP2957	1432	MFEAARVTDPIEHTSALTGFLIGAVLGVALIAAVAFATFTCGFGVALLAGLAAGVGASAILGLGEAIGKSRWFTSTTGTILTGSTNVFVNGKLAAFATASTVACSKHSPVPLIAQGSGGVFINSKPAARKGDKITCGAAVADGSSNVFMGGGTQTYLPYDDEVPPWLRTTVDWAFALAGLVGGLAGLVKAAGGLSRAVLPCAAKFIGGYVIGEAVGRYVAAPVVSRVMGGLFGHPVDVTTGRKVLLADDETDAVVPSPMPLVCRRFYASNLDRAGTLGRGWVLPWDLRLHRRDGRLWYTDAQGRESGFPLVAPGQMAFSDTEQRYLTCTPDGRYILHDLSETYYDFGRLDADGDGVAWVRRIEDQAGQWQDYARDGEGRVREILTSGGVRVALDYEPLH…
A0A3T3ZKB5_ECOLX	Type IV secretion protein Rhs (Fragment)	DLW88_07590	Escherichia coli	1216	MSEGPGGPQGATAGGTLAMRMLSQQAMVASQMKRAANDKAIAQMLAAKKSGPPAARLGDEIQHKSFLGALAGAVLGAIVTIAEGCLIMAACATGPYALVLVPALMYASYKASDYVEEKQNQLESWINSFCDTDGAINTGSENVKINGKPAARAAVTLPPPPLTEAIPSPPQGEPSWGDIATDLLESAAEKAVPLAKAWGNAVITLTDSNAGIMDRVSAGASLLFPAGPVLMEFATMVGGRGEIKKDVDFPEAGEDTALCDKENKPPRIAQGSSNVFINNQPAARKGDKLECSAAIVEGSPDVFIGGEQVTYLDIQPEFPPWQRMILGGITIASYLLPPAGLLGKLGNLAKLGKLGNLLGKSGKLLGAKLGALLGKTGKSLKSIANKVIRWVTDPVDPVT…
A0A3P6LX75_SHIDY	Rhs core protein with extension	wapA_5 NCTC2966_04234	Shigella dysenteriae	1579	MSEGPGGPQGATAGGTLAMRMLSQQAMVASQMKRAANDKAIAQMLASKKSGPPAARLGDEIQHKSFLGALAGAVLGAIVTIAEGCLIMAACATGPYALVLVPALMYASYKASDYVEEKQNQLESWINSFCDTDGAINTGSENVKINGELAARAAVTLPPPPPPGAIPEVPQGEPSWGDIATDLLESAAEKAVPLAKAWGNAVITLTDSNAGFMDRVSAGASLLFPAGPVLMEFATMVGGRGEIKKDVDFPEAGEDTALCDKENKPPRIAQGSSNVFINNQPAARKGDKLECSAAIVGGSPDVFIGGEQVTYLDIQPEFPPWQRMILGGITIASYLLPPAGLLGKLKNLARLGKLGNLLGKSGKLLGAKLGALLGKTGKSLKSIANKVIRWVTDPVDPVT…
B3WZT8_9ENTR	YD repeat protein	Sd1012_3970	Shigella dysenteriae 1012	1579	MSEGPGGPQGATAGGTLAMRMLSQQAMVASQMKRAANDKAIAQMLASKKSGPPAARLGDEIQHKSFLGALAGAVLGAIVTIAEGCLIMAACATGPYALVLVPALMYASYKASDYVEEKQNQLESWINSFCDTDGAINTGSENVKINGELAARAAVTLPPPPPPGAIPEVPQGEPSWGDIATDLLESAAEKAVPLAKAWGNAVITLTDSNAGFMDRVSAGASLLFPAGPVLMEFATMVGGRGEIKKDVDFPEAGEDTALCDKENKPPRIAQGSSNVFINNQPAARKGDKLECSAAIVGGSPDVFIGGEQVTYLDIQPEFPPWQRMILGGITIASYLLPPAGLLGKLKNLARLGKLGNLLGKSGKLLGAKLGALLGKTGKSLKSIANKVIRWVTDPVDPVT…
A0A376FRD4_ECOLX	Rhs core protein with extension	wapA_2 NCTC11181_00940	Escherichia coli	1607	MSEGPGGPQGATAGGTLAMRMLSQQAMVASQMKRAANDKAIAQMLASKKSGPPAARLGDEIQHKSFLGALAGAVLGAIVTIAEGCLIMAACATGPYALVLVPALMYASYKASDYVEEKQNQLESWINSFCDTDGAINTGSENVNINGKPAARAAVTLPPPPPPGAIPEVPQGEPSWGDIATDLLESAAEKAVPLAKAWGNAVITLTDSNAGFMDRVSAGASLLFPAGPVLMEFATMVGGRGEIKKEVDFPEAGEDTALCDKENKPPRIAQGSSNVFINNQPAARKGDKLECSAAIVGGSPDVFIGGEQVTYLDIQPEFPPWQRMILGGITIASYLLPPAGLLGKLKNLARLGKLGNLLGKSGKLLGAKLGALLGKTGKSLKSIANKVIRWVTDPVDPVT…
A0A4T8PFJ4_ECOLX	Type IV secretion protein Rhs	C9Z89_24690	Escherichia coli	1578	MSEGPGGPQGATAGGTLAMRMLSQQAMVASQMKRAANDKAIAQMLAAKKSGPPAARLGDEIQHKSFLGALAGAVLGAIVTIAEGCLIMAACATGPYALVLVPALMYASYKASDYVEEKQNQLESWINSFCDTDGAINTGSENVNINGKPAARAAVTLPPPPPPGAIPEIPQGEPSWGDIATDLLESAAEKAVPLAKAWGNAVITLTESNAGFMDRVSAGASLLFPAGPVLMEFATMVGGRSEIKKDVDFPEAGEDTALCDKENKPPRIAQGSSNVFINNQPAARKGDKLECSAAIVGGSPDVFIGGEQVTYLDIQPEFPPWQRMILGGITIASYLLPPAGLLGKLKNLARLGKLGNLLGKSGKLLGAKLGALLGKTGKSLKSIANKVIRWVTDPVDPVT…
A0A1D7PQF1_ECOLX	Type IV secretion protein Rhs	AW106_12720 ED600_25455 EKI52_08035 F7F23_26240	Escherichia coli	1578	MSEGPGGPQGATAGGTLAMRMLSQQAMVASQMKRAANDKAIAQMLAAKKSGPPAARLGDEIQHKSFLGALAGAVLGAIVTIAEGCLIMAACATGPYALVLVPALMYASYKASDYVEEKQNQLESWINSFCDTDGAINTGSENVNINGKPAARAAVTLPPPPPPGAIPEIPQGEPSWGDIATDLLESAAEKAVPLAKAWGNAVITLTESNAGFMDRVSAGASLLFPAGPVLMEFATMVGGRSEIKKDVDFPEAGEDTALCDKENKPPRIAQGSSNVFINNQPAARKGDKLECSAAIVGGSPDVFIGGEQVTYLDIQPEFPPWQRMILGGITIASYLLPPAGLLGKLKNLARLGKLGNLLGKSGKLLGAKLGALLGKTGKSLKSIANKVIRWVTDPVDPVT…
A0A402YT48_ECOLX	Type IV secretion protein Rhs	CQ146_24080 CW396_26520	Escherichia coli O26	1578	MSEGPGGPQGATAGGTLAMRMLSQQAMVASQMKRAANDKAIAQMLAAKKSGPPAARLGDEIQHKSFLGALAGAVLGAIVTIAEGCLIMAACATGPYALVLVPALMYASYKASDYVEEKQNQLESWINSFCDTDGAINTGSENVNINGKPAARAAVTLPPPPPPGAIPEIPQGEPSWGDIATDLLESAAEKAVPLAKAWGNAVITLTESNAGFMDRVSAGASLLFPAGPVLMEFATMVGGRSEIKKDVDFPEAGEDTALCDKENKPPRIAQGSSNVFINNQPAARKGDKLECSAAIVGGSPDVFIGGEQVTYLDIQPEFPPWQRMILGGITIASYLLPPAGLLGKLKNLARLGKLGNLLGKSGKLLGAKLGALLGKTGKSLKSIANKVIRWVTDPVDPVT…
A0A027ZCI4_ECOLX	Type IV secretion protein Rhs	BX06_04365	Escherichia coli O69:H11 str. 08-4661	1578	MSEGPGGPQGATAGGTLAMRMLSQQAMVASQMKRAANDKAIAQMLAAKKSGPPAARLGDEIQHKSFLGALAGAVLGAIVTIAEGCLIMAACATGPYALVLVPALMYASYKASDYVEEKQNQLESWINSFCDTDGAINTGSENVNINGKPAARAAVTLPPPPPPGAIPEIPQGEPSWGDIATDLLESAAEKAVPLAKAWGNAVITLTESNAGFMDRVSAGASLLFPAGPVLMEFATMVGGRSEIKKDVDFPEAGEDTALCDKENKPPRIAQGSSNVFINNQPAARKGDKLECSAAIVGGSPDVFIGGEQVTYLDIQPEFPPWQRMILGGITIASYLLPPAGLLGKLKNLARLGKLGNLLGKSGKLLGAKLGALLGKTGKSLKSIANKVIRWVTDPVDPVT…
B7L8E9_ECO55	Rhs core protein with extension	EC55989_0558	Escherichia coli (strain 55989 / EAEC)	1620	MSEGPGGPQGATAGGTLAMRMLSQQAMVASQMKRAANDKAIAQMLASKKSGPPAARLGDEIQHKSFLGALAGAVLGAIVTIAEGCLIMAACATGPYALVLVPALMYASYKASDYVEEKQNQLESWINSFCDTDGAINTGSENVKINGELAARAAVTLPPPPPPGAIPEVPQGEPSWGDIATDLLESAAEKAVPLAKAWGNAVITLTDSNAGFMDRVSAGASLLFPAGPVLMEFATMVGGRGEIKKEVDFPEAGEDTALCDKENKPPRIAQGSSNVFINNQPAARKGDKLECSAAIVGGSPDVFIGGEQVTYLDIQPEFPPWQRMILGGITIASYLLPPAGLLGKLKNLARLGKLGNLLGKSGKLLGAKLGALLGKTGKSLKSIANKVIRWVTDPVDPVT…
A0A222QGU5_ECOLX	Rhs core protein with extension	A610_536	Escherichia coli NCCP15648	1620	MSEGPGGPQGATAGGTLAMRMLSQQAMVASQMKRAANDKAIAQMLASKKSGPPAARLGDEIQHKSFLGALAGAVLGAIVTIAEGCLIMAACATGPYALVLVPALMYASYKASDYVEEKQNQLESWINSFCDTDGAINTGSENVKINGELAARAAVTLPPPPPPGAIPEVPQGEPSWGDIATDLLESAAEKAVPLAKAWGNAVITLTDSNAGFMDRVSAGASLLFPAGPVLMEFATMVGGRGEIKKEVDFPEAGEDTALCDKENKPPRIAQGSSNVFINNQPAARKGDKLECSAAIVGGSPDVFIGGEQVTYLDIQPEFPPWQRMILGGITIASYLLPPAGLLGKLKNLARLGKLGNLLGKSGKLLGAKLGALLGKTGKSLKSIANKVIRWVTDPVDPVT…
A0A1C9CJG6_ECOLX	Rhs core protein (Type IV secretion protein Rhs)	ct1C CRM83_12975	Escherichia coli	1620	MSEGPGGPQGATAGGTLAMRMLSQQAMVASQMKRAANDKAIAQMLASKKSGPPAARLGDEIQHKSFLGALAGAVLGAIVTIAEGCLIMAACATGPYALVLVPALMYASYKASDYVEEKQNQLESWINSFCDTDGAINTGSENVKINGELAARAAVTLPPPPPPGAIPEVPQGEPSWGDIATDLLESAAEKAVPLAKAWGNAVITLTDSNAGFMDRVSAGASLLFPAGPVLMEFATMVGGRGEIKKEVDFPEAGEDTALCDKENKPPRIAQGSSNVFINNQPAARKGDKLECSAAIVGGSPDVFIGGEQVTYLDIQPEFPPWQRMILGGITIASYLLPPAGLLGKLKNLARLGKLGNLLGKSGKLLGAKLGALLGKTGKSLKSIANKVIRWVTDPVDPVT…
A0A447NZX4_SALET	Rhs-family protein (SPI-6 associated)	NCTC7406_04072	Salmonella enterica subsp. enterica serovar Sanjuan	369	MYEAARVDDPIYHTSALAGFLIGAIIGIAIIAIAAFALFSCGILAGLILGFMADQIASGVLQLGEAIGRSIHHTAGKILTGSENVSTNSRPAARAVLSTVKCDNHIAEKRIAQGSENIYINSQPAARKDDHTECDAVIEDGSPNVFLGGGTQTVLEISSEIPDWLRKVVDVLFVVASLLGGLAGAWRQAAKLGTKFGTKCAAKFIGGELTGMAVSEAISGLFSNPVDVTTGQKILLPETDFTLPGRLPVTCSRFYASHLETVGLLGRGWRLNWENSLREDDEHITLTGVQGRELRYPKTMLTPGHQIFDRKNSYTSAACMTGVTCCITPIAAIMYLVILTVTAWHTCCLWRRRTASALSSGTKEADWYG
A0A398UD02_SHIBO	Type IV secretion protein Rhs	CUA56_00080	Shigella boydii	1615	MSEGPGGPQGATAGGTLAMRMLSQQAMVASQMKRAANDKAIAQMLASKKSGPPAARLGDEIQHKSFLGALAGAVLGAIVTIAEGCLIMAACATGPYALVLVPALMYASYKASDYVEEKQNQLESWINSFCDTDGAINTGSENVKINGELAARAAVTLPPPPPPGAIPEVPQGEPSWGDIATDLLESAAEKAVPLAKAWGNAVITLTDSNAGFMDRVSAGASLLFPAGPVLMEFATMVGGRGEIKKDVDFPEAGEDTALCDKENKPPRIAQGSSNVFINNQPAARKGDKLECSAAIVGGSPDVFIGGEQVTYLDIQPEFPPWQRMILGGITIASYLLPPAGLLGKLKNLARLGKLGNLLGKSGKLLGAKLGALLGKTGKSLKSIANKVIRWVTDPVDPVT…
A0A0K6A3W7_ECOLX	Rhs core protein	wapA_3 ERS150876_05283	Escherichia coli	1599	MSEGPGGPQGATAGGTLAMRMLSQQAMVASQMKRAANDKAIAQMLAAKKSGPPAARLGDEIQHKSFLGALAGAVLGAIVTIAEGCLIMAACATGPYALVLVPALMYASYKASDYVEEKQNQLESWINSFCDTDGAINTGSENVNINGKPAARAAVTLPPPPPPGAIPEIPQGEPSWGDIATDLLESAAEKAVPLAKAWGNAVITLTESNAGFMDRVSAGASLLFPAGPVLMEFATMVGGRSEIKKDVDFPEAGEDTALCDKENKPPRIAQGSSNVFINNQPAARKGDKLECSAAIVGGSPDVFIGGEQVTYLDIQPEFPPWQRMILGGITIASYLLPPAGLLGKLKNLARLGKLGNLLGKSGKLLGAKLGALLGKTGKSLKSIANKVIRWVTDPVDPVT…
A0A028DLZ7_ECOLX	Type IV secretion protein Rhs	BX23_04275	Escherichia coli O118:H16 str. 2009C-4446	1599	MSEGPGGPQGATAGGTLAMRMLSQQAMVASQMKRAANDKAIAQMLAAKKSGPPAARLGDEIQHKSFLGALAGAVLGAIVTIAEGCLIMAACATGPYALVLVPALMYASYKASDYVEEKQNQLESWINSFCDTDGAINTGSENVNINGKPAARAAVTLPPPPPPGAIPEIPQGEPSWGDIATDLLESAAEKAVPLAKAWGNAVITLTESNAGFMDRVSAGASLLFPAGPVLMEFATMVGGRSEIKKDVDFPEAGEDTALCDKENKPPRIAQGSSNVFINNQPAARKGDKLECSAAIVGGSPDVFIGGEQVTYLDIQPEFPPWQRMILGGITIASYLLPPAGLLGKLKNLARLGKLGNLLGKSGKLLGAKLGALLGKTGKSLKSIANKVIRWVTDPVDPVT…
K4WFU7_ECOLX	Rhs core protein with extension	ECO9455_29259	Escherichia coli O111:H11 str. CVM9455	1599	MSEGPGGPQGATAGGTLAMRMLSQQAMVASQMKRAANDKAIAQMLAAKKSGPPAARLGDEIQHKSFLGALAGAVLGAIVTIAEGCLIMAACATGPYALVLVPALMYASYKASDYVEEKQNQLESWINSFCDTDGAINTGSENVNINGKPAARAAVTLPPPPPPGAIPEIPQGEPSWGDIATDLLESAAEKAVPLAKAWGNAVITLTESNAGFMDRVSAGASLLFPAGPVLMEFATMVGGRSEIKKDVDFPEAGEDTALCDKENKPPRIAQGSSNVFINNQPAARKGDKLECSAAIVGGSPDVFIGGEQVTYLDIQPEFPPWQRMILGGITIASYLLPPAGLLGKLKNLARLGKLGNLLGKSGKLLGAKLGALLGKTGKSLKSIANKVIRWVTDPVDPVT…
A0A0V7X398_ECOLX	Type IV secretion protein Rhs	A6V01_28550 AML07_09015 APZ14_05180 DAH32_03105 DIV22_30410	Escherichia coli	1599	MSEGPGGPQGATAGGTLAMRMLSQQAMVASQMKRAANDKAIAQMLAAKKSGPPAARLGDEIQHKSFLGALAGAVLGAIVTIAEGCLIMAACATGPYALVLVPALMYASYKASDYVEEKQNQLESWINSFCDTDGAINTGSENVNINGKPAARAAVTLPPPPPPGAIPEIPQGEPSWGDIATDLLESAAEKAVPLAKAWGNAVITLTESNAGFMDRVSAGASLLFPAGPVLMEFATMVGGRSEIKKDVDFPEAGEDTALCDKENKPPRIAQGSSNVFINNQPAARKGDKLECSAAIVGGSPDVFIGGEQVTYLDIQPEFPPWQRMILGGITIASYLLPPAGLLGKLKNLARLGKLGNLLGKSGKLLGAKLGALLGKTGKSLKSIANKVIRWVTDPVDPVT…
E9XP92_ECOLX	Uncharacterized protein (Fragment)	ERFG_02889	Escherichia coli TW10509	1221	MSEGPGGPQGATAGGTLAMRMLSQQAMVASQMKRAANDKAIAQMLASKKSGPPAARLGDEIQHKSFLGALAGAVLGAIVTIAEGCLIMAACATGPYALVLVPALMYASYKASDYVEEKQNQLESWINSFCDTDGAINTGSENVKINGELAARAAVTLPPPPPPGAIPEVPQGDPSWGDIATDLLESAAEKAVPLAKAWGNAVITLTDSNAGIMDRVSAGASLLFPAGPVLMEFATMVGGRGEIKKDVDFPEAGKDTALCDKENKPPRIAQGSSNVFINNQPAARKGDKLECSAAIVEGSPDVFIGGEQVTYLDIQPEFPPWQRMILGGITIASYLLPPAGLLGKLGNLAKLGKLGNLLGKSGKLLGAKLGALLSRTKNALKNTYNVLKKFIKDPVDPVT…
D6HTD7_ECOLX	Rhs core protein with extension (Fragment)	ECCG_03560	Escherichia coli B088	1221	MSEGPGGPQGATAGGTLAMRMLSQQAMVASQMKRAANDKAIAQMLAAKKSGPPAARLGDEIQHKSFLGALAGAVLGAIVTIAEGCLIMAACATGPYALVLVPALMYASYKASDYVEEKQNQLESWINSFCDTDGAINTGSENVNINGKPAARAAVTLPPPPPPGAIPEVPQGEPSWGDIATDLLESAAEKAVPLAKAWGNAVITLTDSNAGFMDRLCAGTSLLFPAGPVLMEFATMVGGRGEIKKDVDFPEAGEDTALCDKENKPPRIAQGSSNVFINNQPAARKGDKLECSAAIVEGSPDVFIGGEQVTYLDIQPEFPPWQRMILGGITIASYLLPPAGLLGKLGNLAKLGKLGNLLGKSGKLLGAKLGALLSRTKNALKNTYNVLKKFIKDPVDPVT…
A0A3Y0QXP7_ECOLX	Uncharacterized protein (Fragment)	D4U50_28385	Escherichia coli	128	MSEGPGGPQGATAGGTLAMRMLSQQAMVASQMKRAANDKAIAQMLAAKKSGPPAARLGDEIQHKSFLGALAGAVLGAIVTIAEGCLIMAACATGPYALVLVPALMYASYKASDYVEEKQNQLESWINS
A0A3W6ECL2_ECOLX	Type IV secretion protein Rhs (Fragment)	EAX75_13090	Escherichia coli	1305	MSEGPGGPQGATAGGTLAMRMLSQRAMAASQMKRAANDKAIAQMLASKKSGPPAARLGDEIQHKSFLGALAGAVLGAIVTIAEGCLIMAACATGPYALVLVPALMYASYKASDYVEEKQNQLESWINSFCDTDGAINTGSKNVKINGKPAARAAVTLPPPPPPGAIPEVPQGEPSWGDIATDLLESAAEKAVPLAKAWGNAVITLTDSNAGFMDRVSAGASLLFPAGPVLMEFATMVGGRGEIKKDVDFPEAGEDTALCDKENKPPRIAQGSSNVFINNQPAARKGDKLECSAAIVEGSPDVFIGGEQVTYLDIQPEFPPWQRMILGGITIASYLLPPAGLLGKLGNLAKLGKLGNLLGKSGKLLGAKLGALLGKTGNSLKSIANKVIRWVTDPVDPVT…
A0A2A9LAB5_9BURK	RHS repeat-associated protein	BX604_4703	Burkholderia sp. JKS000303	1401	MFEAARVTDPIDHTSALAGFLVGAVLGIALIAAVAFATFTCGFGVALLAGMMAGIGAQALLSIGESIGKMFSSQSGNIMTGSPDVYVNSMSAAYATLSGVACSKHNPVPLVAQGSTNIFINGRPAARKDDKVTCGATIADGSHDTFFHGGTQTYLPVDDEVPPWLRTATEWAFVLAGLVGGLGGLLKQAGGLSRAVLPCAAKFIGGYVLGEAFGRYVAGPAINKAIGGMFGNPVDITTGRKILLAESETDFVIPSPMPVAIKRFYSSSIDYAGTLGRGWVAPWELRLHARDGRLWYTDAQGRESGFPLLRAGQAAFSEADQRYLTCTPDGRYILHDIGETYYDFGRYDPDSGRIAWVRRIEDQAGQWCQFERDSRGRVTEILTCGGLNAVLDYEQEHGR…
A0A2A4CD53_9BURK	Uncharacterized protein	CN645_16850	Burkholderia sp. IDO3	1412	MFEAARVTDPIDHTSALAGFLVGAVLGIALIAAVAFATFTCGFGVALLAGMMAGIGAQALLSIGESIGKMFSSQSGNIITGSPDVYVNSLSAAYATLSGVACSKHNPVPLVAQGSTNIFINGRPAARKDDKITCGATIADGSHDTFFHGGTQTYLPVDDEVPPWLRTATEWAFVLAGLVGGLGGLLKQAGGLSRAVLPCAAKFIGGYVLGEAFGRYVAGPAINKAIGGMFGNPVDITTGRKILLAESETDFVIPSPMPVAIKRFYSSSIDYAGTLGRGWVAPWELRLHARDGRLWYTDAQGRESGFPLLRAGQAAFSEADQRYLTCTPDGRYILHDIGETYYDFGRYDPDSGRIAWVRRIEDQAGQWCQFERDSRGRVTEILTCGGLNAVLDYEQEHGR…
A0A3Z9KHU0_ECOLX	Type IV secretion protein Rhs	EIZ21_09655	Escherichia coli	1512	MSEGPGGPQGATAGGTLAMRMLSQQAMVASQMKRAANDKAIAQMLASKKSGPPAARLGDEIQHKSFLGALAGAVLGAIVTIAEGCLIMAACATGPYALVLVPALMYASYKASDYVEEKQNQLESWINSFCDTDGAINTGSENVKINGELAARAAVTLPPPPPPGAIPEVPQGEPSWGDIATDLLESAAEKAVPLAKAWGNAVITLTDSNAGFMDRVSAGASLLFPAGPVLMEFATMVGGRGEIKKEVDFPEAGEDTALCDKENKPPRIAQGSSNVFINNQPAARKGDKLECSAVIVGGSPDVFIGGEQVTYLDIQPEFPPWQRMILGGITIASYLLPPAGLLGKLKNLARLGKLGNLLGKSGKLLGAKLGALLGKTGKSLKSIANKVIRWVTDPVDPVT…
A0A3Z9L229_ECOLX	Type IV secretion protein Rhs	EIZ14_20220	Escherichia coli	1620	MSEGPGGPQGATAGGTLAMRMLSQQAMVASQMKRAANDKAIAQMLASKKSGPPAARLGDEIQHKSFLGALAGAVLGTIVTIAEGCLIMAACATGPYALVLVPALMYASYKASDYVEEKQNQLESWINSFCDTDGAINTGSENVKINGKPAARAAVTLPPPPPPGAIPEVPQGEPSWGDIATDLLESAAEKAVPLAKAWGNAVITLTDSNAGFMDRVSAGASLLFPAGPVLMEFATMVGGRGEIKKDVDFPEAGEDTALCDKENKPPRIAQGSSNVFINNQPAARQGDKLECSAAIVGGSPDVFIGGEQVTYLDIQPEFPPWQRMILGGITIASYLLPPAGLLGKLKNLARLGKLGNLLGKSGKLLGAKLGALLGKTGKSLKSIANKVIRWVTDPVDPVT…
A0A3W3G7V2_ECOLX	Type IV secretion protein Rhs (Fragment)	D8Y65_10565	Escherichia coli	1323	MSEGPGGPQGATAGGTLAMRMLSQRAMAASQMKRAANDKAIAQMLASKKSGPPAARLGDEIQHKSFLGALAGAVLGAIVTIAEGCLIMAACATGPYALVLVPALMYASYKASDYVEEKQNQLESWINSFCDTDGAINTGSKNVKINGKPAARAAVTLPPPPPPGAIPEVPQGEPSWGDIATDLLESAAEKAVPLAKAWGNAVITLTDSNAGFMDRVSAGASLLFPAGPVLMEFATMVGGRGEIKKDVDFPEAGEDTALCDKENKPPRIAQGSSNVFINNQPAARKGDKLECSAAIVEGSPDVFIGGEQVTYLDIQPEFPPWQRMILGGITIASYLLPPAGLLGKLGNLAKLGKLGNLLGKSGKLLGAKLGALLGKTGNSLKSIANKVIRWVTDPVDPVT…
A0A0B6SDK1_9BURK	Uncharacterized protein	BGL_2c22420	Burkholderia plantarii	1412	MYEAARVTDPIEHTSALTGFLVGAVLGIALIAAVAFATFTCGFGVALLAGMAAGIGAQVLLSLGESIGKMFSSQSGAITLGSPNVYVNGKQAAYATLSSVTCSKHNPTPLVAQGSTNIFINGKPAARKDDKITCGAAISDGSHDTYFHGGTQTCLPIDDEVPPWLRTATDWAFALAGLVGGLGGLLKEAGGLSRAVMPCAAKFIGGYVLGEAASRYVIGPAINSAIGGMFGNPVDVTTGRKILPAESETDYVVPSPMPVAIRRFYSSDLDYVGTLGRGWVLPWELRLHARDGRLWYTDAQGREAGFPILKPGQAAFSEADQRYLTCTPDGRYILHDVGETYYDFGRYEPGSGRIGWVRRIEDQAGQWCQFERDSRGRVREIQTCGGLLAVLDYEPAHER…
F2LTA6_BURGS	YD repeat protein	bgla_4p3010	Burkholderia gladioli (strain BSR3)	1412	MYEAARVTDPIEHTSALTGFLVGAVLGIALIAAVAFATFTCGFGVALLAGMAAGIGAQVLLSLGESIGKMFSSQSGAITLGSPNVYVNGKQAAYATLSSVTCSKHNPTPLVAQGSTNIFINGKPAARKDDKITCGAAISDGSHDTYFHGGTQTCLPIDDEVPPWLRTATDWAFALAGLVGGLGGLLKEAGGLSRAVMPCAAKFIGGYVLGEAASRYVIGPAINSAIGGMFGNPVDVTTGRKILPAESETDYVVPSPMPVAIRRFYSSDLDYVGTLGRGWVLPWELRLHARDGRLWYTDAQGREAGFPILKPGQAAFSEADQRYLTCTPDGRYILHDVGETYYDFGHYEPGSGRIGWVRRIEDQAGQWCQFERDSRGRVREIQTCGGLLAVLDYEPEHER…
A0A095FK99_BURGA	RHS repeat-associated core domain protein	DM48_3397	Burkholderia gladioli (Pseudomonas marginata) (Phytomonas marginata)	1412	MYEAARVTDPIEHTSALTGFLVGAVLGIALIAAVAFATFTCGFGVALLAGMAAGIGAQVLLSLGESIGKMFSSQSGAITLGSPNVYVNGKQAAYAMLSSVACSKHNPVPLVAQGSTNIFINGKPAARKDDKITCGATISDGSHDTYFHGGTQTCLPIDDEVPPWLRTATDWAFALAGLVGGLGGLLKEAGGLSRAVMPCAAKFIGGYVLGEAASRYVIGPAINSAIGGMFGNPVDVTTGRKILPAESETDYVVPSPMPVAIRRFYSSDLDYVGTLGRGWVLPWELRLHGRDGRLWYTDAQGRESGFPILKPGQAAFSEADQRYLTCTPDGRYILHDVGETYYDFGRYEPGSGRIGWVRRIEDQAGQWCQFERDSRGRVREIQTCGGLLAVLDYEPEHER…
A0A2T3UZM5_ECOLX	Type IV secretion protein Rhs	C9E25_17055	Escherichia coli	1608	MSEGPGGPQGATAGGTLAMRMQSQRAMVASQMKRAANDKAIAQMLAAKKSGPPAARLDDEIQHKSFLGALAGAVLGAIVTIAEGCLIMAACATGPYALVLVPALMYASYKASDYVEEKQNQLESWINSFCDTDGAINTGSENVNINGKPAARAAVTLPPPPPPGAIPEIPQGEPSWGDIATDLLESAAEKAVPLAKAWGNAVITLTESNAGFMDRVSAGASLLFPAGPVLMEFATMVGGRGEIKKDVDFPEAGEDTALCDKENKPPRIAQGSSNVFINNQPAARKGDKLECSAAIVEGSPDVFIGGEQVTYLDIQPEFPPWQRMILGGITIASYLLPPAGLLGKLGNLAKLGKLGNLLGKSGKLLGAKLGALLGKTCKSLKSIANKVIRWVTDPVDPVT…
A0A3P0NE71_9BURK	Uncharacterized protein	DIE15_13495	Burkholderia sp. Bp9031	1420	MYEAARVTDPIEHTSALTGFLVGAVLGIALIAAVAFATFTCGFGVALLAGMAAGIGAQGLLSLGEAIGRMFSSPSGNIVTGSSDVYVNGKPAAYATLSGVACTKHNPIPLVAQGSTNIFINGRPAARKDDKITCGAAIGDGSHDTFFHGGTQTYLPVADEVPPWLRTATDWAFALAGLVGGLGGLLKAAGGLSRAVLPCAAKFIGGFVLGEAVGRYVAGPAINRAIGGMFGNPIDVTTGRKVLLAESEIDYVIPSPMPVAIKRFYSSSLEYAGTLGRGWVLPWELRLHARDGRLWYTDAQGRETGFPILRAGQAAFSEAEQQYLTCTPDGRYILHDLGEMYYDFGRYEPDSGRIAGVRRIEDQAGQWCQFERDSRGRVSEILTCGGLRAVLDYEPAYGR…
A0A1B4P290_9BURK	Uncharacterized protein	WK25_26995	Burkholderia latens	1421	MYEAARVTDPIEHTSALTGFLVGAVLGIALIAAVAFATFTCGFGVALLAGMAAGIGAQVLLSLGEAVGRMFSSPSGNIVTGSSDVYVNGKPAAYATLSGVACTKHNPIPLVAQGSTNIFINGRPAARKDDKTTCGATIGDGSHDTFFHGGTQTYLPVADEVPPWLRTATDWAFALAGLVGGLGGLLRQAGGLSRAVLPCAAKFIGGYVLGEAVGRYVAGPAINKAIGGMFGNPVDVTTGRKILLAESETDYVIPSPMPVAIKRFYSSSLDYVGSLGRGWVLPWELRLQARDGRLWYTDAQGRESGFPLLRAGQAAFSEADQLYLVCAPDGRYILRDVGETYFDFGRYDPDSSRIAWVRRIEDQAGQWYQFERDSRGRVTEIQTCGGLQAALDYEPEHGR…
A0A2X1MY93_ECOLX	Rhs core protein	NCTC9073_02783	Escherichia coli	204	MSEGPGGPQGATAGGTLAMRMLSQQAMVASQMKRAANDKAIAQMLAAKKSGPPAARLGDEIQHKSFLGALAGAVLGAIVTIAEGCLIMAACATGPYALVLVPALMYASYKASDYVEEKQNQLESWINSFCDTDGAINTGSENVNINGKPAARAAVTLPLLPHLEQYLKSHRGNPHGVILPLTCLNRQRKKQYHWRRPGGTLLSP
A0A3D8JRA7_9BURK	Uncharacterized protein	DWV00_29960	Paraburkholderia sp. DHOM06	1420	MFEAARVTDPIEHTSALTGFLIGAVIGIALIAAVAFATFTCGFGVGLLAGLAAGLGAQGILGLGEAIGSMCTTTTGQLTTGSSNAYINSKPAAYAIASAVTCSKHSPTPMVAQGSKGVFINSKPAARKKDKITCGASISDGSHNTFIGGGTGTYLPIHDEIPPWLRTAVDWAFALAGLVGGLGGLLKEAGGLSRAVLPCAAKFVGGFVLGEAASRYVVAPVVSRVMGGLFGNPVDITTGRKVLLADNETDYVVPSPLPVVCRRFYASDLDYAGTLGRGWVLPWELRLQVRGGRLWYTDAQGRESGFPLLEPGRTAFSETEQRYLTCTPDGRYILYDLSETYYDFGHLDPLSDRIVWVRRIEDQAGQWQQFERDSQGRVCEIVTSGGVSVLLDYEPINDR…
A0A2J9HK75_BURGL	Uncharacterized protein	CEQ24_003025	Burkholderia glumae (Pseudomonas glumae)	1425	MYEAARVTDPIEHTSALTGFLVGAVLGIALIAAVAFATFTCGFGVALLAGMAAGIGAQVLLSLGESIGKMFSSQSGAITLGSPNVYVNGKPTAYAMLSSVTCSKHNPTPLVAQGSTNIFINGKPAARKDDKITCGATISDGSHDTYFHGGTQTCLPIDDEVPPWLRTATDWAFALAGLVGGLGGLLKEAGGLSRAVMPCAAKFIGGYVLGEAASRYVVGPAINSAIGGMFGNPVDVTTGRKILLAESETDYVVPSPMPVAIRRFYSSDLDYVGTLGRGWVLPWELRLHARDGRLWYTDAQGRESGFPMLQPGHAAFSEADQRYLTCTPDGRYILHDLGETYYDFGHYEPGSGRIGWVRRIEDQAGQWCQFERDSRGRVREIQTCGGLLAVLDYEPEHGR…
C5ALM7_BURGB	Rhs family protein	bglu_2g02600	Burkholderia glumae (strain BGR1)	1425	MYEAARVTDPIEHTSALTGFLVGAVLGIALIAAVAFATFTCGFGVALLAGMAAGIGAQVLLSLGESIGKMFSSQSGAITLGSPNVYVNGKPTAYAMLSSVTCSKHNPTPLVAQGSTNIFINGKPAARKDDKITCGATISDGSHDTYFHGGTQTCLPIDDEVPPWLRTATDWAFALAGLVGGLGGLLKEAGGLSRAVMPCAAKFIGGYVLGEAASRYVVGPAINSAIGGMFGNPVDVTTGRKILLAESETDYVVPSPMPVAIRRFYSSDLDYVGTLGRGWVLPWELRLHARDGRLWYTDAQGRESGFPMLQPGHAAFSEADQRYLTCTPDGRYILHDLGETYYDFGHYEPGSGRIGWVRRIEDQAGQWCQFERDSRGRVREIQTCGGLLAVLDYEPEHGR…
A0A3W4GQR7_ECOLX	Type IV secretion protein Rhs (Fragment)	D5645_24700	Escherichia coli	640	MSEGPGGPQGATAGGTLAMRMLSQQAMVASQMKRAANDKAIAQMLASKKSGPPAARLGDEIQHKSFLGALAGAVLGAIVTIAEGCLIMAACATGPYALVLVPALMYASYKASDYVEEKQNQLESWINSFCDTDGAINTGSENVKINGKPAARAAVTLPPPPPPGAIPEVPQGEPSWGDIATDLLESAAEKAVPLAKAWGNAVITLTDSNAGFMDRVSAGASLLFPAGPVLMEFATMVGGRGEIKKDVDFPEAGEDTALCDKENKPPRIAQGSSNVFINNQPAARQGDKLECSAAIVGGSPDVFIGGEQVTYLDIQPEFPPWQRMILGGITIASYLLPPAGLLGKLKNLARLGKLGNLLGKSGKLLGAKLGALLGKTGKSLKSIANKVIRWVTDPVDPVT…
A0A3P5C564_ECOLX	Putative deoxyribonuclease RhsB (EC 3.1.-.-)	rhsB_1 BANRA_00969	Escherichia coli	1589	MSEGPGGPQGATAGGTLAMRMLSQQAMVASQMKRAANDKAIAQMLASKKSGPPAARLGDEIQHKSFLGALAGAVLGAIVTIAEGCLIMAACATGPYALVLVPALMYASYKASDYVEEKQNQLESWINSFCDTDGAINTGSENVKINGELAARAAVTLPPPPPPGAIPEVPQGEPSWGDIATDLLESAAEKAVPLAKAWGNAVITLTDSNAGFMDRVSAGASLLFPAGPVLMEFATMVGGRGEIKKEVDFPEAGEDTALCDKENKPPRIAQGSSNVFINNQPAARKGDKLECSAVIVGGSPDVFIGGEQVTYLDIQPEFPPWQRMILGGITIASYLLPPAGLLGKLKNLARLGKLGNLLGKSGKLLGAKLGALLGKTGKSLKSIANKVIRWVTDPVDPVT…
A0A3W4V1A2_ECOLX	Type IV secretion protein Rhs (Fragment)	D7K07_06580	Escherichia coli	1598	MSEGPGGPQGATAGGTLAMRMLSQQAMVASQMKRAANDKAIAQMLAAKKSGPPAARLGDEIQHKSFLGALAGAVLGAIVTIAEGCLIMAACATGPYALVLVPALMYASYKASDYVEEKQNQLESWINSFCDTDGAINTGSENVNINGKPAARAAVTLPPPPPPGAIPEIPQGEPSWGDIATDLLESAAEKAVPLAKAWGNAVITLTESNAGFMDRVSAGASLLFPAGPVLMEFATMVGGRSEIKKDVDFPEAGEDTALCDKENKPPRIAQGSSNVFINNQPAARKGDKLECSAAIVGGSPDVFIGGEQVTYLDIQPEFPPWQRMILGGITIASYLLPPAGLLGKLKNLARLGKLGNLLGKSGKQLGAKLGALLGKTGKSLKSIANKVIRWVTDPVVPVT…
K4URT5_ECOLX	Rhs core protein with extension	ECO9634_12996	Escherichia coli O111:H8 str. CVM9634	1599	MSEGPGGPQGATAGGTLAMRMLSQQAMVASQMKRAANDKAIAQMLAAKKSGPPAARLGDEIQHKSFLGALAGAVLGAIVTIAEGCLIMAACATGPYALVLVPALMYASYKASDYVEEKQNQLESWINSFCDTDGAINTGSENVNINGKPAARAAVTLPPPPPPGAIPEIPQGEPSWGDIATDLLESAAEKAVPLAKAWGNAVITLTESNAGFMDRVSAGASLLFPAGPVLMEFATMVGGRSEIKKDVDFPEAGEDTALCDKENKPPRIAQGSSNVFINNQPAARKGDKLECSAAIVGGSPDVFIGGEQVTYLDIQPEFPPWQRMILGGITIASYLLPPAGLLGKLKNLARLGKLGNLLGKSGKQLGAKLGALLGKTGKSLKSIANKVIRWVTDPVVPVT…
A0A365Q2V2_ECOLX	Type IV secretion protein Rhs	CCU03_023545	Escherichia coli O111:NM	1599	MSEGPGGPQGATAGGTLAMRMLSQQAMVASQMKRAANDKAIAQMLAAKKSGPPAARLGDEIQHKSFLGALAGAVLGAIVTIAEGCLIMAACATGPYALVLVPALMYASYKASDYVEEKQNQLESWINSFCDTDGAINTGSENVNINGKPAARAAVTLPPPPPPGAIPEIPQGEPSWGDIATDLLESAAEKAVPLAKAWGNAVITLTESNAGFMDRVSAGASLLFPAGPVLMEFATMVGGRSEIKKDVDFPEAGEDTALCDKENKPPRIAQGSSNVFINNQPAARKGDKLECSAAIVGGSPDVFIGGEQVTYLDIQPEFPPWQRMILGGITIASYLLPPAGLLGKLKNLARLGKLGNLLGKSGKQLGAKLGALLGKTGKSLKSIANKVIRWVTDPVVPVT…
I2ULT2_ECOLX	RHS repeat-associated core domain protein	EC40522_0630	Escherichia coli 4.0522	1599	MSEGPGGPQGATAGGTLAMRMLSQQAMVASQMKRAANDKAIAQMLAAKKSGPPAARLGDEIQHKSFLGALAGAVLGAIVTIAEGCLIMAACATGPYALVLVPALMYASYKASDYVEEKQNQLESWINSFCDTDGAINTGSENVNINGKPAARAAVTLPPPPPPGAIPEIPQGEPSWGDIATDLLESAAEKAVPLAKAWGNAVITLTESNAGFMDRVSAGASLLFPAGPVLMEFATMVGGRSEIKKDVDFPEAGEDTALCDKENKPPRIAQGSSNVFINNQPAARKGDKLECSAAIVGGSPDVFIGGEQVTYLDIQPEFPPWQRMILGGITIASYLLPPAGLLGKLKNLARLGKLGNLLGKSGKQLGAKLGALLGKTGKSLKSIANKVIRWVTDPVVPVT…
A0A1C9CJL1_ECOLX	Putative deoxyribonuclease RhsA (EC 3.1.-.-) (Rhs core protein) (Type IV secretion protein Rhs)	ct3C rhsA_2 DL800_04825 E2855_00573 E2863_00597 EC95NR1_04796	Escherichia coli	1599	MSEGPGGPQGATAGGTLAMRMLSQQAMVASQMKRAANDKAIAQMLAAKKSGPPAARLGDEIQHKSFLGALAGAVLGAIVTIAEGCLIMAACATGPYALVLVPALMYASYKASDYVEEKQNQLESWINSFCDTDGAINTGSENVNINGKPAARAAVTLPPPPPPGAIPEIPQGEPSWGDIATDLLESAAEKAVPLAKAWGNAVITLTESNAGFMDRVSAGASLLFPAGPVLMEFATMVGGRSEIKKDVDFPEAGEDTALCDKENKPPRIAQGSSNVFINNQPAARKGDKLECSAAIVGGSPDVFIGGEQVTYLDIQPEFPPWQRMILGGITIASYLLPPAGLLGKLKNLARLGKLGNLLGKSGKQLGAKLGALLGKTGKSLKSIANKVIRWVTDPVVPVT…
A0A3W4NYF4_ECOLX	Type IV secretion protein Rhs	CWJ32_10825	Escherichia coli O11	1599	MSEGPGGPQGATAGGTLAMRMLSQQAMVASQMKRAANDKAIAQMLAAKKSGPPAARLGDEIQHKSFLGALAGAVLGAIVTIAEGCLIMAACATGPYALVLVPALMYASYKASDYVEEKQNQLESWINSFCDTDGAINTGSENVNINGKPAARAAVTLPPPPPPGAIPEIPQGEPSWGDIATDLLESAAEKAVPLAKAWGNAVITLTESNAGFMDRVSAGASLLFPAGPVLMEFATMVGGRSEIKKDVDFPEAGEDTALCDKENKPPRIAQGSSNVFINNQPAARKGDKLECSAAIVGGSPDVFIGGEQVTYLDIQPEFPPWQRMILGGITIASYLLPPAGLLGKLKNLARLGKLGNLLGKSGKQLGAKLGALLGKTGKSLKSIANKVIRWVTDPVVPVT…
A0A3W4Y486_ECOLX	Type IV secretion protein Rhs	D6X91_24675	Escherichia coli	1599	MSEGPGGPQGATAGGTLAMRMLSQQAMVASQMKRAANDKAIAQMLAAKKSGPPAARLGDEIQHKSFLGALAGAVLGAIVTIAEGCLIMAACATGPYALVLVPALMYASYKASDYVEEKQNQLESWINSFCDTDGAINTGSENVNINGKPAARAAVTLPPPPPPGAIPEIPQGEPSWGDIATDLLESAAEKAVPLAKAWGNAVITLTESNAGFMDRVSAGASLLFPAGPVLMEFATMVGGRSEIKKDVDFPEAGEDTALCDKENKPPRIAQGSSNVFINNQPAARKGDKLECSAAIVGGSPDVFIGGEQVTYLDIQPEFPPWQRMILGGITIASYLLPPAGLLGKLKNLARLGKLGNLLGKSGKQLGAKLGALLGKTGKSLKSIANKVIRWVTDPVVPVT…
A0A4T7UA04_ECOLX	Type IV secretion protein Rhs	C9Y87_23385	Escherichia coli	1599	MSEGPGGPQGATAGGTLAMRMLSQQAMVASQMKRAANDKAIAQMLAAKKSGPPAARLGDEIQHKSFLGALAGAVLGAIVTIAEGCLIMAACATGPYALVLVPALMYASYKASDYVEEKQNQLESWINSFCDTDGAINTGSENVNINGKPAARAAVTLPPPPPPGAIPEIPQGEPSWGDIATDLLESAAEKAVPLAKAWGNAVITLTESNAGFMDRVSAGASLLFPAGPVLMEFATMVGGRSEIKKDVDFPEAGEDTALCDKENKPPRIAQGSSNVFINNQPAARKGDKLECSAAIVGGSPDVFIGGEQVTYLDIQPEFPPWQRMILGGITIASYLLPPAGLLGKLKNLARLGKLGNLLGKSGKQLGAKLGALLGKTGKSLKSIANKVIRWVTDPVVPVT…
A0A454X3V6_ECOLX	Rhs core protein with extension	wapA_1 SAMEA3752553_00131	Escherichia coli	1620	MSEGPGGPQGATAGGTLAMRMLSQQAMVASQMKRAANDKAIAQMLASKKSGPPAARLGDEIQHKSFLGALAGAVLGAIVTIAEGCLIMAACATGPYALVLVPALMYASYKASDYVEEKQNQLESWINSFCDTDGAINTGSENVKINGELAARAAVTLPPPPPPGAIPEVPQGEPSWGDIATDLLESAAEKAVPLAKAWGNAVITLTDSNAGFMDRVSAGASLLFPAGPVLMEFATMVGGRGEIKKEVDFPEAGEDTALCDKENKPPRIAQGSSNVFINNQPAARKGDKLECSAVIVGGSPDVFIGGEQVTYLDIQPEFPPWQRMILGGITIASYLLPPAGLLGKLKNLARLGKLGNLLGKSGKLLGAKLGALLGKTGKSLKSIANKVIRWVTDPVDPVT…
A0A3Z9J767_ECOLX	Type IV secretion protein Rhs	D9F87_18910	Escherichia coli	1620	MSEGPGGPQGATAGGTLAMRMLSQQAMVASQMKRAANDKAIAQMLASKKSGPPAARLGDEIQHKSFLGALAGAVLGAIVTIAEGCLIMAACATGPYALVLVPALMYASYKASDYVEEKQNQLESWINSFCDTDGAINTGSENVKINGELAARAAVTLPPPPPPGAIPEVPQGEPSWGDIATDLLESAAEKAVPLAKAWGNAVITLTDSNAGFMDRVSAGASLLFPAGPVLMEFATMVGGRGEIKKEVDFPEAGEDTALCDKENKPPRIAQGSSNVFINNQPAARKGDKLECSAVIVGGSPDVFIGGEQVTYLDIQPEFPPWQRMILGGITIASYLLPPAGLLGKLKNLARLGKLGNLLGKSGKLLGAKLGALLGKTGKSLKSIANKVIRWVTDPVDPVT…
E1J162_ECOLX	RHS repeat-associated core domain protein	HMPREF9347_00602	Escherichia coli MS 124-1	1620	MSEGPGGPQGATAGGTLAMRMLSQQAMVASQMKRAANDKAIAQMLASKKSGPPAARLGDEIQHKSFLGALAGAVLGAIVTIAEGCLIMAACATGPYALVLVPALMYASYKASDYVEEKQNQLESWINSFCDTDGAINTGSENVKINGELAARAAVTLPPPPPPGAIPEVPQGEPSWGDIATDLLESAAEKAVPLAKAWGNAVITLTDSNAGFMDRVSAGASLLFPAGPVLMEFATMVGGRGEIKKEVDFPEAGEDTALCDKENKPPRIAQGSSNVFINNQPAARKGDKLECSAVIVGGSPDVFIGGEQVTYLDIQPEFPPWQRMILGGITIASYLLPPAGLLGKLKNLARLGKLGNLLGKSGKLLGAKLGALLGKTGKSLKSIANKVIRWVTDPVDPVT…
D7XX12_ECOLX	RHS repeat-associated core domain protein	HMPREF9536_05640	Escherichia coli MS 84-1	1620	MSEGPGGPQGATAGGTLAMRMLSQQAMVASQMKRAANDKAIAQMLASKKSGPPAARLGDEIQHKSFLGALAGAVLGAIVTIAEGCLIMAACATGPYALVLVPALMYASYKASDYVEEKQNQLESWINSFCDTDGAINTGSENVKINGELAARAAVTLPPPPPPGAIPEVPQGEPSWGDIATDLLESAAEKAVPLAKAWGNAVITLTDSNAGFMDRVSAGASLLFPAGPVLMEFATMVGGRGEIKKEVDFPEAGEDTALCDKENKPPRIAQGSSNVFINNQPAARKGDKLECSAVIVGGSPDVFIGGEQVTYLDIQPEFPPWQRMILGGITIASYLLPPAGLLGKLKNLARLGKLGNLLGKSGKLLGAKLGALLGKTGKSLKSIANKVIRWVTDPVDPVT…
E6BL96_ECOLX	RHS repeat-associated core domain protein	HMPREF9350_03157	Escherichia coli MS 85-1	1620	MSEGPGGPQGATAGGTLAMRMLSQQAMVASQMKRAANDKAIAQMLASKKSGPPAARLGDEIQHKSFLGALAGAVLGAIVTIAEGCLIMAACATGPYALVLVPALMYASYKASDYVEEKQNQLESWINSFCDTDGAINTGSENVKINGELAARAAVTLPPPPPPGAIPEVPQGEPSWGDIATDLLESAAEKAVPLAKAWGNAVITLTDSNAGFMDRVSAGASLLFPAGPVLMEFATMVGGRGEIKKEVDFPEAGEDTALCDKENKPPRIAQGSSNVFINNQPAARKGDKLECSAVIVGGSPDVFIGGEQVTYLDIQPEFPPWQRMILGGITIASYLLPPAGLLGKLKNLARLGKLGNLLGKSGKLLGAKLGALLGKTGKSLKSIANKVIRWVTDPVDPVT…
A0A3T5UD40_ECOLX	Uncharacterized protein (Fragment)	DL705_28530	Escherichia coli	136	MSEGPGGPQGATAGGTLAMRMLSQQAMVASQMKRAANDKAIAQMLAAKKSGPPAARLGDEIQHKSFLGALAGAVLGAIVTIAEGCLIMAACATGPYALVLVPALMYASYKASDYVEEKQNQLESWINSFCDTDGAI
E1IMF2_ECOLX	RHS repeat-associated core domain protein	HMPREF9348_01319	Escherichia coli MS 145-7	1613	MSEGPGGPQGATAGGTLAMRMLSQQAMVASQMKRAANDKAIAQMLASKKSGPPAARLGDEIQHKSFLGALAGAVLGAIVTIAEGCLIMAACATGPYALVLVPALMYASYKASDYVEEKQNQLESWINSFCDTDGAINTGSENVKINGELAARAAVTLPPPPPPGAIPEVPQGEPSWGDIATDLLESAAEKAVPLAKAWGNAVITLTDSNAGFMDRVSAGASLLFPAGPVLMEFATMVGGRGEIKKEVDFPEAGEDTALCDKENKPPRIAQGSSNVFINNQPAARKGDKLECSAVIVGGSPDVFIGGEQVTYLDIQPEFPPWQRMILGGITIASYLLPPAGLLGKLKNLARLGKLGNLLGKSGKLLGAKLGALLGKTGKSLKSIANKVIRWVTDPVDPVT…
A0A1V3VTS2_ECOLX	Rhs core protein with extension	BMT91_22165 FORC82_3487	Escherichia coli	410	MSEGPGGPQGATAGGTLAMRMLSQQAMVASQMKRAANDKAIAQMLAAKKSGPPAARLGDEIQHKSFLGALAGAVLGAIVTIAEGCLIMAACATGPYALVLVPALMYASYKASDYVEEKQNQLESWINSFCDTDGAINTGSENVNINGKPAARAAVTLPPPPPPGAIPEIPQGEPSWGDIATDLLESAAEKAVPLAKAWGNAVITLTESNAGFMDRVSAGASLLFPAGPVLMEFATMVGGRGEIKKDVDFPEAGEDTALCDKENKPPRIAQGSSNVFINNQPAARKGDKLECSAAIVEGSPDVFIGGEQVTYLDIQPEFPPWQRMILGGITIASYLLPPAGLLGKLGNLAKLGKLGNLLGKSGKLLGAKLGALLGKTGKSLKSIANKVIRWVTDPVDPVP…
A0A3T6Q6M9_ECOLX	Type IV secretion protein Rhs (Fragment)	DMI36_25705	Escherichia coli	1373	MSEGPGGPQGATAGGTLAMRMLSQRAMAASQMKRAANDKAIAQMLASKKSGPPAARLGDEIQHKSFLGALAGAVLGAIVTIAEGCLIMAACATGPYALVLVPALMYASYKASDYVEEKQNQLESWINSFCDTDGAINTGSKNVKINGKPAARAAVTLPPPPPPGAIPEVPQGEPSWGDIATDLLESAAEKAVPLAKAWGNAVITLTDSNAGFMDRVSAGASLLFPAGPVLMEFATMVGGRGEIKKDVDFPEAGEDTALCDKENKPPRIAQGSSNVFINNQPAARKGDKLECSAAIVEGSPDVFIGGEQVTYLDIQPEFPPWQRMILGGITIASYLLPPAGLLGKLGNLAKLGKLGNLLGKSGKLLGAKLGALLGKTGNSLKSIANKVIRWVTDPVDPVT…
A0A0K3VLQ9_ECOLX	Rhs core protein with extension	wapA_2 ERS085416_04069 ERS139211_04283	Escherichia coli	1619	MSEGPGGPQGATAGGTLAMRMQSQRAMVASQMKRAANDKAIAQMLAAKKSGPPAARLDDEIQHKSFLGALAGAVLGAIVTIAEGCLIMAACATGPYALVLVPALMYASYKASDYVEEKQNQLESWINSFCDTDGAINTGSENVNINGKPAARAAVTLPPPPPPGAIPEIPQGEPSWGDIATDLLESAAEKAVPLAKAWGNAVITLTESNAGFMDRVSAGASLLFPAGPVLMEFATMVGGRGEIKKDVDFPEAGEDTALCDKENKPPRIAQGSSNVFINNQPAARKGDKLECSAAIVEGSPDVFIGGEQVTYLDIQPEFPPWQRMILGGITIASYLLPPAGLLGKLGNLAKLGKLGNLLGKSGKLLGAKLGALLGKTCKSLKSIANKVIRWVTDPVDPVT…
A0A3V0Y249_ECOLX	Type IV secretion protein Rhs	DRW19_14820	Escherichia coli	1620	MSEGPGGPQGATAGGTLAMRMLSQQAMVASQMKRAANDKAIAQMLASKKSGPPAARLGDEIQHKSFLGALAGAVLGAIVTIAEGCLIMAACATGPYALVLVPALMYASYKASDYVEEKQNQLESWINSFCDTDGAINTGSENVKINGELAARAAVTLPPPPPPGAIPEVPQGEPSWGDIATDLLESAAEKAVPLAKAWGNAVITLTDSNAGFMDRVSAGASLLFPAGPVLMEFATMVGGRGEIKKEVDFPEAGEDTALCDKENKPPRIAQGSSNVFINNQPAARKGDKLECSAVIVGGSPDVFIGGEQVTYLDIQPEFPPWQRMILGGITIASYLLPPAGLLGKLKNLARLGKLGNLLGKSGKLLGAKLGALLGKTGKSLKSIANKVIRWVTDPVDPVT…
A0A3U5KP50_ECOLX	Type IV secretion protein Rhs	D4636_14755 D7Z75_18690 DL975_26880 DM820_27170 DN660_19680 DN689_26805 DN700_26755 DND79_26895 DP267_27190 DQO13_27645 EC496_10745	Escherichia coli	1620	MSEGPGGPQGATAGGTLAMRMLSQQAMVASQMKRAANDKAIAQMLASKKSGPPAARLGDEIQHKSFLGALAGAVLGAIVTIAEGCLIMAACATGPYALVLVPALMYASYKASDYVEEKQNQLESWINSFCDTDGAINTGSENVKINGELAARAAVTLPPPPPPGAIPEVPQGEPSWGDIATDLLESAAEKAVPLAKAWGNAVITLTDSNAGFMDRVSAGASLLFPAGPVLMEFATMVGGRGEIKKEVDFPEAGEDTALCDKENKPPRIAQGSSNVFINNQPAARKGDKLECSAVIVGGSPDVFIGGEQVTYLDIQPEFPPWQRMILGGITIASYLLPPAGLLGKLKNLARLGKLGNLLGKSGKLLGAKLGALLGKTGKSLKSIANKVIRWVTDPVDPVT…
A0A3Z8QVZ0_ECOLX	Type IV secretion protein Rhs	EAY17_18180	Escherichia coli	1601	MSEGPGGPQGATAGGTLAMRMLSQQAMVASQMKRAANDKAIAQMLASKKSGPPAARLGDEIQHKSFLGALAGAVLGAIVTIAEGCLIMAACATGPYALVLVPALMYASYKASDYVEEKQNQLESWINSFCDTDGAINTGSENVKINGELAARAAVTLPPPPPPGAIPEVPQGEPSWGDIATDLLESAAEKAVPLAKAWGNAVITLTDSNAGFMDRVSAGASLLFPAGPVLMEFATMVGGRGEIKKEVDFPEAGEDTALCDKENKPPRIAQGSSNVFINNQPAARKGDKLECSAVIVGGSPDVFIGGEQVTYLDIQPEFPPWQRMILGGITIASYLLPPAGLLGKLKNLARLGKLGNLLGKSGKLLGAKLGALLGKTGKSLKSIANKVIRWVTDPVDPVT…
A0A3Z0VR07_ECOLX	Uncharacterized protein (Fragment)	D9Y10_26125	Escherichia coli	139	MSEGPGGPQGATAGGTLAMRMLSQRAMAASQMKRAANDKAIAQMLASKKSGPPAARLGDEIQHKSFLGALAGAVLGAIVTIAEGCLIMAACATGPYALVLVPALMYASYKASDYVEEKQNQLESWINSFCDTDGAINTG
A0A3W2SEH1_ECOLX	Type IV secretion protein Rhs	D9S00_24015	Escherichia coli	1617	MSEGPGGPQGATAGGTLAMRMLSQQAMVASQMKRAANDKAIAQMLASKKSGPPAARLGDEIQHKSFLGALAGAVLGAIVTIAEGCLIMAACATGPYALVLVPALMYASYKASDYVEEKQNQLESWINSFCDTDGAINTGSENVKINGELAARAAVTLPPPPPPGAIPEVPQGEPSWGDIATDLLESAAEKAVPLAKAWGNAVITLTDSNAGFMDRVSAGASLLFPAGPVLMEFATMVGGRGEIKKEVDFPEAGEDTALCDKENKPPRIAQGSSNVFINNQPAARKGDKLECSAVIVGGSPDVFIGGEQVTYLDIQPEFPPWQRMILGGITIASYLLPPAGLLGKLKNLARLGKLGNLLGKSGKLLGAKLGALLGKTGKSLKSIANKVIRWVTDPVDPVT…
A0A3Z3QKW8_SALET	RHS repeat protein (Fragment)	YI72_22575	Salmonella enterica I	437	MYEAARVDDPIYHTSALAGFLIGAIIGIAIIALAAFALFSCGILAGLILGFMADQIASGVLQLGEAIGRSIHHTAGKILTGSENVSTNSRPAARAVLSTVKCDNHIAEKRIAQGSGNIYINSQPAARKDDHTECDAVIEDGSPNVFLGGGTQTVLEISSEIPDWLRKVVDVLFVVASLLGGLAGAWRQAAKLGTKFGTKCAAKFIGGELTGMAVSEAISGLFSNPVDVTTGQKILLPETDFTLPGRLPVTCSRFYASHLETVGLLGRGWRLNWETSLREDDEHITLTGVQGRELRYPKTMLTPGHQIFDPEEQLYLSRLHDGRYVLHYTDRSYYVFGDFDSDGMAYLLFMETPHRQRIVFGHEGGRLERIASSSGHHLLLHRTQTPAGERLSRIELVQG…
A0A3U2C795_SALET	RHS repeat protein	DN223_09985	Salmonella enterica I	1377	MYEAARVDDPIYHTSALAGFLIGAIIGIAIIALAAFALFTCGFLAGLVLGFLADQIASGVLQLGEAIGRSIHHTAGKILTGSENVSTNSRPAARAVLSTVKCDNHIAEKRIAQGAENIYINSQPAARKDDHTECDAVIEDGSPNVFLGGGTQTVLEISSEIPDWLRKVVDVLFVVAGLLGGLAGAWRQAAKLGTKFGTKCAAKFIGGELTGMAVSEAISGLFSNPVDVTTGQKILLPETDFTLPGRLPVACSRFYASHLETVGLLGRGWRLNWETSLREDDEHLTLTGVQGRELRYPKTMLTPGHQIFDPEEQLYLSRLHDGRYVLHYTDRSYYVFGDFDSDGMAYLRFMETPHRQRIVFGHEGGRLVRIASSSGHHLLLHRTQTPAGERLSRIELVQG…
A0A3X9BAC7_SALET	RHS repeat protein	DS339_08965	Salmonella enterica I	1377	MYEAARVDDPIYHTSALAGFLIGAIIGIAIIALAAFALFTCGFLAGLVLGFLADQIASGVLQLGEAIGRSIHHTAGKILTGSENVSTNSRPAARAVLSTVKCDNHIAEKRIAQGAENIYINSQPAARKDDHTECDAVIEDGSPNVFLGGGTQTVLEISSEIPDWLRKVVDVLFVVAGLLGGLAGAWRQAAKLGTKFGTKCAAKFIGGELTGMAVSEAISGLFSNPVDVTTGQKILLPETDFTLPGRLPVACSRFYASHLETVGLLGRGWRLNWETSLREDDEHLTLTGVQGRELRYPKTMLTPGHQIFDPEEQLYLSRLHDGRYVLHYTDRSYYVFGDFDSDGMAYLRFMETPHRQRIVFGHEGGRLVRIASSSGHHLLLHRTQTPAGERLSRIELVQG…
A0A3M5BAZ6_9PSED	YD repeat protein (Fragment)	ALP71_05731	Pseudomonas coronafaciens pv. garcae	131	MFEAARFGDEISHSGALGGFLIGAVLGIALIATVAIATFTCGFGVALLAGLAAGVGGSLLTAAGEAIGSMFSSPSGTIITASPNVYINNRKAAHVEKSIGACEKHPGPVKIAEGSTNVFINSVAAARKGDK
A0A383HHR4_ECOLX	Rhs core protein	wapA_4 SAMEA3472047_04430	Escherichia coli	1417	MSEGPGGPQGATAGGTLAMRMLSQQAMVASQMKRAANDKAIAQMLAAKKSGPPAARLGDEIQHKSFLGALAGAVLGAIVTIAEGCLIMAACATGPYALVLVPALMYASYKASDYVEEKQNQLESWINSFCDTDGAINTGSENVNINGKPAARAAVTLPPPPPPGAIPEIPQGEPSWGDIATDLLESAAEKAVPLAKAWGNAVITLTESNAGFMDRVSAGASLLFPAGPVLMEFATMVGGRGEIKKDVDFPEAGEDTALCDKENKPPRIAQGSSNVFINNQPAARKGDKLECSAAIVEGSPDVFIGGEQVTYLDIQPEFPPWQRMILGGITIASYLLPPAGLLGKLGNLAKLGKLGNLLGKSGKLLGAKLGALLGKTGKSLKSIANKVIRWVTDPVDPVT…
T9DMS4_ECOLX	Uncharacterized protein	G943_00270	Escherichia coli UMEA 3212-1	1417	MSEGPGGPQGATAGGTLAMRMLSQQAMVASQMKRAANDKAIAQMLAAKKSGPPAARLGDEIQHKSFLGALAGAVLGAIVTIAEGCLIMAACATGPYALVLVPALMYASYKASDYVEEKQNQLESWINSFCDTDGAINTGSENVNINGKPAARAAVTLPPPPPPGAIPEIPQGEPSWGDIATDLLESAAEKAVPLAKAWGNAVITLTESNAGFMDRVSAGASLLFPAGPVLMEFATMVGGRGEIKKDVDFPEAGEDTALCDKENKPPRIAQGSSNVFINNQPAARKGDKLECSAAIVEGSPDVFIGGEQVTYLDIQPEFPPWQRMILGGITIASYLLPPAGLLGKLGNLAKLGKLGNLLGKSGKLLGAKLGALLGKTGKSLKSIANKVIRWVTDPVDPVT…
A0A3T5CMW9_ECOLX	Type IV secretion protein Rhs	D4718_20290 D9E58_21350 DL297_19510 ED146_19455	Escherichia coli	1417	MSEGPGGPQGATAGGTLAMRMLSQQAMVASQMKRAANDKAIAQMLAAKKSGPPAARLGDEIQHKSFLGALAGAVLGAIVTIAEGCLIMAACATGPYALVLVPALMYASYKASDYVEEKQNQLESWINSFCDTDGAINTGSENVNINGKPAARAAVTLPPPPPPGAIPEIPQGEPSWGDIATDLLESAAEKAVPLAKAWGNAVITLTESNAGFMDRVSAGASLLFPAGPVLMEFATMVGGRGEIKKDVDFPEAGEDTALCDKENKPPRIAQGSSNVFINNQPAARKGDKLECSAAIVEGSPDVFIGGEQVTYLDIQPEFPPWQRMILGGITIASYLLPPAGLLGKLGNLAKLGKLGNLLGKSGKLLGAKLGALLGKTGKSLKSIANKVIRWVTDPVDPVT…
L3QDQ8_ECOLX	YD repeat (Two copies)	A1UM_00814	Escherichia coli KTE75	1379	MSEGPGGPQGATAGGTLAMRMLSQQAMVASQMKRAANDKAIAQMLAAKKSGPPAARLGDEIQHKSFLGALAGAVLGAIVTIAEGCLIMAACATGPYALVLVPALMYASYKASDYVEEKQNQLESWINSFCDTDGAINTGSENVKINGKPAARAAVTLPPPPLTEAIPSPPQGEPSWGDIATDLLESAAEKAVPLAKAWGNAVITLTDSNAGIMDRVSAGASLLFPAGPVLMEFATMVGGRGEIKKDVDFPEAGEDTALCDKENKPPRIAQGSSNVFINNQPAARKGDKLECSAAIVEGSPDVFIGGEQVTYLDIQPEFPPWQRMILGGITIASYLLPPAGLLGKLGNLAKLGKLGNLLGKSGKLLGAKLGALLGKTGKSLKSIANKVIRWVTDPVDPVT…
E3PGH4_ECOH1	Putative RHS repeat protein	ETEC_0595	Escherichia coli O78:H11 (strain H10407 / ETEC)	1417	MSEGPGGPQGATAGGTLAMRMLSQQAMVASQMKRAANDKAIAQMLAAKKSGPPAARLGDEIQHKSFLGALAGAVLGAIVTIAEGCLIMAACATGPYALVLVPALMYASYKASDYVEEKQNQLESWINSFCDTDGAINTGSENVNINGKPAARAAVTLPPPPPPGAIPEIPQGEPSWGDIATDLLESAAEKAVPLAKAWGNAVITLTESNAGFMDRVSAGASLLFPAGPVLMEFATMVGGRGEIKKDVDFPEAGEDTALCDKENKPPRIAQGSSNVFINNQPAARKGDKLECSAAIVEGSPDVFIGGEQVTYLDIQPEFPPWQRMILGGITIASYLLPPAGLLGKLGNLAKLGKLGKLLGKSGKLLGAKLGALLGKTGKSLKSIANKVIRWVTDPVDPVT…
F4NMV6_ECOLX	Uncharacterized protein	SSJG_03447	Escherichia coli D9	476	MSEGPGGPQGATAGGTLAMRMLSQQAMVASQMKRAANDKAIAQMLASKKSGPPAARLGDEIQHKSFLGALAGAVLGAIVTIAEGCLIMAACATGPYALVLVPALMYASYKASDYVEEKQNQLESWINSFCDTDGAINTGSENVKINGELAARAAVTLPPPPPPGAIPEVPQGEPSWGDIATDLLESAAEKAVPLAKAWGNAVITLTDSNAGFMDRVSAGASLLFPAGPVLMEFATMVGGRGEIKKEVDFPEAGEDTALCDKENKPPRIAQGSSNVFINNQPAARKGDKLECSAVIVGGSPDVFIGGEQVTYLDIQPEFPPWQRMILGGITIASYLLPPAGLLGKLKNLARLGKLGNLLGKSGKLLGAKLGALLGKTGKSLKSIANKVIRWVTDPVDPVT…
A0A0E1L4J4_ECOLX	Member of the Rhs family protein (Rhs core protein) (Sugar-binding protein)	AC789_1c06020 BON76_07955 SAMEA3472114_01109 SAMEA3753064_01384 SAMEA3753290_01873	Escherichia coli	698	MSEGPGGPQGATAGGTLAMRMLSQQAMVASQMKRAANDKAIAQMLASKKSGPPAARLGDEIQHKSFLGALAGAVLGAIVTIAEGCLIMAACATGPYALVLVPALMYASYKASDYVEEKQNQLESWINSFCDTDGAINTGSENVKINGKPAARAAVTLPPPPPPGAIPEVPQGEPSWGDIATDLLESAAEKAVPLAKAWGNAVITLTDSNAGFMDRVSAGASLLFPAGPVLMEFATMVGGRGEIKKDVDFPEAGEDTALCDKENKPPRIAQGSSNVFINNQPAARQGDKLECSAAIVGGSPDVFIGGEQVTYLDIQPEFPPWQRMILGGITIASYLLPPAGLLGKLKNLARLGKLGNLLGKSGKLLGAKLGALLGKTGKSLKSIANKVIRWVTDPVDPVT…
A0A0U4BB23_ECOLX	YD repeat protein	ACN002_0581	Escherichia coli	698	MSEGPGGPQGATAGGTLAMRMLSQQAMVASQMKRAANDKTIAQMLASKKSGPPAARLGDEIQHKSFLGALAGAVLGAIVTIAEGCLIMAACATGPYALVLVPALMYASYKASDYVEEKQNQLESWINSFCDTDGAINTGSENVKINGKPAARAAVTLPPPPPPGAIPEVPQGEPSWGDIATDLLESAAEKAVPLAKAWGNAVITLTDSNAGFMDRVSAGASLLFPAGPVLMEFATMVGGRGEIKKDVDFPEAGEDTALCDKENKPPRIAQGSSNVFINNQPAARQGDKLECSAAIVGGSPDVFIGGEQVTYLDIQPEFPPWQRMILGGITIASYLLPPAGLLGKLKNLARLGKLGNLLGKSGKLLGAKLGALLGKTGKSLKSIANKVIRWVTDPVDPVT…
V0YFR8_ECOLX	Uncharacterized protein (Fragment)	HMPREF1611_04303	Escherichia coli 908573	252	MSEGPGGPQGATAGGTLAMRMLSQQAMVASQMKRAANDKAIAQMLASKKSGPPAARLGDEIQHKSFLGALAGAVLGAIVTIAEGCLIMAACATGPYALVLVPALMYASYKASDYVEEKQNQLESWINSFCDKDGAINTGSKNVNINGKPAARAAVTLPPPPLTEAIPSPPQGEPSWGDIATDLLESAAEKAVPLAKAWGNAIITLTDNNAGIMDRVSAGASLLFPAGPVLMEFATMVGGRGEIKKDVDFPEA
A0A3Z9R6K7_ECOLX	Type IV secretion protein Rhs	D9K00_23235	Escherichia coli	1505	MSEGPGGPQGATAGGTLAMRMLSQQAMVASQMKRAANDKAIAQMLAAKKSGPPAARLGDEIQHKSFLGALAGAVLGAIVTIAEGCLIMAACATGPYALVLVPALMYASYKASDYVEEKQNQLESWINSFCDTDGAINTGSENVNINGKPAARAAVTLPPPPPPGAIPEIPQGEPSWGDIATDLLESAAEKAVPLAKAWGNAVITLTESNAGFMDRVSAGASLLFPAGPVLMEFATMVGGRGEIKKDVDFPEAGEDTALCDKENKPPRIAQGSSNVFINNQPAARKGDKLECSAAIVEGSPDVFIGGEQVTYLDIQPEFPPWQRMILGGITIASYLLPPAGLLGKLGNLAKLGKLGNLLGKSGKLLGAKLGALLGKTGKSLKSIANKVIRWVTDPVDPVT…
A0A1V2FYE8_ECOLX	Type IV secretion protein Rhs	BW690_16600	Escherichia coli	1505	MSEGPGGPQGATAGGTLAMRMLSQQAMVASQMKRAANDKAIAQMLAAKKSGPPAARLGDEIQHKSFLGALAGAVLGAIVTIAEGCLIMAACATGPYALVLVPALMYASYKASDYVEEKQNQLESWINSFCDTDGAINTGSENVNINGKPAARAAVTLPPPPPPGAIPEIPQGEPSWGDIATDLLESAAEKAVPLAKAWGNAVITLTESNAGFMDRVSAGASLLFPAGPVLMEFATMVGGRGEIKKDVDFPEAGEDTALCDKENKPPRIAQGSSNVFINNQPAARKGDKLECSAAIVEGSPDVFIGGEQVTYLDIQPEFPPWQRMILGGITIASYLLPPAGLLGKLGNLAKLGKLGNLLGKSGKLLGAKLGALLGKTGKSLKSIANKVIRWVTDPVDPVT…
A0A485D0T9_ECOLX	Rhs core protein	wapA_4 NCTC10963_03357	Escherichia coli	1505	MSEGPGGPQGATAGGTLAMRMLSQQAMVASQMKRAANDKAIAQMLAAKKSGPPAARLGDEIQHKSFLGALAGAVLGAIVTIAEGCLIMAACATGPYALVLVPALMYASYKASDYVEEKQNQLESWINSFCDTDGAINTGSENVNINGKPAARAAVTLPPPPPPGAIPEIPQGEPSWGDIATDLLESAAEKAVPLAKAWGNAVITLTESNAGFMDRVSAGASLLFPAGPVLMEFATMVGGRGEIKKDVDFPEAGEDTALCDKENKPPRIAQGSSNVFINNQPAARKGDKLECSAAIVEGSPDVFIGGEQVTYLDIQPEFPPWQRMILGGITIASYLLPPAGLLGKLGNLAKLGKLGNLLGKSGKLLGAKLGALLGKTGKSLKSIANKVIRWVTDPVDPVT…
A0A3K4C1F0_ECOLX	Type IV secretion protein Rhs	D9I18_24040	Escherichia coli	1505	MSEGPGGPQGATAGGTLAMRMLSQQAMVASQMKRAANDKAIAQMLAAKKSGPPAARLGDEIQHKSFLGALAGAVLGAIVTIAEGCLIMAACATGPYALVLVPALMYASYKASDYVEEKQNQLESWINSFCDTDGAINTGSENVNINGKPAARAAVTLPPPPPPGAIPEIPQGEPSWGDIATDLLESAAEKAVPLAKAWGNAVITLTESNAGFMDRVSAGASLLFPAGPVLMEFATMVGGRGEIKKDVDFPEAGEDTALCDKENKPPRIAQGSSNVFINNQPAARKGDKLECSAAIVEGSPDVFIGGEQVTYLDIQPEFPPWQRMILGGITIASYLLPPAGLLGKLGNLAKLGKLGNLLGKSGKLLGAKLGALLGKTGKSLKSIANKVIRWVTDPVDPVT…
A0A376YGG7_ECOLX	Rhs core protein (Type IV secretion protein Rhs)	wapA_5 EXX71_23275 NCTC9117_04526	Escherichia coli	1505	MSEGPGGPQGATAGGTLAMRMLSQQAMVASQMKRAANDKAIAQMLAAKKSGPPAARLGDEIQHKSFLGALAGAVLGAIVTIAEGCLIMAACATGPYALVLVPALMYASYKASDYVEEKQNQLESWINSFCDTDGAINTGSENVNINGKPAARAAVTLPPPPPPGAIPEIPQGEPSWGDIATDLLESAAEKAVPLAKAWGNAVITLTESNAGFMDRVSAGASLLFPAGPVLMEFATMVGGRGEIKKDVDFPEAGEDTALCDKENKPPRIAQGSSNVFINNQPAARKGDKLECSAAIVEGSPDVFIGGEQVTYLDIQPEFPPWQRMILGGITIASYLLPPAGLLGKLGNLAKLGKLGNLLGKSGKLLGAKLGALLGKTGKSLKSIANKVIRWVTDPVDPVT…
A0A0E1LUI8_ECOLX	RhsD protein in rhs element	EC1303_c05390	Escherichia coli 1303	1505	MSEGPGGPQGATAGGTLAMRMLSQQAMVASQMKRAANDKAIAQMLAAKKSGPPAARLGDEIQHKSFLGALAGAVLGAIVTIAEGCLIMAACATGPYALVLVPALMYASYKASDYVEEKQNQLESWINSFCDTDGAINTGSENVNINGKPAARAAVTLPPPPPPGAIPEIPQGEPSWGDIATDLLESAAEKAVPLAKAWGNAVITLTESNAGFMDRVSAGASLLFPAGPVLMEFATMVGGRGEIKKDVDFPEAGEDTALCDKENKPPRIAQGSSNVFINNQPAARKGDKLECSAAIVEGSPDVFIGGEQVTYLDIQPEFPPWQRMILGGITIASYLLPPAGLLGKLGNLAKLGKLGNLLGKSGKLLGAKLGALLGKTGKSLKSIANKVIRWVTDPVDPVT…
A0A376RVR1_ECOLX	Rhs core protein	wapA_2 NCTC11022_00854	Escherichia coli	1505	MSEGPGGPQGATAGGTLAMRMLSQQAMVASQMKRAANDKAIAQMLAAKKSGPPAARLGDEIQHKSFLGALAGAVLGAIVTIAEGCLIMAACATGPYALVLVPALMYASYKASDYVEEKQNQLESWINSFCDTDGAINTGSENVNINGKPAARAAVTLPPPPPPGAIPEIPQGEPSWGDIATDLLESAAENAVPLAKAWGNAVITLTESNAGFMDRVSAGASLLFPAGPVLMEFATMVGGRGEIKKDVDFPEAGEDTALCDKENKPPRIAQGSSNVFINNQPAARKGDKLECSAAIVEGSPDVFIGGEQVTYLDIQPEFPPWQRMILGGITIASYLLPPAGLLGKLGNLAKLGKLGNLLGKSGKLLGAKLGALLGKTGKSLKSIANKVIRWVTDPVDPVT…
A0A3W5E2V0_ECOLX	Type IV secretion protein Rhs (Fragment)	EG423_24040	Escherichia coli	1506	MSEGPGGPQGATAGGTLAMRMLSQRAMAASQMKRAANDKAIAQMLASKKSGPPAARLGDEIQHKSFLGALAGAVLGAIVTIAEGCLIMAACATGPYALVLVPALMYASYKASDYVEEKQNQLESWINSFCDTDGAINTGSKNVKINGKPAARAAVTLPPPPPPGAIPEVPQGEPSWGDIATDLLESAAEKAVPLAKAWGNAVITLTDSNAGFMDRVSAGASLLFPAGPVLMEFATMVGGRGEIKKDVDFPEAGEDTALCDKENKPPRIAQGSSNVFINNQPAARKGDKLECSAAIVEGSPDVFIGGEQVTYLDIQPEFPPWQRMILGGITIASYLLPPAGLLGKLGNLAKLGKLGNLLGKSGKLLGAKLGALLGKTGNSLKSIANKVIRWVTDPVDPVT…
A0A3Z0P500_ECOLX	Type IV secretion protein Rhs	DT038_23930 DTY68_24080	Escherichia coli	1505	MSEGPGGPQGATAGGTLAMRMLSQQAMVASQMKRAANDKAIAQMLAAKKSGPPAARLGDEIQHKSFLGALAGAVLGAIVTIAEGCLIMAACATGPYALVLVPALMYASYKASDYVEEKQNQLESWINSFCDTDGAINTGSENVNINGKPAARAAVTLPPPPPPGAIPEIPQGEPSWGDIATDLLESAAEKAVPLAKAWGNAVITLTESNAGFMDRVSAGASLLFPAGPVLMEFATMVGGRGEIKKDVDFPEAGEDTALCDKENKPPRIAQGSSNVFINNQPAARKGDKLECSAAIVEGSPDVFIGGEQVTYLDIQPEFPPWQRMILGGITIASYLLPPAGLLGKLGNLAKLGKLGNLLGKSGKLLGAKLGALLGKTGKSLKSIANKVIRWVTDPVDPVT…
A0A2K4PCC7_ECOLX	Rhs core protein with extension	EC1094V2_3312	Escherichia coli	1505	MSEGPGGPQGATAGGTLAMRMLSQQAMVASQMKRAANDKAIAQMLAAKKSGPPAARLGDEIQHKSFLGALAGAVLGAIVTIAEGCLIMAACATGPYALVLVPALMYASYKASDYVEEKQNQLESWINSFCDTDGAINTGSENVNINGKPAARAAVTLPPPPPPGAIPEIPQGEPSWGDIATDLLESAAEKAVPLAKAWGNAVITLTESNAGFMDRVSAGASLLFPAGPVLMEFATMVGGRGEIKKDVDFPEAGEDTALCDKENKPPRIAQGSSNVFINNQPAARKGDKLECSAAIVEGSPDVFIGGEQVTYLDIQPEFPPWQRMILGGITIASYLLPPAGLLGKLGNLAKLGKLGNLLGKSGKLLGAKLGALLGKTGKSLKSIANKVIRWVTDPVDPVT…
A0A2X7ELK0_ECOLX	Rhs core protein (Type IV secretion protein Rhs)	wapA_2 D9J11_02960 SAMEA3752557_00377	Escherichia coli	1505	MSEGPGGPQGATAGGTLAMRMLSQQAMVASQMKRAANDKAIAQMLAAKKSGPPAARLGDEIQHKSFLGALAGAVLGAIVTIAEGCLIMAACATGPYALVLVPALMYASYKASDYVEEKQNQLESWINSFCDTDGAINTGSENVNINGKPAARAAVTLPPPPPPGAIPEIPQGEPSWGDIATDLLESAAEKAVPLAKAWGNAVITLTESNAGFMDRVSAGASLLFPAGPVLMEFATMVGGRGEIKKDVDFPEAGEDTALCDKENKPPRIAQGSSNVFINNQPAARKGDKLECSAAIVEGSPDVFIGGEQVTYLDIQPEFPPWQRMILGGITIASYLLPPAGLLGKLGNLAKLGKLGNLLGKSGKLLGAKLGALLGKTGKSLKSIANKVIRWVTDPVDPVT…
A0A3Y5KUZ0_ECOLX	Type IV secretion protein Rhs	DTX25_16265	Escherichia coli	1482	MSEGPGGPQGATAGGTLAMRMLSQQAMVASQMKRAANDKAIAQMLAAKKSGPPAARLGDEIQHKSFLGALAGAVLGAIVTIAEGCLIMAACATGPYALVLVPALMYASYKASDYVEEKQNQLESWINSFCDTDGAINTGSENVNINGKPAARAAVILPPPPPPGAIPEVPQGEPSWGDIATDLLESAAEKAVPLAKAWGNAVITLTDSNAGFMDRVSAGASLLFPAGPVLMEFATMVGGRGEIKKDVDFPEAGEDTALCDKENKPPRIAQGSSNVFINNQPAARKGDKLECSAAIVEGSPDVFIGGEQVTYLDIQLEFPPWQRMILGGITIASYLLPPAGLLGKLGNLARLGKLGNLLGKSGKLLGAKLGALLGKTGKSLKSIANKVIRWVTDPVDPVT…
A0A4C4DWQ2_ECOLX	Type IV secretion protein Rhs	BvCmsHHP001_02093	Escherichia coli	1505	MSEGPGGPQGATAGGTLAMRMLSQQAMVASQMKRAANDKAIAQMLAAKKSGPPAARLGDEIQHKSFLGALAGAVLGAIVTIAEGCLIMAACATGPYALVLVPALMYASYKASDYVEEKQNQLESWINSFCDTDGAINTGSENVNINGKPAARAAVTLPPPPPPGAIPEIPQGEPSWGDIATDLLESAAEKAVPLAKAWGNAVITLTESNAGFMDRVSAGASLLFPAGPVLMEFATMVGGRGEIKKDVDFPEAGEDTALCDKENKPPRIAQGSSNVFINNQPAARKGDKLECSAAIVEGSPDVFIGGEQVTYLDIQPEFPPWQRMILRGITIASYLLPPAGLLGKLGNLAKLGKLGNLLGKSGKLLGAKLGALLGKTGKSLKSIANKVIRWVTDPVDPVT…
A0A4T9DCD8_ECOLX	Type IV secretion protein Rhs	BvCmsKKP061_03302 BvCmsKSP045_04626 BvCmsKSP067_05045	Escherichia coli	1505	MSEGPGGPQGATAGGTLAMRMLSQQAMVASQMKRAANDKAIAQMLAAKKSGPPAARLGDEIQHKSFLGALAGAVLGAIVTIAEGCLIMAACATGPYALVLVPALMYASYKASDYVEEKQNQLESWINSFCDTDGAINTGSENVNINGKPAARAAVTLPPPPPPGAIPEVPQGEPSWGDIATDLLESAAEKAVPLAKAWGNAVITLTDSNAGFMDRVSAGASLLFPAGPVLMEFATMVGGRGEIKKDVDFPEAGEDTALCDKENKPPRIAQGSSNVFINNQPAARKGDKLECSAAIVEGSPDVFIGGEQVTYLDIQLEFPPWQRMILGGITIASYLLPPAGLLGKLGNLARLGKLGNLLGKSGKLLGAKLGALLGKTGKSLKSIANKVIRWVTDPVDPVT…
A0A4D2MTI2_ECOLX	Type IV secretion protein Rhs	BvCmsNSP047_01770 DXT71_02170	Escherichia coli	1505	MSEGPGGPQGATAGGTLAMRMLSQQAMVASQMKRAANDKAIAQMLAAKKSGPPAARLGDEIQHKSFLGALAGAVLGAIVTIAEGCLIMAACATGPYALVLVPALMYASYKASDYVEEKQNQLESWINSFCDTDGAINTGSENVNINGKPAARAAVTLPPPPPPGAIPEVPQGEPSWGDIATDLLESAAEKAVPLAKAWGNAVITLTDSNAGFMDRVSAGASLLFPAGPVLMEFATMVGGRGEIKKDVDFPEAGEDTALCDKENKPPRIAQGSSNVFINNQPAARKGDKLECSAAIVEGSPDVFIGGEQVTYLDIQLEFPPWQRMILGGITIASYLLPPAGLLGKLGNLARLGKLGNLLGKSGKLLGAKLGALLGKTGKSLKSIANKVIRWVTDPVDPVT…
A0A0C2EY91_ECOLX	Type IV secretion protein Rhs	BvCmsKSP011_05091 BvCmsKSP024_04784 WR15_03615	Escherichia coli	1505	MSEGPGGPQGATAGGTLAMRMLSQQAMVASQMKRAANDKAIAQMLAAKKSGPPAARLGDEIQHKSFLGALAGAVLGAIVTIAEGCLIMAACATGPYALVLVPALMYASYKASDYVEEKQNQLESWINSFCDTDGAINTGSENVNINGKPAARAAVTLPPPPPPGAIPEVPQGEPSWGDIATDLLESAAEKAVPLAKAWGNAVITLTDSNAGFMDRVSAGASLLFPAGPVLMEFATMVGGRGEIKKDVDFPEAGEDTALCDKENKPPRIAQGSSNVFINNQPAARKGDKLECSAAIVEGSPDVFIGGEQVTYLDIQLEFPPWQRMILGGITIASYLLPPAGLLGKLGNLARLGKLGNLLGKSGKLLGAKLGALLGKTGKSLKSIANKVIRWVTDPVDPVT…
A0A0A0FEQ5_ECOLX	Rhs-family protein	EL76_3510	Escherichia coli G3/10	548	MSEGPGGPQGATAGGTLAMRMLSQQALVASQMKRAANDKAIAQMLAAKKSGPPAARLGDEIQHKSFLGALAGAVLGAIVTIAEGCLIMAACATGPYALVLVPALMYASYKASDYVEEKQNQLESWINSFCDTDGAINTGSENVKINGELAARAAVTLPPPPPPGAIPEVPQGEPSWGDIATDLLESAAEKAVPLAKAWGNAVITLTDSNAGFMDRVSAGASLLFPAGPVLMEFATMVGGRGEIKKEVDFPEAGEDTALCDKETKPPRIAQGSSNVFINNQPAARKGDKLECSAAIVGGSPDVFIGGEQVTYLDIQPEFPPWQRMILGGITIASYLLPPAGLLGKLKNLARLGKLGNLLGKSGKLLGAKLGALLGKTGKSLKSIANKVIRWVTDPVDPVT…
A0A0K3US74_ECOLX	Rhs core protein with extension	wapA_3 ERS085374_05197	Escherichia coli	1505	MSEGPGGPQGATAGGTLAMRMLSQQAMVASQMKRAANDKAIAQMLAAKKSGPPAARLGDEIQHKSFLGALAGAVLGAIVTIAEGCLIMAACATGPYALVLVPALMYASYKASDYVEEKQNQLESWINSFCDTDGAINTGSENVNINGKPAARAAVTLPPPPPPGAIPEVPQGEPSWGDIATDLLESAAEKAVPLAKAWGNAVITLTDSNAGFMDRVSAGASLLFPAGPVLMEFATMVGGRGEIKKDVDFPEAGEDTALCDKENKPPRIAQGSSNVFINNQPAARKGDKLECSAAIVEGSPDVFIGGEQVTYLDIQLEFPPWQRMILGGITIASYLLPPAGLLGKLGNLARLGKLGNLLGKSGKLLGAKLGALLGKTGKSLKSIANKVIRWVTDPVDPVT…
A0A3U9LC02_SALET	RHS repeat protein (Fragment)	DQ017_20155	Salmonella enterica I	921	MYEAARVDDPVYHTSALAGFLIGAIIGIAIIALAAFAFFSCGFLAGLILGFMADQIASGVLQLGEAIGRSIHHTAGKILTGSENVSTNSRPAARAVLSTVKCDNHIAEKRIAQGSENIYINSQPAARKDDHTECDAVIEDGSPNVFLGGGTQTVLEISSEIPDWLRKVVDVLFVVASLLGGLAGAWRQAAKLGTKFGTKCAAKFIGGELTGMAVSEAISGLFSNPVDVTTGQKILLPETDFTLPGRLPVACSRFYASHLETVGLLGRGWRLNWETSLREDDEHLTLTGVQGRELRYPKTMLTPGHQIFDPEEQLYLSRLHDGRYVLHYTDRSYYVFGDFDSDGMAYLRFMETPHRQRIVFGHEGGRLVRIASSSGHHLLLHRTQTPAGERLSRIELVQG…
A0A376L0G4_ECOLX	Rhs core protein	NCTC10418_05445	Escherichia coli	253	MSEGPGGPQGATAGGTLAMRMLSQQAMVASQMKRAANDKAIAQMLASKKSGPPAARLGDEIQHKSFLGALAGAVLGAIVTIAEGCLIMAACATGPYALVLVPALMYASYKASDYVEEKQNQLESWINSFCDTDGAINTGSENVKINGKPAARAAVTLPPPPPPGAIPEVPQGEPSWGDIATDLLESAAEKAVPLAKAWGNAVITLTDSNAGFMDRVSAGASLLFPRRSGINGVCHHGGRAWRNQKRCGFPGSR
A0A4T3TJJ9_ECOLX	Type IV secretion protein Rhs (Fragment)	C9306_25300	Escherichia coli	544	MSEGPGGPQGATAGGTLAMRMLSQQAMVASQMKRAANDKAIAQMLAAKKSGPPAARLGDEIQHKSFLGALAGAVLGAIVTIAEGCLIMAACATGPYALVLVPALMYASYKASDYVEEKQNQLESWINSFCDTDGAINTGSENVNINGKPAARAAVTLPPPPPPGAIPEIPQGEPSWGDIATDLLESAAEKAVPLAKAWGNAVITLTESNAGFMDRVSAGASLLFPAGPVLMEFATMVGGRSEIKKDVDFPEAGEDTALCDKENKPPRIAQGSSNVFINNQPAARKGDKLECSAAIVGGSPDVFIGGEQVTYLDIQPEFPPWQRMILGGITIASYLLPPAGLLGKLKNLARLGKLGNLLGKSGKLLGAKLGALLGKTGKSLKSIANKVIRWVTDPVDPVT…
A0A478GVF9_ECOLX	Type IV secretion protein Rhs	BvCms12BK_04668	Escherichia coli	269	MSEGPGGPQGATAGGTLAMRMLSQQAMVASQMKRAANDKAIAQMLASKKSGPPAARLGDEIQHKSFLGALAGAVLGAIVTIAEGCLIMAACATGPYALVLVPALMYASYKASDYVEEKQNQLESWINSFCDTDGAINTGSENVKINGELAARAAVTLPPPPPPGAIPEIPQGEPSWGDIATDLLESAAEKAVPLAKAWGNAVITLTDSNAGFMDRVSAGASLLFPAGPVLMEFATMVGGRGEIKKDVDFPEAGEDTALCDKENKPPRIA
A0A4D4G063_ECOLX	Type IV secretion protein Rhs	BvCmsSIP019_03526	Escherichia coli	284	MSEGPGGPQGATAGGTLAMRMLSQQAMVASQMKRAANDKAIAQMLASKKSGPPAARLGDEIQHKSFLGALAGAVLGAIVTIAEGCLIMAACATGPYALVLVPALMYASYKASDYVEEKQNQLESWINSFCDTDGAINTGSENVKINGKPAARAAVTLPPPPPPGAIPEVPQGEPSWGDIATDLLESAAEKAVPLAKAWGNAVITLTDSNAGFMDRVSAGASLLFPAGPVLMEFATMVGGRGEIKKDVDFPEAGEDTALCDKENKPPRIAQGSSNVFINNQPAAR
A0A3Y8DHZ4_ECOLX	Type IV secretion protein Rhs	D4610_25925	Escherichia coli	1574	MSEGPGGPQGATAGGTLAMRMLSQRAMAASQMKRAANDKAIAQMLASKKSGPPAARLGDEIQHKSFLGALAGAVLGAIVTIAEGCLIMAACATGPYALVLVPALMYASYKASDYVEEKQNQLESWINSFCDTDGAINTGSKNVKINGKPAARAAVTLPPPPPPGAIPEVPQGEPSWGDIATDLLESAAEKAVPLAKAWGNAVITLTDSNAGFMDRVSAGASLLFPAGPVLMEFATMVGGRGEIKKDVDFPEAGEDTALCDKENKPPRIAQGSSNVFINNQPAARKGDKLECSAAIVEGSPDVFIGGEQVTYLDIQPEFPPWQRMILGGITIASYLLPPAGLLGKLGNLAKLGKLGNLLGKSGKLLGAKLGALLGKTGNSLKSIANKVIRWVTDPVDPVT…
A0A3W5LED0_ECOLX	Type IV secretion protein Rhs (Fragment)	D6W32_15550	Escherichia coli	1580	MSEGPGGPQGATAGGTLAMRMLSQRAMAASQMKRAANDKAIAQMLASKKSGPPAARLGDEIQHKSFLGALAGAVLGAIVTIAEGCLIMAACATGPYALVLVPALMYASYKASDYVEEKQNQLESWINSFCDTDGAINTGSKNVKINGKPAARAAVTLPPPPPPGAIPEVPQGEPSWGDIATDLLESAAEKAVPLAKAWGNAVITLTDSNAGFMDRVSAGASLLFPAGPVLMEFATMVGGRGEIKKDVDFPEAGEDTALCDKENKPPRIAQGSSNVFINNQPAARKGDKLECSAAIVEGSPDVFIGGEQVTYLDIQPEFPPWQRMILGGITIASYLLPPAGLLGKLGNLAKLGKLGNLLGKSGKLLGAKLGALLGKTGNSLKSIANKVIRWVTDPVDPVT…
A0A3M2XII7_PSESY	YD repeat protein (Fragment)	ALQ91_05067	Pseudomonas syringae pv. syringae	124	MFEAARFGDEISHTGALGGFLIGAVLGIALIATVAIATFTCGFGVALLAGLAAGVGGSLLTAAGEAIGSMFSSPSGTIITASPNVYINNRKAAHVEKSIGACDKHPGPVKIAEGSTNVFINSVA
A0A3Z7ZDV9_ECOLX	Type IV secretion protein Rhs	D5Q66_24895	Escherichia coli	1505	MSEGPGGPQGATAGGTLAMRMLSQQAMVASQMKRAANDKAIAQMLAAKKSGPPAARLGDEIQHKSFLGALAGAVLGAIVTIAEGCLIMAACATGPYALVLVPALMYASYKASDYVEEKQNQLESWINSFCDTDGAINTGSENVNINGKPAARAAVTLPPPPPPGAIPEVPQGEPSWGDIATDLLESAAEKAVPLAKAWGNAVITLTDSNAGFMDRLCAGTSLLFPAGPVLMEFATMVGGRGEIKKDVDFPEAGEDTALCDKENKPPRIAQGSSNVFINNQPAARKGDKLECSAAIVEGSPDVFIGGEQVTYLDIQPEFPPWQRMILGGITIASYLLPPAGLLGKLGNLAKLGKLGNLLGKSGKLLGAKLGALLSRTKNALKNTYNVLKKFIKDPVDPVT…
A0A400BAB5_ECOLX	Type IV secretion protein Rhs	D9G56_23325	Escherichia coli	1505	MSEGPGGPQGATAGGTLAMRMLSQQAMVASQMKRAANDKAIAQMLAAKKSGPPAARLGDEIQHKSFLGALAGAVLGAIVTIAEGCLIMAACATGPYALVLVPALMYASYKASDYVEEKQNQLESWINSFCDTDGAINTGSENVNINGKPAARAAVTLPPPPPPGAIPEVPQGEPSWGDIATDLLESAAEKAVPLAKAWGNAVITLTDSNAGFMDRLCAGTSLLFPAGPVLMEFATMVGGRGEIKKDVDFPEAGEDTALCDKENKPPRIAQGSSNVFINNQPAARKGDKLECSAAIVEGSPDVFIGGEQVTYLDIQPEFPPWQRMILGGITIASYLLPPAGLLGKLGNLAKLGKLGNLLGKSGKLLGAKLGALLSRTKNALKNTYNVLKKFIKDPVDPVT…
A0A400KFS5_ECOLX	Type IV secretion protein Rhs	EIF35_23985	Escherichia coli	1505	MSEGPGGPQGATAGGTLAMRMLSQQAMVASQMKRAANDKAIAQMLAAKKSGPPAARLGDEIQHKSFLGALAGAVLGAIVTIAEGCLIMAACATGPYALVLVPALMYASYKASDYVEEKQNQLESWINSFCDTDGAINTGSENVNINGKPAARAAVTLPPPPPPGAIPEVPQGEPSWGDIATDLLESAAEKAVPLAKAWGNAVITLTDSNAGFMDRLCAGTSLLFPAGPVLMEFATMVGGRGEIKKDVDFPEAGEDTALCDKENKPPRIAQGSSNVFINNQPAARKGDKLECSAAIVEGSPDVFIGGEQVTYLDIQPEFPPWQRMILGGITIASYLLPPAGLLGKLGNLAKLGKLGNLLGKSGKLLGAKLGALLSRTKNALKNTYNVLKKFIKDPVDPVT…
A0A3Z5DYD7_ECOLX	Type IV secretion protein Rhs	DP234_24270 EIP79_24825	Escherichia coli	1505	MSEGPGGPQGATAGGTLAMRMLSQQAMVASQMKRAANDKAIAQMLAAKKSGPPAARLGDEIQHKSFLGALAGAVLGAIVTIAEGCLIMAACATGPYALVLVPALMYASYKASDYVEEKQNQLESWINSFCDTDGAINTGSENVNINGKPAARAAVTLPPPPPPGAIPEVPQGEPSWGDIATDLLESAAEKAVPLAKAWGNAVITLTDSNAGFMDRLCAGTSLLFPAGPVLMEFATMVGGRGEIKKDVDFPEAGEDTALCDKENKPPRIAQGSSNVFINNQPAARKGDKLECSAAIVEGSPDVFIGGEQVTYLDIQPEFPPWQRMILGGITIASYLLPPAGLLGKLGNLARLGKLGNLLGKSGKLLGAKLGALLSRTKNALKNTYNVLKKFIKDPVDPVT…
A0A3K3G437_ECOLX	Type IV secretion protein Rhs	D9J44_25605	Escherichia coli	1505	MSEGPGGPQGATAGGTLAMRMLSQQAMVASQMKRAANDKAIAQMLAAKKSGPPAARLGDEIQHKSFLGALAGAVLGAIVTIAEGCLIMAACATGPYALVLVPALMYASYKASDYVEEKQNQLESWINSFCDTDGAINTGSENVNINGKPAARAAVTLPPPPPPGAIPEVPQGEPSWGDIATDLLESAAEKAVPLAKAWGNAVITLTDSNAGFMDRLCAGTSLLFPAGPVLMEFATMVGGRGEIKKDVDFPEAGEDTALCDKENKPPRIAQGSSNVFINNQPAARKGDKLECSAAIVEGSPDVFIGGEQVTYLDIQPEFPPWQRMILGGITIASYLLPPAGLLGKLGNLAKLGKLGNLLGKSGKLLGAKLGALLSRTKNALKNTYNVLKKFIKDPVDPVT…
A0A4C9MHU3_ECOLX	Type IV secretion protein Rhs	C9098_12870	Escherichia coli	1505	MSEGPGGPQGATAGGTLAMRMLSQQAMVASQMKRAANDKAIAQMLAAKKSGPPAARLGDEIQHKSFLGALAGAVLGAIVTIAEGCLIMAACATGPYALVLVPALMYASYKASDYVEEKQNQLESWINSFCDTDGAINTGSENVNINGKPAARAAVTLPPPPPPGAIPEVPQGEPSWGDIATDLLESAAEKAVPLAKAWGNAVITLTDSNAGFMDRLCAGTSLLFPAGPVLMEFATMVGGRGEIKKDVDFPEAGEDTALCDKENKPPRIAQGSSNVFINNQPAARKGDKLECSAAIVEGSPDVFIGGEQVTYLDIQPEFPPWQRMILGGITIASYLLPPAGLLGKLGNLAKLGKLGNLLGKSGKLLGAKLGALLSRTKNALKNTYNVLKKFIKDPVDPVT…
A0A3W5EZ33_ECOLX	Type IV secretion protein Rhs (Fragment)	D7K46_24700	Escherichia coli	1589	MSEGPGGPQGATAGGTLAMRMLSQRAMAASQMKRAANDKAIAQMLASKKSGPPAARLGDEIQHKSFLGALAGAVLGAIVTIAEGCLIMAACATGPYALVLVPALMYASYKASDYVEEKQNQLESWINSFCDTDGAINTGSKNVKINGKPAARAAVTLPPPPPPGAIPEVPQGEPSWGDIATDLLESAAEKAVPLAKAWGNAVITLTDSNAGFMDRVSAGASLLFPAGPVLMEFATMVGGRGEIKKDVDFPEAGEDTALCDKENKPPRIAQGSSNVFINNQPAARKGDKLECSAAIVEGSPDVFIGGEQVTYLDIQPEFPPWQRMILGGITIASYLLPPAGLLGKLGNLAKLGKLGNLLGKSGKLLGAKLGALLGKTGNSLKSIANKVIRWVTDPVDPVT…
A0A3T3J4C8_ECOLX	Type IV secretion protein Rhs	DLT90_23830	Escherichia coli	1611	MSEGPGGPQGATAGGTLAMRMLSQRAMAASQMKRAANDKAIAQMLASKKSGPPAARLGDEIQHKSFLGALAGAVLGAIVTIAEGCLIMAACATGPYALVLVPALMYASYKASDYVEEKQNQLESWINSFCDTDGAINTGSKNVKINGKPAARAAVTLPPPPPPGAIPEVPQGEPSWGDIATDLLESAAEKAVPLAKAWGNAVITLTDSNAGFMDRVSAGASLLFPAGPVLMEFATMVGGRGEIKKDVDFPEAGEDTALCDKENKPPRIAQGSSNVFINNQPAARKGDKLECSAAIVEGSPDVFIGGEQVTYLDIQPEFPPWQRMILGGITIASYLLPPAGLLGKLGNLAKLGKLGNLLGKSGKLLGAKLGALLGKTGNSLKSIANKVIRWVTDPVDPVT…
A0A3Y2G9E9_ECOLX	Type IV secretion protein Rhs	EHE06_25025	Escherichia coli	1505	MSEGPGGPQGATAGGTLAMRMLSQQAMVASQMKRAANDKAIAQMLASKKSGPPAARLGDEIQHKSFLGALAGAVLGAIVTIAEGCLIMAACATGPYALVLVPALMYASYKASDYVEEKQNQLESWINSFCDTDGAINTGSENVNINGKPAARAAVTLPPPPPPGAIPEVPQGEPSWGDIATDLLESAAEKAVPLAKAWGNAVITLTDSNAGFMDRLCAGTSLLFPAGPVLMEFATMVGGRGEIKKDVDFPEAGEDTALCDKENKPPRIAQGSSNVFINNQPAARKGDKLECSAAIVEGSPDVFIGGEQVTYLDIQPEFPPWQRMILGGITIASYLLPPAGLLGKLGNLAKLGKLGNLLGKSGKLLGAKLGALLSRTKNALKNTYNVLKKFIKDPVDPVT…
A0A3W3JJB8_ECOLX	Type IV secretion protein Rhs (Fragment)	D6W35_10705	Escherichia coli	1591	MSEGPGGPQGATAGGTLAMRMLSQRAMAASQMKRAANDKAIAQMLASKKSGPPAARLGDEIQHKSFLGALAGAVLGAIVTIAEGCLIMAACATGPYALVLVPALMYASYKASDYVEEKQNQLESWINSFCDTDGAINTGSKNVKINGKPAARAAVTLPPPPPPGAIPEVPQGEPSWGDIATDLLESAAEKAVPLAKAWGNAVITLTDSNAGFMDRVSAGASLLFPAGPVLMEFATMVGGRGEIKKDVDFPEAGEDTALCDKENKPPRIAQGSSNVFINNQPAARKGDKLECSAAIVEGSPDVFIGGEQVTYLDIQPEFPPWQRMILGGITIASYLLPPAGLLGKLGNLAKLGKLGNLLGKSGKLLGAKLGALLGKTGNSLKSIANKVIRWVTDPVDPVT…
A0A3Z8FYV3_ECOLX	Type IV secretion protein Rhs	EHV65_07615 EHV89_03760	Escherichia coli	1611	MSEGPGGPQGATAGGTLAMRMLSQRAMAASQMKRAANDKAIAQMLASKKSGPPAARLGDEIQHKSFLGALAGAVLGAIVTIAEGCLIMAACATGPYALVLVPALMYASYKASDYVEEKQNQLESWINSFCDTDGAINTGSKNVKINGKPAARAAVTLPPPPPPGAIPEVPQGEPSWGDIATDLLESAAEKAVPLAKAWGNAVITLTDSNAGFMDRVSAGASLLFPAGPVLMEFATMVGGRGEIKKDVDFPEAGEDTALCDKENKPPRIAQGSSNVFINNQPAARKGDKLECSAAIVEGSPDVFIGGEQVTYLDIQPEFPPWQRMILGGITIASYLLPPAGLLGKLGNLAKLGKLGNLLGKSGKLLGAKLGALLGKTGNSLKSIANKVIRWVTDPVDPVT…
A0A2Y0NL26_ECOLX	Rhs core protein	wapA_1 SAMEA3485101_01152	Escherichia coli	1601	MSEGPGGPQGATAGGTLAMRMLSQQAMVASQMKRAANNKAIAQMLASKKSGPPAARLGDEIQHKSFLGALAGAVLGAIVTIAEGCLIMAACATGPYALVLVPALMYASYKASDYVEEKQNQLESWINSFCDTDGAINTGSENVKINGKPAARAAVTLPSPPPPEAIPEASQGEHSWGDMALDLLESAAEKAAPLAKSWGNAVITLTDSNASFMDRVSAGASLLFPAGPVLMEFATMVGGRGEIKKDVDFPEAGEDTALCDKENKPPRIAQGSSNVFINNQPAARKGDKLECSAAIVEGSPDVFIGGEQVTYLDIQPEFPPWQRMILGGITIASYLLPPAGLLGKLGNLAKLGKLGNLLGKSGKLLGAKLGALLGKTGKSLKSIANKVIRWVTDPVDPVT…
A0A4Q6H9Y6_ECOLX	Type IV secretion protein Rhs	EVY14_24585	Escherichia coli	1609	MSEGPGGPQGATAGGTLAMRMLSQQAMVASQMKRAANDKAIAQMLASKKSGPPAARLGDEIQHKSFLGALAGAVLGAIVTIAEGCLIMAACATGPYALVLVPALMYASYKASDYVEEKQNQLESWINSFCDTDGAINTGSENVNINGKPAARAAVTLPPPPPPGAIPEIPQGEPSWGDIATDLLESAAEKAVPLAKAWGNAVITLTDSNAGFMDRVSAGASLLFPAGPVLMEFATMVGGRGEIKKDVDFPEAGEDTALCDKENKPPRIAQGSSNVFINNQPAARKGDKLECSAAIVEGSPDVFIGGEQVTYLDIQPEFPPWQRMILGGITIASYLLPPAGLLGKLKNLARLGKLGNLLGKSGKLLGAKLGALLGKTGKSLKSIANKVIRWVTDPVDPVT…
U9Y648_ECOLX	RHS repeat-associated core domain protein (Fragment)	HMPREF1589_02476	Escherichia coli 113290	1595	MSEGPGGPQGATAGGTLAMRMLSQQAMVASQMKRAANNKAIAQMLASKKSGPPAARLGDEIQHKSFLGALAGAVLGAIVTIAEGCLIMAACATGPYALVLVPALMYASYKASDYVEEKQNQLESWINSFCDTDGAINTGSENVKINGKPAARAAVTLPSPPPPEAIPEASQGEHSWGDMALDLLESAAEKAAPLAKSWGNAVITLTDSNASFMDRVSAGASLLFPAGPVLMEFATMVGGRGEIKKDVDFPEAGEDTALCDKENKPPRIAQGSSNVFINNQPAARKGDKLECSAAIVEGSPDVFIGGEQVTYLDIQPEFPPWQRMILGGITIASYLLPPAGLLGKLGNLAKLGKLGNLLGKSGKLLGAKLGALLGKTGKSLKSIANKVIRWVTDPVDPVT…
A0A2X5PU26_ECOLX	Rhs core protein with extension	wapA_1 SAMEA3472056_03803	Escherichia coli	1606	MSEGPGGPQGATAGGTLAMRMLSQQAMVASQMKRAANNKAIAQMLASKKSGPPAARLGDEIQHKSFLGALAGAVLGAIVTIAEGCLIMAACATGPYALVLVPALMYASYKASDYVEEKQNQLESWINSFCDTDGAINTGSENVKINGKPAARAAVTLPSPPPPEAIPEASQGEHSWGDMALDLLESAAEKAAPLAKSWGNAVITLTDSNASFMDRVSAGASLLFPAGPVLMEFATMVGGRGEIKKDVDFPEAGEDTALCDKENKPPRIAQGSSNVFINNQPAARKGDKLECSAAIVEGSPDVFIGGEQVTYLDIQPEFPPWQRMILGGITIASYLLPPAGLLGKLGNLAKLGKLGNLLGKSGKLLGAKLGALLGKTGKSLKSIANKVIRWVTDPVDPVT…
A0A377NVQ6_ECOLX	Rhs core protein with extension	wapA_3 NCTC9119_03752	Escherichia coli	1606	MSEGPGGPQGATAGGTLAMRMLSQQAMVASQMKRAANNKAIAQMLASKKSGPPAARLGDEIQHKSFLGALAGAVLGAIVTIAEGCLIMAACATGPYALVLVPALMYASYKASDYVEEKQNQLESWINSFCDTDGAINTGSENVKINGKPAARAAVTLPSPPPPEAIPEASQGEHSWGDMALDLLESAAEKAAPLAKSWGNAVITLTDSNASFMDRVSAGASLLFPAGPVLMEFATMVGGRGEIKKDVDFPEAGEDTALCDKENKPPRIAQGSSNVFINNQPAARKGDKLECSAAIVEGSPDVFIGGEQVTYLDIQPEFPPWQRMILGGITIASYLLPPAGLLGKLGNLAKLGKLGNLLGKSGKLLGAKLGALLGKTGKSLKSIANKVIRWVTDPVDPVT…
A0A3P1I1Q7_ECOLX	Type IV secretion protein Rhs	EIA21_25505	Escherichia coli	1606	MSEGPGGPQGATAGGTLAMRMLSQQAMVASQMKRAANNKAIAQMLASKKSGPPAARLGDEIQHKSFLGALAGAVLGAIVTIAEGCLIMAACATGPYALVLVPALMYASYKASDYVEEKQNQLESWINSFCDTDGAINTGSENVKINGKPAARAAVTLPSPPPPEAIPEASQGEHSWGDMALDLLESAAEKAAPLAKSWGNAVITLTDSNASFMDRVSAGASLLFPAGPVLMEFATMVGGRGEIKKDVDFPEAGEDTALCDKENKPPRIAQGSSNVFINNQPAARKGDKLECSAAIVEGSPDVFIGGEQVTYLDIQPEFPPWQRMILGGITIASYLLPPAGLLGKLGNLAKLGKLGNLLGKSGKLLGAKLGALLGKTGKSLKSIANKVIRWVTDPVDPVT…
A0A403D126_ECOLX	Type IV secretion protein Rhs	DNX30_15465	Escherichia coli	1617	MSEGPGGPQGATAGGTLAMRMLSQQAMVASQMKRAANDKAIAQMLASKKSGPPAARLGDEIQHKSFLGALAGAVLGAIVTIAEGCLIMAACATGPYALVLVPALMYASYKASDYVEEKQNQLESWINSFCDTDGAINTGSKNVNINGKPAARAAVTLPPPPLTEAIPSPPQGEPSWGDIATDLLESAAEKAVPLAKAWGNAVITLTDSNAGIMDRVSAGASLLFPAGPVLMEFATMVGGRGEIKKDVDFPEAGEDTALCDKENKPPRIAQGSSNVFINNQPAARKGDKLECSAAIVEGSPDVFIGGEQVTYLDIQPEFPPWQRMILGGITIASYLLPPAGLLGKLGNLAKLGKLGNLLGKSGKLLGAKLGALLGKTGKSLKSIANKVIRWVTDPVDPVT…
A0A0A1A2L6_ECOLX	Putative deoxyribonuclease RhsA (Type IV secretion protein Rhs)	rhsA_1 BK334_18540 C6B13_12185 D9G11_16820 DB359_03655 E2148_02670 ECONIH1_03280 EIA08_00015 EYY27_09595 MS6198_06160	Escherichia coli	1617	MSEGPGGPQGATAGGTLAMRMLSQQAMVASQMKRAANDKAIAQMLASKKSGPPAARLGDEIQHKSFLGALAGAVLGAIVTIAEGCLIMAACATGPYALVLVPALMYASYKASDYVEEKQNQLESWINSFCDTDGAINTGSKNVNINGKPAARAAVTLPPPPLTEAIPSPPQGEPSWGDIATDLLESAAEKAVPLAKAWGNAVITLTDSNAGIMDRVSAGASLLFPAGPVLMEFATMVGGRGEIKKDVDFPEAGEDTALCDKENKPPRIAQGSSNVFINNQPAARKGDKLECSAAIVEGSPDVFIGGEQVTYLDIQPEFPPWQRMILGGITIASYLLPPAGLLGKLGNLAKLGKLGNLLGKSGKLLGAKLGALLGKTGKSLKSIANKVIRWVTDPVDPVT…
A0A171D3M3_KLEOX	RhsD protein	wapA_2 SAMEA2273741_04187	Klebsiella oxytoca	1617	MSEGPGGPQGATAGGTLAMRMLSQQAMVASQMKRAANDKAIAQMLASKKSGPPAARLGDEIQHKSFLGALAGAVLGAIVTIAEGCLIMAACATGPYALVLVPALMYASYKASDYVEEKQNQLESWINSFCDTDGAINTGSKNVNINGKPAARAAVTLPPPPLTEAIPSPPQGEPSWGDIATDLLESAAEKAVPLAKAWGNAVITLTDSNAGIMDRVSAGASLLFPAGPVLMEFATMVGGRGEIKKDVDFPEAGEDTALCDKENKPPRIAQGSSNVFINNQPAARKGDKLECSAAIVEGSPDVFIGGEQVTYLDIQPEFPPWQRMILGGITIASYLLPPAGLLGKLGNLAKLGKLGNLLGKSGKLLGAKLGALLGKTGKSLKSIANKVIRWVTDPVDPVT…
A0A2G4ALB8_ECOLX	Type IV secretion protein Rhs	CSB64_09910	Escherichia coli	1617	MSEGPGGPQGATAGGTLAMRMLSQQAMVASQMKRAANDKAIAQMLASKKSGPPAARLGDEIQHKSFLGALAGAVLGAIVTIAEGCLIMAACATGPYALVLVPALMYASYKASDYVEEKQNQLESWINSFCDTDGAINTGSKNVNINGKPAARAAVTLPPPPLTEAIPSPPQGEPSWGDIATDLLESAAEKAVPLAKAWGNAVITLTDSNAGIMDRVSAGASLLFPAGPVLMEFATMVGGRGEIKKDVDFPEAGEDTALCDKENKPPRIAQGSSNVFINNQPAARKGDKLECSAAIVEGSPDVFIGGEQVTYLDIQPEFPPWQRMILGGITIASYLLPPAGLLGKLGNLAKLGKLGNLLGKSGKLLGAKLGALLGKTGKSLKSIANKVIRWVTDPVDPVT…
A0A3Y3ABD7_ECOLX	Type IV secretion protein Rhs	D4033_25225	Escherichia coli	1620	MSEGPGGPQGATAGGTLAMRMLSQQAMVASQMKRAANDKAIAQMLAAKKSGPPAARLGDEIQHKSFLGALAGAVLGAIVTIAEGCLIMAACATGPYALVLVPALMYASYKASDYVEEKQNQLESWINSFCDTDGAINTGSENVNINGKPAARAAVTLPPPPPPGAIPEVPQGEPSWGDIATDLLESAAEKAVPLAKAWGNAVITLTDSNAGFMDRVSAGASLLFPAGPVLMEFATMVGGRGEIKKEVDFPEAGEDSALCDKENKPPRIAQGSSNVFINNQPAARKGDKLECSAAIVEGSPDVFIGGEQVTYLDIQPEFPPWQRMILGGITIASYLLPPAGLLGKLKNLARLGKLGNLLGKSGKLLGAKLGALLGKTGKSLKSIANKVIRWVTDPVDPVT…
A0A3U5UY22_ECOLX	Type IV secretion protein Rhs	DQF36_25230 EIJ93_21620	Escherichia coli	1620	MSEGPGGPQGATAGGTLAMRMLSQQAMVASQMKRAANDKAIAQMLAAKKSGPPAARLGDEIQHKSFLGALAGAVLGAIVTIAEGCLIMAACATGPYALVLVPALMYASYKASDYVEEKQNQLESWINSFCDTDGAINTGSENVNINGKPAARAAVTLPPPPPPGAIPEVPQGEPSWGDIATDLLESAAEKAVPLAKAWGNAVITLTDSNAGFMDRVSAGASLLFPAGPVLMEFATMVGGRGEIKKEVDFPEAGEDSALCDKENKPPRIAQGSSNVFINNQPAARKGDKLECSAAIVEGSPDVFIGGEQVTYLDIQPEFPPWQRMILGGITIASYLLPPAGLLGKLKNLARLGKLGNLLGKSGKLLGAKLGALLGKTGKSLKSIANKVIRWVTDPVDPVT…
A0A3T4TGF2_ECOLX	Type IV secretion protein Rhs	DL257_24960	Escherichia coli	1613	MSEGPGGPQGATAGGTLAMRMLSQQAMVASQMKRAANDKAIAQMLASKKSGPPAARLGDEIQHKSFLGALAGAVLGAIVTIAEGCLIMAACATGPYALVLVPALMYASYKASDYVEEKQNQLESWINSFCDTDGAINTGSENVNINGKPAARAAVTLPPPPPPGAIPEIPQGEPSWGDIATDLLESAAEKAVPLAKAWGNAVITLTDSNAGFMDRVSAGASLLFPAGPVLMEFATMVGGRGEIKKDVDFPEAGEDTALCDKENKPPRIAQGSSNVFINNQPAARKGDKLECSAAIVEGSPDVFIGGEQVTYLDIQPEFPPWQRMILGGITIASYLLPPAGLLGKLKNLARLGKLGNLLGKSGKLLGAKLGALLGKTGKSLKSIANKVIRWVTDPVDPVT…
A0A3Z5ICX7_ECOLX	Type IV secretion protein Rhs	D4L89_11185	Escherichia coli	1620	MSEGPGGPQGATAGGTLAMRMLSQQAMVASQMKRAANDKAIAQMLAAKKSGPPAARLGDEIQHKSFLGALAGAVLGAIVTIAEGCLIMAACATGPYALVLVPALMYASYKASDYVEEKQNQLESWINSFCDTDGAINTGSENVNINGKPAARAAVTLPPPPPPGAIPEVPQGEPSWGDIATDLLESAAEKAVPLAKAWGNAVITLTDSNAGFMDRVSAGASLLFPAGPVLMEFATMVGGRGEIKKEVDFPEAGEDSALCDMENKPPRIAQGSSNVFINNQPAARKGDKLECSAAIVEGSPDVFIGGEQVTYLDIQPEFPPWQRMILGGITIASYLLPPAGLLGKLKNLARLGKLGNLLGKSGKLLGAKLGALLGKTGKSLKSIANKVIRWVTDPVDPVT…
A0A3W4F709_ECOLX	Type IV secretion protein Rhs (Fragment)	EIK45_09530	Escherichia coli	1612	MSEGPGGPQGATAGGTLAMRMLSQRAMAASQMKRAANDKAIAQMLASKKSGPPAARLGDEIQHKSFLGALAGAVLGAIVTIAEGCLIMAACATGPYALVLVPALMYASYKASDYVEEKQNQLESWINSFCDTDGAINTGSKNVKINGKPAARAAVTLPPPPPPGAIPEVPQGEPSWGDIATDLLESAAEKAVPLAKAWGNAVITLTDSNAGFMDRVSAGASLLFPAGPVLMEFATMVGGRGEIKKDVDFPEAGEDTALCDKENKPPRIAQGSSNVFINNQPAARKGDKLECSAAIVEGSPDVFIGGEQVTYLDIQPEFPPWQRMILGGITIASYLLPPAGLLGKLGNLAKLGKLGNLLGKSGKLLGAKLGALLGKTGNSLKSIANKVIRWVTDPVDPVT…
A0A376STP8_ECOLX	RHS Repeat family protein	wapA_3 NCTC13127_04958	Escherichia coli	1616	MSEGLGGPQGATAGGTLAMRMLSQRAMAASQMKRAANDKAIAQMLASKKSGPPAARLGDEIQHKSFLGALAGAVLGAIVTIAEGCLIMAACATGPYALVLVPALMYASYKASDYVEEKQNQLESWINSFCDTDGAINTGSKNVKINGKPAARAAVTLPPPPPPGAIPEVPQGEPSWGDIATDLLESAAEKAVPLAKAWGNAVITLTDSNAGFMDRVSAGASLLFPAGPVLMEFATMVGGRGEIKKDVDFPEAGEDTALCDKENKPPRIAQGSSNVFINNQPAARKGDKLECSAAIVEGSPDVFIGGEQVTYLDIQPEFPPWQRMILGGITIASYLLPPAGLLGKLGNLAKLGKLGNLLGKSGKLLGAKLGALLGKTGNSLKSIANKVIRWVTDPVDPVT…
A0A3U1CUV7_ECOLX	Type IV secretion protein Rhs	DOD99_08130	Escherichia coli	1620	MSEGPGGPQGATAGGTLAMRMLSQQAMVASQMKRAANDKAIAQMLAAKKSGPPAARLGDEIQHKSFLGALAGAVLGAIVTIAEGCLIMAACATGPYALVLVPALMYASYKASDYVEEKQNQLESWINSFCDTDGAINTGSENVNINGKPAARAAVTLPPPPPPGAIPEVPQGEPSWGDIATDLLESAAEKAVPLAKAWGNAVITLTDSNAGFMDRVSAGASLLFPAGPVLMEFATMVGGRGEIKKEVDFPEAGEDSALCDKENKPPRIAQGSSNVFINNQPAARKGDKLECSAAIVEGSPDVFIGGEQVTYLDIQPEFPPWQRMILGGITIASYLLPPAGLLGKLKNLARLGKLGNLLGKSGKLLGAKLGALLGKTGKSLKSIANKVIRWVTDPVDPVT…
A0A0K4A1V8_ECOLX	RHS Repeat family protein (Type IV secretion protein Rhs)	wapA_2 wapA_3 A6581_11030 ERS085383_02754 EXM29_01625 NCTC9701_03900	Escherichia coli	1616	MSEGPGGPQGATAGGTLAMRMLSQRAMAASQMKRAANDKAIAQMLASKKSGPPAARLGDEIQHKSFLGALAGAVLGAIVTIAEGCLIMAACATGPYALVLVPALMYASYKASDYVEEKQNQLESWINSFCDTDGAINTGSKNVKINGKPAARAAVTLPPPPPPGAIPEVPQGEPSWGDIATDLLESAAEKAVPLAKAWGNAVITLTDSNAGFMDRVSAGASLLFPAGPVLMEFATMVGGRGEIKKDVDFPEAGEDTALCDKENKPPRIAQGSSNVFINNQPAARKGDKLECSAAIVEGSPDVFIGGEQVTYLDIQPEFPPWQRMILGGITIASYLLPPAGLLGKLGNLAKLGKLGNLLGKSGKLLGAKLGALLGKTGNSLKSIANKVIRWVTDPVDPVT…
D3QLK9_ECOCB	Rhs core protein with extension	rhsI G2583_0728	Escherichia coli O55:H7 (strain CB9615 / EPEC)	1616	MSEGPGGPQGATAGGTLAMRMLSQRAMAASQMKRAANDKAIAQMLASKKSGPPAARLGDEIQHKSFLGALAGAVLGAIVTIAEGCLIMAACATGPYALVLVPALMYASYKASDYVEEKQNQLESWINSFCDTDGAINTGSKNVKINGKPAARAAVTLPPPPPPGAIPEVPQGEPSWGDIATDLLESAAEKAVPLAKAWGNAVITLTDSNAGFMDRVSAGASLLFPAGPVLMEFATMVGGRGEIKKDVDFPEAGEDTALCDKENKPPRIAQGSSNVFINNQPAARKGDKLECSAAIVEGSPDVFIGGEQVTYLDIQPEFPPWQRMILGGITIASYLLPPAGLLGKLGNLAKLGKLGNLLGKSGKLLGAKLGALLGKTGNSLKSIANKVIRWVTDPVDPVT…
A0A3W5S1E6_ECOLX	Type IV secretion protein Rhs	D5H12_11980 D9S48_11110 DM171_25525 EAN13_09550	Escherichia coli	1616	MSEGPGGPQGATAGGTLAMRMLSQRAMAASQMKRAANDKAIAQMLASKKSGPPAARLGDEIQHKSFLGALAGAVLGAIVTIAEGCLIMAACATGPYALVLVPALMYASYKASDYVEEKQNQLESWINSSCDTDGAINTGSKNVKINGKPAARAAVTLPPPPPPGAIPEVPQGEPSWGDIATDLLESAAEKAVPLAKAWGNAVITLTDSNAGFMDRVSAGASLLFPAGPVLMEFATMVGGRGEIKKDVDFPEAGEDTALCDKENKPPRIAQGSSNVFINNQPAARKGDKLECSAAIVEGSPDVFIGGEQVTYLDIQPEFPPWQRMILGGITIASYLLPPAGLLGKLGNLAKLGKLGNLLGKSGKLLGAKLGALLGKTGNSLKSIANKVIRWVTDPVDPVT…
A0A0K3PND3_ECOLX	RHS Repeat family protein	wapA_2 ERS085404_03696	Escherichia coli	1616	MSEGPGGPQGATAGGTLAMRMLSQRAMAASQMKRAANDKAIAQMLASKKSGPPAARLGDEIQHKSFLGALAGAVLGAIVTIAEGCLIMAACATGPYALVLVPALMYASYKASDYVEEKQNQLESWINSFCDTDGAINTGSKNVKINGKPAARAAVTLPPPPPPGAIPEVPQGEPSWGDIATDLLESAAEKAVPLAKAWGNAVITLTDSNAGFMDRVSAGASLLFPAGPVLMEFATMVGGRGEIKKDVDFPEAGEDTALCDKENKPPRIAQGSSNVFINNQPAARKGDKLECSAAIVEGSPDVFIGGEQVTYLDIQPEFPPWQRMILGGITIASYLLPPAGLLGKLGNLAKLGKLGNLLGKSGKLLGAKLGALLGKTGNSLKSIANKVIRWVTDPVDPVT…
A0A3T9UZK0_ECOLX	Type IV secretion protein Rhs	D4614_13600 D4637_15975 D5F75_25415 DNX12_14720 DRP31_24570 DV843_14490	Escherichia coli	1616	MSEGPGGPQGATAGGTLAMRMLSQRAMAASQMKRAANDKAIAQMLASKKSGPPAARLGDEIQHKSFLGALAGAVLGAIVTIAEGCLIMAACATGPYALVLVPALMYASYKASDYVEEKQNQLESWINSFCDTDGAINTGSKNVKINGKPAARAAVTLPPPPPPGAIPEVPQGEPSWGDIATDLLESAAEKAVPLAKAWGNAVITLTDSNAGFMDRVSAGASLLFPAGPVLMEFATMVGGRGEIKKDVDFPEAGEDTALCDKENKPPRIAQGSSNVFINNQPAARKGDKLECSAAIVEGSPDVFIGGEQVTYLDIQPEFPPWQRMILGGITIASYLLPPAGLLGKLGNLAKLGKLGNLLGKSGKLLGAKLGALLGKTGNSLKSIANKVIRWVTDPVDPVT…
A0A3Y3M766_ECOLX	Type IV secretion protein Rhs	D4011_11570 D5I48_25945 D6X63_26555 DL727_13220 DLY46_25265 DMO02_13165 DMY25_14080 DN806_25820 DNX16_15845 DOY22_13145 DRV98_25275 DTY84_24225 EGT11_14815	Escherichia coli	1616	MSEGPGGPQGATAGGTLAMRMLSQRAMAASQMKRAANDKAIAQMLASKKSGPPAARLGDEIQHKSFLGALAGAVLGAIVTIAEGCLIMAACATGPYALVLVPALMYASYKASDYVEEKQNQLESWINSFCDTDGAINTGSKNVKINGKPAARAAVTLPPPPPPGAIPEVPQGEPSWGDIATDLLESAAEKAVPLAKAWGNAVITLTDSNAGFMDRVSAGASLLFPAGPVLMEFATMVGGRGEIKKDVDFPEAGEDTALCDKENKPPRIAQGSSNVFINNQPAARKGDKLECSAAIVEGSPDVFIGGEQVTYLDIQPEFPPWQRMILGGITIASYLLPPAGLLGKLGNLAKLGKLGNLLGKSGKLLGAKLGALLGKTGNSLKSIANKVIRWVTDPVDPVT…
A0A3Y7D1L3_ECOLX	Type IV secretion protein Rhs	D4L91_21025	Escherichia coli	1616	MSEGPGGPQGATAGGTLAMRMLSQRAMAASQMNRAANDKAIAQMLASKKSGPPAARLGDEIQHKSFLGALAGAVLGAIVTIAEGCLIMAACATGPYALVLVPALMYASYKASDYVEEKQNQLESWINSFCDTDGAINTGSKNVKINGKPAARAAVTLPPPPPPGAIPEVPQGEPSWGDIATDLLESAAEKAVPLAKAWGNAVITLTDSNAGFMDRVSAGASLLFPAGPVLMEFATMVGGRGEIKKDVDFPEAGEDTALCDKENKPPRIAQGSSNVFINNQPAARKGDKLECSAAIVEGSPDVFIGGEQVTYLDIQPEFPPWQRMILGGITIASYLLPPAGLLGKLGNLAKLGKLGNLLGKSGKLLGAKLGALLGKTGNSLKSIANKVIRWVTDPVDPVT…
A0A3Z0T8K6_ECOLX	Type IV secretion protein Rhs	EHX09_17580	Escherichia coli	1616	MSEGPGGPQGATAGGTLAMRMLSQRAMAASQMKRAANDKAIAQMLASKKSGPPAARLGDEIQHKSFLGALAGAVLGAIVTIAEGCLIMAACATGPYALVLVPALMYASYKASDYVEEKQNQLESWINSFCDTDGAINTGSKNVKINGKPAARAAVTLPPPPPPGAIPEVPQGEPSWGDIATDLLESAAEKAVPLAKAWGNAVITLTDSNAGFMDRVSAGASLLFPAGPVLMEFATMVGGRGEIKKDVDFPEAGEDTALCDKENKPPRIAQGSSNVFINNQPAARKGDKLECSAAIVEGSPDVFIGGEQVTYLDIQPEFPPWQRMILGGITIASYLLPPAGLLGKLGNLAKLGKLGNLLGKSGKLLGAKLGALLGKTGNSLKSIANKVIRWVTDPVDPVT…
A0A3W5T9N2_ECOLX	Type IV secretion protein Rhs (Fragment)	EGI01_06070	Escherichia coli	1615	MSEGPGGPQGATAGGTLAMRMLSQRAMAASQMKRAANDKAIAQMLASKKSGPPAARLGDEIQHKSFLGALAGAVLGAIVTIAEGCLIMAACATGPYALVLVPALMYASYKASDYVEEKQNQLESWINSFCDTDGAINTGSKNVKINGKPAARAAVTLPPPPPPGAIPEVPQGEPSWGDIATDLLESAAEKAVPLAKAWGNAVITLTDSNAGFMDRVSAGASLLFPAGPVLMEFATMVGGRGEIKKDVDFPEAGEDTALCDKENKPPRIAQGSSNVFINNQPAARKGDKLECSAAIVEGSPDVFIGGEQVTYLDIQPEFPPWQRMILGGITIASYLLPPAGLLGKLGNLAKLGKLGNLLGKSGKLLGAKLGALLGKTGNSLKSIANKVIRWVTDPVDPVT…
A0A3Z7WVH6_ECOLX	Type IV secretion protein Rhs	D4623_15035 D4M06_26605 D4U67_14910 D6C36_15590 D6D32_08115 D6T95_24630 D7017_14745 DLV46_14800 DLY80_14275 DNB37_11490 DNJ62_25650 DNK33_14430 DOX85_25165 DOY56_14845 DP290_14690 DP339_24010 DQF60_15415 DQG39_14130 DQQ24_08145 DS725_15705 DU436_25225 EHV74_11710 EHW05_22635	Escherichia coli	1616	MSEGPGGPQGATAGGTLAMRMLSQRAMAASQMKRAANDKAIAQMLASKKSGPPAARLGDEIQHKSFLGALAGAVLGAIVTIAEGCLIMAACATGPYALVLVPALMYASYKASDYVEEKQNQLESWINSFCDTDGAINTGSKNVKINGKPAARAAVTLPPPPPPGAIPEVPQGEPSWGDIATDLLESAAEKAVPLAKAWGNAVITLTDSNAGFMDRVSAGASLLFPAGPVLMEFATMVGGRGEIKKDVDFPEAGEDTALCDKENKPPRIAQGSSNVFINNQPAARKGDKLECSAAIVEGSPDVFIGGEQVTYLDIQPEFPPWQRMILGGITIASYLLPPAGLLGKLGNLAKLGKLGNLLGKSGKLLGAKLGALLGKTGNSLKSIANKVIRWVTDPVDPVT…
A0A3I1PJH5_ECOLX	Type IV secretion protein Rhs	ED611_12145	Escherichia coli	1616	MSEGPGGPQGATAGGTLAMRMLSQRAMAASQMKRAANDKAIAQMLASKKSGPPAARLGDEIQHKSFLGALAGAVLGAIVTIAEGCLIMAACATGPYALVLVPALMYASYKASDYVEEKQNQLESWINSFCDTDGAINTGSKNVKINGKPAARAAVTLPPPPPPGAIPEVPQGEPSWGDIATDLLESAAEKAVPLAKAWGNAVITLTDSNAGFMDRVSAGASLLFPAGPVLMEFATMVGGRGEIKKDVDFPEAGEDTALCDKENKPPRIAQGSSNVFINNQPAARKGDKLECSAAIVEGSPDVFIGGEQVTYLDIQPEFPPWQRMILGGITIASYLLPPAGLLGKLGNLAKLGKLGNLLGKSGKLLGAKLGALLGKTGNSLKSIANKVIRWVTDPVDPVT…
A0A3I0R714_ECOLX	Type IV secretion protein Rhs	ED225_11890	Escherichia coli	1616	MSEGPGGPQGATAGGTLAMRMLSQRAMAASQMKRAANDKAIAQMLASKKSGPPAARLGDEIQHKSFLGALAGAVLGAIVTIAEGCLIMAACATGPYALVLVPALMYASYKASDYVEEKQNQLESWINSFCDTDGAINTGSKNVKINGKPAARAAVTLPPPPPPGAIPEVPQGEPSWGDIATDLLESAAEKAVPLAKAWGNAVITLTDSNAGFMDRVSAGASLLFPAGPVLMEFATMVGGRGEIKKDVDFPEAGEDTALCDKENKPPRIAQGSSNVFINNQPAARKGDKLECSAAIVEGSPDVFIGGEQVTYLDIQPEFPPWQRMILGGITIASYLLPPAGLLGKLGNLAKLGKLGNLLGKSGKLLGAKLGALLGKTGNSLKSIANKVIRWVTDPVDPVT…
A0A143E5Q7_ECOLX	Type IV secretion protein Rhs	ARC77_22430 CRE06_25900 D7K66_07965 D9L89_08970 D9X97_10825 EB509_14160 EB515_11550 ED903_24255 ED944_15965 EEA45_17235	Escherichia coli	1616	MSEGPGGPQGATAGGTLAMRMLSQRAMAASQMKRAANDKAIAQMLASKKSGPPAARLGDEIQHKSFLGALAGAVLGAIVTIAEGCLIMAACATGPYALVLVPALMYASYKASDYVEEKQNQLESWINSFCDTDGAINTGSKNVKINGKPAARAAVTLPPPPPPGAIPEVPQGEPSWGDIATDLLESAAEKAVPLAKAWGNAVITLTDSNAGFMDRVSAGASLLFPAGPVLMEFATMVGGRGEIKKDVDFPEAGEDTALCDKENKPPRIAQGSSNVFINNQPAARKGDKLECSAAIVEGSPDVFIGGEQVTYLDIQPEFPPWQRMILGGITIASYLLPPAGLLGKLGNLAKLGKLGNLLGKSGKLLGAKLGALLGKTGNSLKSIANKVIRWVTDPVDPVT…
A0A3W4QQG4_ECOLX	Type IV secretion protein Rhs	D6W76_15330	Escherichia coli	1616	MSEGPGGPQGATAGGTLAMRMLSQRAMAASQMKRAANDKAIAQMLASKKSGPPAARLGDEIQHKSFLGALAGAVLGAIVTIAEGCLIMAACATGPYALVLVPALMYASYKASDYVEEKQNQLESWINSFCDTDGAINTGSKNVKINGKPAARAAVTLPPPPPPGAIPEVPQGEPSWGDIATDLLESAAEKAVPLAKAWGNAVITLTDSNAGFMDRVSAGASLLFPAGPVLMEFATMVGGRGEIKKDVDFPEAGEDTALCDKENKPPRIAQGSSNVFINNQPAARKGDKLECSAAIVEGSPDVFIGGEQVTYLDIQPEFPPWQRMILGGITIASYLLPPAGLLGKLGNLAKLGKLGNLLGKSGKLLGAKLGALLGKTGNSLKSIANKVIRWVTDPVDPVT…
A0A3U0RWU7_ECOLX	Type IV secretion protein Rhs	DN703_13990 DN729_27185 DQF01_13910 DQF10_11865 EHW09_10050	Escherichia coli	1616	MSEGPGGPQGATAGGTLAMRMLSQRAMAASQMKRAANDKAIAQMLASKKSGPPAARLGDEIQHKSFLGALAGAVLGAIVTIAEGCLIMAACATGPYALVLVPALMYASYKASDYVEEKQNQLESWINSFCDTDGAINTGSKNVKINGKPAARAAVTLPPPPPPGAIPEVPLGEPSWGDIATDLLESAAEKAVPLAKAWGNAVITLTDSNAGFMDRVSAGASLLFPAGPVLMEFATMVGGRGEIKKDVDFPEAGEDTALCDKENKPPRIAQGSSNVFINNQPAARKGDKLECSAAIVEGSPDVFIGGEQVTYLDIQPEFPPWQRMILGGITIASYLLPPAGLLGKLGNLAKLGKLGNLLGKSGKLLGAKLGALLGKTGNSLKSIANKVIRWVTDPVDPVT…
A0A3U0PRC1_ECOLX	Type IV secretion protein Rhs	D4U85_13445 D4U88_12660 D5I75_13055 D6D43_26365 D6T93_24860 D7021_19670 D8738_22980 D9568_24435 D9Y14_24365 DN635_09810 DNC50_25210 DOU81_24220 DQN01_15005 DRP48_14895 DV847_13025 EHV84_24315	Escherichia coli	1616	MSEGPGGPQGATAGGTLAMRMLSQRAMAASQMKRAANDKAIAQMLASKKSGPPAARLGDEIQHKSFLGALAGAVLGAIVTIAEGCLIMAACATGPYALVLVPALMYASYKASDYVEEKQNQLESWINSFCDTDGAINTGSKNVKINGKPAARAAVTLPPPPPPGAIPEVPQGEPSWGDIATDLLESAAEKAVPLAKAWGNAVITLTDSNAGFMDRVSAGASLLFPAGPVLMEFATMVGGRGEIKKDVDFPEAGEDTALCDKENKPPRIAQGSSNVFINNQPAARKGDKLECSAAIVEGSPDVFIGGEQVTYLDIQPEFPPWQRMILGGITIASYLLPPAGLLGKLGNLAKLGKLGNLLGKSGKLLGAKLGALLGKTGNSLKSIANKVIRWVTDPVDPVT…
A0A0H3PRP6_ECO5C	YD repeat	ECH7EC869_4426	Escherichia coli O157:H7 (strain EC869)	1616	MSEGPGGPQGATAGGTLAMRMLSQRAMAASQMKRAANDKAIAQMLASKKSGPPAARLGDEIQHKSFLGALAGAVLGAIVTIAEGCLIMAACATGPYALVLVPALMYASYKASDYVEEKQNQLESWINSFCDTDGAINTGSKNVKINGKPAARAAVTLPPPPPPGAIPEVPQGEPSWGDIATDLLESAAEKAVPLAKAWGNAVITLTDSNAGFMDRVSAGASLLFPAGPVLMEFATMVGGRGEIKKDVDFPEAGEDTALCDKENKPPRIAQGSSNVFINNQPAARKGDKLECSAAIVEGSPDVFIGGEQVTYLDIQPEFPPWQRMILGGITIASYLLPPAGLLGKLGNLAKLGKLGNLLGKSGKLLGAKLGALLGKTGNSLKSIANKVIRWVTDPVDPVT…
A0A2P1CNM8_ECOLX	Type IV secretion protein Rhs	CEP72_05600	Escherichia coli O157	1616	MSEGPGGPQGATAGGTLAMRMLSQRAMAASQMKRAANDKAIAQMLASKKSGPPAARLGDEIQHKSFLGALAGAVLGAIVTIAEGCLIMAACATGPYALVLVPALMYASYKASDYVEEKQNQLESWINSFCDTDGAINTGSKNVKINGKPAARAAVTLPPPPPPGAIPEVPQGEPSWGDIATDLLESAAEKAVPLAKAWGNAVITLTDSNAGFMDRVSAGASLLFPAGPVLMEFATMVGGRGEIKKDVDFPEAGEDTALCDKENKPPRIAQGSSNVFINNQPAARKGDKLECSAAIVEGSPDVFIGGEQVTYLDIQPEFPPWQRMILGGITIASYLLPPAGLLGKLGNLAKLGKLGNLLGKSGKLLGAKLGALLGKTGNSLKSIANKVIRWVTDPVDPVT…
C5ID01_ECOLX	RhsK (Type IV secretion protein Rhs)	rhsK AU473_23750 BTQ04_10420 BvCms35BK_01089 C9E67_22885 D7K63_11550 DAH26_14250 DL455_24575 DMI04_13310 DXX80_019470 EF173_12935	Escherichia coli	1616	MSEGPGGPQGATAGGTLAMRMLSQRAMAASQMKRAANDKAIAQMLASKKSGPPAARLGDEIQHKSFLGALAGAVLGAIVTIAEGCLIMAACATGPYALVLVPALMYASYKASDYVEEKQNQLESWINSFCDTDGAINTGSKNVKINGKPAARAAVTLPPPPPPGAIPEVPQGEPSWGDIATDLLESAAEKAVPLAKAWGNAVITLTDSNAGFMDRVSAGASLLFPAGPVLMEFATMVGGRGEIKKDVDFPEAGEDTALCDKENKPPRIAQGSSNVFINNQPAARKGDKLECSAAIVEGSPDVFIGGEQVTYLDIQPEFPPWQRMILGGITIASYLLPPAGLLGKLGNLAKLGKLGNLLGKSGKLLGAKLGALLGKTGNSLKSIANKVIRWVTDPVDPVT…
A0A0H3JCN2_ECO57	Type IV secretion protein Rhs	E5F07_06420 ECs_0605	Escherichia coli O157:H7	1616	MSEGPGGPQGATAGGTLAMRMLSQRAMAASQMKRAANDKAIAQMLASKKSGPPAARLGDEIQHKSFLGALAGAVLGAIVTIAEGCLIMAACATGPYALVLVPALMYASYKASDYVEEKQNQLESWINSFCDTDGAINTGSKNVKINGKPAARAAVTLPPPPPPGAIPEVPQGEPSWGDIATDLLESAAEKAVPLAKAWGNAVITLTDSNAGFMDRVSAGASLLFPAGPVLMEFATMVGGRGEIKKDVDFPEAGEDTALCDKENKPPRIAQGSSNVFINNQPAARKGDKLECSAAIVEGSPDVFIGGEQVTYLDIQPEFPPWQRMILGGITIASYLLPPAGLLGKLGNLAKLGKLGNLLGKSGKLLGAKLGALLGKTGNSLKSIANKVIRWVTDPVDPVT…
A0A0F6C079_ECOLX	Rhs core protein with extension	CDCO157_0589	Escherichia coli Xuzhou21	1616	MSEGPGGPQGATAGGTLAMRMLSQRAMAASQMKRAANDKAIAQMLASKKSGPPAARLGDEIQHKSFLGALAGAVLGAIVTIAEGCLIMAACATGPYALVLVPALMYASYKASDYVEEKQNQLESWINSFCDTDGAINTGSKNVKINGKPAARAAVTLPPPPPPGAIPEVPQGEPSWGDIATDLLESAAEKAVPLAKAWGNAVITLTDSNAGFMDRVSAGASLLFPAGPVLMEFATMVGGRGEIKKDVDFPEAGEDTALCDKENKPPRIAQGSSNVFINNQPAARKGDKLECSAAIVEGSPDVFIGGEQVTYLDIQPEFPPWQRMILGGITIASYLLPPAGLLGKLGNLAKLGKLGNLLGKSGKLLGAKLGALLGKTGNSLKSIANKVIRWVTDPVDPVT…
A0A3I0L2N2_ECOLX	Type IV secretion protein Rhs	EB510_06270 F7G03_15100	Escherichia coli	1616	MSEGPGGPQGATAGGTLAMRMLSQRAMAASQMKRAANDKAIAQMLASKKSGPPAARLGDEIQHKSFLGALAGAVLGAIVTIAEGCLIMAACATGPYALVLVPALMYASYKASDYVEEKQNQLESWINSFCDTDGAINTGSKNVKINGKPAARAAVTLPPPPPPGAIPEVPQGEPSWGDIATDLLESAAEKAVPLAKAWGNAVITLTDSNAGFMDRVSAGASLLFPAGPVLMEFATMVGGRGEIKKDVDFPEAGEDTALCDKENKPPRIAQGSSNVFINNQPAARKGDKLECSAAIVEGSPDVFIGGEQVTYLDIQPEFPPWQRMILGGITIASYLLPPAGLLGKLGNLAKLGKLGNLLGKSGKLLGAKLGALLGKTGNSLKSIANKVIRWVTDPVDPVT…
V6FTC8_ECOLX	RHS repeat-associated core domain protein	EC970259_0998	Escherichia coli 99.0741	1606	MSEGPGGPQGATAGGTLAMRMLSQQAMVASQMKRAANDKAIAQMLAAKKSGPPAARLGDEIQHKSFLGALAGAVLGAIVTIAEGCLIMAACATGPYALVLVPALMYASYKASDYVEEKQNQLESWINSFCDTDGAINTGSENVNINGKPAARAAVTLPPPPPPGAIPEVPQGEPSWGDIATDLLESAAEKAVPLAKAWGNAVITLTDSNAGFMDRVSAGASLLFPAGPVLMEFATMVGGRGEIKKEVDFPEAGEDSALCDKENKPPRIAQGSSNVFINNQPAARKGDKLECSAAIVEGSPDVFIGGEQVTYLDIQPEFPPWQRMILGGITIASYLLPPAGLLGKLKNLARLGKLGNLLGKSGKLLGAKLGALLGKTGKSLKSIANKVIRWVTDPVDPVT…
A0A4T5EA36_ECOLX	Type IV secretion protein Rhs	DAH18_16285	Escherichia coli	1606	MSEGPGGPQGATAGGTLAMRMLSQQAMVASQMKRAANDKAIAQMLAAKKSGPPAARLGDEIQHKSFLGALAGAVLGAIVTIAEGCLIMAACATGPYALVLVPALMYASYKASDYVEEKQNQLESWINSFCDTDGAINTGSENVNINGKPAARAAVTLPPPPPPGAIPEVPQGEPSWGDIATDLLESAAEKAVPLAKAWGNAVITLTDSNAGFMDRVSAGASLLFPAGPVLMEFATMVGGRGEIKKEVDFPEAGEDSALCDKENKPPRIAQGSSNVFINNQPAARKGDKLECSAAIVEGSPDVFIGGEQVTYLDIQPEFPPWQRMILGGITIASYLLPPAGLLGKLKNLARLGKLGNLLGKSGKLLGAKLGALLGKTGKSLKSIANKVIRWVTDPVDPVT…
A0A3T4ERI5_ECOLX	Type IV secretion protein Rhs	D8907_10030 DLY00_07485	Escherichia coli	1606	MSEGPGGPQGATAGGTLAMRMLSQQAMVASQMKRAANDKAIAQMLAAKKSGPPAARLGDEIQHKSFLGALAGAVLGAIVTIAEGCLIMAACATGPYALVLVPALMYASYKASDYVEEKQNQLESWINSFCDTDGAINTGSENVNINGKPAARAAVTLPPPPPPGAIPEVPQGEPSWGDIATDLLESAAEKAVPLAKAWGNAVITLTDSNAGFMDRVSAGASLLFPAGPVLMEFATMVGGRGEIKKEVDFPEAGEDSALCDKENKPPRIAQGSSNVFINNQPAARKGDKLECSAAIVEGSPDVFIGGEQVTYLDIQPEFPPWQRMILGGITIASYLLPPAGLLGKLKNLARLGKLGNLLGKSGKLLGAKLGALLGKTGKSLKSIANKVIRWVTDPVDPVT…
A0A3J9HH07_ECOLX	Type IV secretion protein Rhs	ED607_13435	Escherichia coli	1616	MSEGPGGPQGATAGGTLAMRMLSQRAMATSQMKRAANDKAIAQMLASKKSGPPAARLGDEIQHKSFLGALAGAVLGAIVTIAEGCLIMAACATGPYALVLVPALMYASYKASDYVEEKQNQLESWINSFCDTDGAINTGSKNVKINGKPAARAAVTLPPPPPPGAIPEVPQGEPSWGDIATDLLESAAEKAVPLAKAWGNAVITLTDSNAGFMDRVSAGASLLFPAGPVLMEFATMVGGRGEIKKDVDFPEAGEDTALCDKENKPPRIAQGSSNVFINNQPAARKGDKLECSAAIVEGSPDVFIGGEQVTYLDIQPEFPPWQRMILGGITIASYLLPPAGLLGKLGNLAKLGKLGNLLGKSGKLLGAKLGALLGKTGNSLKSIANKVIRWVTDPVDPVT…
A0A4Y9BFF0_ECOLX	Type IV secretion protein Rhs	ELV26_15785 ELV28_11275	Escherichia coli	1610	MSEGPGGPQGATAGGTLAMRMLSQQAMVASQMKRAANDKAIAQMLASKKSGPPAARLGDEIQHKSFLGALAGAVLGAIVTIAEGCLIMAACATGPYALVLVPALMYASYKASDYVEEKQNQLESWINSFCDTDGAINTGSENVNINGKPAARAAVTLPPPPPPGAIPEIPQGEPSWGDIATDLLESAAEKAVPLAKAWGNAVITLTDSNAGFMDRVSAGASLLFPAGPVLMEFATMVGGRGEIKKDVDFPEAGEDTALCDKENKPPRIAQGSSNVFINNQPAARKGDKLECSAAIVEGSPDVFIGGEQVTYLDIQPEFPPWQRMILGGITIASYLLPPAGLLGKLKNLARLGKLGNLLGKSGKLLGAKLGALLGKTGKSLKSIANKVIRWVTDPVDPVT…
A0A3P4YFX9_ECOLX	Type IV secretion protein Rhs	BON83_12835 D9D43_22495	Escherichia coli	1610	MSEGPGGPQGATAGGTLAMRMLSQQAMVASQMKRAANDKAIAQMLASKKSGPPAARLGDEIQHKSFLGALAGAVLGAIVTIAEGCLIMAACATGPYALVLVPALMYASYKASDYVEEKQNQLESWINSFCDTDGAINTGSENVNINGKPAARAAVTLPPPPPPGAIPEIPQGEPSWGDIATDLLESAAEKAVPLAKAWGNAVITLTDSNAGFMDRVSAGASLLFPAGPVLMEFATMVGGRGEIKKDVDFPEAGEDTALCDKENKPPRIAQGSSNVFINNQPAARKGDKLECSAAIVEGSPDVFIGGEQVTYLDIQPEFPPWQRMILGGITIASYLLPPAGLLGKLKNLARLGKLGNLLGKSGKLLGAKLGALLGKTGKSLKSIANKVIRWVTDPVDPVT…
A0A1X3I7R4_ECOLX	Putative RHS protein	EAMG_00004	Escherichia coli M056	1610	MSEGPGGPQGATAGGTLAMRMLSQQAMVASQMKRAANDKAIAQMLASKKSGPPAARLGDEIQHKSFLGALAGAVLGAIVTIAEGCLIMAACATGPYALVLVPALMYASYKASDYVEEKQNQLESWINSFCDTDGAINTGSENVNINGKPAARAAVTLPPPPPPGAIPEIPQGEPSWGDIATDLLESAAEKAVPLAKAWGNAVITLTDSNAGFMDRVSAGASLLFPAGPVLMEFATMVGGRGEIKKDVDFPEAGEDTALCDKENKPPRIAQGSSNVFINNQPAARKGDKLECSAAIVEGSPDVFIGGEQVTYLDIQPEFPPWQRMILGGITIASYLLPPAGLLGKLKNLARLGKLGNLLGKSGKLLGAKLGALLGKTGKSLKSIANKVIRWVTDPVDPVT…
A0A4Q0BKS5_ECOLX	Type IV secretion protein Rhs	EQ820_15465	Escherichia coli	1610	MSEGPGGPQGATAGGTLAMRMLSQQAMVASQMKRAANDKAIAQMLASKKSGPPAARLGDEIQHKSFLGALAGAVLGAIVTIAEGCLIMAACATGPYALVLVPALMYASYKASDYVEEKQNQLESWINSFCDTDGAINTGSENVNINGKPAARAAVTLPPPPPPGAIPEIPQGEPSWGDIATDLLESAAEKAVPLAKAWGNAVITLTDSNAGFMDRVSAGASLLFPAGPVLMEFATMVGGRGEIKKDVDFPEAGEDTALCDKENKPPRIAQGSSNVFINNQPAARKGDKLECSAAIVEGSPDVFIGGEQVTYLDIQPEFPPWQRMILGGITIASYLLPPAGLLGKLKNLARLGKLGNLLGKSGKLLGAKLGALLGKTGKSLKSIANKVIRWVTDPVDPVT…
A0A376K0P2_ECOLX	Rhs core protein with extension	wapA_5 NCTC10764_05084	Escherichia coli	1609	MSEGPGGPQGATAGGTLAMRMLSQQAMVASQMKRAANDKAIAQMLASKKSGPPAARLGDEIQHKSFLGALAGAVLGAIVTIAEGCLIMAACATGPYALVLVPALMYASYKASDYVEEKQNQLESWINSFCDTDGAINTGSKNVKINGELAARAAVTLPPPPPPGAIPEVPQGDPSWGDIATDLLESAAEKAVPLAKAWGNAVITLTDSNAGIMDRVSAGASLLFPAGPVLMEFATMVGGRGEIKKDVDFPEAGEDTALCDKENKPPRIAQGSSNVFINNQPAARKGDKLECSAAIVEGSPDVFIGGEQVTYLDIQPEFPPWQRMILGGITIASYLLPPAGLLGKLKNLAKLGKLGNLLGNSGKLLGAKLGALLGKTGKSLKSIANKVIRWVTDPVDPVT…
A0A2T3S1C9_ECOLX	Type IV secretion protein Rhs	C7B06_27240 C7B07_27235	Escherichia coli	1625	MSEGPGGPQGATAGGTLAMRMLSQQAMVASQMKRAANDKAIAQMLASKKSGPPAARLGDEIQHKSFLGALAGAVLGAIVTIAEGCLIMAACATGPYALVLVPALMYASYKASDYVEEKQNQLESWINSFCDTDGAINTGSENVKINGKPAARAAVTLPPPPPPGAIPEVPQGEPSWGDIATDLLESAAEKAVPLAKAWGNAVITLTDSNASFMDRVSAGASLLFPAGPVLMEFATMVGGRGEIKKDVDFPEAGEDTALCDKENKPPRIAQGSSNVFINNQPAARKGDKLECSAAIVEGSPDVFIGGEQVTYLDIQPEFPPWQRMILGGITIASYLLPPAGLLGKLGNLAKLGKLGNLLGKSGKLLGAKLGALLGKTGKSLKSIANKVIRWVTDPVDPVT…
A0A3Y6RI92_ECOLX	Type IV secretion protein Rhs	EBD34_24180	Escherichia coli	1599	MSEGPGGPQGATAGGTLAMRMLSQQAMVASQMKRAANDKAIAQMLAAKKSGPPAARLGDEIQHKSFLGALAGAVLGAIVTIAEGCLIMAACATGPYALVLVPALMYASYKASDYVEEKQNQLESWINSFCDTDGAINTGSENVNINGKPAARAAVTLPPPPPPGAIPEIPQGEPSWGDIATDLLESAAEKAVPLAKAWGNAVITLTESNAGFMDRVSAGASLLFPAGPVLMEFATMVGGRGEIKKDVDFPEAGEDTALCDKENKPPRIAQGSSNVFINNQPAARKGDKLECSAAIVEGSPDVFIGGEQVTYLDIQPEFPPWQRMILGGITIASYLLPPAGLLGKLGNLAKLGKLGNLLGKSGKLLGAKLGALLGKTGKSLKSIANKVIRWVTDPVDPVT…
A0A3Z5QU27_ECOLX	Type IV secretion protein Rhs	D4I42_24425	Escherichia coli	1608	MSEGPGGPQGATAGGTLAMRMLSQQAMVASQMKRAANDKAIAQMLAAKKSGPPAARLGDEIQHKSFLGALAGAVLGAIVTIAEGCLIMAACATGPYALVLVPALMYASYKASDYVEEKQNQLESWINSFCDTDGAINTGSENVNINGKPAARAAVTLPPPPPPGAIPEVPQGEPSWGDIATDLLESAAEKAVPLAKAWGNAVITLTDSNAGFMDRLCAGTSLLFPAGPVLMEFATMVGGRGEIKKDVDFPEAGEDTALCDKENKPPRIAQGSSNVFINNQPAARKGDKLECSAAIVEGSPDVFIGGEQVTYLDIQPEFPPWQRMILGGITIASYLLPPAGLLGKLGNLAKLGKLGNLLGKSGKLLGAKLGALLSRTKNALKNTYNVLKKFIKDPVDPVT…
A0A2Y0CK31_ECOLX	Rhs core protein with extension	wapA_3 SAMEA3484434_00135	Escherichia coli	1620	MSEGPGGPQGATAGGTLAMRMLSQQAMVASQMKRAANDKAIAQMLASKKSGPPAARLGDEIQHKSFLGALAGAVLGAIVTIAEGCLIMAACATGPYALVLVPALMYASYKASDYVEEKQNQLESWINSFCDTDGAINTGSENVNINGKPAARAAVTLPPPPPPGAIPEIPQGEPSWGDIATDLLESAAEKAVPLAKAWGNAVITLTDSNAGFMDRVSAGASLLFPAGPVLMEFATMVGGRGEIKKDVDFPEAGEDTALCDKENKPPRIAQGSSNVFINNQPAARKGDKLECSAAIVEGSPDVFIGGEQVTYLDIQPEFPPWQRMILGGITIASYLLPPAGLLGKLKNLARLGKLGNLLGKSGKLLGAKLGALLGKTGKSLKSIANKVIRWVTDPVDPVT…
A0A2J7KRN7_ECOLX	Type IV secretion protein Rhs	DD762_18780	Escherichia coli	1620	MSEGPGGPQGATAGGTLAMRMLSQQAMVASQMKRAANDKAIAQMLASKKSGPPAARLGDEIQHKSFLGALAGAVLGAIVTIAEGCLIMAACATGPYALVLVPALMYASYKASDYVEEKQNQLESWINSFCDTDGAINTGSENVNINGKPAARAAVTLPPPPPPGAIPEIPQGEPSWGDIATDLLESAAEKAVPLAKAWGNAVITLTDSNAGFMDRVSAGASLLFPAGPVLMEFATMVGGRGEIKKDVDFPEAGEDTALCDKENKPPRIAQGSSNVFINNQPAARKGDKLECSAAIVEGSPDVFIGGEQVTYLDIQPEFPPWQRMILGGITIASYLLPPAGLLGKLKNLARLGKLGNLLGKSGKLLGAKLGALLGKTGKSLKSIANKVIRWVTDPVDPVT…
A0A1M2ETD1_ECOLX	Type IV secretion protein Rhs	BK375_15520 D9G48_19405	Escherichia coli	1620	MSEGPGGPQGATAGGTLAMRMLSQQAMVASQMKRAANDKAIAQMLASKKSGPPAARLGDEIQHKSFLGALAGAVLGAIVTIAEGCLIMAACATGPYALVLVPALMYASYKASDYVEEKQNQLESWINSFCDTDGAINTGSENVNINGKPAARAAVTLPPPPPPGAIPEIPQGEPSWGDIATDLLESAAEKAVPLAKAWGNAVITLTDSNAGFMDRVSAGASLLFPAGPVLMEFATMVGGRGEIKKDVDFPEAGEDTALCDKENKPPRIAQGSSNVFINNQPAARKGDKLECSAAIVEGSPDVFIGGEQVTYLDIQPEFPPWQRMILGGITIASYLLPPAGLLGKLKNLARLGKLGNLLGKSGKLLGAKLGALLGKTGKSLKSIANKVIRWVTDPVDPVT…
A0A3L4X8V5_ECOLX	Type IV secretion protein Rhs	D9D31_26005 D9E34_23940	Escherichia coli	1620	MSEGPGGPQGATAGGTLAMRMLSQQAMVASQMKRAANDKAIAQMLASKKSGPPAARLGDEIQHKSFLGALAGAVLGAIVTIAEGCLIMAACATGPYALVLVPALMYASYKASDYVEEKQNQLESWINSFCDTDGAINTGSENVNINGKPAARAAVTLPPPPPPGAIPEIPQGEPSWGDIATDLLESAAEKAVPLAKAWGNAVITLTDSNAGFMDRVSAGASLLFPAGPVLMEFATMVGGRGEIKKDVDFPEAGEDTALCDKENKPPRIAQGSSNVFINNQPAARKGDKLECSAAIVEGSPDVFIGGEQVTYLDIQPEFPPWQRMILGGITIASYLLPPAGLLGKLKNLARLGKLGNLLGKSGKLLGAKLGALLGKTGKSLKSIANKVIRWVTDPVDPVT…
I2RQJ1_ECOLX	RHS repeat-associated core domain protein	EC970246_0681	Escherichia coli 97.0246	1620	MSEGPGGPQGATAGGTLAMRMLSQQAMVASQMKRAANDKAIAQMLAAKKSGPPAARLGDEIQHKSFLGALAGAVLGAIVTIAEGCLIMAACATGPYALVLVPALMYASYKASDYVEEKQNQLESWINSFCDKDGAINTGSKNVNINGKPAARAAVTLPPPPPPGAIPEVPQGEPSWGDIATDLLESAAEKAVPLAKAWGNAVITLTDSNAGFMDRVSAGASLLFPAGPVLMEFATMVGGRGEIKKDLDFPEAGEDTALCDKENKPPRIAQGSSNVFINNQPAARKGDKLECSAAIVEGSPDVFIGGEQVTYLDIQPEFPPWQRMILGGITIASYLLPPAGLLGKLKNLARLGKLGNLLGKSGKLLGAKLGALLGKTGKSLKSIANKVIRWVTDPVDPVT…
A0A1U9T0D3_ECOLX	Type IV secretion protein Rhs	BE963_16930 FNJ79_22830	Escherichia coli	1620	MSEGPGGPQGATAGGTLAMRMLSQQAMVASQMKRAANDKAIAQMLASKKSGPPAARLGDEIQHKSFLGALAGAVLGAIVTIAEGCLIMAACATGPYALVLVPALMYASYKASDYVEEKQNQLESWINSFCDTDGAINTGSENVNINGKPAARAAVTLPPPPPPGAIPEIPQGEPSWGDIATDLLESAAEKAVPLAKAWGNAVITLTDSNAGFMDRVSAGASLLFPAGPVLMEFATMVGGRGEIKKDVDFPEAGEDTALCDKENKPPRIAQGSSNVFINNQPAARKGDKLECSAAIVEGSPDVFIGGEQVTYLDIQPEFPPWQRMILGGITIASYLLPPAGLLGKLKNLARLGKLGNLLGKSGKLLGAKLGALLGKTGKSLKSIANKVIRWVTDPVDPVT…
A0A3T5QRP3_ECOLX	Type IV secretion protein Rhs	DL654_23265 EF082_24125	Escherichia coli	1620	MSEGPGGPQGATAGGTLAMRMLSQQAMVASQMKRAANDKAIAQMLASKKSGPPAARLGDEIQHKSFLGALAGAVLGAIVTIAEGCLIMAACATGPYALVLVPALMYASYKASDYVEEKQNQLESWINSFCDTDGAINTGSENVNINGKPAARAAVTLPPPPPPGAIPEIPQGEPSWGDIATDLLESAAEKAVPLAKAWGNAVITLTDSNAGFMDRVSAGASLLFPAGPVLMEFATMVGGRGEIKKDVDFPEAGEDTALCDKENKPPRIAQGSSNVFINNQPAARKGDKLECSAAIVEGSPDVFIGGEQVTYLDIQPEFPPWQRMILGGITIASYLLPPAGLLGKLKNLARLGKLGNLLGKSGKLLGAKLGALLGKTGKSLKSIANKVIRWVTDPVDPVT…
A0A4Y8GM95_ECOLX	Type IV secretion protein Rhs	BON96_18090	Escherichia coli	1620	MSEGPGGPQGATAGGTLAMRMLSQQAMVASQMKRAANDKAIAQMLASKKSGPPAARLGDEIQHKSFLGALAGAVLGAIVTIAEGCLIMAACATGPYALVLVPALMYASYKASDYVEEKQNQLESWINSFCDTDGAINTGSENVNINGKPAARAAVTLPPPPPPGAIPEIPQGEPSWGDIATDLLESAAEKAVPLAKAWGNAVITLTDSNAGFMDRVSAGASLLFPAGPVLMEFATMVGGRGEIKKDVDFPEAGEDTALCDKENKPPRIAQGSSNVFINNQPAARKGDKLECSAAIVEGSPDVFIGGEQVTYLDIQPEFPPWQRMILGGITIASYLLPPAGLLGKLKNLARLGKLGNLLGKSGKLLGAKLGALLGKTGKSLKSIANKVIRWVTDPVDPVT…
A0A3W4PQG3_ECOLX	Type IV secretion protein Rhs	EBA78_04715	Escherichia coli	1620	MSEGPGGPQGATAGGTLAMRMLSQQAMVASQMKRAANDKAIAQMLAAKKSGPPAARLGDEIQHKSFLGALAGAVLGAIVTIAEGCLIMAACATGPYALVLVPALMYASYKASDYVEEKQNQLESWINSFCDKDGAINTGSKNVNINGKPAARAAVTLPPPPPPGAIPEVPQGEPSWGDIATDLLESAAEKAVPLAKAWGNAVITLTDSNAGFMDRVSAGASLLFPAGPVLMEFATMVGGRGEIKKDLDFPEAGEDTALCDKENKPPRIAQGSSNVFINNQPAARKGDKLECSAAIVEGSPDVFIGGEQVTYLDIQPEFPPWQRMILGGITIASYLLPPAGLLGKLKNLARLGKLGNLLGKSGKLLGAKLGALLGKTGKSLKSIANKVIRWVTDPVDPVT…
A0A1V3CIE9_ECOLX	Type IV secretion protein Rhs	BWP17_15335 CVH05_23310 DAH43_11900	Escherichia coli	1645	MSEGPGGPQGATAGGTLAMRMLSQRAMAASQMKRAANDKAIAQMLASKKSGPPAARLGDEIQHKSFLGALAGAVLGAIVTIAEGCLIMAACATGPYALVLVPALMYASYKASDYVEEKQNQLESWINSFCDTDGAINTGSKNVKINGKPAARAAVTLPPPPPPGAIPEVPQGEPSWGDIATDLLESAAEKAVPLAKAWGNAVITLTDSNAGFMDRVSAGASLLFPAGPVLMEFATMVGGRGEIKKDVDFPEAGEDTALCDKENKPPRIAQGSSNVFINNQPAARKGDKLECSAAIVEGSPDVFIGGEQVTYLDIQPEFPPWQRMILGGITIASYLLPPAGLLGKLGNLAKLGKLGNLLGKSGKLLGAKLGALLGKTGNSLKSIANKVIRWVTDPVDPVT…
Q8X4B0_ECO57	Uncharacterized protein	Z0705	Escherichia coli O157:H7	1645	MSEGPGGPQGATAGGTLAMRMLSQRAMAASQMKRAANDKAIAQMLASKKSGPPAARLGDEIQHKSFLGALAGAVLGAIVTIAEGCLIMAACATGPYALVLVPALMYASYKASDYVEEKQNQLESWINSFCDTDGAINTGSKNVKINGKPAARAAVTLPPPPPPGAIPEVPQGEPSWGDIATDLLESAAEKAVPLAKAWGNAVITLTDSNAGFMDRVSAGASLLFPAGPVLMEFATMVGGRGEIKKDVDFPEAGEDTALCDKENKPPRIAQGSSNVFINNQPAARKGDKLECSAAIVEGSPDVFIGGEQVTYLDIQPEFPPWQRMILGGITIASYLLPPAGLLGKLGNLAKLGKLGNLLGKSGKLLGAKLGALLGKTGNSLKSIANKVIRWVTDPVDPVT…
A0A3Y8M1C4_SALET	RHS repeat protein (Fragment)	D4F39_23100	Salmonella enterica I	1093	MYEAARVDDPVYHTSALAGFLIGAIIGIAIIALAAFALFTCGFLAGLVLGFMADQIASGVLQLGEAIGRSIHHTAGKILTGSENVSTNSRPAARAVLSTVKCDNHIAEKRIAQGSENIYINSQPAARKDDHTECDAVIEDGSPNVFLGGGTQTVLEISSEIPDWLRKVVDVLFVVASLLGGLAGAWRQAAKLGTKFGTKCAAKFIGGELVGMAVGEAISGLFSNPVDVTTGQKILLPETDFTLPGRLPVTCSRFYASHLETVGLLGRGWRLNWETSLREDDEHITLTGVQGRELRYPKTMLTPGHQIFDPEEQLYLSRLHDGRYVLHYTDRSYYVFGDFDSDGMAYLLFMETPHRQRIVFGHEGGRLVRIASSSGHHLLLHRTQTPAGERLSRIELVQG…
A0A4T8Y651_ECOLX	Type IV secretion protein Rhs	C9Z26_13485	Escherichia coli	1610	MSEGPGGPQGATAGGTLAMRMLSQQAMVASQMKRAANDKAIAQMLASKKSGPPAARLGDEIQHKSFLGALAGAVLGAIVTIAEGCLIMAACATGPYALVLVPALMYASYKASDYVEEKQNQLESWINSFCDTDGAINTGSENVNINGKPAARAAVTLPPPPPPGAIPEIPQGEPSWGDIATDLLESAAEKAVPLAKAWGNAVITLTDSNAGFMDRVSAGASLLFPAGPVLMEFATMVGGRGEIKKDVDFPEAGEDTALCDKENKPPRIAQGSSNVFINNQPAARKGDKLECSAAIVEGSPDVFIGGEQVTYLDIQPEFPPWQRMILGGITIASYLLPPAGLLGKLKNLARLGKLGNLLGKSGKLLGAKLGALLGKTGKSLKSIANKVIRWVTDPVDPVT…
A0A3U2E1S3_ECOLX	Type IV secretion protein Rhs (Fragment)	D4V07_26935 DL530_26670 DLW60_28065 DOY49_26530 DSZ47_26985	Escherichia coli	573	MSEGPGGPQGATAGGTLAMRMLSQQAMVASQMKRAANDKAIAQMLAAKKSGPPAARLGDEIQHKSFLGALAGAVLGAIVTIAEGCLIMAACATGPYALVLVPALMYASYKASDYVEEKQNQLESWINSFCDTDGAINTGSENVNINGKPAARAAVTLPPPPPPGAIPEIPQGEPSWGDIATDLLESAAEKAVPLAKAWGNAVITLTESNAGFMDRVSAGASLLFPAGPVLMEFATMVGGRSEIKKDVDFPEAGEDTALCDKENKPPRIAQGSSNVFINNQPAARKGDKLECSAAIVGGSPDVFIGGEQVTYLDIQPEFPPWQRMILGGITIASYLLPPAGLLGKLKNLARLGKLGNLLGKSGKLLGAKLGALLGKTGKSLKSIANKVIRWVTDPVDPVT…
A0A4Q0WVM3_ECOLX	Type IV secretion protein Rhs	ERL57_11985	Escherichia coli	1601	MSEGPGGPQGATAGGTLAMRMLSQQAMVASQMKRAANDKAIAQMLASKKSGPPAARLGDEIQHKSFLGALAGAVLGAIVTIAEGCLIMAACATGPYALVLVPALMYASYKASDYVEEKQNQLESWINSFCDTDGAINTGSENVKINGELAARAAVTLPPPPPPGAIPEVPQGDPSWGDIATDLLESAAEKAVPLAKAWGNAVITLTDSNAGIMDRVSAGASLLFPAGPVLMEFATMVGGRGEIKKDVDFPEAGKDTALCDKENKPPRIAQGSSNVFINNQPAARKGDKLECSAAIVEGSPDVFIGGEQVTYLDIQPEFPPWQRMILGGITIASYLLPPAGLLGKLGNLAKLGKLGNLLGKSGKLLGAKLGALLSRTKNALKNTYNVLKKFIKDPVDPVT…
A0A3Z7UM62_ECOLX	Type IV secretion protein Rhs	D4U30_25865	Escherichia coli	1616	MSEGPGGPQGATAGGTLAMRMLSQRAMAASQMKRAANDKAIAQMLASKKSGPPAARLGDEIQHKSFLGALAGAVLGAIVTIAEGCLIMAACATGPYALVLVPALMYASYKASDYVEEKQNQLESWINSFCDTDGAINTGSKNVKINGKPAARAAVTLPPPPPPGAIPEVPQGEPSWGDIATDLLESAAEKAVPLAKAWGNAVITLTDSNAGFMDRVSAGASLLFPAGPVLMEFATMVGGRGEIKKDVDFPEAGEDTALCDKENKPPRIAQGSSNVFINNQPAARKGDKLECSAAIVEGSPDVFIGGEQVTYLDIQPEFPPWQRMILGGITIASYLLPPAGLLGKLGNLAKLGKLGNLLGKSGKLLGAKLGALLGKTGNSLKSIANKVIRWVTDPVDPVT…
A0A400XDD8_ECOLX	Type IV secretion protein Rhs	EB476_17715	Escherichia coli	1620	MSEGPGGPQGATAGGTLAMRMLSQQAMVASQMKRAANDKAIAQMLAAKKSGPPAARLGDEIQHKSFLGALAGAVLGAIVTIAEGCLIMAACATGPYALVLVPALMYASYKASDYVEEKQNQLESWINSFCDTDGAINTGSENVNINGKPAARAAVTLPPPPPPGAIPEVPQGEPSWGDIATDLLESAAEKAVPLAKAWGNAVITLTDSNAGFMDRLCAGTSLLFPAGPVLMEFATMVGGRGEIKKDVDFPEAGEDTALCDKENKPPRIAQGSSNVFINNQPAARKGDKLECSAAIVEGSPDVFIGGEQVTYLDIQPEFPPWQRMILGGITIASYLLPPAGLLGKLGNLAKLGKLGNLLGKSGKLLGAKLGALLSRTKNALKNTYNVLKKFIKDPVDPVT…
A0A401A5X8_ECOLX	Type IV secretion protein Rhs	D7W27_24115	Escherichia coli	1620	MSEGPGGPQGATAGGTLAMRMLSQQAMVASQMKRAANDKAIAQMLAAKKSGPPAARLGDEIQHKSFLGALAGAVLGAIVTIAEGCLIMAACATGPYALVLVPALMYASYKASDYVEEKQNQLESWINSFCDTDGAINTGSENVNINGKPAARAAVTLPPPPPPGAIPEVPQGEPSWGDIATDLLESAAEKAVPLAKAWGNAVITLTDSNAGFMDRLCAGTSLLFPAGPVLMEFATMVGGRGEIKKDVDFPEAGEDTALCDKENKPPRIAQGSSNVFINNQPAARKGDKLECSAAIVEGSPDVFIGGEQVTYLDIQPEFPPWQRMILGGITIASYLLPPAGLLGKLGNLAKLGKLGNLLGKSGKLLGAKLGALLSRTKNALKNTYNVLKKFIKDPVDPVT…
A0A4Y9WWY4_ECOLX	Type IV secretion protein Rhs	DEN89_13490	Escherichia coli	1599	MSEGPGGPQGATAGGTLAMRMLSQQAMVASQMKRAANDKAIAQMLAAKKSGPPAARLGDEIQHKSFLGALAGAVLGAIVTIAEGCLIMAACATGPYALVLVPALMYASYKASDYVEEKQNQLESWINSFCDTDGAINTGSENVNINGKPAARAAVTLPPPPPPGAIPEVPQGEPSWGDIATDLLESAAEKAVPLAKAWGNAVITLTDSNAGFMDRLCAGTSLLFPAGPVLMEFATMVGGRGEIKKDVDFPEAGEDTALCDKENKPPRIAQGSSNVFINNQPAARKGDKLECSAAIVEGSPDVFIGGEQVTYLDIQPEFPPWQRMILGGITIASYLLPPAGLLGKLGNLAKLGKLGNLLGKSGKLLGAKLGALLSRTKNALKNTYNVLKKFIKDPVDPVT…
A0A376MT30_ECOLX	Rhs core protein	NCTC11112_04108	Escherichia coli	469	MSEGPGGPQGATAGGTLAMRMLSQQAMVASQMKRAANDKAIAQMLASKKSGPPAARLGDEIQHKSFLGALAGAVLGAIVTIAEGCLIMAACATGPYALVLVPALMYASYKASDYVEEKQNQLESWINSFCDTDGAINTGSENVNINGKPAVRAAVTLPPPPPPGAIPEIPQGEPSWGDIATDLLESAAEKAVPLAKAWGNAVITLTDSNAGFMDRVSAGASLLFPAGPVLMEFATMVGGRGEIKKDVDFPEAGEDTALCDKENKPPRIAQGSSNVFINNQPAARKGDKLECSAAIVEGSPDVFIGGEQVTYLDIQPEFPPWQRMILGGITIASYLLPPAGLLGKLKNLARLGKLGNLLGKSGKLLGAKLGALLGKTGKSLKSIANKVIRWVTDPVDPVT…
A0A4T5ZJ48_ECOLX	Type IV secretion protein Rhs	C9270_22500	Escherichia coli	1599	MSEGPGGPQGATAGGTLAMRMLSQQAMVASQMKRAANDKAIAQMLAAKKSGPPAARLGDEIQHKSFLGALAGAVLGAIVTIAEGCLIMAACATGPYALVLVPALMYASYKASDYVEEKQNQLESWINSFCDTDGAINTGSENVNINGKPAARAAVTLPPPPPPGAIPEVPQGEPSWGDIATDLLESAAEKAVPLAKAWGNAVITLTDSNAGFMDRLCAGTSLLFPAGPVLMEFATMVGGRGEIKKDVDFPEAGEDTALCDKENKPPRIAQGSSNVFINNQPAARKGDKLECSAAIVEGSPDVFIGGEQVTYLDIQPEFPPWQRMILGGITIASYLLPPAGLLGKLGNLAKLGKLGNLLGKSGKLLGAKLGALLSRTKNALKNTYNVLKKFIKDPVDPVT…
A0A3U1K3F2_ECOLX	Type IV secretion protein Rhs	DOS12_25095	Escherichia coli	1619	MSEGPGGPQGATAGGTLAMRMLSQQAMVASQMKRAANDKAIAQMLAAKKSGPPAARLGDEIQHKSFLGALAGAVLGAIVTIAEGCLIMAACATGPYALVLVPALMYASYKASDYVEEKQNQLESWINSFCDTDGAINTGSENVNINGKPAARAAVTLPPPPPPGAIPEVPQGEPSWGDIATDLLESAAEKAVPLAKAWGNAVITLTDSNAGFMDRLCAGTSLLFPAGPVLMEFATMVGGRGEIKKDVDFPEAGEDTALCDKENKPPRIAQGSSNVFINNQPAARKGDKLECSAAIVEGSPDVFIGGEQVTYLDIQPEFPPWQRMILGGITIASYLLPPAGLLGKLGNLAKLGKLGNLLGKSGKLLGAKLGALLSRTKNALKNTYNVLKKFIKDPVDPVT…
A0A3Z8JQT2_ECOLX	Type IV secretion protein Rhs	D6I82_21610	Escherichia coli	1599	MSEGPGGPQGATAGGTLAMRMLSQQAMVASQMKRAANDKAIAQMLAAKKSGPPAARLGDEIQHKSFLGALAGAVLGAIVTIAEGCLIMAACATGPYALVLVPALMYASYKASDYVEEKQNQLESWINSFCDTDGAINTGSENVNINGKPAARAAVTLPPPPPPGAIPEVPQGEPSWGDIATDLLESAAEKAVPLAKAWGNAVITLTDSNAGFMDRLCAGTSLLFPAGPVLMEFATMVGGRGEIKKDVDFPEAGEDTALCDKENKPPRIAQGSSNVFINNQPAARKGDKLECSAAIVEGSPDVFIGGEQVTYLDIQPEFPPWQRMILGGITIASYLLPPAGLLGKLGNLAKLGKLGNLLGKSGKLLGAKLGALLSRTKNALKNTYNVLKKFIKDPVDPVT…
A0A3L2NWS9_ECOLX	Type IV secretion protein Rhs (Fragment)	D9J03_26600	Escherichia coli	1042	MSEGPGGPQGATAGGTLAMRMLSQQAMVASQMKRAANDKAIAQMLASKKSGPPAARLGDEIQHKSFLGALAGAVLGAIVTIAEGCLIIAACATGPYALVLVPALMYASYKASDYVEEKQNQLESWINSFCDKDGAINTGSKNVNINGKPAARAAVTLPPPPLTEAIPSPPQGEPSWGDIATDLLESAAEKAVPLAKAWGNAVITLTDSNASFMDRLCAGTSLLFPYGPVLMEFATMVGGRGEIKKDVDFPEAGEDTALCDKETKPPRIAQGSSNVFINNQPAARKGDKLECSAAIVEGSPDVFIGGEQVTYLDIQPEFPPWQRMILGGITIASYLLPPAGLLGKMKNLARLGKLGNLLGKSGKLLGAKLGALLSRTKNALKNTYNVLKKFIKDPVDPVT…
A0A3Z8BVK5_ECOLX	Type IV secretion protein Rhs (Fragment)	D4V03_27605 D7Z87_26125 DL473_27640 DM155_27145 DOZ28_27370 DTY46_26770 DV849_27090 DVB38_26465	Escherichia coli	604	MSEGPGGPQGATAGGTLAMRMLSQQAMVASQMKRAANDKAIAQMLAAKKSGPPAARLGDEIQHKSFLGALAGAVLGAIVTIAEGCLIMAACATGPYALVLVPALMYASYKASDYVEEKQNQLESWINSFCDTDGAINTGSENVNINGKPAARAAVTLPPPPPPGAIPEIPQGEPSWGDIATDLLESAAEKAVPLAKAWGNAVITLTESNAGFMDRVSAGASLLFPAGPVLMEFATMVGGRSEIKKDVDFPEAGEDTALCDKENKPPRIAQGSSNVFINNQPAARKGDKLECSAAIVGGSPDVFIGGEQVTYLDIQPEFPPWQRMILGGITIASYLLPPAGLLGKLKNLARLGKLGNLLGKSGKLLGAKLGALLGKTGKSLKSIANKVIRWVTDPVDPVT…
A0A3M6CQW0_9PSED	YD repeat protein (Fragment)	ALP10_05152	Pseudomonas syringae pv. helianthi	500	MGLPHCFFCSGLAGVGAMFEAARFGDEISHSSALGGFLIGAVLGIALIATVAIATFTCGFGVALLAGLAAGVGGSLLTAAGEAIGSMFSSPSGTILTASPNVYINNRKAAHVEKSIGACDKHPGPVKIAEGSTNVFINSVAAARKGDKLTCGATISGGSNNVFIGGGRYRYLPVDDEIPGWLRTTVDVLMAVAGAAGGIAQLIKAGTQAGMKAVLPCAMKFTAGFVAGEVGSRYVVEPVMRSAIGGLSGNPVDTTTGRKLIPDEIDFSLPGLMPIEWSRFYASNLNVDSVLGKGWVLPWEQSLRKRGSFVYLTDNQGRTVPFVDIAPGQRIYNPHEQVYLVCTQGGHYLLQTLDNIFFYFGEVPDDNKPVPLDRIENALGHFLHFTRTEQGTLTDISAT…
K9DSM5_9BURK	YD repeat (Two copies)	HMPREF9710_02929	Massilia timonae CCUG 45783	1424	MFEAARLTDPIAHTSALEGFLVGAVIGIALIAAVAFATFTCGFGVALLAGLAAGIGATAILGLGEAIGRMFSNPSGTLGSASPDVFVNRLGAACTTMSTAICDKHNPAPLVVEGSGSVFINGLPAARKDDAITCGAKIDDGSHDVFIGGGRVGYLPVEDEVPEWLRTTVGWAFALAGLVGGLAGLVKAAGGLSRAVVPCAAKFIGGFMLGEAVGHYVAEPVVRRVMGGLYGRPVEVATGRKVLLAQDEVDFVVPGPLPIVLARFYASDLALDASPGGGLGAGWVLPWELRLQRRDERLWLRDAQGRETGFPPMAPGQALYSAGEQRYLVRARDGRYLMVDLNERYYDFGQLDQGPDAVAWLQRIEDRCGQWQAFARDDAGRVRAIRASGGLDLRLDYCP…
A0A1X7HAK8_TRICW	RHS repeat-associated core domain-containing protein	SAMN06295900_12532	Trinickia caryophylli (Paraburkholderia caryophylli)	1440	MFEAARVTDPIEHTSALTGFLIGAALGIALIAAVAFATFTCGFGVALLAGLAAGVGASGLLSLGESIGKMFTSTTGAIISGSSNVFINGKSAAYATASGVTCSKHSPLPLVAQGSSGVFINGKPAARKGDKITCGASIEDGSHNTFIAGGTSTYLPYDDEVPPWLRTAVDWAFALAGLVGGLAGLVKAAGGLSRCVLPCAAKFIGGYVIGEVVGRYVAGPIISRAMGGLFGHPVDVTTGRKILLADDETDFVVPSPLPVVCSRFYASNLTAEGTLGRGWVLPWELRLQPRDGRLWYTDAQGRESGFPLIERGHTAFSEADQRYLTCTPDGRYILYDLGETYYDFGRVDRTSDRIAWVRRIEDQAGQWQQFERDSQGRVRTILTSGGVQLALDYEAGHGR…
A0A3Z4N2I2_SALET	RHS repeat protein	D5848_10860	Salmonella enterica I	1359	MYEAARVDDPVYHTSALAGFLIGAIIGIAIIALAAFAFFSCGFLAGLILGFMADQIASGVLQLGEAIGRSIHHTAGKILTGSENVSTNSRPAARAVLSTVKCDNHIAEKRIAQGSENIYINSQPAARKDDHTECDAVIEDGSPDVFLGGGTQTVLEISSEIPDWLRKVVDVLFVVAGLLGGLAGAWRQAAKLGTKFGTKCAAKFIGGELTGMAVSEAISGLFSNPVDVTTGQKILLPETDFTLPGRLPVACSRFYASHLETVGLLGRGWRLNWETSLREDDEHLTLTGVQGRELSYPKTMLTPGHQIFDPEEQLYLSRLHDGRYVLHYTDRSYYVFGDFDSDGMAYLRFMETPHRQRIVFGHEGGRLVRIASSSGHHLLLHRTQTPAGERLSRIELVQG…
A0A3U8YPU4_SALET	RHS repeat protein	DQR27_03190	Salmonella enterica I	1359	MYEAARVDDPIYHTSSLAGFLIGAIIGIAIIAIAAFALFSCGILAGLILGFMADQIASGVLQLGEAIGRSIHHTAGKILTGSENVSTNSRPAARAVLSTVKCDNHIAEKRIAQGSGNIYINSQPAARKDDHTECDAVIEDGSPNVFLGGGTQTVLEISSEIPDWLRKVVDVLFVVASLLGGLAGAWRQAAKLGTKFGTKCAAKFIGGELVGMAVGEAISGLFSNPVDVTTGQKILLPETDFTLPGRLPVTCSRFYASHLETVGLLGRGWRLNWETSLREDDEHITLTGVQGRELRYPKTMLTPGHQIFDPKEQLYLSRLHDGRYVLHYTDRSYYVFGDFDSDGMAYLLFMETPHRQRIVFGHEGGRLVRIASSSGHHLLLHRTQTPAGERLSRIELVQG…
A0A2A3WRV7_ECOLX	Type IV secretion protein Rhs	BB545_14325	Escherichia coli	1601	MSEGPGGPQGATAGGTLAMRMLSQQAMVASQMKRAANDKAIAQMLAAKKSGPPAARQGDEIQHKSFLGALAGAVLGAIVTIAEGCLIMAACATGPYALVLVPALMYASYKASDYVEEKQNQLESWINSFCDTDGAINTGSENVKINGELAARAAVTLPPPPPPGAIPEVPQGEPSWGDIATDLLESAAEKAVPLAKAWGNAVITLTDSNAGFMDRVSAGASLLFPAGPVLMEFATMVGGRGEIKKEVDFPEAGEDSALCDKENKPPRIAQGSSNVFINNQPAARKGDKLECSAAIVEGSPDVFIGGEQVTYLDIQPEFPPWQRMILGGITIASYLLPPAGLLGKLKNLARLGKLGNLLGKSGKLLGAKLGALLGKTGKSLKSIANKVIRWVTDPVDPVT…
A0A4D2ED98_ECOLX	Type IV secretion protein Rhs	BvCmsNSP072_02318	Escherichia coli	1610	MSEGPGGPQGATAGGTLAMRMLSQQAMVASQMKRAANDKAIAQMLAAKKSGPPAARQGDEIQHKSFLGALAGAVLGAIVTIAEGCLIMAACATGPYALVLVPALMYASYKASDYVEEKQNQLESWINSFCDTDGAINTGSENVKINGELAARAAVTLPPPPPPGAIPEVPQGEPSWGDIATDLLESAAEKAVPLAKAWGNAVITLTDSNAGFMDRVSAGASLLFPAGPVLMEFATMVGGRGEIKKEVDFPEAGEDSALCDKENKPPRIAQGSSNVFINNQPAARKGDKLECSAAIVEGSPDVFIGGEQVTYLDIQPEFPPWQRMILGGITIASYLLPPAGLLGKLKNLARLGKLGNLLGKSGKLLGAKLGALLGKTGKSLKSIANKVIRWVTDPVDPVT…
A0A478L4S3_ECOLX	Type IV secretion protein Rhs	BvCmsH19A_02805	Escherichia coli	1610	MSEGPGGPQGATAGGTLAMRMLSQQAMVASQMKRAANDKAIAQMLAAKKSGPPAARQGDEIQHKSFLGALAGAVLGAIVTIAEGCLIMAACATGPYALVLVPALMYASYKASDYVEEKQNQLESWINSFCDTDGAINTGSENVKINGELAARAAVTLPPPPPPGAIPEVPQGEPSWGDIATDLLESAAEKAVPLAKAWGNAVITLTDSNAGFMDRVSAGASLLFPAGPVLMEFATMVGGRGEIKKEVDFPEAGEDSALCDKENKPPRIAQGSSNVFINNQPAARKGDKLECSAAIVEGSPDVFIGGEQVTYLDIQPEFPPWQRMILGGITIASYLLPPAGLLGKLKNLARLGKLGNLLGKSGKLLGAKLGALLGKTGKSLKSIANKVIRWVTDPVDPVT…
A0A4R5K0D4_9PSED	Uncharacterized protein (Fragment)	E1573_00820 E1573_15215	Pseudomonas sp. H9	102	MFEAARFGDDISHTSALGGFLIGAALGIALVATVAIATFTCGFGVALLAGLAAGIGGSLLTAAGEALGSLFSSPSGTITTASPNVFINSRKAARVEKSIGAC
A0A3T6XZ11_ECOLX	Type IV secretion protein Rhs (Fragment)	DMX54_24655	Escherichia coli	541	MSEGPGGPQGATAGGTLAMRMLSQQAMVASQMKRAANDKAIAQMLAAKKSGPPAARLGDEIQHKSFLGALAGAVLGAIVTIAEGCLIMAACATGPYALVLVPALMYASYKASDYVEEKQNQLESWINSFCDTDGAINTGSENVNINGKPAARAAVTLPPPPPPGAIPEIPQGEPSWGDIATDLLESAAEKAVPLAKAWGNAVITLTESNAGFMDRVSAGASLLFPAGPVLMEFATMVGGRGEIKKDVDFPEAGEDTALCDKENKPPRIAQGSSNVFINNQPAARKGDKLECSAAIVEGSPDVFIGGEQVTYLDIQPEFPPWQRMILGGITIASYLLPPAGLLGKLGNLAKLGKLGNLLGKSGKLLGAKLGALLGKTGKSLKSIANKVIRWVTDPVDPVT…
A0A0P9I1G3_PSEA0	YD repeat protein (Fragment)	ALO51_05319	Pseudomonas amygdali	64	MGLPHCFFCYGLAGVGAMFEAARFGDEISHSSALGGFLIGAVLGIALIATVAIATFTCGFGVAL
A0A326SK20_9PSED	Putative Zn-binding protein involved in type VI secretion (Fragment)	C7528_1251	Pseudomonas sp. NP10-3	178	MFEAARFGDEVSHTGALGGFLIGAVLGIALIATVAIATFTCGFGVALLAGLAAGVGGSLLTAAGEAIGSMFSSPSGTIITASPNVYINNRKAAHVEKSIGACDKHPGPVKIAEGSTNVFINSVAAARKGDKLTCGATISGGSDNVFIGGGRYRYLPVDDEIPGWLRTTVDVLMAVAGA
A0A3U2KL94_ECOLX	Type IV secretion protein Rhs (Fragment)	DOY61_22150	Escherichia coli	614	MSEGPGGPQGATAGGTLAMRMLSQQAMVASQMKRAANDKAIAQMLASKKSGPPAARLGDEIQHKSFLGALAGAVLGAIVTIAEGCLIMAACATGPYALVLVPALMYASYKASDYVEEKQNQLESWINSFCDTDGAINTGSENVKINGELAARAAVTLPPPPPPGAIPEVPQGEPSWGDIATDLLESAAEKAVPLAKAWGNAVITLTDSNAGFMDRVSAGASLLFPAGPVLMEFATMVGGRGEIKKEVDFPEAGEDTALCDKENKPPRIAQGSSNVFINNQPAARKGDKLECSAVIVGGSPDVFIGGEQVTYLDIQPEFPPWQRMILGGITIASYLLPPAGLLGKLKNLARLGKLGNLLGKSGKLLGAKLGALLGKTGKSLKSIANKVIRWVTDPVDPVT…
A0A2V2SZG3_9PSED	Type IV secretion protein Rhs (Fragment)	DK254_08930	Pseudomonas sp. RW407	275	MYEAARLHDEIAHSNALTGFLVGAVLGIALVAAATVFFPFTGGLAACLLAGLMTGGAAVMGGWLASLGESVGRLFSSPAGIIETGSPDVFINQRNAAHVARSTAICDKHPPLIQVAEGSSNVFINDVAAARKGDKLTCGATIDGGSSDVFIGGGTVQYLPVDDEVPHWLRATVEVLLVVAGLGRGLVSLARLGLQSGLKAAMPCALRFAAGFAISEAVGRMIIAPVTERVLGGLFGNPVDATTGRKLLTEAGETDFSLPGLMPIQWSRFYASDLD
A0A0P9MZR4_PSESX	YD repeat protein	ALO79_04265	Pseudomonas syringae pv. castaneae	745	MFEAARFGDEISHSSALGGFLIGAVLGIALIATVAIATFTCGFGVALLAGLAAGVGGSLLTAAGEAIGSMFSSPSGTILTASPNVYINNRKAAHVEKSIGACEKHPGPIRIAEGSTNVFINSVAAARKGDKLTCGATISSGSNNVFIGGGRYRYLPVDDEIPGWLRTTVDVLMAVAGAAGGIAQLIKAGTQAGMKAVLPCALKFTAGFVGGEVASRYVVEPVVRSAIGGMAGNPVDTTTGRKLIPDEIDFSLPGLMPIEWSRFYASNLDVDSVLGKGWVLPWEQSLRKHGSFVYLTDNQGRTVPFVDIAPGQRIYNPHEQVYLVCTQGGHYLLQTLDNIFFYFGEVPGDNKPVPLDRIENALGQFLHFTRTEQGTLTDISATGGVRVHLHYDEVTTRLD…
A0A3M5H692_PSESS	YD repeat protein	ALP58_03177	Pseudomonas savastanoi (Pseudomonas syringae pv. savastanoi)	745	MFEAARFGDEISHSSALGGFLIGAVLGIALIATVAIATFTCGFGVALLAGLAAGVGGSLLTAAGEAIGSMFSSPSGTILTASPNVYINNRKAAHVEKSIGACEKHPGPIRIAEGSTNVFINSVAAARKGDKLTCGATISSGSNNVFIGGGRYRYLPVDDEIPGWLRTTVDVLMAVAGAAGGIAQLIKAGTQAGMKAVLPCALKFTAGFVGGEVASRYVVEPVVRSAIGGMAGNPVDTTTGRKLIPDEIDFSLPGLMPIEWSRFYASNLDVDSVLGKGWVLPWEQSLRKHGSFVYLTDNQGRTVPFVDIAPGQRIYNPHEQVYLVCTQGGHYLLQTLDNIFFYFGEVPGDNKPVPLDRIENALGQFLHFTRTEQGTLTDISATGGVRVHLHYDEVTTRLD…
A0A3T8XU51_ECOLX	Type IV secretion protein Rhs (Fragment)	DNC61_25165	Escherichia coli	564	MSEGPGGPQGATAGGTLAMRMLSQQAMVASQMKRAANDKAIAQMLAAKKSGPPAARLGDEIQHKSFLGALAGAVLGAIVTIAEGCLIMAACATGPYALVLVPALMYASYKASDYVEEKQNQLESWINSFCDTDGAINTGSENVNINGKPAARAAVTLPPPPPPGAIPEIPQGEPSWGDIATDLLESAAEKAVPLAKAWGNAVITLTESNAGFMDRVSAGASLLFPAGPVLMEFATMVGGRGEIKKDVDFPEAGEDTALCDKENKPPRIAQGSSNVFINNQPAARKGDKLECSAAIVEGSPDVFIGGEQVTYLDIQPEFPPWQRMILGGITIASYLLPPAGLLGKLGNLAKLGKLGNLLGKSGKLLGAKLGALLGKTGKSLKSIANKVIRWVTDPVDPVT…
A0A234Y662_ECOLX	Rhs core protein with extension	NCTC9055_00501 RX35_02263	Escherichia coli	626	MSEGPGGPQGATAGGTLAMRMLSQQAMVASQMKRAANDKAIAQMLASKKSGPPAARLGDEIQHKSFLGALAGAVLGAIVTIAEGCLIMAACATGPYALVLVPALMYASYKASDYVEEKQNQLESWINSFCDTDGAINTGSENVKINGELAARAAVTLPPPPPPGAIPEVPQGEPSWGDIATDLLESAAEKAVPLAKAWGNAVITLTDSNAGFMDRVSAGASLLFPAGPVLMEFATMVGGRGEIKKEVDFPEAGEDTALCDKENKPPRIAQGSSNVFINNQPAARKGDKLECSAVIVGGSPDVFIGGEQVTYLDIQPEFPPWQRMILGGITIASYLLPPAGLLGKLKNLARLGKLGNLLGKSGKLLGAKLGALLGKTGKSLKSIANKVIRWVTDPVDPVT…
A0A3Y6SRG1_ECOLX	Type IV secretion protein Rhs (Fragment)	D6C28_25860	Escherichia coli	1010	MSEGPGGPQGATAGGTLAMRMLSQQAMVASQMKRAANDKAIAQMLASKKSGPPAARLGDEIQHKSFLGALAGAVLGAIVTIAEGCLIMAACATGPYALVLVPALMYASYKASDYVEEKQNQLESWINSFCDTDGAINTGSENVKINGKPAARAAVTLPPPPPPGAIPEVPQGEPSWGDIATDLLESAAEKAVPLAKAWGNAVITLTDSNAGFMDRVSAGASLLFPAGPVLMEFATMVGGRGEIKKDVDFPEAGEDTALCDKENKPPRIAQGSSNVFINNQPAARQGDKLECSAAIVGGSPDVFIGGEQVTYLDIQPEFPPWQRMILGGITIASYLLPPAGLLGKLKNLARLGKLGNLLGKSGKLLGAKLGALLGKTGKSLKSIANKVIRWVTDPVDPVT…
F3FRM7_PSESX	YD repeat-containing protein (Fragment)	PSYJA_29503	Pseudomonas syringae pv. japonica str. M301072	50	MFEAARFGDEISHTGALGGFLIGAVLGIALIATVAIATFTCGFGVALLAG
A0A3U0EQE5_ECOLX	Type IV secretion protein Rhs	DND05_25315 DNW42_24035	Escherichia coli	1599	MSEGPGGPQGATAGGTLAMRMLSQQAMVASQMKRAANDKAIAQMLAAKKSGPPAARLGDEIQHKSFLGALAGAVLGAIVTIAEGCLIMTACATGPYALVLVPALMYASYKASDYVEEKQNQLESWINSFCDTDGAINTGSENVKINGKPAARAAVTLPPPPPPGAIPEVPQGEPSWGDIATDLLESAAEKAVPLAKAWGNAVITLTDSNAGFMDRVSAGASLLFPAGPVLMEFATMVGGRGEIKKDVDFPEAGEDTALCDKENKPPRIAQGSSNVFINNQPAARKGDKLECSAAIVEGSPDVFIGGEQVTYLDIQPEFPPWQRMILGGITIASYLLPPAGLLGKLGNLAKLGKLGNLLGKSGKLLGAKLGALLSRTKNALKNTYNVLKKFIKDPVDPVT…
A0A3Z8L698_ECOLX	Type IV secretion protein Rhs	D9F43_24200	Escherichia coli	1599	MSEGPGGPQGATAGGTLAMRMLSQQAMVASQMKRAANDKAIAQMLAAKKSGPPAARLGDEIQHKSFLGALAGAVLGAIVTIAEGCLIMTACATGPYALVLVPALMYASYKASDYVEEKQNQLESWINSFCDTDGAINTGSENVKINGKPAARAAVTLPPPPPPGAIPEVPQGEPSWGDIATDLLESAAEKAVPLAKAWGNAVITLTDSNADFMDRVSAGASLLFPAGPVLMEFATMVGGRGEIKKDVDFPEAGEDTALCDKENKPPRIAQGSSNVFINNQPAARKGDKLECSAAIVEGSPDVFIGGEQVTYLDIQPEFPPWQRMILGGITIASYLLPPAGLLGKLGNLAKLGKLGNLLGKSGKLLGAKLGALLSRTKNALKNTYNVLKKFIKDPVDPVT…
A0A3Z1PB04_SALET	RHS repeat protein (Fragment)	DST00_23145	Salmonella enterica I	969	MYEAARVDDPIYHTSALAGFLIGAIIGIAIIAIAAFALFSCGILAGLILGFMADQIASGVLQLGEAIGRSIHHTAGKILTGSENVSTNSRPAARAVLSTVKCDNHIAEKRIAQGSENIYINSQPAARKDDHTECDAVIEDGSPNVFLGGGTQTVLEISSEIPDWLRKVVDVLFVVASLLGGLAGAWRQAAKLGTKFGTKCAAKFIGGELTGMAVSEAISGLFSNPVDVTTGQKILLPETDFTLPGRLPVTCSRFYASHLETVGLLGRGWRLNWETSLREDDEHITLTGVQGRELRYPKTMLTPGHQIFDPEEQLYLSRLHDGRYVLHYTDRSYYVFGDFDSDGMAYLLFMETPHRQRIVFGHEGGRLVRIASSSGHHLLLHRTQTPAGERLSRIELVQG…
A0A3U3TPI8_SALET	RHS repeat protein (Fragment)	D4445_21060 DNV22_21455 DO703_23100 DRY92_21355 DTW09_24070 DUA33_22400 EGU80_22380 EHB49_20815	Salmonella enterica I	969	MYEAARVDDPIYHTSALAGFLIGAIIGIAIIALAAFALFSCGILAGLILGFMADQIASGVLQLGEAIGRSIHHTAGKILTGSENVSTNSRPAARAVLSTVKCDNHIAEKRIAQGSGNIYINSQPAARKDDHTECDAVIEDGSPNVFLGGGTQTVLEISSEIPDWLRKVVDVLFVVASLLGGLAGAWRQAAKLGTKFGTKCAAKFIGGELTGMAVSEAISGLFSNPVDVTTGQKILLPETDFTLPGRLPVTCSRFYASHLETVGLLGRGWRLNWETSLREDDEHITLTGVQGRELRYPKTMLTPGHQIFDPEEQLYLSRLHDGRYVLHYTDRSYYVFGDFDSDGMAYLLFMETPHRQRIVFGHEGGRLVRIASSSGHHLLLHRTQTPAGERLSRIELVQG…
A0A3U3AQ37_SALET	RHS repeat protein (Fragment)	DOQ35_23010	Salmonella enterica I	972	MYEAARVDDPIYHTSALAGFLIGAIIGIAIIALAAFALFSCGILAGLILGFMADQIASGVLQLGEAIGRSIHHTAGKILTGSENVSTNSRPAARAVLSTVKCDNHIAEKRIAQGSGNIYINSQPAARKDDHTECDAVIEDGSPNVFLGGGTQTVLEISSEIPDWLRKVVDVLFVVASLLGGLAGAWRQAAKLGTKFGTKCAAKFIGGELTGMAVSEAISGLFSNPVDVTTGQKILLPETDFTLPGRLPVTCSRFYASHLETVGLLGRGWRLNWETSLREDDEHITLTGVQGRELRYPKTMLTPGHQIFDPEEQLYLSRLHDGRYVLHYTDRSYYVFGDFDSDGMAYLLFMETPHRQRIVFGHEGGRLVRIASSSGHHLLLHRTQTPAGERLSRIELVQG…
A0A3V3FA44_SALER	RHS repeat protein	EA021_21395 EA089_15860	Salmonella enterica (Salmonella choleraesuis)	1359	MYEAARVDDPIFHTSALAGFLIGAIIGIAIIALAAFAFFSCGFLAGLILGFMADQIASGVLQLGEAIGRSIHHTAGKILTGSENVSTNSRPAARAVLSTVKCDNHIAEKRIAQGSENIYINSQPAARKDDHTECDAVIEDGSPNVFLGGGTQTVLEISSEIPDWLRKVVDVLFVVASLLGGLAGAWRQAAKLGTKFGTKCAAKFIGGELVGMAVGEAISGLFSNPVDVTTGQKILLPETDFTLPGRLPVTCSRFYASHLETVGLLGRGWRLNWETSLREDDEHITLTGVQGRELRYPKTMLTPGHQIFDPEEQLYLSRLHDGRYVLHYTDRSYYVFGDFDSDGMAYLLFMETPHRQRIVFGHEGGRLVRIASSSGHHLLLHRTQTPAGERLSRVELVQG…
A0A377ECY8_ECOLX	Rhs core protein	NCTC8960_01098	Escherichia coli	770	MSEGPGGPQGATAGGTLAMRMLSQQAMVASQMKRAANDKAIAQMLAAKKSGPPAARLGDEIQHKSFLGALAGAVLGAIVTIAEGCLIMAACATGPYALVLVPALMYASYKASDYVEEKQNQLESWINSFCDTDGAINTGSENVNINGKPAARAAVTLPPPPPPGAIPEIPQGEPSWGDIATDLLESAAEKAVPLAKAWGNAVITLTESNAGFMDRVSAGASLLFPAGPVLMEFATMVGGRSEIKKDVDFPEAGEDTALCDKENKPPRIAQGSSNVFINNQPAARKGDKLECSAAIVGGSPDVFIGGEQVTYLDIQPEFPPWQRMILGGITIASYLLPPAGLLGKLKNLARLGKLGNLLGKSGKLLGAKLGALLGKTGKSLKSIANKVIRWVTDPVDPVT…
A0A0P9W1U6_PSEYM	RHS family protein (Fragment)	ALO84_100945	Pseudomonas syringae pv. maculicola	646	MFEAARFGDEISHTSALGGFLIGAVLGIALIATVAIATFTCGFGVALLAGLAAGVGGSLLTAAGEAIGSMFSSPSGTILTASPNVFINNRKAAHVEKSIGACEKHPGPIRIAEGSTNVFINSVAAARKGDKLTCGATISSGSNNVFIGGGRYRYLPVDDEIPGWLRTTVDILMAVAGAAGGIAQLLKAGAQAGMKAVMPCALKFTAGFVAGEVASRYVVEPVARSAIGGLTGNPVDTTTGRKLIPDEIDFSLPGLMPIEWSRFYASNLDVNSVLGKGWVLPWEQSLRKLGSFVYLTDNQGRTIPFVDIAPGQRIYNPHEQVYLVCTQGGHYLLQTLDNIFFYFGEVPGNNTPVPLDRIENGLGHFLHFTRTEQGTLTDISATGGVRVHLHYDEVTTRLD…
A0A3M3Z617_PSEYM	Rhs protein with PAAR motif (Fragment)	ALQ34_04210	Pseudomonas syringae pv. maculicola	646	MFEAARFGDEISHTSALGGFLIGAVLGIALIATVAIATFTCGFGVALLAGLAAGVGGSLLTAAGEAIGSMFSSPSGTILTASPNVFINNRKAAHVEKSIGACEKHPGPIRIAEGSTNVFINSVAAARKGDKLTCGATISSGSNNVFIGGGRYRYLPVDDEIPGWLRTTVDILMAVAGAAGGIAQLLKAGAQAGMKAVMPCALKFTAGFVAGEVASRYVVEPVARSAIGGLTGNPVDTTTGRKLIPDEIDFSLPGLMPIEWSRFYASNLDVNSVLGKGWVLPWEQSLRKLGSFVYLTDNQGRTIPFVDIAPGQRIYNPHEQVYLVCTKGGHYLLQTLDNIFFYFGEVPGNNTPVPLDRIENGLGHFLHFTRTEQGTLTDISATGGVRVHLHYDEVTTRLD…
A0A3U9F8M0_SALET	RHS repeat protein (Type IV secretion protein Rhs) (Fragment)	DNI98_21665 DO963_21580 DPF07_21320 DQY76_21530 DRZ34_21345 DSB43_22710 DUR96_24055 EBB85_20765 EFQ06_21590 EGU86_21335	Salmonella enterica I	1026	MYEAARVDDPIYHTSALAGFLIGAIIGIAIIALAAFALFSCGILAGLILGFMADQIASGVLQLGEAIGRSIHHTAGKILTGSENVSTNSRPAARAVLSTVKCDNHIAEKRIAQGSGNIYINSQPAARKDDHTECDAVIEDGSPNVFLGGGTQTVLEISSEIPDWLRKVVDVLFVVASLLGGLAGAWRQAAKLGTKFGTKCAAKFIGGELTGMAVSEAISGLFSNPVDVTTGQKILLPETDFTLPGRLPVTCSRFYASHLETVGLLGRGWRLNWETSLREDDEHITLTGVQGRELRYPKTMLTPGHQIFDPEEQLYLSRLHDGRYVLHYTDRSYYVFGDFDSDGMAYLLFMETPHRQRIVFGHEGGRLVRIASSSGHHLLLHRTQTPAGERLSRIELVQG…
A0A3U0M1G7_SALER	RHS repeat protein (Fragment)	DLZ28_21050	Salmonella enterica (Salmonella choleraesuis)	1050	MYEAARVDDPIYHTSALAGFLIGAIIGIAIIALAAFALFSCGILAGLILGFMADQIASGVLQLGEAIGRSIHHTAGKILTGSENVSTNSRPAARAVLSTVKCDNHIAEKRIAQGSGNIYINSQPAARKDDHTECDAVIEDGSPNVFLGGGTQTVLEISSEIPDWLRKVVDVLFVVASLLGGLAGAWRQAAKLGTKFGTKCAAKFIGGELTGMAVSEAISGLFSNPVDVTTGQKILLPETDFTLPGRLPVTCSRFYASHLETVGLLGRGWRLNWETSLREDDEHITLTGVQGRELRYPKTMLTPGHQIFDPEEQLYLSRLHDGRYVLHYTDRSYYVFGDFDSDGMAYLLFMETPHRQRIVFGHEGGRLVRIASSSGHHLLLHRTQTPAGERLSRIELVQG…
A0A2D2DTP8_9BURK	Uncharacterized protein	CR152_30385	Massilia violaceinigra	1416	MFEAARLTDPIAHTSALAGFLVGALIGIALIAAVAFATFTCGFGVALLAGLAAGVGGSLILGIGEAIGKSIKSPAGAITSGSPNVFTNSLAAAFAKASTVLCDKHSPVPLVAEGSTNVFINGFGAARKDDSTVCGAKIDDGSSNVFIGGGTKEYLPVADEVPPWLRTTVDWAFALAGLAGGLAGLVKAAGGLSRALLPCAAKFIAGYVAGEAVGRYVAAPVISRVMGGLLGNPVEVATGRKVLLAQHEIDAVLQSPIPLVCARFYGSDLAFEGSLGKGWVLPWDLRLQRRDGMIWLTDAQGRETGFPLVQPGHCAYSEAEQCYLACTATGQFILYDLNEVYHDFGLLDAGGDIAWVRRKEDRTGQWHSYTRDDANRVSMIRTSGGQQLQLRYAESPSRL…
A0A3Y6B6U7_ECOLX	Type IV secretion protein Rhs (Fragment)	BMB81_24700	Escherichia coli	600	MSEGPGGPQGATAGGTLAMRMLSQQAMVASQMKRAANDKAIAQMLAAKKSGPPAARLGDEIQHKSFLGALAGAVLGAIVTIAEGCLIMAACATGPYALVLVPALMYASYKASDYVEEKQNQLESWINSFCDTDGAINTGSENVNINGKPAARAAVTLPPPPPPGAIPEIPQGEPSWGDIATDLLESAAEKAVPLAKAWGNAVITLTESNAGFMDRVSAGASLLFPAGPVLMEFATMVGGRGEIKKDVDFPEAGEDTALCDKENKPPRIAQGSSNVFINNQPAARKGDKLECSAAIVEGSPDVFIGGEQVTYLDIQPEFPPWQRMILGGITIASYLLPPAGLLGKLGNLAKLGKLGNLLGKSGKLLGAKLGALLGKTGKSLKSIANKVIRWVTDPVDPVT…
A0A3Y3HJR4_SALET	RHS repeat protein (Fragment)	D8R28_22010	Salmonella enterica I	1080	MYEAARVDDPIYHTSALAGFLIGAIIGIAIIAIAAFALFSCGILAGLILGFMADQIASGVLQLGEAIGRSIHHTAGKILTGSENVSTNSRPAARAVLSTVKCDNHIAEKRIAQGSENIYINSQPAARKDDHTECDAVIEDGSPNVFLGGGTQTVLEISSEIPDWLRKVVDVLFVVASLLGGLAGAWRQAAKLGTKFGTKCAAKFIGGELTGMAVSEAISGLFSNPVDVTTGQKILLPETDFTLPGRLPVTCSRFYASHLETVGLLGRGWRLNWETSLREDDEHITLTGVQGRELRYPKTMLTPGHQIFDPEEQLYLSRLHDGRYVLHYTDRSYYVFGDFDSDGMAYLLFMETPHRQRIVFGHEGGRLVRIASSSGHHLLLHRTQTPAGERLSRIELVQG…
A0A3Y2NFM7_SALET	RHS repeat protein (Fragment)	DTW06_19090	Salmonella enterica I	1082	MYEAARVDDPIYHTSALAGFLIGAIIGIAIIAIAAFALFSCGILAGLILGFMADQIASGVLQLGEAIGRSIHHTAGKILTGSENVSTNSRPAARAVLSTVKCDNHIAEKRIAQGSENIYINSQPAARKDDHTECDAVIEDGSPNVFLGGGTQTVLEISSEIPDWLRKVVDVLFVVASLLGGLAGAWRQAAKLGTKFGTKCAAKFIGGELTGMAVSEAISGLFSNPVDVTTGQKILLPETDFTLPGRLPVTCSRFYASHLETVGLLGRGWRLNWETSLREDDEHITLTGVQGRELRYPKTMLTPGHQIFDPEEQLYLSRLHDGRYVLHYTDRSYYVFGDFDSDGMAYLLFMETPHRQRIVFGHEGGRLVRIASSSGHHLLLHRTQTPAGERLSRIELVQG…
A0A3Y8ZVQ7_SALET	RHS repeat protein (Fragment)	D7O59_22850	Salmonella enterica I	1082	MYEAARVDDPIYHTSALAGFLIGAIIGIAIIAIAAFALFSCGILAGLILGFMADQIASGVLQLGEAIGRSIHHTAGKILTGSENVSTNSRPAARAVLSTVKCDNHIAEKRIAQGSENIYINSQPAARKDDHTECDAVIEDGSPNVFLGGGTQTVLEISSEIPDWLRKVVDVLFVVASLLGGLAGAWRQAAKLGTKFGTKCAAKFIGGELTGMAVSEAISGLFSNPVDVTTGQKILLPETDFTLPGRLPVTCSRFYASHLETVGLLGRGWRLNWETSLREDDEHITLTGVQGRELRYPKTMLTPGHQIFDPEEQLYLSRLHDGRYVLHYTDRSYYVFGDFDSDGMAYLLFMETPHRQRIVFGHEGGRLVRIASSSGHHLLLHRTQTPAGERLSRIELVQG…
A0A1H7DLH0_9PSED	PEP-CTERM protein-sorting domain-containing protein (Fragment)	SAMN03159382_06064 SAMN03159382_06070	Pseudomonas sp. NFACC23-1	111	MDAQAAARLGDEIAHGFGLAAMVAGAVAGALIGAAVVAATVATGGVALAIMAGSIAAGGLSMFQIVKGLSTIFNLPEPTTGALIMGSFNVYINSRNAMRAGEDTSSSCTGL
A0A3U0WJ83_ECOLX	RHS repeat protein	DN623_18770	Escherichia coli	1359	MYEAARVDDPIYHTSALAGFLIGAIIGIAIIAVASFAFFTCGFLAGLILSFLADQIASGVLQLGEAIGRSIHSTVGKILTGSDNVSTNSRPAARAVLSTVICEDHSPEIRIAQGSGNIYINSQPAARKDDHTECDAVIEDGSPNVFLGGGTQTVLEISPEIPDWLRQVVDVLYVVAGMFGGLAGAARQAAKLGTKFGTKCAAKFIGGQLVGMGVSDAVMGLFSNPVDVTTGQKILLPETDFTLPGRLPVTCSRFYASHLETEGLLGRGWRLNWEINLREDETYITFIGVQGRELSYPKAMLTPGHQIFDPEEQFYLSRLHDGRYVLHYTDRSYYVFDEFDDHGVAPLLFLETPYRQRIAFGRENGRLVRVASSSGHHLLLHRTMTPAGERLSHIELVKG…
A0A4D2RAG9_ECOLX	Type IV secretion protein Rhs	BvCmsSINP022_01812	Escherichia coli	1363	MYEAARVDDPIYHTSALAGFLIGAIIGIAIIAVASFAFFTCGFLAGLILSFLADQIASGVLQLGEAIGRSIHSTVGKILTGSDNVSTNSRPAARAVLSTVICEDHSPEIRIAQGSGNIYINSQPAARKDDHTECDAVIEDGSPNVFLGGGTQTVLEISPEIPDWLRQVVDVLYVVAGMLGGLAGAWRQAAKMGSKFGTKCAAKFIGGEMVGMAISDTVMGLFSNPVDVTTGQKILLPETDFTLPGRLPVTCSRFYASHLETEGLLGRGWRLNWEINLREDETYITFIGVQGRELSYPKEMLIPGHQIFDPEEQFYLSRLHDGRYVLHYTDRSYYVFDEFDDHGVAPLLFMETPYRQRIAFGRENGRLVRVASSSGHHLLLHRTMTPAGERLSHIELVKG…
A0A3Z3SGB2_SALET	RHS repeat protein (Fragment)	EF688_21435	Salmonella enterica I	1131	MYEAARVDDPIYHTSALAGFLIGAIIGIAIIALAAFALFSCGILAGLILGFMADQIASGVLQLGEAIGRSIHHTAGKILTGSENVSTNSRPAARAVLSTVKCDNHIAEKRIAQGSGNIYINSQPAARKDDHTECDAVIEDGSPNVFLGGGTQTVLEISSEIPDWLRKVVDVLFVVASLLGGLAGAWRQAAKLGTKFGTKCAAKFIGGELTGMAVSEAISGLFSNPVDVTTGQKILLPETDFTLPGRLPVTCSRFYASHLETVGLLGRGWRLNWETSLREDDEHITLTGVQGRELRYPKTMLTPGHQIFDPEEQLYLSRLHDGRYVLHYTDRSYYVFGDFDSDGMAYLLFMETPHRQRIVFGHEGGRLVRIASSSGHHLLLHRTQTPAGERLSRIELVQG…
A0A3U8S6C5_SALET	RHS repeat protein (Fragment)	DQR07_21545	Salmonella enterica I	1137	MYEAARVDDPIYHTSALAGFLIGAIIGIAIIAIAAFALFSCGILAGLILGFMADQIASGVLQLGEAIGRSIHHTAGKILTGSENVSTNSRPAARAVLSTVKCDNHIAEKRIAQGSENIYINSQPAARKDDHTECDAVIEDGSPNVFLGGGTQTVLEISSEIPDWLRKVVDVLFVVASLLGGLAGAWRQAAKLGTKFGTKCAAKFIGGELTGMAVSEAISGLFSNPVDVTTGQKILLPETDFTLPGRLPVTCSRFYASHLETVGLLGRGWRLNWETSLREDDEHITLTGVQGRELRYPKTMLTPGHQIFDPEEQLYLSRLHDGRYVLHYTDRSYYVFGDFDSDGMAYLLFMETPHRQRIVFGHEGGRLVRIASSSGHHLLLHRTQTPAGERLSRIELVQG…
A0A1B4F128_9BURK	Uncharacterized protein	WS66_16695	Burkholderia sp. LA-2-3-30-S1-D2	1415	MYEAARVTDPIDHTSALAGFLVGAVLGIALIAAVAFATFTCGFGVALLAGMAAGLGAQVLLSLGESIGKMFSSQSGNIMTGSPDVYVNSMSVAYATLSGVACSKHNPVPLVAQGSTNIFINGRPAARKDDKITCGATIADGSHDTFFHGGTQTYLPVDDEVPPWLRTATEWAFVLAGLVGGLGGLLKQAGGLSRAVLPCAAKFIGGYVLGEAVGRYVAGPAINKAIGGLFGNPVDVTSGRKVLLADSETDYVIQSPMPVAIKRFYSSGIEYAGTLGRGWVLPWELRLHARDGRLWYTDAQGRESGFPLLRAGQAAFSEAEQRYLTCTPDGRYILHDLGERYYDFGRYDLDSGRIAWVRRIEDQAGQWYQFERDSRGRVSEILTCGGLQAVLDYEQEHGR…
A0A0D8W446_ECOLX	Type IV secretion protein Rhs	D9I88_12430 EYY34_00600 UC41_26905	Escherichia coli	1620	MSEGPGGPQGATAGGTLAMRMLSQQAMVASQMKRAANDKAIAQMLASKKSGPPAARLGDEIQHKSFLGALAGAVLGAIVTIAEGCLIMAACATGPYALVLVPALMYASYKASDYVEEKQNQLESWINSFCDTDGAINTGSENVNINGKPAARAAVTLPPPPPPGAIPEIPQGEPSWGDIATDLLESAAEKAVPLAKAWGNAVITLTDSNAGFMDRVSAGASLLFPAGPVLMEFATMVGGRGEIKKDVDFPEAGEDTALCDKENKPPRIAQGSSNVFINNQPAACKGDKLECSAAIVEGSPDVFIGGEQVTYLDIQPEFPPWQRMILGGITIASYLLPPAGLLGKLKNLARLGKLGNLLGKSGKLLGAKLGALLGKTGKSLKSIANKVIRWVTDPVDPVT…
A0A447PSB7_SALET	Type IV secretion protein Rhs	wapA NCTC8271_04565	Salmonella enterica I	1176	MYEAARVDDPIYHTSALAGFLIGAIIGIAIIALAAFALFSCGILAGLILGFMADQIASGVLQLGEAIGRSIHHTAGKILTGSENVSTNSRPAARAVLSTVKCDNHIAEKRIAQGSGNIYINSQPAARKDDHTECDAVIEDGSPNVFLGGGTQTVLEISSEIPDWLRKVVDVLFVVASLLGGLAGAWRQAAKLGTKFGTKCAAKFIGGELTGMAVSEAISGLFSNPVDVTTGQKILLPETDFTLPGRLPVTCSRFYASHLETVGLLGRGWRLNWETSLREDDEHITLTGVQGRELRYPKTMLTPGHQIFDPEEQLYLSRLHDGRYVLHYTDRSYYVFGDFDSDGMAYLLFMETPHRQRIVFGHEGGRLVRIASSSGHHLLLHRTQTPAGERLSRIELVQG…
A0A3T9GHZ0_SALET	RHS repeat protein (Type IV secretion protein Rhs) (Fragment)	DNJ32_20315 DNL67_19835 DOH59_21235 DQD72_20760	Salmonella enterica I	905	MYEAARVDDPVYHTSALAGFLIGAIIGIAIIALAAFALFTCGFLAGLVLGFLADQIASGVLQLGEAIGRSIHHTAGKILTGSENVSTNSRPAARAVLSTVKCDNHIAEKRIAQGSENIYINSQPAARKDDHTECDAVIEDGSPDVFLGGGTQTVLEISSEIPDWLRKVVDVLFVVAGLLGGLAGAWRQAAKLGTKFGTKCAAKFIGGELTGMAVSEAISGLFSNPVDVTTGQKILLPETDFTLPGRLPVACSRFYASHLETVGLLGRGWRLNWETSLREDDEHLTLTGVQGRELSYPKTMLTPGHQIFDPEEQLYLSRLHDGRYVLHYTDRSYYVFGDFDSDGMAYLRFMETPHRQRIVFGHEGGRLVRIASSSGHHLLLHRTQTPAGERLSRIELVQG…
A0A3X9IIY5_SALET	RHS repeat protein (Fragment)	DU090_20810	Salmonella enterica I	910	MYEAARVDDPVYHTSALAGFLIGAIIGIAIIALAAFALFTCGFLAGLVLGFLADQIASGVLQLGEAIGRSIHHTAGKILTGSENVSTNSRPAARAVLSTVKCDNHIAEKRIAQGSENIYINSQPAARKDDHTECDAVIEDGSPDVFLGGGTQTVLEISSEIPDWLRKVVDVLFVVAGLLGGLAGAWRQAAKLGTKFGTKCAAKFIGGELTGMAVSEAISGLFSNPVDVTTGQKILLPETDFTLPGRLPVACSRFYASHLETVGLLGRGWRLNWETSLREDDEHLTLTGVQGRELSYPKTMLTPGHQIFDPEEQLYLSRLHDGRYVLHYTDRSYYVFGDFDSDGMAYLRFMETPHRQRIVFGHEGGRLVRIASSSGHHLLLHRTQTPAGERLSRIELVQG…
A0A376ZZZ1_ECOLX	Rhs core protein with extension	NCTC9703_03002	Escherichia coli	602	MSEGPGGPQGATAGGTLAMRMLSQQAMVASQMKRAANDKAIAQMLAAKKSGPPAARLGDEIQHKSFLGALAGAVLGAIVTIAEGCLIMAACATGPYALVLVPALMYASYKASDYVEEKQNQLESWINSFCDTDGAINTGSENVNINGKPAARAAVTLPPPPPPGAIPEIPQGEPSWGDIATDLLESAAEKAVPLAKAWGNAVITLTESNAGFMDRVSAGASLLFPAGPVLMEFATMVGGRGEIKKEVDFPEAGEDTALCDKENKPPRIAQGSSNVFINNQPAARKGDKLECSAAIVEGSPDVFIGGEQVTYLDIQPEFPPWQRMILGGITIASYLLPPAGLLGKLGNLAKLGKLGNLLGKSGKLLGAKLGALLGKTGKSLKSIANKVIRWVTDPVDPVT…
A0A0S4NVJ1_9BURK	Rhs-family protein	BN3177_3287	Janthinobacterium sp. CG23_2	1416	MFEAARLTDPIAHSSALAGFLVGALIGIALIAAVAFATFTCGFGVALLAGLAAGVGASLILGIGEAIGKSFMSPAGTITSGSPTVFTNSRPAAFAKASTVLCDKHSPVPLVAEGSTNVFINGFAAARKKDHTTCGAEIDDGSSNVFIGGGTKAYLPVADEVPPWLRTTVDWAFALAGLAGGLGGMLKAAGGLSRAVLPCAAKFIAGYVAGEAVGRYVAAPIISRVMGGLLGNPVEVATGRKVLLAQHEIDAVVQSPIPLVCSRFYASDLAFEGSLGKGWVLPWDLRLQQRDGRIWFADGQGRETGFPLVQPGHCAYSDAEQCYLACTATGQFILYDLNEVYHDFGQLDPGGAIAWVRRREDRTGQWHSYLRDDAGRVSMIRTSGGQQLQLHYADAPSRL…
A0A3X9QC32_SALET	RHS repeat protein (Fragment)	D6P24_22430	Salmonella enterica I	943	MYEAARVDDPVYHTSALAGFLIGAIIGIAIIALAAFALFTCGFLAGLVLGFLADQIASGVLQLGEAIGRSIHHTAGKILTGSENVSTNSRPAARAVLSTVKCDNHIAEKRIAQGSENIYINSQPAARKDDHTECDAVIEDGSPDVFLGGGTQTVLEISSEIPDWLRKVVDVLFVVAGLLGGLAGAWRQAAKLGTKFGTKCAAKFIGGELTGMAVSEAISGLFSNPVDVTTGQKILLPETDFTLPGRLPVACSRFYASHLETVGLLGRGWRLNWETSLREDDEHLTLTGVQGRELRYPKTMLTPGHQIFDPEEQLYLSRLHDGRYVLHYTDRSYYVFGDFDSDGMAYLRFMETPHRQRIVFGHEGGRLVRIASSSGHHLLLHRTQTPAGERLSRIELVQG…
A0A3Z6PYA0_SALET	RHS repeat protein (Fragment)	DUQ83_19390	Salmonella enterica I	949	MYEAARVDDPVYHTSALAGFLIGAIIGIAIIALAAFALFTCGFLAGLVLGFLADQIASGVLQLGEAIGRSIHHTAGKILTGSENVSTNSRPAARAVLSTVKCDNHIAEKRIAQGSENIYINSQPAARKDDHTECDAVIEDGSPDVFLGGGTQTVLEISSEIPDWLRKVVDVLFVVASLLGGLAGAWRQAAKLGTKFGTKCAAKFIGGELVGMAVGEAISGLFSNPVDVTTGQKILLPETDFTLPGRLPVACSRFYASHLETVGLLGRGWRLNWETSLREDDEHLTLTGVQGRELSYPKTMLTPGHQIFDPEEQLYLSRLHDGRYVLHYTDRSYYVFGDFDSDGMAYLLFMETPHRQRIVFGHEGGRLVRIASSSGHHLLLHRTQTPAGERLSRIELVQG…
A0A376ZPC3_ECOLX	Rhs core protein with extension	NCTC8179_01870	Escherichia coli	642	MSEGPGGPQGATAGGTLAMRMLSQQAMVASQMKRAANDKAIAQMLAAKKSGPPAARLGDEIQHKSFLGALAGAVLGAIVTIAEGCLIMAACATGPYALVLVPALMYASYKASDYVEEKQNQLESWINSFCDTDGAINTGSENVNINGKPAARAAVTLPPPPPPGAIPEIPQGEPSWGDIATDLLESAAEKAVPLAKAWGNAVITLTESNAGFMDRVSAGASLLFPAGPVLMEFATMVGGRGEIKKEVDFPEAGEDTALCDKENKPPRIAQGSSNVFINNQPAARKGDKLECSAAIVEGSPDVFIGGEQVTYLDIQPEFPPWQRMILGGITIASYLLPPAGLLGKLGNLAKLGKLGNLLGKSGKLLGAKLGALLGKTGKSLKSIANKVIRWVTDPVDPVT…
A0A0K3S7Z2_ECOLX	Rhs core protein with extension (Type IV secretion protein Rhs)	BvCmsNSP006_01973 ERS085379_05624 NCTC9111_03768 SAMEA3472055_05503	Escherichia coli	640	MSEGPGGPQGATAGGTLAMRMLSQQAMVASQMKRAANDKAIAQMLAAKKSGPPAARLGDEIQHKSFLGALAGAVLGAIVTIAEGCLIMAACATGPYALVLVPALMYASYKASDYVEEKQNQLESWINSFCDTDGAINTGSENVNINGKPAARAAVTLPPPPPPGAIPEIPQGEPSWGDIATDLLESAAEKAVPLAKAWGNAVITLTESNAGFMDRVSAGASLLFPAGPVLMEFATMVGGRGEIKKEVDFPEAGEDTALCDKENKPPRIAQGSSNVFINNQPAARKGDKLECSAAIVEGSPDVFIGGEQVTYLDIQPEFPPWQRMILGGITIASYLLPPAGLLGKLGNLAKLGKLGNLLGKSGKLLGAKLGALLGKTGKSLKSIANKVIRWVTDPVDPVT…
I2WRZ8_ECOLX	Uncharacterized protein	EC40967_0627	Escherichia coli 4.0967	640	MSEGPGGPQGATAGGTLAMRMLSQQAMVASQMKRAANDKAIAQMLAAKKSGPPAARLGDEIQHKSFLGALAGAVLGAIVTIAEGCLIMAACATGPYALVLVPALMYASYKASDYVEEKQNQLESWINSFCDTDGAINTGSENVNINGKPAARAAVTLPPPPPPGAIPEIPQGEPSWGDIATDLLESAAEKAVPLAKAWGNAVITLTESNAGFMDRVSAGASLLFPAGPVLMEFATMVGGRGEIKKEVDFPEAGEDTALCDKENKPPRIAQGSSNVFINNQPAARKGDKLECSAAIVEGSPDVFIGGEQVTYLDIQPEFPPWQRMILGGITIASYLLPPAGLLGKLGNLAKLGKLGNLLGKSGKLLGAKLGALLGKTGKSLKSIANKVIRWVTDPVDPVT…
A0A5E8HMG3_ECOLX	Type IV secretion protein Rhs	BvCms28BK_01652	Escherichia coli	640	MSEGPGGPQGATAGGTLAMRMLSQQAMVASQMKRAANDKAIAQMLAAKKSGPPAARLGDEIQHKSFLGALAGAVLGAIVTIAEGCLIMAACATGPYALVLVPALMYASYKASDYVEEKQNQLESWINSFCDTDGAINTGSENVNINGKPAARAAVTLPPPPPPGAIPEIPQGEPSWGDIATDLLESAAEKAVPLAKAWGNAVITLTESNAGFMDRVSAGASLLFPAGPVLMEFATMVGGRGEIKKEVDFPEAGEDTALCDKENKPPRIAQGSSNVFINNQPAARKGDKLECSAAIVEGSPDVFIGGEQVTYLDIQPEFPPWQRMILGGITIASYLLPPAGLLGKLGNLAKLGKLGNLLGKSGKLLGAKLGALLGKTGKSLKSIANKVIRWVTDPVDPVT…
B3Y086_ECO11	Rhs core protein with extension		Escherichia coli O111:H-	640	MSEGPGGPQGATAGGTLAMRMLSQQAMVASQMKRAANDKAIAQMLAAKKSGPPAARLGDEIQHKSFLGALAGAVLGAIVTIAEGCLIMAACATGPYALVLVPALMYASYKASDYVEEKQNQLESWINSFCDTDGAINTGSENVNINGKPAARAAVTLPPPPPPGAIPEIPQGEPSWGDIATDLLESAAEKAVPLAKAWGNAVITLTESNAGFMDRVSAGASLLFPAGPVLMEFATMVGGRGEIKKEVDFPEAGEDTALCDKENKPPRIAQGSSNVFINNQPAARKGDKLECSAAIVEGSPDVFIGGEQVTYLDIQPEFPPWQRMILGGITIASYLLPPAGLLGKLGNLAKLGKLGNLLGKSGKLLGAKLGALLGKTGKSLKSIANKVIRWVTDPVDPVT…
A0A0D5IXB7_9BURK	RHS repeat-associated core domain protein	AK34_5373	Burkholderia dolosa AU0158	1412	MYEAARVTDPIEHTSALTGFLVGAVLGIALIATVAFVTFSCGFGAALLAGMAAGIGAQGLLSLGEAIGRMSSAPSGNIVTGSSDVYVNGKPAAYATLSGVACSKHNPIPLVAQGSTNIFINGRPAARKGDKITCGATIGDGSHDTFFHGGTQTYLPVADEVPPWLRTATDWAFALAGLVGGLGGLLRQAGGLSRAVLPCAAKFIGGYVLGEAVGRYVAGPAINKAIGGLFGNPVDVTTGRKVLLADSEIDYVIPSPMPVAIKRFYSSSLEYAGTLGRGWVLPWELRLHARDGRLRYTDAQGRETGFPLLRAGQAAYSEAEQRYLSCTPDGRYILHDIGETYYDFGRYEPDSGRVAWVRRIEDQAGQWCQFERDSRGRVSEILTCGGLQAVLDYESGHGR…
A0A2R7YN37_9BURK	Uncharacterized protein	DB771_08995	Burkholderia sp. AU29985	1412	MYEAARVTDPIEHTSALTGFLVGAVLGIALIATVAFVTFSCGFGAALLAGMAAGIGAQGLLSLGEAIGRMSSAPSGNIVTGSSDVYVNGKPAAYATLSGVACSKHNPIPLVAQGSTNIFINGRPAARKGDKITCGATIGDGSHDTFFHGGTQTYLPVADEVPPWLRTATDWAFALAGLVGGLGGLLRQAGGLSRAVLPCAAKFIGGYVLGEAVGRYVAGPAINKAIGGLFGNPVDVTTGRKVLLADSEIDYVIPSPMPVAIKRFYSSSLEYAGTLGRGWVLPWELRLHARDGRLRYTDAQGRETGFPLLRAGQAAYSEAEQRYLSCTPDGRYILHDIGETYYDFGRYEPDSGRVAWVRRIEDQAGQWCQFERDSRGRVSEILTCGGLQAVLDYESGHGR…
A0A2N3PGL3_9PSED	Type IV secretion protein Rhs (Fragment)	CX511_01000	Pseudomonas sp. S06B 330	144	MFEAARFGDDISHTSALGGFLIGAALGIALIATVAIATFTCGFGVALLAGLAAGIGGSLLTAAGEAIGSMFSSPSGTIATASPNVFVNSRKAARVEKSMGACDKHPGPVQIAEGSTNVFINSVAAARKGDKLTCGATISGGSDN
A0A3Y8I332_ECOLX	Type IV secretion protein Rhs (Fragment)	DTZ06_24855	Escherichia coli	881	MSEGPGGPQGATAGGTLAMRMLSQQAMVASQMKRAANDKAIAQMLASKKSGPPAARLGDEIQHKSFLGALAGAVLGAIVTIAEGCLIMAACATGPYALVLVPALMYASYKASDYVEEKQNQLESWINSFCDTDGAINTGSENVKINGKPAARAAVTLPPPPPPGAIPEVPQGEPSWGDIATDLLESAAEKAVPLAKAWGNAVITLTDSNAGFMDRVSAGASLLFPAGPVLMEFATMVGGRGEIKKDVDFPEAGEDTALCDKENKPPRIAQGSSNVFINNQPAARQGDKLECSAAIVGGSPDVFIGGEQVTYLDIQPEFPPWQRMILGGITIASYLLPPAGLLGKLKNLARLGKLGNLLGKSGKLLGAKLGALLGKTGKSLKSIANKVIRWVTDPVDPVT…
A0A3Z9DR46_ECOLX	Type IV secretion protein Rhs (Fragment)	D9D95_25905	Escherichia coli	885	MSEGPGGPQGATAGGTLAMRMLSQQAMVASQMKRAANDKAIAQMLASKKSGPPAARLGDEIQHKSFLGALAGAVLGAIVTIAEGCLIMAACATGPYALVLVPALMYASYKASDYVEEKQNQLESWINSFCDTDGAINTGSENVKINGKPAARAAVTLPPPPPPGAIPEVPQGEPSWGDIATDLLESAAEKAVPLAKAWGNAVITLTDSNAGFMDRVSAGASLLFPAGPVLMEFATMVGGRGEIKKDVDFPEAGEDTALCDKENKPPRIAQGSSNVFINNQPAARQGDKLECSAAIVGGSPDVFIGGEQVTYLDIQPEFPPWQRMILGGITIASYLLPPAGLLGKLKNLARLGKLGNLLGKSGKLLGAKLGALLGKTGKSLKSIANKVIRWVTDPVDPVT…
A0A3T6V9M5_ECOLX	Type IV secretion protein Rhs (Fragment)	DMY96_26970	Escherichia coli	888	MSEGPGGPQGATAGGTLAMRMLSQQAMVASQMKRAANDKAIAQMLASKKSGPPAARLGDEIQHKSFLGALAGAVLGAIVTIAEGCLIMAACATGPYALVLVPALMYASYKASDYVEEKQNQLESWINSFCDTDGAINTGSENVKINGKPAARAAVTLPPPPPPGAIPEVPQGEPSWGDIATDLLESAAEKAVPLAKAWGNAVITLTDSNAGFMDRVSAGASLLFPAGPVLMEFATMVGGRGEIKKDVDFPEAGEDTALCDKENKPPRIAQGSSNVFINNQPAARQGDKLECSAAIVGGSPDVFIGGEQVTYLDIQPEFPPWQRMILGGITIASYLLPPAGLLGKLKNLARLGKLGNLLGKSGKLLGAKLGALLGKTGKSLKSIANKVIRWVTDPVDPVT…
A0A3V9RUA3_SALET	RHS repeat protein	AHZ72_18670 D5861_20425	Salmonella enterica I	1352	MYEAARVDDPIYHTSALAGFLIGAIIGIAIIALAAFALFSCGILAGLILGFMADQIASGVLQLGEAIGRSIHHTAGKILTGSENVSTNSRPAARAVLSTVKCDNHIAEKRIAQGSGNIYINSQPAARKDDHTECDAVIEDGSPNVFLGGGTQTVLEISSEIPDWLRKVVDVLFVVASLLGGLAGAWRQAAKLGTKFGTKCAAKFIGGELTGMAVSEAISGLFSNPVDVTTGQKILLPETDFTLPGRLPVTCSRFYASHLETVGLLGRGWRLNWETSLREDDEHITLTGVQGRELRYPKTMLTPGHQIFDPEEQLYLSRLHDGRYVLHYTDRSYYVFGDFDSDGMAYLLFMETPHRQRIVFGHEGGRLERIASSSGHHLLLHRTQTPAGERLSRIELVQG…
A0A3V7DAY4_SALET	RHS repeat protein	CVC07_02995 E4904_13595 EHO10_06820 EHO12_15280 EHO13_05740 EHO21_06735	Salmonella enterica subsp. enterica serovar Cerro	1352	MYEAARVDDPIYHTSALAGFLIGAIIGIAIIALAAFALFSCGILAGLILGFMADQIASGVLQLGEAIGRSIHHTAGKILTGSENVSTNSRPAARAVLSTVKCDNHIAEKRIAQGSGNIYINSQPAARKDDHTECDAVIEDGSPNVFLGGGTQTVLEISSEIPDWLRKVVDVLFVVASLLGGLAGAWRQAAKLGTKFGTKCAAKFIGGELTGMAVSEAISGLFSNPVDVTTGQKILLPETDFTLPGRLPVTCSRFYASHLETVGLLGRGWRLNWETSLREDDEHITLTGVQGRELRYPKTMLTPGHQIFDPEEQLYLSRLHDGRYVLHYTDRSYYVFGDFDSDGMAYLLFMETPHRQRIVFGHEGGRLERIASSSGHHLLLHRTQTPAGERLSRIELVQG…
A0A3Z1B923_SALET	RHS repeat protein	AAL03_11855	Salmonella enterica I	1359	MYEAARVDDPIYHTSALAGFLIGAIIGIAIIAIAAFALFSCGILAGLILGFMADQIASGVLQLGEAIGRSIHHTAGKILTGSENVSTNSRPAARAVLSTVKCDNHIAEKRIAQGSENIYINSQPAARKDDHTECDAVIEDGSPNVFLGGGTQTVLEISSEIPDWLRKVVDVLFVVASLLGGLAGAWRQAAKLGTKFGTKCAAKFIGGELTGMAVSEAISGLFSNPVDVTTGQKILLPETDFTLPGRLPVTCSRFYASHLETVGLLGRGWRLNWETSLREDDEHITLTGVQGRELRYPKTMLTPGHQIFDPEEQLYLSRLHDGRYVLHYTDRSYYVFGDFDSDGMAYLLFMETPHRQRIVFGHEGGRLVRIASSSGHHLLLHRTQTPAGERLSRIELVQG…
A0A3V8GLH0_SALER	RHS repeat protein (Type IV secretion protein Rhs)	DKM84_17915 DXI78_22290 EGC65_15195	Salmonella enterica (Salmonella choleraesuis)	1362	MYEAARVDDPIYHTSALAGFLIGAIIGIAIIAIAAFALFSCGILAGLILGFMADQIASGVLQLGEAIGRSIHHTAGKILTGSENVSTNSRPAARAVLSTVKCDNHIAEKRIAQGSENIYINSQPAARKDDHTECDAVIEDGSPNVFLGGGTQTVLEISSEIPDWLRKVVDVLFVVASLLGGLAGAWRQAAKLGTKFGTKCAAKFIGGELTGMAVSEAISGLFSNPVDVTTGQKILLPETDFTLPGRLPVTCSRFYASHLETVGLLGRGWRLNWETSLREDDEHITLTGVQGRELRYPKTMLTPGHQIFDPEEQLYLSRLHDGRYVLHYTDRSYYVFGDFDSDGMAYLLFMETPHRQRIVFGHEGGRLVRIASSSGHHLLLHRTQTPAGERLSRIELVQG…
A0A3U6VZ48_SALET	RHS repeat protein	DPZ91_16990 EIW76_12005	Salmonella enterica I	1362	MYEAARVDDPIYHTSALAGFLIGAIIGIAIIAIAAFALFSCGILAGLILGFMADQIASGVLQLGEAIGRSIHHTAGKILTGSENVSTNSRPAARAVLSTVKCDNHIAEKRIAQGSENIYINSQPAARKDDHTECDAVIEDGSPNVFLGGGTQTVLEISSEIPDWLRKVVDVLFVVASLLGGLAGAWRQAAKLGTKFGTKCAAKFIGGELTGMAVSEAISGLFSNPVDVTTGQKILLPETDFTLPGRLPVTCSRFYASHLETVGLLGRGWRLNWETSLREDDEHITLTGVQGRELRYPKTMLTPGHQIFDPEEQLYLSRLHDGRYVLHYTDRSYYVFGDFDSDGMAYLLFMETPHRQRIVFGHEGGRLVRIASSSGHHLLLHRTQTPAGERLSRIELVQG…
A0A3U7ZP04_SALET	RHS repeat protein	DQE67_16140 E0X59_15645	Salmonella enterica subsp. enterica serovar Bredeney	1366	MYEAARVDDPIYHTSALAGFLIGAIIGIAIIAIAAFALFSCGILAGLILGFMADQIASGVLQLGEAIGRSIHHTAGKILTGSENVSTNSRPAARAVLSTVKCDNHIAEKRIAQGSENIYINSQPAARKDDHTECDAVIEDGSPNVFLGGGTQTVLEISSEIPDWLRKVVDVLFVVASLLGGLAGAWRQAAKLGTKFGTKCAAKFIGGELAGMAVGEAISGLFSNPVDVTTGQKILLPETDFTLPGRLPVTCSRFYASHLETVGLLGRGWRLNWETSLREDDEHITLTGVQGRELCYPKTMLTPGHQIFDPEEQLYLSRLHDGRYVLHYTDRSYYVFGDFDSDGMAYLLFMETPHRQRIVFGHEGGRLVRIASSSGHHLLLHRTQTPAGERLSRIELVQG…
A0A3Z4AMG5_SALET	RHS repeat protein	D4Y61_12235 D6R14_10350	Salmonella enterica I	1366	MYEAARVDDPIYHTSALAGFLIGAIIGIAIIAIAAFALFSCGILAGLILGFMADQIASGVLLLGEAIGRSIHHTAGKILTGSENVSTNSRPAARAVLSTVKCDNHIAEKRIAQGSENIYINSQPAARKDDHTECDAVIEDGSPNVFLGGGTQTVLEISSEIPDWLRKVVDVLFVVASLLGGLAGAWRQAAKLGTKFGTKCAAKFIGGELTGMAVSEAISGLFSNPVDVTTGQKILLPETDFTLPGRLPVTCSRFYASHLETVGLLGRGWRLNWETSLREDDEHITLTGVQGRELRYPKTMLTPGHQIFDPEEQLYLSRLHDGRYVLHYTDRSYYVFGDFDSDGMAYLLFMETPHRQRIVFGHEGGRLVRIASSSGHHLLLHRTQTPAGERLSRIELVQG…
A0A3Y9PE72_SALET	RHS repeat protein	D5905_20535 DUQ37_10910	Salmonella enterica I	1374	MYEAARVDDPIYHTSALAGFLIGAIIGIAIIAIAAFALFSCGILAGLILGFMADQIASGVLQLGEAIGRSIHHTAGKILTGSENVSTNSRPAARAVLSTVKCDNHIAEKRIAQGSENIYINSQPAARKDDHTECDAVIEDGSPNVFLGGGTQTVLEISSEIPDWLRKVVDVLFVVASLLGGLAGAWRQAAKLGTKFGTKCAAKFIGGELTGMAVSEAISGLFSNPVDVTTGQKILLPETDFTLPGRLPVTCSRFYASHLETVGLLGRGWRLNWETSLREDDEHITLTGVQGRELRYPKTMLTPGHQIFDPEEQLYLSRLHDGRYVLHYTDRSYYVFGDFDSDGMAYLLFMETPHRQRIVFGHEGGRLVRIASSSGHHLLLHRTQTPAGERLSRIELVQG…
A0A3W0IZL9_SALER	RHS repeat protein	DXV83_18070	Salmonella enterica (Salmonella choleraesuis)	1374	MYEAARVDDPIYHTSALAGFLIGAIIGIAIIAIAAFALFSCGILAGLILGFMADQIASGVLQLGEAIGRSIHHTAGKILTGSENVSTNSRPAARAVLSTVKCDNHIAEKRIAQGSENIYINSQPAARKDDHTECDAVIEDGSPNVFLGGGTQTVLEISSEIPDWLRKVVDVLFVVASLLGGLAGAWRQAAKLGTKFGTKCAAKFIGGELTGMAVSEAISGLFSNPVDVTTGQKILLPETDFTLPGRLPVTCSRFYASHLETVGLLGRGWRLNWETSLREDDEHITLTGVQGRELRYPKTMLTPGHQIFDPEEQLYLSRLHDGRYVLHYTDRSYYVFGDFDSDGMAYLLFMETPHRQRIVFGHEGGRLVRIASSSGHHLLLHRTQTPAGERLSRIELVQG…
A0A3V8XN53_SALMO	RHS repeat protein	AXU21_19760 AXU38_17895 E4933_14920	Salmonella montevideo	1374	MYEAARVDDPIYHTSALAGFLIGAIIGIAIIAIAAFALFSCGILAGLILGFMADQIASGVLQLGEAIGRSIHHTAGKILTGSENVSTNSRPAARAVLSTVKCDNHIAEKRIAQGSENIYINSQPAARKDDHTECDAVIEDGSPNVFLGGGTQTVLEISSEIPDWLRKVVDVLFVVASLLGGLAGAWRQAAKLGTKFGTKCAAKFIGGELTGMAVSEAISGLFSNPVDVTTGQKILLPETDFTLPGRLPVTCSRFYASHLETVGLLGRGWRLNWETSLREDDEHITLTGVQGRELRYPKTMLTPGHQIFDPEEQLYLSRLHDGRYVLHYTDRSYYVFGDFDSDGMAYLLFMETPHRQRIVFGHEGGRLVRIASSSGHHLLLHRTQTPAGERLSRIELVQG…
A0A3Z8LTJ5_SALER	RHS repeat protein	D6A03_20210	Salmonella enterica (Salmonella choleraesuis)	1374	MYEAARVDDPIYHTSALAGFLIGAIIGIAIIAIAAFALFSCGILAGLILGFMADQIASGVLQLGEAIGRSIHHTAGKILTGSENVSTNSRPAARAVLSTVKCDNHIAEKRIAQGSENIYINSQPAARKDDHTECDAVIEDGSPNVFLGGGTQTVLEISSEIPDWLRKVVDVLFVVASLLGGLAGAWRQAAKLGTKFGTKCAAKFIGGELTGMAVSEAISGLFSNPVDVTTGQKILLPETDFTLPGRLPVTCSRFYASHLETVGLLGRGWRLNWETSLREDDEHITLTGVQGRELRYPKTMLTPGHQIFDPEEQLYLSRLHDGRYVLHYTDRSYYVFGDFDSDGMAYLLFMETPHRQRIVFGHEGGRLVRIASSSGHHLLLHRTQTPAGERLSRIELVQG…
A0A3V6PRU8_SALET	RHS repeat protein	ADQ53_20155	Salmonella enterica I	1377	MYEAARVDDPIYHTSALAGFLIGAIIGIAIIAIAAFALFSCGILAGLILGFMADQIASGVLQLGEAIGRSIHHTAGKILTGSENVSTNSRPAARAVLSTVKCDNHIAEKRIAQGSGNIYINSQPAARKDDHTECDAVIEDGSPNVFLGGGTQTVLEISSEIPDWLRKVVDVLFVVASLLGGLAGAWRQAAKLGTKFGTKCAAKFIGGELTGMAVSEAISGLFSNPVDVTTGQKILLPETDFTLPGRLPVTCSRFYASHLETVGLLGRGWRLNWETSLREDDEHITLTGVQGRELRYPKTMLTPGHQIFDPKEQLYLSRLHDGRYVLHYTDRSYYVFGDFDSDGMAYLLFMETPHRQRIVFGHEGGRLVRIASSSGHHLLLHRTQTPAGERLSRIELVQG…
A0A3U2TWL5_SALET	RHS repeat protein	DOH53_20735	Salmonella enterica I	1377	MYEAARVDDPIYHTSALAGFLIGAIIGIAIIAIAAFALFSCGILAGLILGFMADQIASGVLQLGEAIGRSIHHTAGKILTGSENVSTNSRPAARAVLSTVKCDNHIAEKRIAQGSGNIYINSQPAARKDDHTECDAVIEDGSPNVFLGGGTQTVLEISSEIPDWLRKVVDVLFVVASLLGGLAGAWRQAAKLGTKFGTKCAAKFIGGELTGMAVSEAISGLFSNPVDVTTGQKILLPETDFTLPGRLPVTCSRFYASHLETVGLLGRGWRLNWETSLREDDEHITLTGVQGRELRYPKTMLTPGHQIFDPEEQLYLSRLHDGRYVLHYTDRSYYVFGDFDSDGMAYLLFMETPHRQRIVFGHEGGRLVRIASSSGHHLLLHRTQTPAGERLSRIELVQG…
A0A3V7TDW2_SALER	RHS repeat protein	CIU45_22840	Salmonella enterica (Salmonella choleraesuis)	1381	MYEAARVDDPIYHTSALAGFLIGAIIGIAIIAIAAFALFSCGILAGLILGFMADQIASGVLQLGEAIGRSIHHTAGKILTGSENVSTNSRPAARAVLSTVKCDNHIAEKRIAQGSENIYINSQPAARKDDHTECDAVIEDGSPNVFLGGGTQTVLEISSEIPDWLRKVVDVLFVVASLLGGLAGAWRQAAKLGTKFGTKCAAKFIGGELTGMAVSEAISGLFSNPVDVTTGQKILLPETDFTLPGRLPVTCSRFYASHLETVGLLGRGWRLNWENSLREDDEHITLTGVQGRELRYPKTMLTPGHQIFDPEEQLYLSRLHDGRYVLHCTDRSYYVFGDFDSDGMAYLLFMETPHRQRIVFGHEGGRLVRIASSSGHHLLLHRTQTPAGERLSRIELVQG…
A0A3Q9LBN5_SALET	RHS repeat protein	ELZ75_17505 ELZ95_17470 ELZ96_17505	Salmonella enterica subsp. enterica serovar Moero	1377	MYEAARVDDPIYHTSALAGFLIGAIIGIAIIALAAFALFSCGILAGLILGFMADQIASGVLQLGEAIGRSIHHTAGKILTGSENVSTNSRPAARAVLSTVKCDNHIAEKRIAQGSGNIYINSQPAARKDDHTECDAVIEDGSPNVFLGGGTQTVLEISSEIPDWLRKVVDVLFVVASLLGGLAGAWRQAAKLGTKFGTKCAAKFIGGELTGMAVSEAISGLFSNPVDVTTGQKILLPETDFTLPGRLPVTCSRFYASHLETVGLLGRGWRLNWETSLREDDEHITLTGVQGRELRYPKTMLTPGHQIFDPEEQLYLSRLHDGRYVLHYTDRSYYVFGDFDSDGMAYLLFMETPHRQRIVFGHEGGRLVRIASSSGHHLLLHRTQTPAGERLSRIELVQG…
A0A377FD89_ECOLX	Rhs core protein	NCTC9706_00957	Escherichia coli	705	MSEGPGGPQGATAGGTLAMRMLSQQAMVASQMKRAANDKAIAQMLAAKKSGPPAARLGDEIQHKSFLGALAGAVLGAIVTIAEGCLIMAACATGPYALVLVPALMYASYKASDYVEEKQNQLESWINSFCDTDGAINTGSENVNINGKPAARAAVTLPPPPPPGAIPEIPQGEPSWGDIATDLLESAAEKAVPLAKAWGNAVITLTESNAGFMDRVSAGASLLFPAGPVLMEFATMVGGRGEIKKDVDFPEAGEDTALCDKENKPPRIAQGSSNVFINNQPAARKGDKLECSAAIVEGSPDVFIGGEQVTYLDIQPEFPPWQRMILGGITIASYLLPPAGLLGKLGNLAKLGKLGNLLGKSGKLLGAKLGALLGKTGKSLKSIANKVIRWVTDPVDPVT…
V0AEU2_ECOLX	Uncharacterized protein	HMPREF1620_01338	Escherichia coli 909945-2	705	MSEGPGGPQGATAGGTLAMRMLSQQAMVASQMKRAANDKAIAQMLAAKKSGPPAARLGDEIQHKSFLGALAGAVLGAIVTIAEGCLIMAACATGPYALVLVPALMYASYKASDYVEEKQNQLESWINSFCDTDGAINTGSENVNINGKPAARAAVTLPPPPPPGAIPEIPQGEPSWGDIATDLLESAAEKAVPLAKAWGNAVITLTESNAGFMDRVSAGASLLFPAGPVLMEFATMVGGRGEIKKDVDFPEAGEDTALCDKENKPPRIAQGSSNVFINNQPAARKGDKLECSAAIVEGSPDVFIGGEQVTYLDIQPEFPPWQRMILGGITIASYLLPPAGLLGKLGNLAKLGKLGNLLGKSGKLLGAKLGALLGKTGKSLKSIANKVIRWVTDPVDPVT…
S1EUQ8_ECOLX	YD repeat (Two copies)	A1UI_00625	Escherichia coli KTE73	705	MSEGPGGPQGATAGGTLAMRMLSQQAMVASQMKRAANDKAIAQMLAAKKSGPPAARLGDEIQHKSFLGALAGAVLGAIVTIAEGCLIMAACATGPYALVLVPALMYASYKASDYVEEKQNQLESWINSFCDTDGAINTGSENVNINGKPAARAAVTLPPPPPPGAIPEIPQGEPSWGDIATDLLESAAEKAVPLAKAWGNAVITLTESNAGFMDRVSAGASLLFPAGPVLMEFATMVGGRGEIKKDVDFPEAGEDTALCDKENKPPRIAQGSSNVFINNQPAARKGDKLECSAAIVEGSPDVFIGGEQVTYLDIQPEFPPWQRMILGGITIASYLLPPAGLLGKLGNLAKLGKLGNLLGKSGKLLGAKLGALLGKTGKSLKSIANKVIRWVTDPVDPVT…
A0A3U7JBB1_SALET	RHS repeat protein (Fragment)	DP757_22775	Salmonella enterica I	1104	MYEAARVDDPVYHTSALAGFLIGAIIGIAIIALAAFALFTCGFLAGLVLGFLADQIASGVLQLGEAIGRSIHHTAGKILTGSENVSTNSRPAARAVLSTVKCDNHIAEKRIAQGSENIYINSQPAARKDDHTECDAVIEDGSPDVFLGGGTQTVLEISSEIPDWLRKVVDVLFVVAGLLGGLAGAWRQAAKLGTKFGTKCAAKFIGGELVGMAVGEAISGLFSNPVDVTTGQKILLPETDFTLPGRLPVTCSRFYASHLETVGLLGRGWRLNWETSLREDDEHITLTGVQGRELRYPKTMLTPGHQIFDPEEQLYLSRLHDGRYVLHYTDRSYYVFGDFDSDGMAYLRFMETPHRQRIVFGHEGGRLVRIASSSGHHLLLHRTQTPAGERLSRIELVQG…
A0A0E0TUN7_ECOLX	Rhs core protein	UMNK88_595	Escherichia coli UMNK88	1505	MSEGPGGPQGATAGGTLAMRMQSQRAMVASQMKRAANDKAIAQMLAAKKSGPPAARLDDEIQHKSFLGALAGAVLGAIVTIAEGCLIMAACATSPYALVLVPALMYASYKASDYVEEKQNQLESWINSFCDTDGAINTGSENVNINGKPAARAAVTLPPPPPPGAIPEIPQGEPSWGDIATDLLESAAEKAVPLAKAWGNAVITLTESNAGFMDRVSAGASLLFPAGPVLMEFATMVGGRGEIKKDVDFPEAGEDTALCDKENKPPRIAQGSSNVFINNQPAARKGDKLECSAAIVEGSPDVFIGGEQVTYLDIQPEFPPWQRMILGGITIASYLLPPAGLLGKLGNLAKLGKLGNLLGKSGKLLGAKLGALLGKTCKSLKSIANKVIRWVTDPVDPVT…
A0A3A6SGS4_ECOLX	Type IV secretion protein Rhs	D3Y67_24030	Escherichia coli	1505	MSEGPGGPQGATAGGTLAMRMQSQRAMVASQMKRAANDKAIAQMLAAKKSGPPAARLDDEIQHKSFLGALAGAVLGAIVTIAEGCLIMAACATSPYALVLVPALMYASYKASDYVEEKQNQLESWINSFCDTDGAINTGSENVNINGKPAARAAVTLPPPPPPGAIPEIPQGEPSWGDIATDLLESAAEKAVPLAKAWGNAVITLTESNAGFMDRVSAGASLLFPAGPVLMEFATMVGGRGEIKKDVDFPEAGEDTALCDKENKPPRIAQGSSNVFINNQPAARKGDKLECSAAIVEGSPDVFIGGEQVTYLDIQPEFPPWQRMILGGITIASYLLPPAGLLGKLGNLAKLGKLGNLLGKSGKLLGAKLGALLGKTCKSLKSIANKVIRWVTDPVDPVT…
A0A3M5LVE6_PSEA0	RHS protein	ALP46_101065	Pseudomonas amygdali pv. myricae	1426	MGLPHCFFCSGLAGVGAMFEAARFGDEISHSSALGGFLIGAVLGIALIATVAIATFTCGFGVALLAGLAAGVGGSLLTAAGEAIGSMFSSPSGTILTASPNVYINNRKAAHVEKSIGACEKHPGPIRIAEGSTNVFINSVAAARKGDKLTCGATISSGSNNVFIGGGRYRYLPVDDEIPGWLRTTVDVLMAVAGAAGGIAQLIKAGTQAGMKAVLPCALKFTAGFVGGEVASRYVVEPVVRSAIGGMTGNPVDTTTGRKLIPDEIDFSLPGLMPIEWSRFYASNLDVDSVLGKGWVLPWEQSLRKHGSFVYLTDNQGRTVPFVDIAPGQRIYNPHEQVYLVCTQGGHYLLQTLDNIFFYFGEVPGDNKPVPLDRIENALGQFLHFTRTEQGTLTDISAT…
A0A0N8T1K9_PSEAJ	YD repeat protein (Fragment)	ALP77_05589	Pseudomonas amygdali pv. tabaci (Pseudomonas syringae pv. tabaci)	63	MGLPHCFFCSGLAGVGAMFEAARFGDEISHSSALGGFLIGAVLGIALIATVAIATFTCGFGVA
A0A3Z0RD10_ECOLX	Type IV secretion protein Rhs (Fragment)	EG808_21750	Escherichia coli	1164	MSEGPGGPQGATAGGTLAMRMQSQRAMVASQMKRAANDKAIAQMLAAKKSGPPAARLDDEIQHKSFLGALAGAVLGAIVTIAEGCLIMAACATGPYALVLVPALMYASYKASDYVEEKQNQLESWINSFCDTDGAINTGSENVNINGKPAARAAVTLPPPPPPGAIPEIPQGEPSWGDIATDLLESAAEKAVPLAKAWGNAVITLTESNAGFMDRVSAGASLLFPAGPVLMEFATMVGGRGEIKKDVDFPEAGEDTALCDKENKPPRIAQGSSNVFINNQPAARKGDKLECSAAIVEGSPDVFIGGEQVTYLDIQPEFPPWQRMILGGITIASYLLPPAGLLGKLGNLAKLGKLGNLLGKSGKLLGAKLGALLGKTCKSLKSIANKVIRWVTDPVDPVT…
I2SZ50_ECOLX	Uncharacterized protein	EC12264_0676	Escherichia coli 1.2264	728	MSEGPGGPQGATAGGTLAMRMLSQQAMVASQMKRAANDKAIAQMLAAKKSGPPAARLGDEIQHKSFLGALAGAVLGAIVTIAEGCLIMAACATGPYALVLVPALMYASYKASDYVEEKQNQLESWINSFCDTDGAINTGSENVNINGKPAARAAVTLPPPPPPGAIPEVPQGEPSWGDIATDLLESAAEKAVPLAKAWGNAVITLTDSNAGFMDRVSAGASLLFPAGPVLMEFATMVGGRGEIKKDVDFPEAGEDTALCDKENKPPRIAQGSSNVFINNQPAARKGDKLECSAAIVEGSPDVFIGGEQVTYLDIQLEFPPWQRMILGGITIASYLLPPAGLLGKLGNLARLGKLGNLLGKSGKLLGAKLGALLGKTGKSLKSIANKVIRWVTDPVDPVT…
A0A3T8TCM1_ECOLX	Type IV secretion protein Rhs (Fragment)	D9C99_22200 DNC98_22920	Escherichia coli	891	MSEGPGGPQGATAGGTLAMRMQSQRAMVASQMKRAANDKAIAQMLAAKKSGPPAARLDDEIQHKSFLGALAGAVLGAIVTIAEGCLIMAACATGPYALVLVPALMYASYKASDYVEEKQNQLESWINSFCDTDGAINTGSENVNINGKPAARAAVTLPPPPPPGAIPEIPQGEPSWGDIATDLLESAAEKAVPLAKAWGNAVITLTESNAGFMDRVSAGASLLFPAGPVLMEFATMVGGRGEIKKDVDFPEAGEDTALCDKENKPPRIAQGSSNVFINNQPAARKGDKLECSAAIVEGSPDVFIGGEQVTYLDIQPEFPPWQRMILGGITIASYLLPPAGLLGKLGNLAKLGKLGNLLGKSGKLLGAKLGALLGKTCKSLKSIANKVIRWVTDPVDPVT…
A0A3Y4MNM3_SALET	RHS repeat protein	D6K86_13180	Salmonella enterica I	1359	MYEAARVDDPVYHTSALAGFLIGAIIGIAIIALAAFALFTCGFLAGLVLGFLADQIASGVLQLGEAIGRSIHHTAGKILTGSENVSTNSRPAARAVLSTVKCDNHIAEKRIAQGSENIYINSQPAARKDDHTECDAVIEDGSPDVFLGGGTQTVLEISSEIPDWLRKVVDVLFVVAGLLGGLAGAWRQAAKLGTKFGTKCAAKFIGGELTGMAVSEAISGLFSNPVDVTTGQKILLPETDFTLPGRLPVACSRFYASHLETVGLLGRGWRLNWETSLREDDEHLTLTGVQGRELSYPKTMLTPGHQIFDPEEQLYLSRLHDGRYVLHYTDRSYYVFGDFDSDGMAYLRFMETPHRQRIVFGHEGGRLVRIASSSGHHLLLHRTQTPAGERLSRIELVQG…
A0A3Y0G127_SALET	RHS repeat protein	DVF55_04440	Salmonella enterica I	1359	MYEAARVDDPVYHTSALAGFLIGAIIGIAIIALAAFALFTCGFLAGLVLGFLADQIASGVLQLGEAIGRSIHHTAGKILTGSENVSTNSRPAARAVLSTVKCDNHIAEKRIAQGSENIYINSQPAARKDDHTECDAVIEDGSPDVFLGGGTQTVLEISSEIPDWLRKVVDVLFVVAGLLGGLAGAWRQAAKLGTKFGTKCAAKFIGGELTGMAVSEAISGLFSNPVDVTTGQKILLPETDFTLPGRLPVACSRFYASHLETVGLLGRGWRLNWETSLREDDEHLTLTGVQGRELSYPKTMLTPGHQIFDPEEQLYLSRLHDGRYVLHYTDRSYYVFGDFDSDGMAYLRFMETPHRQRIVFGHEGGRLVRIASSSGHHLLLHRTQTPAGERLSRIELVQG…
A0A3Z7AXI0_SALET	RHS repeat protein	D5C10_22465	Salmonella enterica I	1359	MYEAARVDDPVYHTSALAGFLIGAIIGIAIIALAAFALFTCGFLAGLVLGFLADQIASGVLQLGEAIGRSIHHTAGKILTGSENVSTNSRPAARAVLSTVKCDNHIAEKRIAQGSENIYINSQPAARKDDHTECDAVIEDGSPDVFLGGGTQTVLEISSEIPDWLRKVVDVLFVVAGLLGGLAGAWRQAAKLGTKFGTKCAAKFIGGELTGMAVSEAISGLFSNPVDVTTGQKILLPETDFTLPGRLPVACSRFYASHLETVGLLGRGWRLNWETSLREDDEHLTLTGVQGRELSYPKTMLTPGHQIFDPEEQLYLSRLHDGRYVLHYTDRSYYVFGDFDSDGMAYLRFMETPHRQRIVFGHEGGRLVRIASSSGHHLLLHRTQTPAGERLSRIELVQG…
A0A3M4EYF4_PSESX	Rhs protein (Fragment)	ALQ20_04623	Pseudomonas syringae pv. atrofaciens	151	MFEAARLLDDIEHTGAMAGFVLGAIVGIAAVAYVSLTVATCGFGGFLLAMAVGLAGNAIASIGESIGSAFSSPAGQIESASPNVFINGRPAAFAIESTAVCDKHSPIVKVAEGSSNVFINGQPAARKGDKLTCGAKIGTGSPNVFIGGGTQ
A0A3Y1S676_SALET	RHS repeat protein	D7N07_23335	Salmonella enterica I	1364	MYEAARVDDPVYHTSALAGFLIGAIIGIAIIALAAFALFTCGFLAGLVLGFLADQIASGVLQLGEAIGRSIHHTAGKILTGSENVSTNSRPAARAVLSTVKCDNHIAEKRIAQGSENIYINSQPAARKDDHTECDAVIEDGSPDVFLGGGTQTVLEISSEIPDWLRKVVDVLFVVAGLLGGLAGAWRQAAKLGTKFGTKCAAKFIGGELTGMAVSEAISGLFSNPVDVTTGQKILLPETDFTLPGRLPVACSRFYASHLETVGLLGRGWRLNWETSLREDDEHLTLTGVQGRELSYPKTMLTPGHQIFDPEEQLYLSRLHDGRYVLHYTDRSYYVFGDFDSDGMAYLRFMETPHRQRIVFGHEGGRLVRIASSSGHHLLLHRTQTPAGERLSRIELVQG…
A0A070UCR0_ECOLX	RHS Repeat family protein (Fragment)	AC16_5299	Escherichia coli 2-177-06_S3_C2	1009	MSEGPGGPQGATAGGTLAMRMLSQQAMVASQMKRAANDKAIAQMLASKKSGPPAARLGDEIQHKSFLGALAGAVLGAIVTIAEGCLIMAACATGPYALVLVPALMYASYKASDYVEEKQNQLESWINSFCDTDGAINTGSENVKINGELAARAAVTLPPPPPPGAIPEVPQGEPSWGDIATDLLESAAEKAVPLAKAWGNAVITLTDSNAGFMDRVSAGASLLFPAGPVLMEFATMVGGRGEIKKEVDFPEAGEDTALCDKETKPPRIAQGSSNVFINNQPAARKGDKLECSAAIVGGSPDVFIGGEQVTYLDIQPEFPPWQRMILGGITIASYLLPPAGLLGKLKNLARLGKLGNLLGKSGKLLGAKLGALLGKTGKSLKSIANKVIRWVTDPVDPVT…
A0A3X9I303_SALET	RHS repeat protein	D4F19_05275 DS269_14865	Salmonella enterica I	1376	MYEAARVDDPVYHTSALAGFLIGAIIGIAIIALAAFALFTCGFLAGLVLGFLADQIASGVLQLGEAIGRSIHHTAGKILTGSENVSTNSRPAARAVLSTVKCDNHIAEKRIAQGSENIYINSQPAARKDDHTECDAVIEDGSPDVFLGGGTQTVLEISSEIPDWLRKVVDVLFVVAGLLGGLAGAWRQAAKLGTKFGTKCAAKFIGGELTGMAVSEAISGLFSNPVDVTTGQKILLPETDFTLPGRLPVACSRFYASHLETVGLLGRGWRLNWETSLREDDEHLTLTGVQGRELRYPKTMLTPGHQIFDPEEQLYLSRLHDGRYVLHYTDRSYYVFGDFDSDGMAYLRFMETPHRQRIVFGHEGGRLVRIASSSGHHLLLHRTQTPAGERLSRIELVQG…
A0A3Y8QW70_SALET	RHS repeat protein	EBD05_07790	Salmonella enterica I	1377	MYEAARVDDPVYHTSALAGFLIGAIIGIAIIALAAFALFTCGFLAGLVLGFLADQIASGVLQLGEAIGRSIHHTAGKILTGSENVSTNSRPAARAVLSTVKCDNHITEKRIAQGSENIYINSQPAARKDDHTECDAVIEDGSPDVFLGGGTQTVLEISSEIPDWLRKVVDVLFVVAGLLGGLAGAWRQAAKLGTKFGTKCAAKFIGGELTGMAVSEAISGLFSNPVDVTTGQKILLPETDFTLPGRLPVACSRFYASHLETVGLLGRGWRLNWETSLREDDEHLTLTGVQGRELSYPKTMLTPGHQIFDPEEQLYLSRLHDGRYVLHYTDRSYYVFGDFDSDGMAYLRFMETPHRQRIVFGHEGGRLVRIASSSGHHLLLHRTQTPAGERLSRIELVQG…
A0A3M5K0Q3_PSESS	Rhs protein with PAAR motif (Fragment)	ALP51_04810	Pseudomonas savastanoi (Pseudomonas syringae pv. savastanoi)	183	MFEAARFGDEISHTGALGGFLIGAVLGIALIATVAIATFTCGFGVALLAGLAAGVGGSLLTAAGEAIGSMFSSPSGTILTASPNVYINNRKAAHVEKSIGACEKHPGPIRIAEGSTNVFINSVAAARKGDKLTCGATISSGSNNVFIGGGRYRYLPVDDEIPGWLRTTVDVLMAVAGAAGGIA
A0A4D2RBU3_ECOLX	Type IV secretion protein Rhs	BvCmsSINP011_03605	Escherichia coli	131	MSEGPGGPQGATAGGTLAMRMLSQQAMVASQMKRAANDKAIAQMLAAKKSGPPAARLGDEIQHKSFLGALAGAVLGAIVTIAEGCLIMAACATGPYALVLVPALMRIPLYSITDWHRSPISDSHPFDQPGT
A0A0K3QPD9_ECOLX	Rhs core protein with extension	wapA_1 ERS085365_02321	Escherichia coli	1619	MSEGPGGPQGATAGGTLAMRMQSQRAMVASQMKRAANDKAIAQMLAAKKSGPPAARLDDEIQHKSFLGALAGAVLGAIVTIAEGCLIMAARATGPYALVLVPALMYASYKASDYVEEKQNQLESWINSFCDTDGAINTGSENVNINGKPAARAAVTLPPPPPPGAIPEIPQGEPSWGDIATDLLESAAEKAVPLAKAWGNAVITLTESNAGFMDRVSAGASLLFPAGPVLMEFATMVGGRGEIKKDVDFPEAGEDTALCDKENKPPRIAQGSSNVFINNQPAARKGDKLECSAAIVEGSPDVFIGGEQVTYLDIQPEFPPWQRMILGGITIASYLLPPAGLLGKLGNLAKLGKLGNLLGKSGKLLGAKLGALLGKTCKSLKSIANKVIRWVTDPVDPVT…
A7ZIV0_ECO24	YD repeat	EcE24377A_0585	Escherichia coli O139:H28 (strain E24377A / ETEC)	1600	MLSQQAMVASQMKRAANDKAIAQMLASKKSGPPAARLGDEIQHKSFLGAQAGAVLGAIVTIAEGCLIMAACATGPYALVLVPALMYASYKASDYVEEKQNQLESWINSFCDTDGAINTGSENVKINGELAARAAVTLPPPPPPGAIPEVPQGEPSWGDIATDLLESAAEKAVPLAKAWENAVITLTDSNAGFMDRVSAGASLLFPAGPVLMEFATMVGGRGEIKKEVDFPEAGEDTALCDKENKPPRIAQGSSNVFINNQPAARKGDKLECSAAIVGGSPDVFIGGEQVTYLDIQPEFPPWQRMILGGITIASYLLPPAGLLGKLKNLARLGKLGNLLGKSGKLLGAKLGALLGKTGKSLKSIANKVIRWVTDPVDPVTGAYCDERTDFTLGQTLPLSF…
A0A2K4WI34_9PSED	Cell-wall associated Rhs family protein with YD-repeats and PAAR motif	CFBP6411_04210	Pseudomonas syringae group genomosp. 3	1397	MFEAARFGDEISHTSALGGFLIGAVLGIALIATVAIATFTCGFGVALLAGLAAGVGGSLLTAAGEAIGSMFSSPSGTILTASPNVFINNRKAAHVEKSIGACEKHPGPIRIAEGSTNVFINSVAAARKGDKLTCGATISSGSNNVFIGGGRYRYLPVDDEIPGWLRTTVDILMAVAGAAGGIAQLLKAGAQAGMKAVMPCALKFTAGFVAGEVASRYVVEPVARSAIGGITGNPVDTTTGRKLIPDEIDFSLPGLMPIEWSRFYASNLDVDSVLGKGWVLPWEQSLRKLGSFVYLTDNQGRTVPFVDIAPGQRIYNPHEQVYLVCTQGGHYLLQTLDNIFFYFGEVPGNNTPVPLDRIENGLGHFLHFTRTEQGTLTDISATGGVRVHLHYDEVTTRLD…
A0A330KRA0_9PSED	Cell-wall associated Rhs family protein with YD-repeats and PAAR motif	PSCFBP3800_04345	Pseudomonas syringae group genomosp. 3	1397	MFEAARFGDEISHTSALGGFLIGAVLGIALIATVAIATFTCGFGVALLAGLAAGVGGSLLTAAGEAIGSMFSSPSGTILTASPNVFINNRKAAHVEKSIGACEKHPGPIRIAEGSTNVFINSVAAARKGDKLTCGATISSGSNNVFIGGGRYRYLPVDDEIPGWLRTTVDILMAVAGAAGGIAQLLKAGAQAGMKAVMPCALKFTAGFVAGEVASRYVVEPVARSAIGGITGNPVDTTTGRKLIPDEIDFSLPGLMPIEWSRFYASNLDVDSVLGKGWVLPWEQSLRKLGSFVYLTDNQGRTVPFVDIAPGQRIYNPHEQVYLVCTQGGHYLLQTLDNIFFYFGEVPGNNTPVPLDRIENGLGHFLHFTRTEQGTLTDISATGGVRVHLHYDEVTTRLD…
A0A2K4WM56_9PSED	Cell-wall associated Rhs family protein with YD-repeats and PAAR motif	CFBP6411_05557 PSCFBP3800_05628	Pseudomonas syringae group genomosp. 3	1405	MFEAARFGDEISHTSALGGFLIGAVLGIALIATVAIATFTCGFGVALLAGLAAGVGGSLLTAAGEAIGSMFSSPSGTILTASPNVFINNRKAAHVEKSIGACEKHPGPIRIAEGSTNVFINSVAAARKGDKLTCGATISSGSNNVFIGGGRYRYLPVDDEIPGWLRTTVDILMAVAGAAGGIAQLLKAGAQAGMKAVMPCALKFTAGFVAGEVASRYVVEPVARSAIGGITGNPVDTTTGRKLIPDEIDFSLPGLMPIEWSRFYASNLDVDSVLGKGWVLPWEQSLRKLGSFVYLTDNQGRTVPFVDIAPGQRIYNPHEQVYLVCTQGGHYLLQTLDNIFFYFGEVPGNNTPVPLDRIENGLGHFLHFTRTEQGTLTDISATGGVRVHLHYDEVTTRLD…
A0A237FT57_SHIBO	Type IV secretion protein Rhs (Fragment)	CI719_08860	Shigella boydii	818	MSEGPGGPQGATAGGTLAMRMLSQQAMVASQMKRAANDKAIAQMLASKKSGPPAARLGDEIQHKSFLGALAGAVLGAIVTIAEGCLIMAACATGPYALVLVPALMYASYKASDYVEEKQNQLESWINSFCDTDGAINTGSENVNINGKPAARAAVTLPPPPPPGAIPEIPQGEPSWGDIATDLLESAAEKAVPLAKAWGNAVITLTDSNAGFMDRVSAGASLLFPAGPVLMEFATMVGGRGEIKKDVDFPEAGEDTALCDKENKPPRIAQGSSNVFINNQPAARKGDKLECSAAIVEGSPDVFIGGEQVTYLDIQPEFPPWQRMILGGITIASYLLPPAGLLGKLKNLARLGKLGNLLGKSGKLLGAKLGALLGKTGKSLKSIANKVIRWVTDPVDPVT…
A0A2V2T207_9PSED	Type IV secretion protein Rhs (Fragment)	DK254_31770	Pseudomonas sp. RW407	271	MYEAARLHDEIAHTSALAGFLIGAALGIALVATVAIATFTCGFGVALLAGILAGVGGSLLTAAGEAIGRMFTSPAGMIDKGSPNVYINQRNAAHVERSTAICDKHPPLIQVAEGSSNVFINDVAAARKGDKLTCGAKIDGGSSDVFIGGGTVQYLPVDDEVPGWLRTTVDILMAVAGAAGGIAQLIKAGTQAGMKAIMPCVLKFTAGFVAGEVASRYVLGPAINRAVGGLFGNPVDATTGRKLLTEAGETDFSLPGLMPIQWSRFYASDLD
A0A2D2DEV1_9BURK	Uncharacterized protein	CR152_02520	Massilia violaceinigra	1422	MFEAARITDPISHTNALTGFLIGALIGIALIAAVAFATFTCGFGVALIAGLAAGFGASGILSLGEAIGKMSTTVTGTLVTGSLNVWTNGLAATYAKVSTAACSMHNPVQLVAEGSGNVYINGLPAARKDDAITCGAKISGGSSNVFIGGGREPYLPVADEIPPGLRTAVDWAFTAAGAVGGIGKLLCKAGGGLTRAVLPCAARFLAGFAAGEALSRYVIAPVVGRAIGGLLGEPVDVTTGRKLLLAQEETDFVLPGQIPLTGARFYGSNLERVGDLGRGWVLPWEVWLQARDGKVWYSDGQGRETGFPMMQPGHAEFSESEQCFLTRSADGRFIMYDVNDVYYDFGQLDVTGGELAPLLRIEDRSGQWQHYARDAAQRLLSIETSDGQMVRLAYGAQSG…
A0A562P717_9BURK	YD repeat-containing protein (Fragment)	IP92_05906	Massilia flava	1116	MYEAARLTDPIAHTSALGGFLIGALIGVALIAAVAFATFTCGFGVALLAGLAAGIGATAILGLGEAIGRSFSSRAGKITSGSPNVFTNSRAAAYATVSTVACDKHNPTPLVAEGSGTVFINGLPAARKKDKITCGATIDDGSNNVVIGGGTVTYLPVDDEVPPWLRTTVDWAFALAGLVGGLAGLVKAAGGLSRAVLPCAAKFIGGFMVGEAVGRYVAAPVISRVMGGLFGQPVDVTTGRKVLLAQNEIDFVVPDPIPVVISRFYSSDLEWEGTLGRGWLLPWDLRLQRRDGQMWLFDAQGRETGFPVVPPGHTLYSEVEQRYLACTPDGRYILYDLNERYLDFGYFDGDEGETHWLQRQENRTGQWISYERDQHQRVHTIRTGSGVVLRLHYGGSRLT…
S6WFX4_PSESF	Rhs family protein (Fragment)	A244_03927	Pseudomonas syringae pv. actinidiae ICMP 18807	136	MFEAARLMDEIDHTSAMTGFVLGAIVGIAAVAYVSFTVATCGLGGILLGLAVGLAGNAIASLGESIGAAFSSAAGQIESGSPNVFINGRPAAFAIDSTAVCEKHSPIVKVAEGSSNVFINGKPAARKGDKLTCGAK
I3UY87_PSEPU	Rhs-related protein	YSA_06844	Pseudomonas putida ND6	246	MFEAARFGDEISHTSALGGFLIGAALGIALVATVAIATFTCGFGVALLAGLAAGIGGSLLTAAGEAIGSMFSSPSGTITTASPNVFINSRKAARVEKSIGACDKHPGPVQIAEGSTNVFINSVAAARKGDKLTCGATISGGSENVIIGGGTYRYLPVDDEVPEWLRTTVDVLMAIAGAAGGIAQLIKAGTQAGMKAVMPCALKFTAGFVAGEVASRYVVEPVARKAIGGLVGNPVDLHDGPQADPR
A0A3M2Z6D4_PSESS	YD repeat protein (Fragment)	ALQ88_05745	Pseudomonas savastanoi (Pseudomonas syringae pv. savastanoi)	886	MAMFEAARLLDEIEHTGALTGFLLGAVVGIAAVAYVSFTFVTCGFGGILLGLAVGLAGNALASLGEAIGSAFSSPAGQIESASPNVFINGRPAAFAIESTAVCDKHSPIVKVAEGSSNVFINGLPAARKGDKLTCGAKIGTGSPNVFIGGGTQRYLPVDDEVSAMYRYTVDILLIVAGGAKAVTSIAKLGMQAGLKAAGPCALRFMGGVFLGDAIFRFGVAPLAEKVLGGLHGNPVDTTTGRKLLIDESDFGLPGLMPIEWTRFYASDLTVDSALGKGWVLPWEQSLRRKGSFLYLSDNQGRSVPFVTLDYNQRIYNAQEQLYLVRTEGGHYLLQTLDNVFYYFGEVPDDNQPVPLERIENALGHFLHFVRSEDGVLTDICATGGQRVHLHYDEVTSRL…
A0A377E8W1_ECOLX	RHS Repeat family protein	NCTC10429_06081	Escherichia coli	1012	MSEGPGGPQGATAGGTLAMRMLSQQAMVASQMKRAANDKAIAQMLAAKKSGPPAARLGDEIQHKSFLGALAGAVLGAIVTIAEGCLIMAACATGPYALVLLPALMYASYKASDYVEEKQNQLESWINSFCDTDGAINTGSENVNINGKPAARAAVTLPPPPPPGAIPEVPQGEPSWGDIATDLLESAAEKAVPLAKAWGNAVITLTDSNAGFMDRVSAGASLLFPAGPVLMEFATMVGGRGEIKKDVDFPEAGEDTALCDKENKPPRIAQGSSNVFINNQPAARKGDKLECSAAIVEGSPDVFIGGEQVTYLDIQLEFPPWQRMILGGITIASYLLPPAGLLGKLGNLARLGKLGNLLGKSGKLLGAKLGALLGKTGKSLKSIANKVIRWVTDPVDPVT…
A0A3U5EXF7_ECOLX	Type IV secretion protein Rhs (Fragment)	DP265_26395	Escherichia coli	964	MSEGPGGPQGATAGGTLAMRMLSQQAMVASQMKRAANDKAIAQMLAAKKSGPPAARLGDEIQHKSFLGALAGAVLGAIVTIAEGCLIMAACATGPYALVLVPALMYASYKASDYVEEKQNQLESWINSFCDTDGAINTGSENVNINGKPAARAAVTLPPPPPPGAIPEVPQGEPSWGDIATDLLESAAEKAVPLAKAWGNAVITLTDSNAGFMDRVSAGASLLFPAGPVLMEFATMVGGRGEIKKEVDFPEAGEDSALCDKENKPPRIAQGSSNVFINNQPAARKGDKLECSAAIVEGSPDVFIGGEQVTYLDIQPEFPPWQRMILGGITIASYLLPPAGLLGKLKNLARLGKLGNLLGKSGKLLGAKLGALLGKTGKSLKSIANKVIRWVTDPVDPVT…
A0A0P9RJN0_9PSED	YD repeat protein (Fragment)	ALO68_05228	Pseudomonas syringae pv. helianthi	61	MGLPHCFFCSGLAGVGAMFEAARFGDEISHSSALGGFLIGAVLGIALIATVAIATFTCGFG
F3WEZ1_9ENTR	RHS Repeat family protein	SB521682_0561	Shigella boydii 5216-82	902	MSEGPGGPQGATAGGTLAMRMLSQQAMVASQMKRAANDKAIAQMLASKKSGPPAARLGDEIQHKSFLGALAGAVLGAIVTIAEGCLIMAACATGPYALVLVPALMYASYKASDYVEEKQNQLESWINSFCDTDGAINTGSENVKINGELAARAAVTLPPPPPPGAIPEVPQGEPSWGDIATDLLESAAEKAVPLAKAWGNAVITLTDSNAGFMDRVSAGASLLFPAGPVLMEFATMVGGRGEIKKDVDFPEAGEDTALCDKENKPPRIAQGSSNVFINNQPAARKGDKLECSAAIVGGSPDVFIGGEQVTYLDIQPEFPPWQRMILGGITIASYLLPPAGLLGKLKNLARLGKLGNLLGKSGKLLGAKLGALLGKTGKSLKSIANKVIRWVTDPVDPVT…
A0A0Q0BRC3_PSEAP	YD repeat protein (Fragment)	ALO85_05075	Pseudomonas syringae pv. aptata	255	MFEAARFGDEISHTGALGGFLIGAVLGIALIATVAIATFTCGFGVALLAGLAAGVGGSLLTAAGEAIGSMFSSPSGTIITASPNVYINNRKAAHVEKSIGACDKHPGPVKIAEGSTNVFINSVAAARKGDKLTCGATISGGSDNVFIGGGRYRYLPVDDEIPGWLRTTVDVLMAVAGAAGGIAQLIKAGTQAGMKAVLPCALKFTAGFVAGEVGSRYVVEPVMRSAIGGLSGNPVDTTTGRKLIPDEIDFSLPGL
A0A3T7NK21_ECOLX	Type IV secretion protein Rhs (Fragment)	DM123_26850	Escherichia coli	986	MSEGPGGPQGATAGGTLAMRMLSQQAMVASQMKRAANDKAIAQMLAAKKSGPPAARLGDEIQHKSFLGALAGAVLGAIVTIAEGCLIMAACATGPYALVLVPALMYASYKASDYVEEKQNQLESWINSFCDTDGAINTGSENVNINGKPAARAAVTLPPPPPPGAIPEVPQGEPSWGDIATDLLESAAEKAVPLAKAWGNAVITLTDSNAGFMDRVSAGASLLFPAGPVLMEFATMVGGRGEIKKEVDFPEAGEDSALCDKENKPPRIAQGSSNVFINNQPAARKGDKLECSAAIVEGSPDVFIGGEQVTYLDIQPEFPPWQRMILGGITIASYLLPPAGLLGKLKNLARLGKLGNLLGKSGKLLGAKLGALLGKTGKSLKSIANKVIRWVTDPVDPVT…
A0A3T6YVT6_ECOLX	Type IV secretion protein Rhs (Fragment)	DMY56_09595	Escherichia coli	982	MSEGPGGPQGATAGGTLAMRMLSQQAMVASQMKRAANDKAIAQMLASKKSGPPAARLGDEIQHKSFLGALAGAVLGAIVTIAEGCLIMAACATGPYALVLVPALMYASYKASDYVEEKQNQLESWINSFCDTDGAINTGSENVNINGKPAARAAVTLPPPPPPGAIPEVPQGEPSWGDIATDLLESAAEKAVPLAKAWGNAVITLTDSNAGFMDRLCAGTSLLFPAGPVLMEFATMVGGRGEIKKEVDFPEAGEDTALCDKENKPPRIAQGSSNVFINNRPAARQGDKLECSAAIVGGSPDVFIGGEQVTYLDIQPEFPPWQRMILGGITIASYLLPPAGLLGKLKNLARLGKLGNLLGKSGKLLGAKLGALLGKTGKSLKSIANKVIRWVTDPVDPVT…
A0A2I6T8H1_ECOLX	RHS Repeat family protein	YDC107_3829	Escherichia coli	739	MSEGPGGPQGATAGGTLAMRMLSQQAMVASQMKRAANDKAIAQMLASKKSGPPAARLGDEIQHKSFLGALAGAVLGAIVTIAEGCLIMAACATGPYALVLVPALMYASYKASDYVEEKQNQLESWINSFCDTDGAINTGSKNVKINGELAARAAVTLPPPPPPGAIPEVPQGDPSWGDIATDLLESAAEKAVPLAKAWGNAVITLTDSNAGIMDRVSAGASLLFPAGPVLMEFATMVGGRGEIKKDVDFPEAGEDTALCDKENKPPRIAQGSSNVFINNQPAARKGDKLECSAAIVEGSPDVFIGGEQVTYLDIQPEFPPWQRMILGGITIASYLLPPAGLLGKLKNLAKLGKLGNLLGNSGKLLGAKLGALLGKTGKSLKSIANKVIRWVTDPVDPVT…
A0A377DHR8_ECOLX	Rhs core protein with extension	wapA_5 NCTC7922_06439	Escherichia coli	1620	MSEGPGGPQGATAGGTLAMRMLSQQAMVASQMKRAANDKAIAQMLASKKSGPPAARLGDEIQHKSFLGALAGAVLGAIVTIAEGCLIMAACATGPYALVLVPALMYASYKASDYVEEKQNQLESWINSFCDTDGAINTGSENVNINGKPAARAAVTLPPPPPPGAIPEIPQGEPSWGDIATDLLESAAEKAVPLAKAWGNAVITLTDSNAGFMDRVSAGASLLFPAGPVLMEFATMVGGRGEIKKDVDFPEAGEDTALCDKENKPPRIAQGSSNVFINNQPATRKGDKLECSAAIVEGSPDVFIGGEQVTYLDIQPEFPPWQRMILGGITIASYLLPPAGLLGKLKNLARLGKLGNLLEKSGKLLGAKLGALLGKTGKSLKSIANKVIRWVTDPVDPVT…
A0A376MCG3_ECOLX	Rhs core protein with extension	wapA_4 NCTC7927_04062	Escherichia coli	1620	MSEGPGGPQGATAGGTLAMRMLSQQAMVASQMKRAANDKAIAQMLASKKSGPPAARLGDEIQHKSFLGALAGAVLGAIVTIAEGCLIMAACATGPYALVLVPALMYASYKASDYVEEKQNQLESWINSFCDTDGAINTGSENVNINGKPAARAAVTLPPPPPPGAIPEIPQGEPSWGDIATDLLESAAEKAVPLAKAWGNAVITLTDSNAGFMDRVSAGASLLFPAGPVLMEFATMVGGRGEIKKDVDFPEAGEDTALCDKENKPPRIAQGSSNVFINNQPATRKGDKLECSAAIVEGSPDVFIGGEQVTYLDIQPEFPPWQRMILGGITIASYLLPPAGLLGKLKNLARLGKLGNLLEKSGKLLGAKLGALLGKTGKSLKSIANKVIRWVTDPVDPVT…
A0A3M5NUI2_PSESS	Rhs protein (Fragment)	ALP42_04721	Pseudomonas savastanoi pv. nerii	968	MAMFEAARLLDEIEHTGALTGFLLGAVVGIAAVAYVSFTFVTCGFGGILLGLAVGLAGNALASLGEAIGSAFSSPAGQIESASPNVFINGRPAAFAIESTAVCDKHSPIVKVAEGSSNVFINGLPAARKGDKLTCGAKIGTGSPNVFIGGGTQRYLPVDDEVSAMYRYTVDILLIVAGGAKAVTSIAKLGMQAGLKAAGPCALRFMGGVFLGDAIFRFGVAPLAEKVLGGLHGNPVDTTTGRKLLIDESDFGLPGLMPIEWTRFYASDLTVDSALGKGWVLPWEQSLRRKGSFLYLSDNQGRSVPFVTLDYNQRIYNAQEQLYLVRTEGGHYLLQTLDNVFYYFGEVPDDNQPVPLERIENALGHFLHFVRSEDGVLTDICATGGQRVHLHYDEVTSRL…
A0A3M4E375_PSESS	YD repeat-containing protein (Fragment)	ALQ22_04698	Pseudomonas savastanoi pv. retacarpa	981	MAMFEAARLLDEIEHTGALTGFLLGAVVGIAAVAYVSFTFVTCGFGGILLGLAVGLAGNALASLGEAIGSAFSSPAGQIESASPNVFINGRPAAFAIESTAVCDKHSPIVKVAEGSSNVFINGLPAARKGDKLTCGAKIGTGSPNVFIGGGTQRYLPVDDEVSAMYRYTVDILLIVAGGAKAVTSIAKLGMQAGLKAAGPCALRFMGGVFLGDAIFRFGVAPLAEKVLGGLHGNPVDTTTGRKLLIDESDFGLPGLMPIEWTRFYASDLTVDSALGKGWVLPWEQSLRRKGSFLYLSDNQGRSVPFVTLDYNQRIYNAQEQLYLVRTEGGHYLLQTLDNVFYYFGEVPDDNQPVPLERIENALGHFLHFVRSEDGVLTDICATGGQRVHLHYDEVTSRL…
A0A3M3NYA6_PSESS	YD repeat protein (Fragment)	ALQ55_04462	Pseudomonas savastanoi pv. savastanoi	981	MAMFEAARLLDEIEHTGALTGFLLGAVVGIAAVAYVSFTFVTCGFGGILLGLAVGLAGNALASLGEAIGSAFSSPAGQIESASPNVFINGRPAAFAIESTAVCDKHSPIVKVAEGSSNVFINGLPAARKGDKLTCGAKIGTGSPNVFIGGGTQRYLPVDDEVSAMYRYTVDILLIVAGGAKAVTSIAKLGMQAGLKAAGPCALRFMGGVFLGDAIFRFGVAPLAEKVLGGLHGNPVDTTTGRKLLIDESDFGLPGLMPIEWTRFYASDLTVDSALGKGWVLPWEQSLRRKGSFLYLSDNQGRSVPFVTLDYNQRIYNAQEQLYLVRTEGGHYLLQTLDNVFYYFGEVPDDNQPVPLERIENALGHFLHFVRSEDGVLTDICATGGQRVHLHYDEVTSRL…
A0A3M8SRV2_PSEPU	Type IV secretion protein Rhs (Fragment)	EFK07_23035	Pseudomonas putida (Arthrobacter siderocapsulatus)	254	MFEAARWGDEIEHTGALAGFLAGAVIGLAIAAAAAFMICTGGLGGVLLGAVIGLGASMIPMLGEKFGSSFSSPAGQIELAGCSTNVFINNRNAAHAELSTAKCDKHPPPVRVAEGSSNVFINGVAASRKGDKLTCGAKISGGSNNVFIGGGTSRYLPVDEEVPEWLRVTVDVLMIVASMGRSIASVYRLGLQAGLKAAGPCALRVGASIAGSYLAGRFIIGPAIERAIGGFVGNPVDLTNGRKLLGDETDFVLP
V8KJ00_ECOLX	Type IV secretion protein Rhs (Fragment)	V415_04210	Escherichia coli LAU-EC10	1037	MSEGPGGPQGATAGGTLAMRMLSQQAMVASQMKRAANDKAIAQMLASKKSGPPAARLGDEIQHKSFLGALAGAVLGAIVTIAEGCLIMAACATGPYALVLVPALMYASYKASDYVEEKQNQLESWINSFCDTDGAINTGSENVNINGKPAARAAVTLPPPPPPGAIPEIPQGEPSWGDIATDLLESAAEKAVPLAKAWGNAVITLTDSNAGFMDRVSAGASLLFPAGPVLMEFATMVGGRGEIKKDVDFPEAGEDTALCDKENKPPRIAQGSSNVFINNQPAARKGDKLECSAAIVEGSPDVFIGGEQVTYLDIQPEFPPWQRMILGGITIASYLLPPAGLLGKLKNLARLGKLGNLLGKSGKLLGAKLGALLGKTGKSLKSIANKVIRWVTDPVDPVT…
A0A3M2YUB3_PSESS	YD repeat protein (Fragment)	ALQ90_05192	Pseudomonas savastanoi pv. savastanoi	998	MAMFEAARLLDEIEHTGALTGFLLGAVVGIAAVAYVSFTFVTCGFGGILLGLAVGLAGNALASLGEAIGSAFSSPAGQIESASPNVFINGRPAAFAIESTAVCDKHSPIVKVAEGSSNVFINGLPAARKGDKLTCGAKIGTGSPNVFIGGGTQRYLPVDDEVSAMYRYTVDILLIVAGGAKAVTSIAKLGMQAGLKAAGPCALRFMGGVFLGDAIFRFGVAPLAEKVLGGLHGNPVDTTTGRKLLIDESDFGLPGLMPIEWTRFYASDLTVDSALGKGWVLPWEQSLRRKGSFLYLSDNQGRSVPFVTLDYNQRIYNAQEQLYLVRTEGGHYLLQTLDNVFYYFGEVPDDNQPVPLERIENALGHFLHFVRSEDGVLTDICATGGQRVHLHYDEVTSRL…
G4C0Z0_SALIN	RHS repeat-associated core domain protein	SEENIN0B_01116	Salmonella enterica subsp. enterica serovar Infantis str. SARB27	1579	MSEGQDGPQGAMTGGSLAVRMMSLRAMAASQMKRAANDKTLAQTLASHKSGPPAARLGDKIQHKSFLGALAGAVVGAIVTIAEGGLIAAACLTGPYALVLVPALIYGSYKADDYVEEKQDQLESWINSFCDPDGAINTGSKNVRINGKPAARAAVTLPPPPPPEAIPSPSQGEPSWGDIAGGVLDSAMEKAAPLGNAFSTALNTLTDSNASFMDRAAAGASLLLPCGPVIMEFTEMVGGRGGIKKDVDFPEAGEDTAICDKENKPPKIAQGSSNVFINNQPAARQGDKLECSAAIVEGSPNVFIGGEQVTYLDIQPEFPPWQRAILGGITIASYLLPPASLVGKLGTFLGKAGKLLGPKLGALLARTGKIKGAFGKFIKWLKDPVDPVTGAFCDERTDF…
A0A1X0MXM3_9PSED	Type IV secretion protein Rhs (Fragment)	BZK31_27560	Pseudomonas floridensis	669	MYEAARFGDEISHTSALGGFLIGAALGIALIATVAIATFTCGFGVALLAGLAAGVGGSLLTAAGEAIGSMFSSPSGTITTGSPDVYINNRKAAHVEKSIAACEKHPGPVKIAEGSTNVFINGVAAARKEDKITCGGKITSGSNNVFIGGGTYRYLPVDDEIPGWLRTTVDILMAVAGAAGGIAQLIKAGTQAGMKAIMPCALKFTAGFVAGEVASRYVVEPVARSAIGGLAGNPVDTTTGRKLIPDEIDFSLPGLMPIEWSRFYASDLTVDSVLGKGWVLPWEQSLRRHGRFVYLTDNQGRSVPFVDVQPGERIYNPHEQVYLVCTQGGHYLLQTLDNIFFYFGEVPNTNTTVPLQRIENGLGHFLHFTRTDDGTLTDISATGGVRVHLHYEEGSTRLN…
A0A3M6FHL1_PSEAQ	YD repeat-containing protein	ALP04_00811	Pseudomonas amygdali pv. sesami (Pseudomonas syringae pv. sesami)	309	MFEAARFGDEISHTGALGGFLIGAVLGIALIATVAIATFTCGFGVALLAGLAAGVGGSLLTAAGEAIGSMFSSPSGTIITASPNVYINNRKAAHVEKSIGACDKHPGPIRIAEGSTNVFINSVAAARKGDKLTCGATISSGSNNVFIGGGRYRYLPVDDEIPGWLRTTVDVLMAVAGAAGGIAQLIKAGTQAGMKAVLPCAMKFTAGFVAGEVGSRYVVEPVMRSAIGGLSGNPVDTTTGRKLIPDELDFSLPGLMPIEWSRFYASNLNVDSVLGKGWVLPWEQSLRKRGSFLYLTDNQGRTVPYRSWT
A0A0P9XNB9_PSESS	YD repeat-containing protein (Fragment)	ALO49_04743	Pseudomonas savastanoi pv. retacarpa	1049	MAMFEAARLLDEIEHTGALTGFLLGAVVGIAAVAYVSFTFVTCGFGGILLGLAVGLAGNALASLGEAIGSAFSSPAGQIESASPNVFINGRPAAFAIESTAVCDKHSPIVKVAEGSSNVFINGLPAARKGDKLTCGAKIGTGSPNVFIGGGTQRYLPVDDEVSAMYRYTVDILLIVAGGAKAVTSIAKLGMQAGLKAAGPCALRFMGGVFLGDAIFRFGVAPLAEKVLGGLHGNPVDTTTGRKLLIDESDFGLPGLMPIEWTRFYASDLTVDSALGKGWVLPWEQSLRRKGSFLYLSDNQGRSVPFVTLDYNQRIYNAQEQLYLVRTEGGHYLLQTLDNVFYYFGEVPDDNQPVPLERIENALGHFLHFVRSEDGVLTDICATGGQRVHLHYDEVTSRL…
A0A3M5P396_PSESS	YD repeat-containing protein (Fragment)	ALP41_04566	Pseudomonas savastanoi pv. nerii	1049	MAMFEAARLLDEIEHTGALTGFLLGAVVGIAAVAYVSFTFVTCGFGGILLGLAVGLAGNALASLGEAIGSAFSSPAGQIESASPNVFINGRPAAFAIESTAVCDKHSPIVKVAEGSSNVFINGLPAARKGDKLTCGAKIGTGSPNVFIGGGTQRYLPVDDEVSAMYRYTVDILLIVAGGAKAVTSIAKLGMQAGLKAAGPCALRFMGGVFLGDAIFRFGVAPLAEKVLGGLHGNPVDTTTGRKLLIDESDFGLPGLMPIEWTRFYASDLTVDSALGKGWVLPWEQSLRRKGSFLYLSDNQGRSVPFVTLDYNQRIYNAQEQLYLVRTEGGHYLLQTLDNVFYYFGEVPDDNQPVPLERIENALGHFLHFVRSEDGVLTDICATGGQRVHLHYDEVTSRL…
A0A3A6RN07_9PSED	Type IV secretion protein Rhs	D3M70_05725	Pseudomonas sp. LS-2	1402	MFEAARFGDEIEHTSALGGFLIGAALGIALVATVAIATFTCGFGVALLAGLAAGIGGSLLTAAGEAVGKWFSSPSGTIVTASSNVFVNSRQAAHVAQSLGACSKHPGPVQIAEGSTNVFINGTAAARKGDKLTCGATISSGSGNVLIGGGTHRYLPVDDEIPGWLRTTVDVLMAVAGAAGGIAQLIKAGSQAGMKAIMPCVMKFTAGFVAGEVASRYVVGPAIERAVGGMTGNPVDLTTGRKVIPDETDFSLPGLMSIEWSRFYGSDLNVDSVLGRGWVLPWEQSLRRSGSFVYLTDNQGRSVPFVALQPGERVYNPYEQVYLVCSEGGHYLLQTLDNIFFYFGEVPDGNCPVPLQRIENALGHFLHFTRTVDGVLTDISATGGTRVHLHYDNPLGRLT…
A0A2T0L124_9BURK	RHS repeat-associated protein	B0G75_10453	Paraburkholderia sp. BL18I3N2	1407	MFEAARVGDEIQHTSALAGFLIGAILGAALIFAVAMLTFSCPLLVGFIAGFMASMIAEQIVNIATQLGSLFTSTTGSITEGSANVFVNGRAAVPAKISAAACDHDTPHELAACGSSTVFINQHVAARKGDDIQCGATIEKGSKNVFFGSDKACEIAVASEIPAWAVNFKNALFLVAGVAGGLAGALKNGMKATCPCVLKFLAGQVAGIYVGSKVSEGVSGLFGHPVHVPTGQKVLVNELDFELPGLLPFFGSRSYSSAIDTCGMLGRGWQHNWDIHLKRSSRGLEYVGFQGREVGFDDIPAGQYQYNSFEQLYLSHALDGRYVLNGLDEIFYGFSVHPLNGRHVLERIEDKFGHFIEFRRDSGGALVGVRNDADVILELLHADGRLIGVDRIDGTRRSL…
A0A355R077_PSESP	Type IV secretion protein Rhs (Fragment)	DD418_00400	Pseudomonas sp.	476	MFEAARFGDEISHTSALGGFLIGAALGIALVATVAIATFTCGFGVALLAGLAAGIGGSLLTAAGEAIGSMFSSPSGTITTASPNVFINSRKAARVEKSIGACDKHPGPVQIAEGSTNVFINSVAAARKGDKLTCGATISGGSDNVIIGGGTYRYLPVDDEVPEWLRTTVDVLMAIAGAAGGIAQLIKAGTQAGMKAVMPCALKFTAGFVAGEVASRYVVEPVARKAIGGLVGNPVDLTTGRKLIPDEIDFSLPGLMPIEWSRFYASDLTVDSVLGRGWVLPWEQSLRRQGAFIYLTDNQGREVPFVTLQPGQRIYNPHEQVYLVCTEGGHYILQTLDNLFFYFGEVPDTNTEVPLQRIENVLGHFLHFTRTPDGTLTDISATGGTRVHLHYDNPLGRLT…
A0A3M5YXH5_9PSED	Rhs protein with PAAR motif (Fragment)	ALP20_04248	Pseudomonas coronafaciens pv. coronafaciens	613	MMFEAARFGDEISHTGALGGFLIGAVLGIALIATVAIATFTCGFGVALLAGLAAGVGGSLLTAAGEAIGSMFSSPSGTIITASPNVYINNRKAAHVEKSIGACEKHPGPVKIAEGSTNVFINSVAAARKGDKLTCGATISGGSDNVFIGGGRYRYLPVDDEIPGWLRTTVDVLMAVAGAAGGIAQLLKAGAQAGMKAVLPCALKFTAGFVAGEVASRYVVEPVARRAIGGLSGNPVDTTTGRKLIPDEIDFSLPGLMPIEWSRFYASNLDVDSVLGKGWVLPWEQSLRKNGSFVYLTDNQGRTVPFVDVAPGQRIYNPHEQVYLVCTQGGHYLLQTLDNIFFYFGEVPGDNTPVPLDRIENSLGHFLHFTRTEQGTLTDISATGGVRVHLHYDEVTTRL…
A0A4C5VGN2_ECOLX	Type IV secretion protein Rhs	HmCmsJML074_02729	Escherichia coli	877	MSEGPGGPQGATAGGTLAMRMLSQQAMVASQMKRAANDKAIAQMLASKKSGPPAARLGDEIQHKSFLGALAGAVLGAIVTIAEGCLIMAACATGPYALVLVPALMYASYKASDYVEEKQNQLESWINSFCDTDGAINTGSENVNINGKPAARAAVTLPPPPPPGAIPEIPQGEPSWGDIATDLLESAAEKAVPLAKAWGNAVITLTDSNAGFMDRVSAGASLLFPAGPVLMEFATMVGGRGEIKKDVDFPEAGEDTALCDKENKPPRIAQGSSNVFINNQPAARKGDKLECSAAIVEGSPDVFIGGEQVTYLDIQPEFPPWQRMILGGITIASYLLPPAGLLGKLKNLARLGKLGNLLGKSGKLLGAKLGALLGKTGKSLKSIANKVIRWVTDPVDPVT…
A0A3M5AXX2_PSESS	YD repeat protein (Fragment)	ALP70_04589	Pseudomonas savastanoi (Pseudomonas syringae pv. savastanoi)	60	MGLPHCFFCSGLAGVGAMFEAARFGDEISHSSALGGFLIGAVLGIALIATVAIATFTCGF
[truncated: 1,239 more rows]

## Sheet: List B
UniProtKB_ID	Protein name	Gene name	Organism	# of TM regions	Length	AA sequence
[truncated: 975 more rows]
