# Supplementary figures and images for: Structural basis for effector transmembrane domain recognition by type VI secretion system chaperones
Source: eLife journal article supplement (doi:10.7554/elife.62816), 2020-12-15

Figure 2—supplement 1

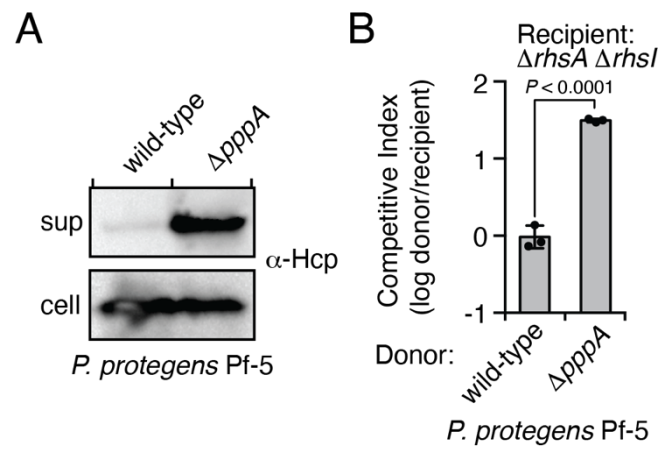

Supplement: supp [file elife-62816-supp-v1.zip]

Figure 4—supplement 1

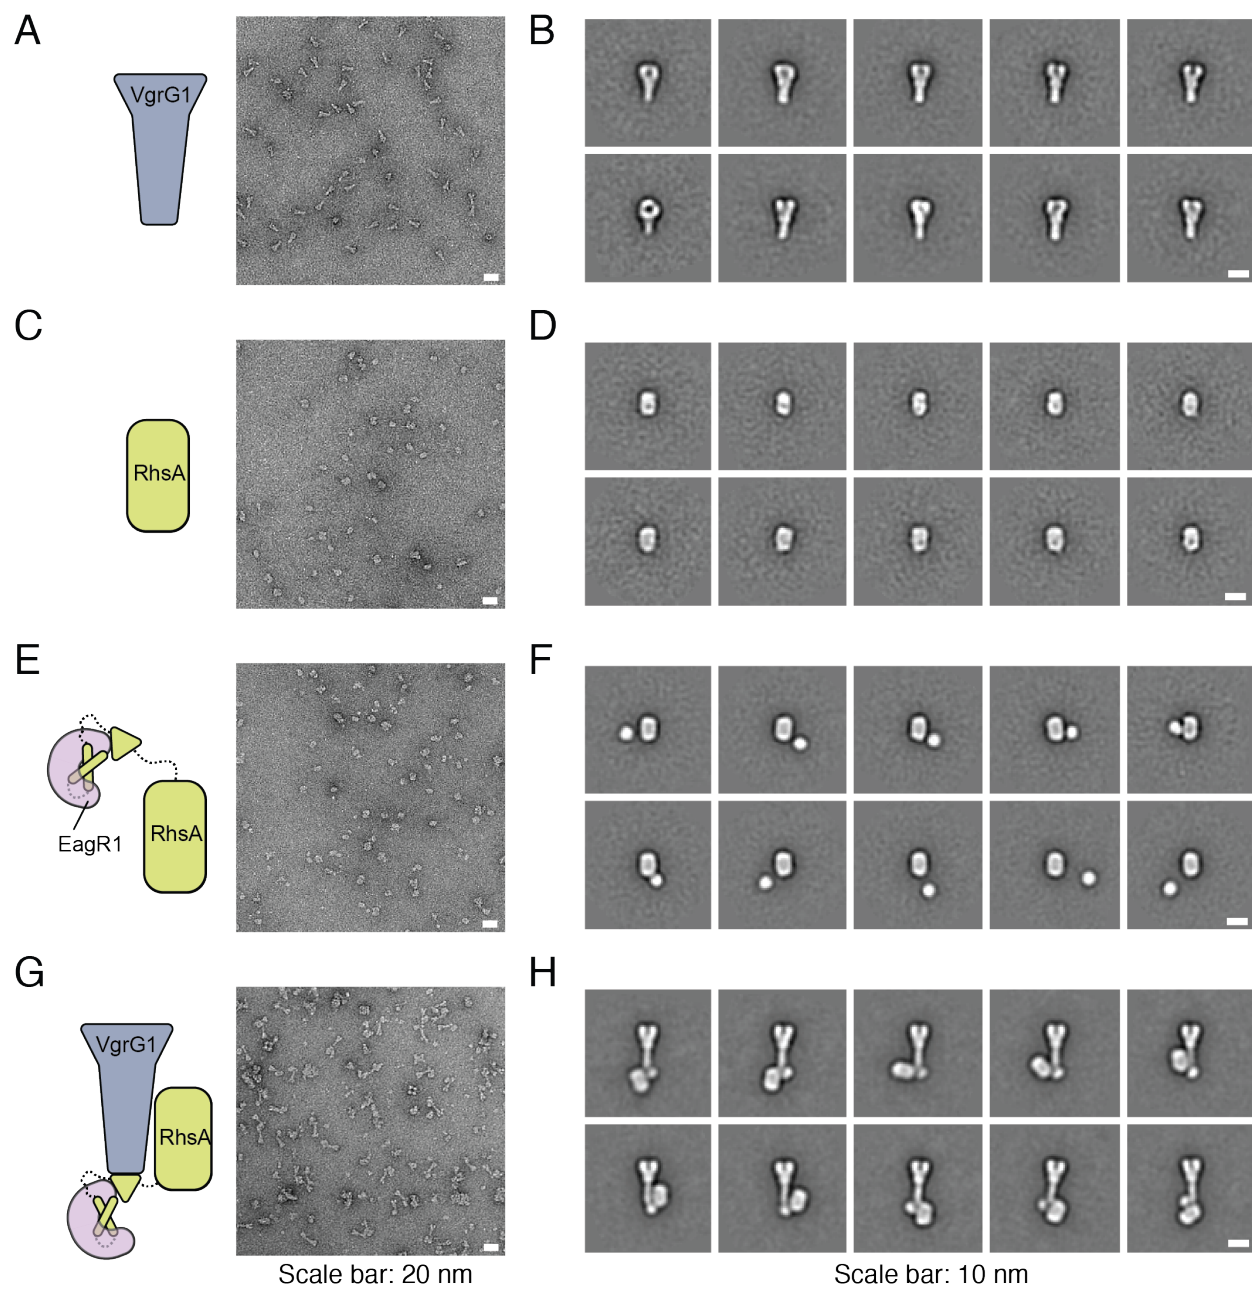

Supplement: supp [file elife-62816-supp-v1.zip]

Figure 5—supplement 1

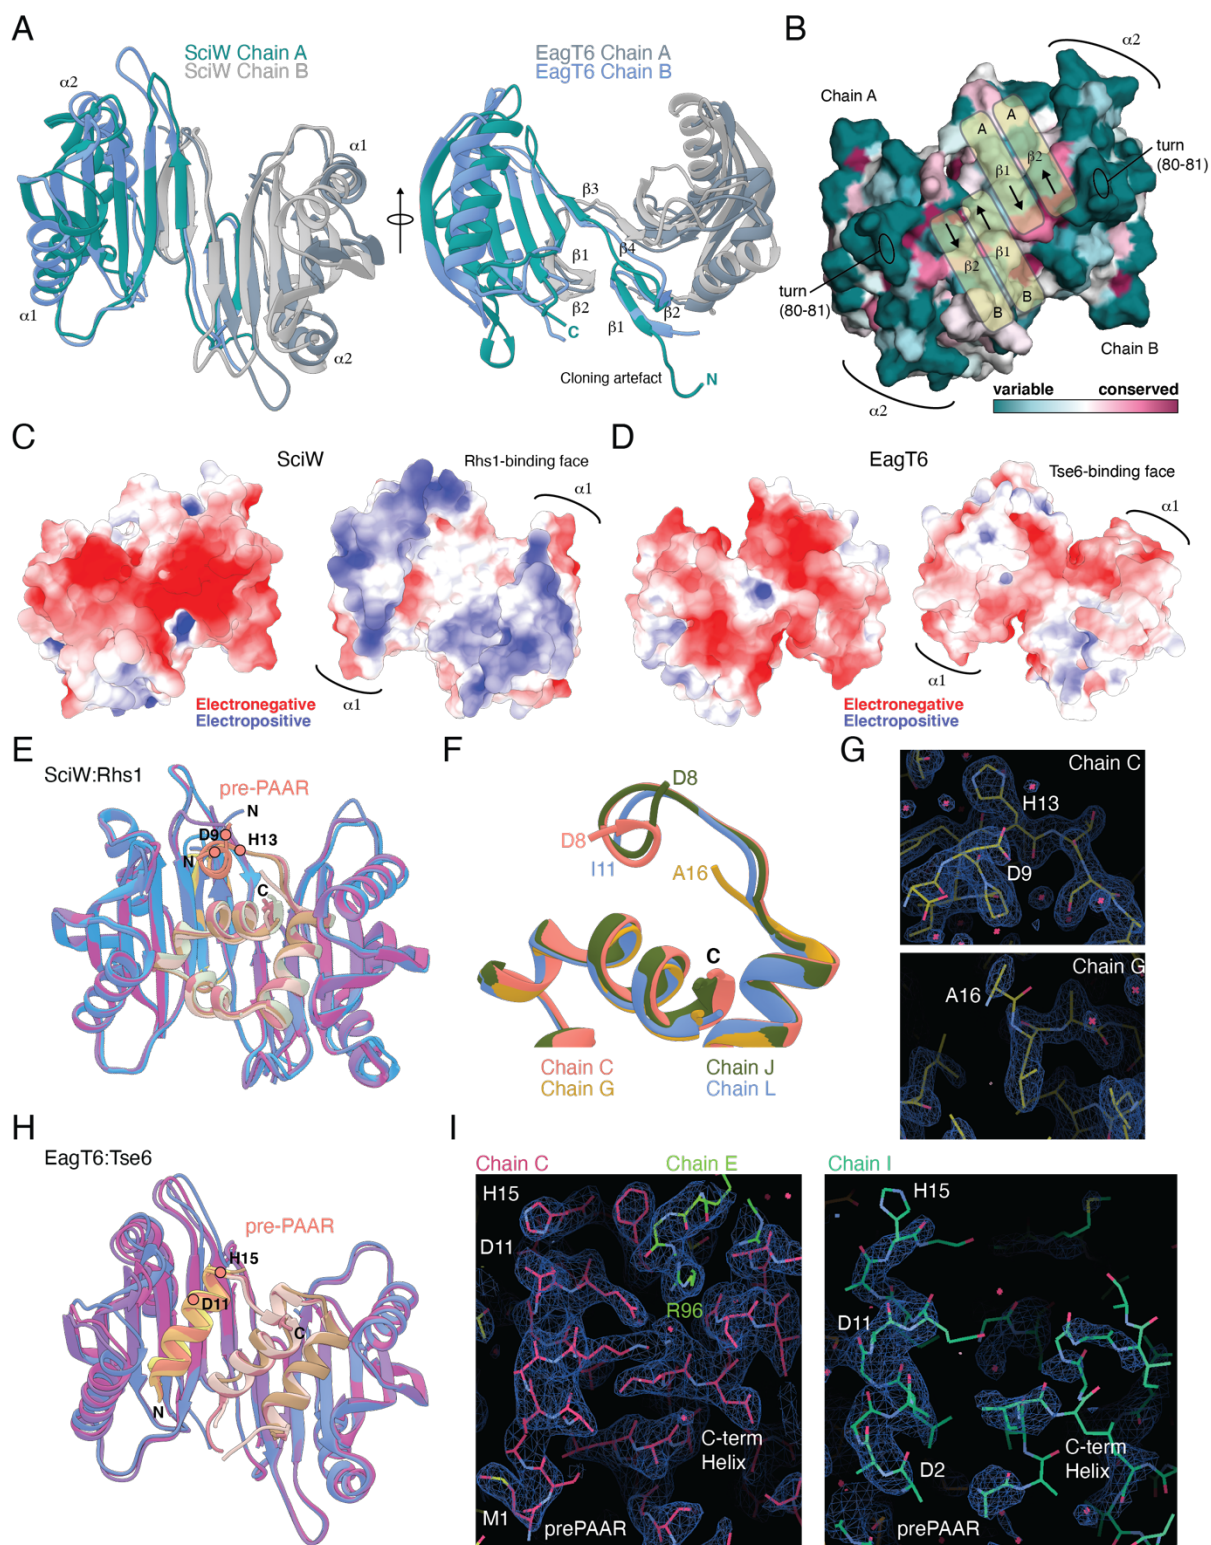

Supplement: supp [file elife-62816-supp-v1.zip]

Figure 6—supplement 1

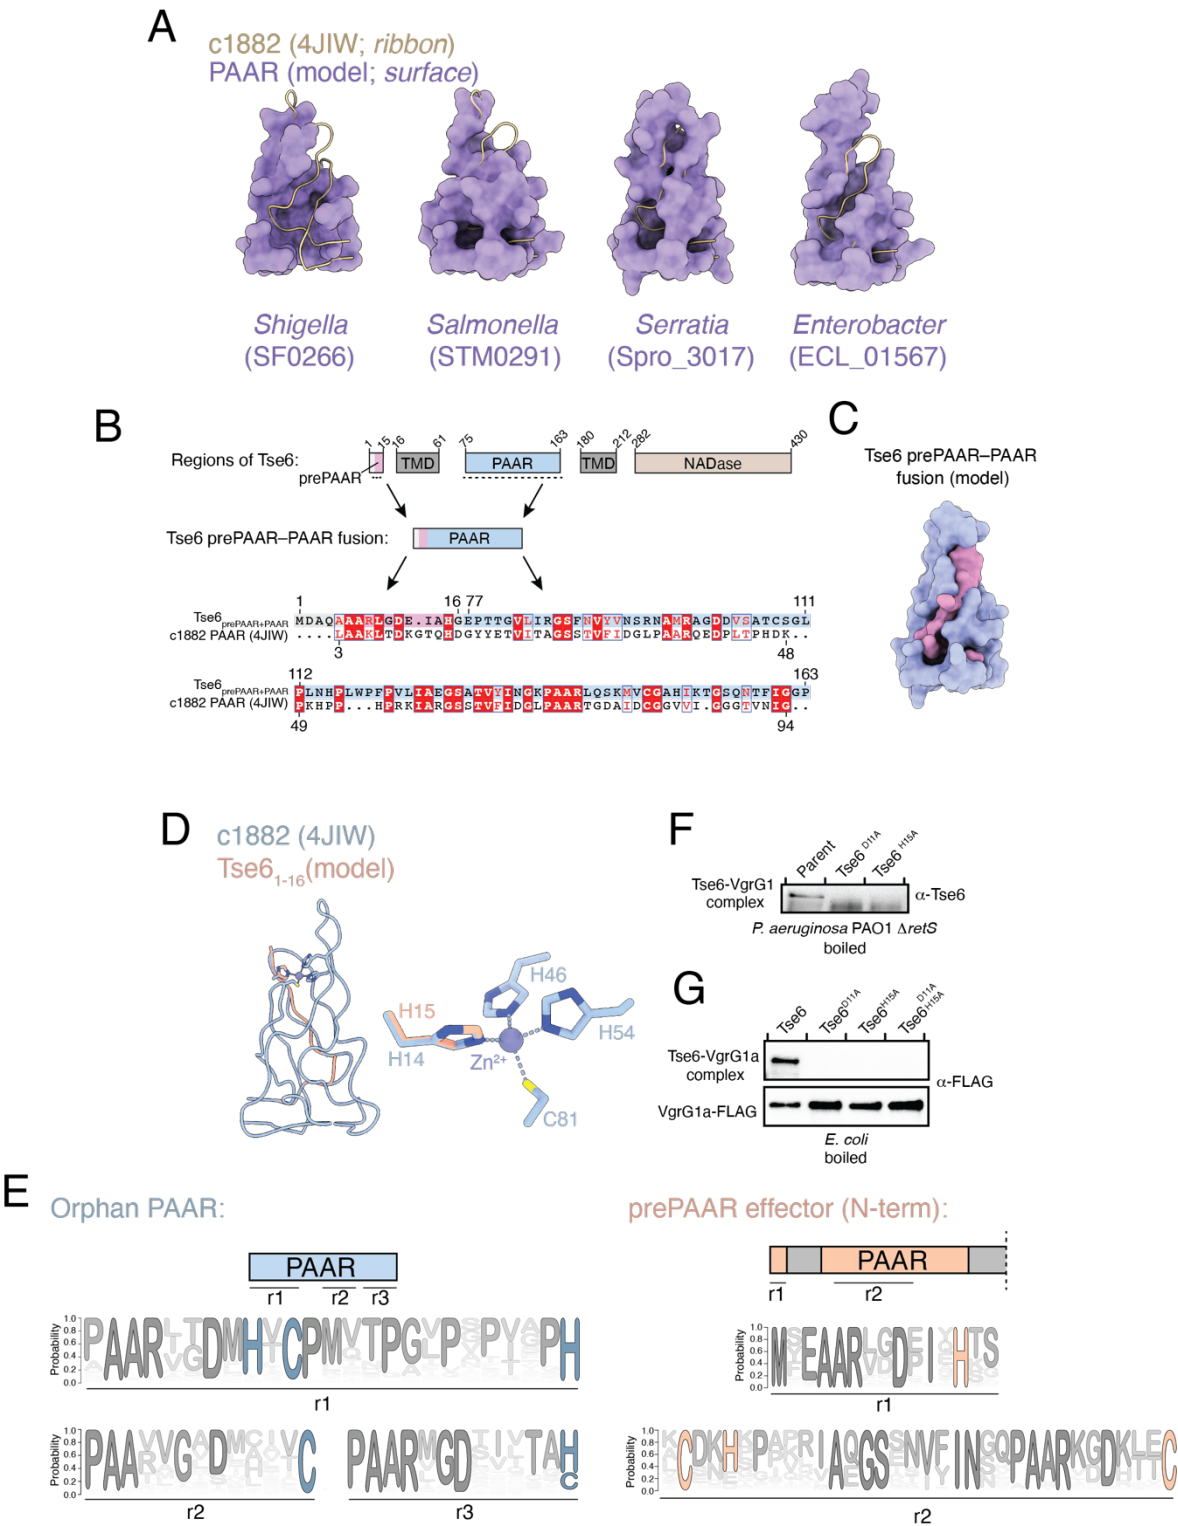

Supplement: supp [file elife-62816-supp-v1.zip]

Figure 3—supplement 1

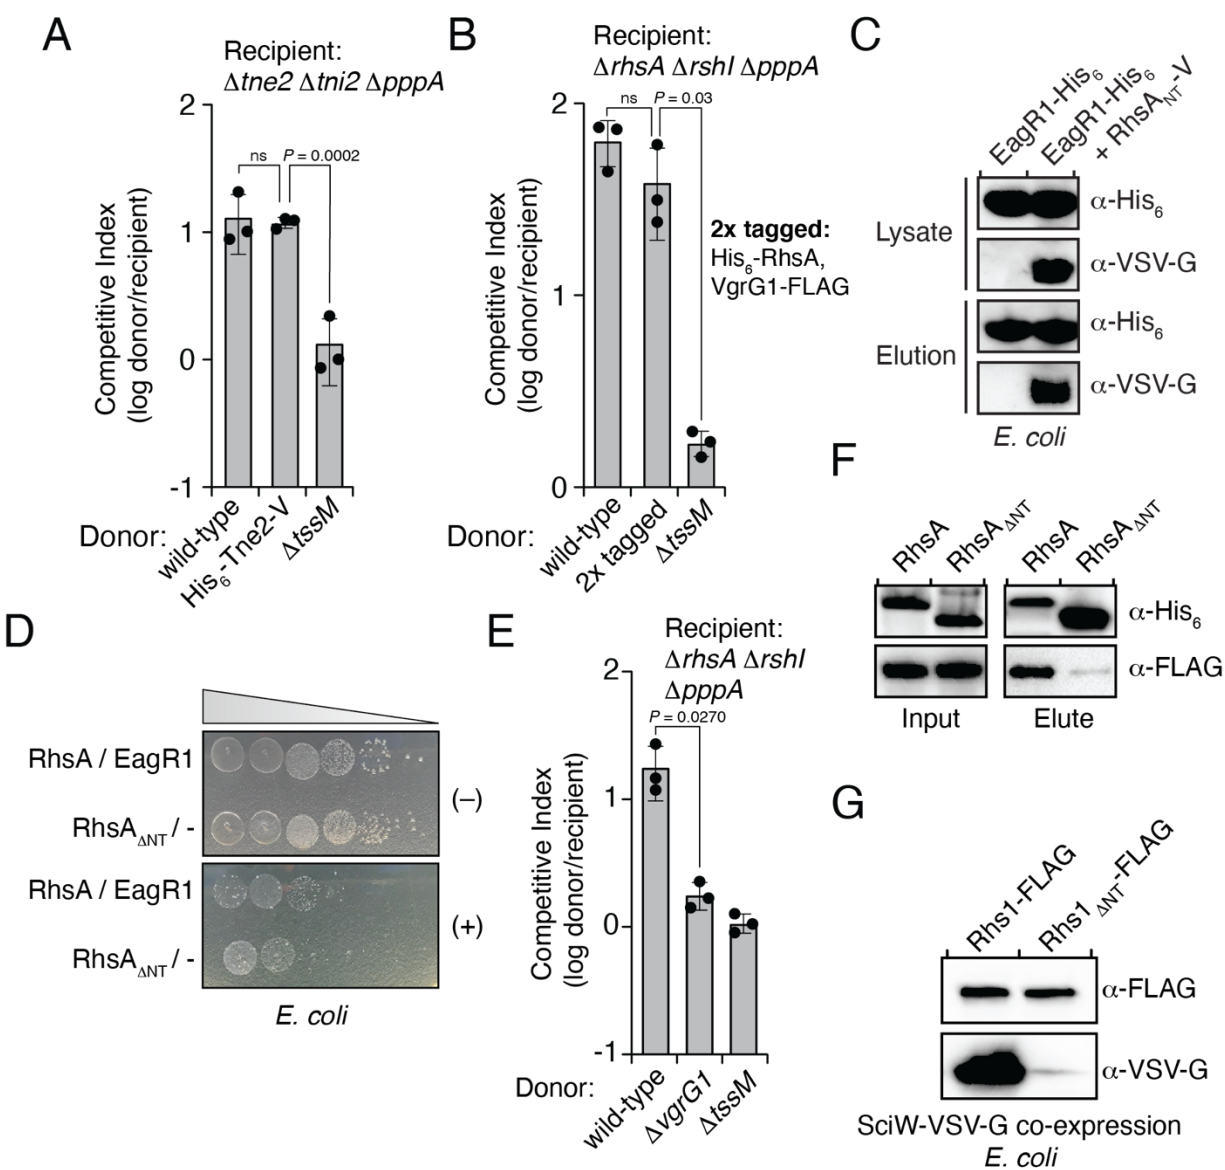

Supplement: supp [file elife-62816-supp-v1.zip]

Figure 6—supplement 2

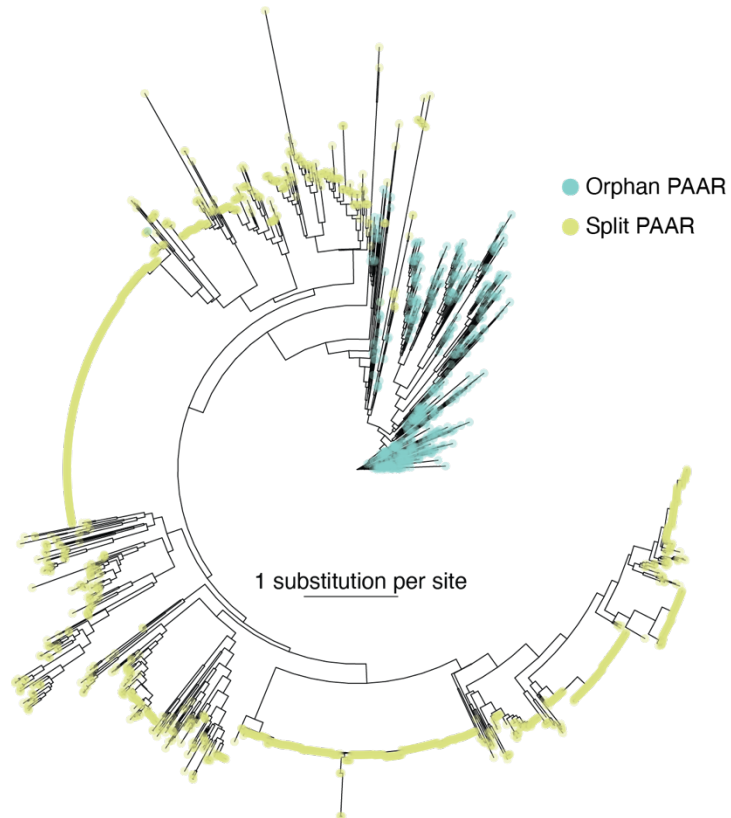

Supplement: supp [file elife-62816-supp-v1.zip]

Figure 1 —supplement 1

A

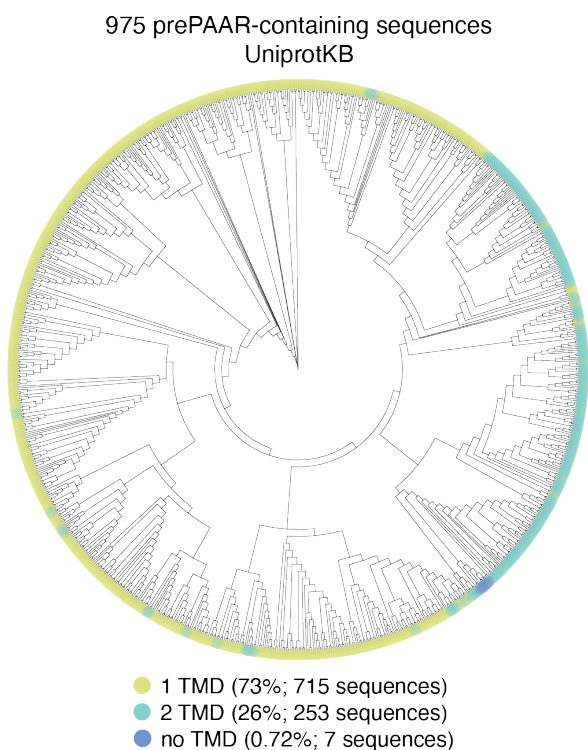

B

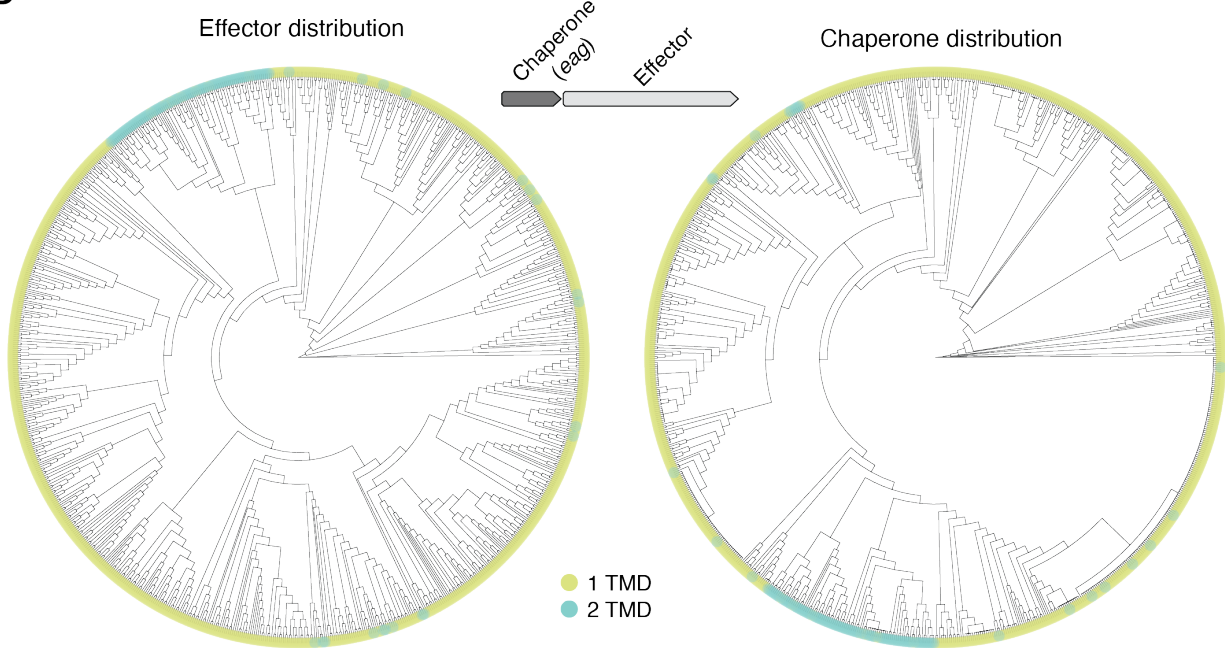

C

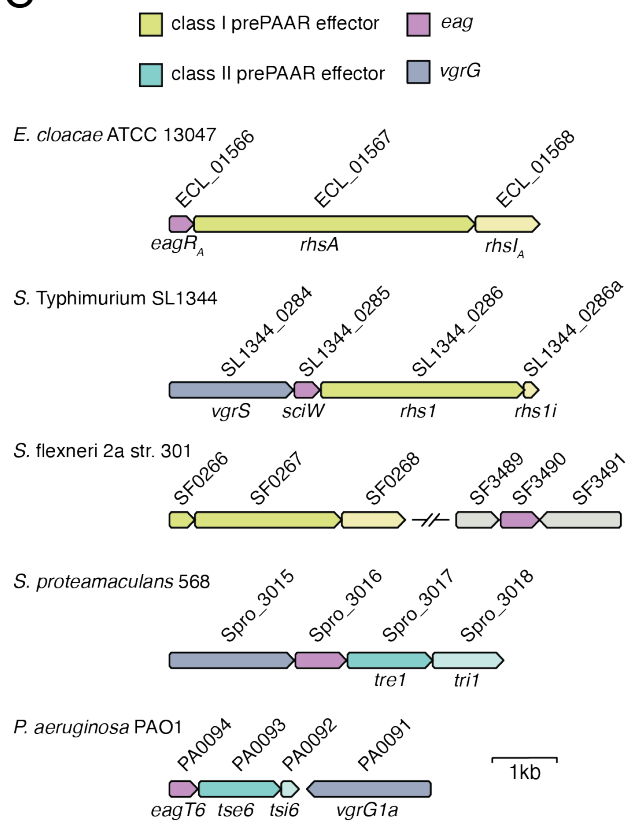

Supplement: supp [file elife-62816-supp-v1.zip]
